# Supplementary material for: Improved discovery of genetic interactions using CRISPRiSeq across multiple environments
Source: Genome Res. 2019 Apr;29(4):668–81. doi: 10.1101/gr.246603.118 (PMC6442382; doi:10.1101/gr.246603.118)
Supplement: Supplemental Material [file supp_gr.246603.118_Supplemental_Table_S3.xlsx]

## Sheet: read_me
Each tab is GI data from one condition and contains the following columns
	Strain:	Name of strain assayed (names of two guides carried in the strain separated by a dash)
	gi_score_method1:	Genetic interaction score calculated after the mean of fitness across replicate cultures was taken (see Methods)
	zscore_method1:	Z-score used to call significance of genetic interaction score using above method 1 (see Methods)
	gi_score_method2:	Mean genetic interaction score across replicate cultures. GI score was calculated separately for each replicate culture (see Supplemental Note 1)
	qval_method2:	Adjusted p-val (or qval) using Benjamini-Hochberg correction to call significance of genetic interaction scores using above method 2 (see Supplemental Note 1)

## Sheet: ypd24hr
strain	gi_score_method1	zscore_method1	gi_score_method2	qval_method2
PRE7g7-RPL15A-NRg-4	-0.00259988	-0.078285	-0.00137423	0.975905
PRE7g7-RPL15A-NRg-5	-0.021314	-0.317815	-0.021023	0.841955
PRE7g7-KRE33-TRg-1	-0.00189692	-0.0692875	-0.00147508	0.798112
PRE7g7-PMI40-NRg-1	0.0426958	0.501474	0.0419739	0.584154
PRE7g7-NOP19-NRg-3	0.0105044	0.0894429	0.0109158	0.958614
PRE7g7-SRP14-NRg-4	0.0286604	0.32183	0.0290265	0.843899
PRE7g7-SEC27-TRg-2	0.0133342	0.125663	0.0156636	0.964344
PRE7g7-GPI14-TRg-3	-0.0247753	-0.362119	-0.0254435	0.376652
PRE7g7-PAH1-TRg-7	0.193092	2.42647	0.193939	0.377788
PRE7g7-PAH1-TRg-6	0.166952	2.09189	0.167663	0.234111
PRE7g7-PAH1-TRg-5	0.191729	2.40902	0.192587	0.523064
PRE7g7-PAH1-TRg-3	0.137782	1.71852	0.138607	0.283883
PRE7g7-COG3-TRg-1	-0.0239465	-0.35151	-0.0233558	0.472769
PRE7g7-HTS1-NRg-5	0.00684807	0.0426434	0.00701434	0.980323
PRE7g7-MSN5-TRg-7	NA	NA	NA	NA
PRE7g7-ERG26-TRg-1	0.0544728	0.652213	0.0541692	0.724797
PRE7g7-SMD2-TRg-5	-0.00715523	-0.136591	-0.00704291	0.922799
PRE7g7-SMD2-TRg-4	0.00359374	0.000989925	0.00297985	0.994095
PRE7g7-SMD2-TRg-1	0.0533287	0.63757	0.0532593	0.68635
PRE7g7-PRE7-TRg-4	0.0402519	0.470194	0.0414318	0.691042
PRE7g7-PRE7-TRg-7	-0.00582297	-0.119539	-0.00615748	0.889854
PRE7g7-SEC6-TRg-3	-0.0639988	-0.864157	-0.0629439	0.301842
PRE7g7-ESF2-NRg-1	0.0449414	0.530217	0.0448527	0.707422
PRE7g7-ESF2-NRg-3	0.00670466	0.0408079	0.00736988	0.978322
PRE7g7-AFG2-TRg-2	-0.0164499	-0.255558	-0.01666	0.806594
PRE7g7-RRP36-TRg-3	0.00117097	-0.0300202	0.00223661	0.98969
PRE7g7-RRP36-TRg-5	0.0347106	0.399269	0.0349109	0.310835
PRE7g7-GCR1-NRg-2	-0.0114749	-0.19188	-0.0118068	0.763459
PRE7g7-PRE4-NRg-4	-0.0338029	-0.477666	-0.0328803	0.299206
PRE7g7-PRE4-NRg-9	0.0243676	0.266884	0.0240829	0.396999
PRE7g7-DSN1-NRg-2	-0.0387562	-0.541065	-0.0388368	0.592394
PRE7g7-GPI11-TRg-3	-0.0681711	-0.91756	-0.0677796	0.270921
PRE7g7-POP3-TRg-1	-0.00757266	-0.141934	-0.00792882	0.860732
PRE7g7-MNE1-TRg-5	-0.176581	-2.30515	-0.176018	0.376633
PRE7g7-RRP12-NRg-1	0.0700559	0.851668	0.0702692	0.57198
PRE7g7-RSC6-TRg-2	0.0697708	0.848019	0.0705332	0.437832
PRE7g7-CDC25-TRg-1	-0.0263668	-0.382488	-0.025172	0.840648
PRE7g7-CDC25-TRg-9	-0.193805	-2.52561	-0.192805	0.271491
PRE7g7-YPP1-NRg-3	0.0597843	0.720198	0.0595986	0.563231
PRE7g7-NFS1-NRg-9	-0.0229256	-0.338442	-0.0227302	0.61192
PRE7g7-NFS1-NRg-8	0.0571414	0.686371	0.0572171	0.456763
PRE7g7-UBA2-TRg-1	-0.00388432	-0.0947251	-0.00428101	0.874671
PRE7g7-ARP2-NRg-3	-0.0637578	-0.861072	-0.061827	0.689107
PRE7g7-MAK16-TRg-1	0.0697432	0.847667	0.0698689	0.357268
PRE7g7-CEP3-NRg-1	-0.0466857	-0.642559	-0.0457224	0.632881
PRE7g7-GUK1-TRg-5	0.057417	0.689898	0.0574867	0.563927
PRE7g7-GUK1-TRg-2	0.00254357	-0.0124517	0.00302219	0.974745
PRE7g7-GPI12-NRg-6	-0.0777974	-1.04077	-0.0772635	0.463789
PRE7g7-RPS5-NRg-5	-0.172129	-2.24817	-0.171349	0.470625
PRE7g7-RPS5-NRg-2	-0.0309486	-0.441133	-0.0308387	0.546976
PRE7g7-RPC19-NRg-1	0.0678268	0.823137	0.067518	0.465899
PRE7g7-TIM54-TRg-1	0.0225531	0.24366	0.0220289	0.833879
PRE7g7-TEN1-TRg-2	0.0694741	0.844221	0.0700686	0.603147
PRE7g7-SAH1-NRg-4	0.073309	0.893306	0.0733008	0.484035
PRE7g7-SAH1-NRg-5	0.106678	1.32041	0.107168	0.463789
PRE7g7-SAH1-NRg-3	0.112668	1.39708	0.11271	0.325512
PRE7g7-ATP15-NRg-5	0.0901878	1.10935	0.0910614	0.37359
PRE7g7-SCD5-TRg-5	0.0383319	0.445618	0.0384617	0.580245
PRE7g7-ARB1-NRg-2	0.00860727	0.0651603	0.00879717	0.961096
PRE7g7-ARB1-NRg-4	-0.0241682	-0.354347	-0.0244061	0.548336
PRE7g7-PUP2-TRg-1	0.0313004	0.35562	0.0319832	0.651943
PRE7g7-CCT8-TRg-2	NA	NA	NA	NA
PRE7g7-MCM4-TRg-1	0.0588846	0.708682	0.0596164	0.760385
PRE7g7-LSM4-TRg-1	-0.0549239	-0.748003	-0.0554784	0.36571
PRE7g7-NOP53-NRg-1	-0.0236426	-0.34762	-0.0228676	0.387847
PRE7g7-ATP3-TRg-4	-0.0209218	-0.312795	-0.0203532	0.780825
PRE7g7-AFG2-NRg-3	-0.0171282	-0.264239	-0.0176976	0.754931
PRE7g7-PRO3-NRg-3	-0.0775907	-1.03813	-0.0782239	0.616291
PRE7g7-NRD1-NRg-10	0.109355	1.35467	0.109653	0.416378
PRE7g7-SEC61-TRg-2	-0.0067704	-0.131665	-0.00690483	0.805154
PRE7g7-RHO3-TRg-4	0.0275299	0.30736	0.0270269	0.726558
PRE7g7-SNF2-TRg-6	-0.0163865	-0.254746	-0.0168909	0.838269
PRE7g7-SMD2-NRg-3	0.0257607	0.284715	0.0261054	0.918729
PRE7g7-RSC4-TRg-2	0.0635662	0.768604	0.0632237	0.55056
PRE7g7-RSC4-TRg-1	0.195511	2.45743	0.195724	0.344019
PRE7g7-TIF34-TRg-2	-0.00934095	-0.164567	-0.00750671	0.921465
PRE7g7-BET1-NRg-1	0.0821687	1.00671	0.0830226	0.315657
PRE7g7-CDC8-NRg-2	-0.0314578	-0.44765	-0.0313218	0.263535
PRE7g7-PRP42-TRg-2	0.0689174	0.837097	0.0691259	0.6859
PRE7g7-RRB1-TRg-2	-0.0424251	-0.588026	-0.0427528	0.595108
PRE7g7-SPC24-TRg-1	-0.0193455	-0.292619	-0.0190203	0.832531
PRE7g7-ILS1-NRg-1	0.0449314	0.530089	0.044793	0.46697
PRE7g7-GFA1-TRg-2	0.0157458	0.15653	0.0158368	0.931773
PRE7g7-SEC21-NRg-10	0.122102	1.51783	0.122531	0.37237
PRE7g7-RPC10-NRg-1	0.0187746	0.195296	0.0192778	0.876695
PRE7g7-RPB10-TRg-3	0.0818318	1.00239	0.0825126	0.609951
PRE7g7-RPB10-TRg-2	-0.00520997	-0.111693	-0.00472594	0.802799
PRE7g7-YNL181W-TRg-1	0.0708594	0.861953	0.0710027	0.45068
PRE7g7-RAD3-NRg-1	0.025432	0.280507	0.0250229	0.776107
PRE7g7-NOP10-TRg-1	0.0833518	1.02185	0.0838613	0.193675
PRE7g7-BFR2-TRg-3	0.0110395	0.0962909	0.0110336	0.853378
PRE7g7-MCM2-TRg-6	-0.0478141	-0.657002	-0.0475915	0.517523
PRE7g7-MCM2-TRg-4	0.0166211	0.167733	0.0163017	0.919514
PRE7g7-MPP10-TRg-1	-0.0544842	-0.742376	-0.0535521	0.330202
PRE7g7-RET2-TRg-4	0.122947	1.52865	0.124623	0.303333
PRE7g7-RET2-TRg-1	0.17687	2.21883	0.178331	0.320512
PRE7g7-RPS2-NRg-1	-0.105407	-1.39416	-0.104153	0.467561
PRE7g7-RPS2-NRg-2	-0.140798	-1.84715	-0.139843	0.312073
PRE7g7-ORC4-NRg-3	-0.037891	-0.529992	-0.0376702	0.454313
PRE7g7-TIP20-TRg-7	0.0312593	0.355094	0.0313253	0.794516
PRE7g7-SMT3-TRg-1	-0.0596648	-0.808684	-0.0598122	0.422576
PRE7g7-MSS18-NRg-6	0.00323517	-0.00359967	0.00277867	0.994242
PRE7g7-YEF3-NRg-9	-0.0663949	-0.894826	-0.0640867	0.492692
PRE7g7-ASK1-NRg-1	-0.101654	-1.34612	-0.101558	0.300593
PRE7g7-SMC1-TRg-1	-0.100012	-1.32511	-0.0992471	0.615247
PRE7g7-NIP1-NRg-1	-0.0107618	-0.182752	-0.0110042	0.918755
PRE7g7-RPP1-NRg-1	-0.0151458	-0.238866	-0.0148724	0.904193
PRE7g7-YDJ1-TRg-6	-0.0304455	-0.434693	-0.0300703	0.791067
PRE7g7-SUB2-NRg-1	0.0227683	0.246414	0.0227999	0.814281
PRE7g7-TIM10-NRg-8	0.00890273	0.068942	0.00880438	0.963518
PRE7g7-TIM10-NRg-4	-0.0315975	-0.449438	-0.0313311	0.548469
PRE7g7-TIM10-NRg-7	-0.0124501	-0.204362	-0.0124353	0.823383
PRE7g7-SKI6-TRg-4	0.0723153	0.880588	0.0720227	0.565746
PRE7g7-TUB4-TRg-1	-0.0307589	-0.438705	-0.0302074	0.809929
PRE7g7-CDC37-NRg-2	0.0213257	0.227949	0.0223166	0.805314
PRE7g7-ISD11-TRg-3	0.0801315	0.98063	0.0796464	0.258477
PRE7g7-YOS1-TRg-4	-0.0801797	-1.07126	-0.0804412	0.49818
PRE7g7-SSC1-TRg-6	-0.00855213	-0.15447	-0.00779302	0.847775
PRE7g7-MTR3-TRg-5	0.0650748	0.787913	0.0649835	0.535268
PRE7g7-MTR3-TRg-6	0.019106	0.199539	0.0188568	0.7081
PRE7g7-TFA1-TRg-2	0.0215681	0.231051	0.0216016	0.808096
PRE7g7-CDC3-NRg-3	-0.05151	-0.704307	-0.0511203	0.729881
PRE7g7-ERG25-TA-18	0.125126	1.55653	0.125008	0.236482
PRE7g7-RPB11-TRg-4	-0.00906689	-0.161059	-0.00876405	0.774224
PRE7g7-RPB11-TRg-1	-0.0125907	-0.206162	-0.0116152	0.924966
PRE7g7-RPB11-TRg-2	0.0280751	0.314338	0.0290358	0.469136
PRE7g7-DED1-TRg-3	-0.00442683	-0.101669	-0.00429902	0.879162
PRE7g7-DED1-TRg-1	-0.0211699	-0.315971	-0.0207138	0.507906
PRE7g7-DED1-TRg-6	-0.0211451	-0.315653	-0.0209247	0.80258
PRE7g7-DED1-TRg-4	0.0821413	1.00635	0.082514	0.338964
PRE7g7-RPL10-NRg-5	-0.0115162	-0.192409	-0.0117034	0.833467
PRE7g7-RPL10-NRg-4	0.0180212	0.185653	0.0182861	0.910823
PRE7g7-EFB1-NRg-1	0.0290275	0.326528	0.0286802	0.863952
PRE7g7-EFB1-NRg-5	0.000247489	-0.0418403	0.000150308	0.959696
PRE7g7-EFB1-NRg-4	0.0898452	1.10496	0.0905424	0.448508
PRE7g7-RPT3-NRg-1	-0.144212	-1.89085	-0.143836	0.304291
PRE7g7-SAC6-TRg-8	-0.222096	-2.88771	-0.222232	0.203259
PRE7g7-SAC6-TRg-4	-0.144988	-1.90077	-0.145245	0.458887
PRE7g7-SAC6-TRg-5	-0.07934	-1.06052	-0.0793271	0.609736
PRE7g7-SAC6-TRg-3	-0.112041	-1.47907	-0.112824	0.562012
PRE7g7-DIM1-TRg-5	0.0463664	0.548457	0.0469536	0.582673
PRE7g7-DIM1-TRg-7	-0.0499632	-0.684509	-0.0503258	0.58879
PRE7g7-RPC17-NRg-1	0.0387253	0.450654	0.0393682	0.67834
PRE7g7-RPC17-NRg-2	0.0750992	0.91622	0.075394	0.152231
PRE7g7-YDR341C-TRg-1	0.0761544	0.929726	0.0779353	0.314709
PRE7g7-RAP1-NRg-8	-0.0993221	-1.31628	-0.0998351	0.456072
PRE7g7-RAP1-NRg-5	-0.0559335	-0.760925	-0.055096	0.43314
PRE7g7-RAP1-NRg-2	0.0180134	0.185553	0.017621	0.778394
PRE7g7-SEC26-NRg-3	0.0371924	0.431033	0.0371875	0.496501
PRE7g7-SPP41-TRg-3	-0.00249861	-0.0769888	-0.00174839	0.922121
PRE7g7-TAP42-NRg-1	0.0211579	0.225801	0.0207658	0.873273
PRE7g7-PGA2-TRg-6	-0.0472738	-0.650086	-0.0472102	0.639528
PRE7g7-BRL1-TRg-1	-0.0251721	-0.367197	-0.0235357	0.446779
PRE7g7-FOL2-TRg-1	0.0167677	0.169609	0.0166485	0.906974
PRE7g7-NAB3-NRg-5	0.0780839	0.954422	0.0779372	0.418073
PRE7g7-SNF4-TRg-4	0.0385077	0.447869	0.0395482	0.686961
PRE7g7-HRR25-TRg-2	-0.11779	-1.55266	-0.116707	0.478711
PRE7g7-TRS23-TRg-4	0.0633043	0.765252	0.0645453	0.31611
PRE7g7-CTR86-TRg-4	-0.0560917	-0.76295	-0.0562419	0.595113
PRE7g7-RPB5-TRg-5	0.0530304	0.633751	0.0546435	0.63381
PRE7g7-SPN1-NRg-2	-0.0250755	-0.36596	-0.0235167	0.575433
PRE7g7-SPN1-NRg-1	-0.00528895	-0.112704	-0.00449497	0.942009
PRE7g7-SEC61-NRg-1	-0.0404967	-0.563343	-0.0400889	0.683973
PRE7g7-SEC61-NRg-7	-0.0218405	-0.324554	-0.0219206	0.646496
PRE7g7-TUS1-TRg-3	0.0100608	0.0837647	0.0103176	0.933282
PRE7g7-OLE1-NRg-2	-0.0854326	-1.1385	-0.0844255	0.624527
PRE7g7-AFG2-TRg-1	0.162924	2.04033	0.163335	0.319237
PRE7g7-TOA2-NRg-1	0.118811	1.47571	0.119048	0.350776
PRE7g7-USO1-TRg-1	0.0381014	0.442669	0.0391806	0.704613
PRE7g7-UTP22-NRg-2	0.0497152	0.591319	0.0497734	0.381097
PRE7g7-RIB1-TRg-3	-0.0651227	-0.878542	-0.0646521	0.461265
PRE7g7-RIB1-TRg-7	0.0526535	0.628928	0.0531869	0.532895
PRE7g7-RIB1-TRg-4	-0.0820128	-1.09473	-0.0818956	0.42196
PRE7g7-COG1-TRg-1	0.0177185	0.181779	0.0189114	0.865316
PRE7g7-RPL32-NRg-2	-0.0484951	-0.665719	-0.0474923	0.459373
PRE7g7-GLC7-NRg-3	-0.0587547	-0.797036	-0.0585657	0.604114
PRE7g7-GLC7-NRg-4	0.0957348	1.18034	0.0965521	0.310057
PRE7g7-HSF1-TRg-2	0.0293792	0.331029	0.0292987	0.776554
PRE7g7-DAM1-NRg-5	-0.00952224	-0.166887	-0.00953845	0.861337
PRE7g7-SEC18-TRg-4	0.0603716	0.727714	0.0610777	0.444602
PRE7g7-SEC18-TRg-5	0.0537568	0.643049	0.0545045	0.570818
PRE7g7-PAB1-NRg-3	0.112793	1.39867	0.113734	0.336558
PRE7g7-POP8-TRg-2	0.0300032	0.339016	0.0307713	0.663584
PRE7g7-PAB1-NRg-4	0.0826702	1.01312	0.0839155	0.690159
PRE7g7-BIG1-TRg-4	-0.0580493	-0.788006	-0.0573406	0.641118
PRE7g7-BIG1-TRg-5	0.0867466	1.0653	0.0869272	0.562012
PRE7g7-BIG1-TRg-6	0.080817	0.989404	0.0814244	0.47144
PRE7g7-RPO41-NRg-1	0.126644	1.57597	0.126811	0.257315
PRE7g7-RVB2-NRg-2	-0.062191	-0.841018	-0.0629034	0.412702
PRE7g7-PET117-NRg-8	0.0270305	0.300967	0.0280648	0.765768
PRE7g7-VPS45-NRg-9	0.105128	1.30057	0.105722	0.362328
PRE7g7-YCG1-NRg-1	0.0649356	0.786131	0.0653084	0.600077
PRE7g7-NOC4-NRg-1	-0.017081	-0.263636	-0.0166153	0.724153
PRE7g7-NMD3-NRg-2	-0.0485975	-0.667029	-0.0490968	0.592309
PRE7g7-DRS1-TRg-2	0.0412237	0.482633	0.0407783	0.702619
PRE7g7-HTB1-NRg-2	-0.014577	-0.231586	-0.0146857	0.47636
PRE7g7-IPI1-TRg-2	-0.0461203	-0.635322	-0.0456767	0.636608
PRE7g7-SEC18-NRg-1	-0.0544135	-0.741471	-0.0527244	0.544458
PRE7g7-SEC18-NRg-2	0.0185899	0.192933	0.0196563	0.887574
PRE7g7-JIP5-NRg-2	-0.0288217	-0.41391	-0.0294975	0.704606
PRE7g7-YPT1-TRg-3	0.0236387	0.257554	0.0253689	0.653756
PRE7g7-YPT1-TRg-2	0.0183644	0.190046	0.0198091	0.649899
PRE7g7-CLF1-NRg-2	-0.0202051	-0.303622	-0.0197746	0.588769
PRE7g7-SNF2-NRg-7	-0.0633349	-0.85566	-0.0640146	0.426441
PRE7g7-SNF2-NRg-4	-0.0743002	-0.996009	-0.0747089	0.398066
PRE7g7-RPL25-NRg-1	-0.000452722	-0.0508026	0.00138185	0.988428
PRE7g7-NOP56-TRg-1	0.0104178	0.0883342	0.00994663	0.959384
PRE7g7-NOP56-TRg-2	0.00494523	0.0182881	0.00497925	0.996577
PRE7g7-TRS31-TRg-1	0.0760206	0.928013	0.0773394	0.667063
PRE7g7-DBF4-TRg-2	0.0239	0.260899	0.0253999	0.820815
PRE7g7-DBF4-TRg-1	0.0240885	0.263312	0.0248628	0.895915
PRE7g7-RPC19-TRg-4	0.0610052	0.735824	0.0608656	0.656664
PRE7g7-RPC19-TRg-6	0.106486	1.31795	0.106783	0.319516
PRE7g7-RPC19-TRg-3	0.0965065	1.19022	0.0971329	0.403677
PRE7g7-ROK1-NRg-1	-0.0294407	-0.421832	-0.0293403	0.617233
PRE7g7-CDC33-TRg-4	-0.0774399	-1.0362	-0.0771816	0.373854
PRE7g7-DHR2-TRg-3	0.0476245	0.564559	0.0480417	0.740346
PRE7g7-RRP42-NRg-5	-0.00678697	-0.131877	-0.00703431	0.958759
PRE7g7-CLF1-TRg-1	-0.115095	-1.51816	-0.114805	0.238452
PRE7g7-ERG11-NA-16	-0.112809	-1.4889	-0.112682	0.373788
PRE7g7-VAS1-NRg-4	0.0716547	0.872132	0.0725108	0.672266
PRE7g7-PIK1-NRg-2	0.0346218	0.398131	0.035421	0.369268
PRE7g7-SAR1-NRg-7	-0.185419	-2.41827	-0.18493	0.430029
PRE7g7-SAR1-NRg-4	-0.110612	-1.46077	-0.109146	0.465373
PRE7g7-RPS3-TRg-1	0.0408343	0.477648	0.0420526	0.56349
PRE7g7-YTM1-TRg-2	-0.0120243	-0.198912	-0.0119643	0.937271
PRE7g7-SUI3-NRg-5	0.0692237	0.841017	0.0693752	0.410698
PRE7g7-SUI3-NRg-2	0.018119	0.186906	0.0179992	0.684139
PRE7g7-RRP7-TRg-4	0.0423391	0.496909	0.0425964	0.703234
PRE7g7-RRP7-TRg-6	-0.00033437	-0.0492877	0.000349741	0.95588
PRE7g7-NIP7-TRg-2	-0.0226958	-0.335501	-0.0228926	0.513164
PRE7g7-MDM35-TRg-1	0.0184047	0.190562	0.0181814	0.892479
PRE7g7-ALA1-NRg-1	-0.00195779	-0.0700667	-0.00243025	0.961639
PRE7g7-DOA4-NRg-2	-0.00469732	-0.105131	-0.00502796	0.932143
PRE7g7-RPS13-NRg-1	-0.0348286	-0.490794	-0.0345037	0.873848
PRE7g7-YSF3-TRg-2	0.0684067	0.83056	0.0679494	0.690002
PRE7g7-RPS2-NRg-11	-0.197809	-2.57686	-0.196917	0.249267
PRE7g7-SSL1-TRg-10	-0.0129213	-0.210393	-0.0129163	0.679978
PRE7g7-NIP7-TRg-1	0.0214178	0.229128	0.0213187	0.923949
PRE7g7-LST8-NRg-1	-0.0741984	-0.994706	-0.0736235	0.293318
PRE7g7-TAF4-TRg-3	-0.0745538	-0.999255	-0.0731431	0.398387
PRE7g7-HAS1-TRg-2	0.0351338	0.404685	0.0358479	0.664561
PRE7g7-GLC7-TRg-2	NA	NA	NA	NA
PRE7g7-CDC45-NRg-1	0.00938682	0.0751381	0.0105383	0.738436
PRE7g7-SEC22-NRg-8	0.0368984	0.42727	0.0372516	0.600144
PRE7g7-YOS1-TRg-2	0.0582572	0.700652	0.0582292	0.535634
PRE7g7-RBA50-TRg-3	0.00663469	0.0399124	0.00658574	0.986662
PRE7g7-SPP41-NRg-2	0.0230576	0.250117	0.0232459	0.903166
PRE7g7-PRP46-TRg-2	0.0921095	1.13394	0.0920263	0.558569
PRE7g7-PGA2-NRg-1	0.0559609	0.67126	0.055959	0.346406
PRE7g7-CBF5-TRg-3	0.00646262	0.0377099	0.00608904	0.982399
PRE7g7-TCP1-NRg-3	0.0586895	0.706185	0.0587944	0.610227
PRE7g7-TCP1-NRg-2	0.0451362	0.53271	0.0452812	0.605123
PRE7g7-ERG26-NRg-2	-0.0633394	-0.855717	-0.0630333	0.679953
PRE7g7-ERG26-NRg-4	-0.0464513	-0.639559	-0.0458945	0.474355
PRE7g7-MES1-TRg-5	0.0474599	0.562453	0.0476035	0.258477
PRE7g7-HTS1-TRg-2	-0.000545319	-0.0519878	-0.000577186	0.96466
PRE7g7-SSS1-TRg-3	-0.0630609	-0.852153	-0.0625648	0.406248
PRE7g7-SSS1-TRg-2	-0.0356786	-0.501674	-0.035076	0.754468
PRE7g7-SYS1-TRg-7	0.0338177	0.38784	0.034617	0.826868
PRE7g7-SYS1-TRg-2	0.0734186	0.89471	0.0745793	0.152379
PRE7g7-SYS1-TRg-1	0.0607377	0.732401	0.0623275	0.615247
PRE7g7-BFR2-TRg-1	-0.029615	-0.424064	-0.0294514	0.526004
PRE7g7-EOS1-TRg-3	-0.177674	-2.31913	-0.17717	0.302396
PRE7g7-TAF4-NRg-1	0.049866	0.593249	0.0513648	0.407564
PRE7g7-ARL3-NRg-8	0.0362189	0.418574	0.0364887	0.68459
PRE7g7-RPN5-NRg-1	0.069565	0.845385	0.069347	0.549726
PRE7g7-TIM9-NRg-2	0.00823485	0.0603935	0.00819263	0.91873
PRE7g7-NUP57-NRg-3	0.108629	1.34538	0.109508	0.520274
PRE7g7-VPS4-TRg-1	0.0834811	1.0235	0.083836	0.495797
PRE7g7-CDC3-TRg-4	-0.0532439	-0.7265	-0.0533395	0.712611
PRE7g7-BBP1-NRg-1	-0.0668087	-0.900123	-0.0668883	0.391563
PRE7g7-BBP1-NRg-2	-0.116755	-1.5394	-0.1159	0.310728
PRE7g7-USE1-NRg-3	-0.0664505	-0.895537	-0.0660478	0.505523
PRE7g7-CCT7-TRg-1	-0.0240377	-0.352677	-0.0248442	0.556088
PRE7g7-SAH1-TRg-3	-0.0773883	-1.03553	-0.0769932	0.453811
PRE7g7-CHS2-TRg-1	-0.0230746	-0.34035	-0.02309	0.808603
PRE7g7-DPM1-TRg-2	-0.0286161	-0.411278	-0.0279584	0.630518
PRE7g7-BBP1-TRg-1	-0.0585946	-0.794986	-0.0572318	0.341498
PRE7g7-NRD1-TRg-4	0.168606	2.11305	0.169478	0.244556
PRE7g7-RPB3-NRg-1	-0.0410859	-0.570885	-0.0396109	0.746415
PRE7g7-PHO85-NRg-6	0.0318227	0.362305	0.0319594	0.664108
PRE7g7-SNF6-TRg-6	-0.0488634	-0.670433	-0.0488706	0.3475
PRE7g7-PRP38-NRg-2	0.0737852	0.899402	0.0744146	0.372886
PRE7g7-OAR1-NRg-3	0.125074	1.55588	0.124479	0.44231
PRE7g7-ROX3-NRg-1	-0.0863462	-1.15019	-0.0868031	0.286244
PRE7g7-YPP1-TRg-6	0.0627618	0.758308	0.063446	0.708806
PRE7g7-CBF2-NRg-8	-0.0751687	-1.00713	-0.0760094	0.583774
PRE7g7-SPT6-TRg-5	-0.0429338	-0.594537	-0.0421108	0.640784
PRE7g7-SEC10-NRg-1	0.00946746	0.0761703	0.0108177	0.861674
PRE7g7-NSL1-NRg-3	-0.0499164	-0.683911	-0.0484209	0.303149
PRE7g7-NRD1-NRg-8	0.0485417	0.576299	0.0496102	0.680631
PRE7g7-RPB3-TRg-1	-0.107292	-1.41828	-0.106477	0.216329
PRE7g7-NRD1-NRg-4	0.0199794	0.210717	0.0196325	0.784191
PRE7g7-RVB1-TRg-2	-0.0129212	-0.210392	-0.0120448	0.925367
PRE7g7-TIF5-NRg-8	0.0692273	0.841063	0.0700062	0.691726
PRE7g7-EOS1-NRg-1	-0.103247	-1.36651	-0.102814	0.318058
PRE7g7-ERG25-NA-26	-0.0374706	-0.524611	-0.0368503	0.615465
PRE7g7-MSL5-NRg-4	0.0657342	0.796353	0.0650022	0.721802
PRE7g7-SEC24-TRg-2	-0.0337556	-0.477061	-0.0319266	0.793749
PRE7g7-RPL30-NRg-5	-0.0112143	-0.188544	-0.0100657	0.91793
PRE7g7-SNU71-NRg-3	0.0668495	0.810628	0.0664667	0.211622
PRE7g7-CDC33-NRg-1	-0.0284705	-0.409414	-0.0286103	0.758423
PRE7g7-RPN6-TRg-4	0.0606489	0.731264	0.060588	0.629115
PRE7g7-NAB2-TRg-4	0.0768106	0.938125	0.0778289	0.634079
PRE7g7-NAB2-TRg-6	0.0402641	0.47035	0.0403905	0.56349
PRE7g7-YTM1-NRg-1	0.0356397	0.41116	0.0358279	0.836528
PRE7g7-OLE1-TRg-8	-0.102995	-1.36328	-0.102453	0.509236
PRE7g7-OLE1-TRg-1	-0.0880608	-1.17214	-0.0881166	0.486992
PRE7g7-UTP7-TRg-4	-0.0906439	-1.2052	-0.090306	0.419399
PRE7g7-ACT1-NRg-6	-0.121156	-1.59574	-0.120653	0.548285
PRE7g7-RPL18A-NRg-3	-0.0419591	-0.582061	-0.0405026	0.786369
PRE7g7-BRX1-NRg-1	-0.000447224	-0.0507322	-0.000272406	0.95171
PRE7g7-NAF1-TRg-8	0.00179702	-0.0220071	0.00148238	0.982045
PRE7g7-NAF1-TRg-6	0.0226587	0.24501	0.0225798	0.869819
PRE7g7-NAF1-TRg-4	-0.0390062	-0.544266	-0.0388211	0.724983
PRE7g7-CDC8-TRg-2	0.0218848	0.235105	0.0215199	0.898613
PRE7g7-NSE4-TRg-1	0.0593042	0.714053	0.0598534	0.332607
PRE7g7-PAB1-NRg-2	0.045812	0.54136	0.0465874	0.677645
PRE7g7-PRP43-TRg-4	0.0137682	0.131218	0.0148499	0.924486
PRE7g7-SEC2-NRg-3	-0.105705	-1.39798	-0.105499	0.423896
PRE7g7-SEC2-NRg-6	-0.00275964	-0.0803298	-0.00260998	0.954867
PRE7g7-MPP10-NRg-5	0.012034	0.109021	0.0121586	0.818813
PRE7g7-YDR355C-TRg-2	-0.00829851	-0.151224	-0.00776269	0.910988
PRE7g7-YLR339C-TRg-9	-0.0520579	-0.71132	-0.0515419	0.733946
PRE7g7-SNM1-TRg-2	0.0422045	0.495186	0.0425265	0.526889
PRE7g7-ALR1-NRg-4	-0.0794079	-1.06138	-0.0788235	0.506384
PRE7g7-ALR1-NRg-1	0.0409019	0.478514	0.0413812	0.693348
PRE7g7-ALR1-NRg-3	-0.0439256	-0.607231	-0.0431238	0.017317
PRE7g7-RPL10-TRg-1	0.0787977	0.963558	0.0780318	0.636841
PRE7g7-RPL28-TRg-2	-0.0762935	-1.02152	-0.0759053	0.441063
PRE7g7-UTP25-TRg-1	-0.00160085	-0.0654979	-0.00127063	0.976538
PRE7g7-POB3-TRg-1	0.0973309	1.20077	0.0974939	0.619445
PRE7g7-POB3-TRg-3	0.116495	1.44607	0.117541	0.181354
PRE7g7-POB3-TRg-2	0.111052	1.3764	0.110904	0.454954
PRE7g7-MED11-TRg-1	0.0576117	0.692389	0.0577553	0.613998
PRE7g7-ISA1-TRg-15	-0.0608453	-0.823795	-0.0577986	0.653206
PRE7g7-RRP1-NRg-1	-0.0228812	-0.337875	-0.0228252	0.668992
PRE7g7-MES1-NRg-1	0.0137765	0.131324	0.0144588	0.936539
PRE7g7-SEC13-NRg-5	0.048225	0.572245	0.0503933	0.685201
PRE7g7-MCM2-NRg-2	-0.0957421	-1.27045	-0.0956233	0.550476
PRE7g7-ALA1-TRg-4	-0.0419058	-0.581379	-0.0415512	0.762857
PRE7g7-MTG2-TRg-5	0.0652403	0.790031	0.0658305	0.291415
PRE7g7-TIF35-NRg-3	0.133771	1.66719	0.133617	0.452626
PRE7g7-NSE1-TRg-3	-0.00214571	-0.0724719	-0.00259678	0.949726
PRE7g7-NSE1-TRg-4	0.0637681	0.771188	0.0637341	0.256923
PRE7g7-MOB2-NRg-6	0.110567	1.37019	0.110723	0.286568
PRE7g7-VRG4-NRg-3	-0.136592	-1.79331	-0.135791	0.434378
PRE7g7-PRP9-TRg-3	-0.0853393	-1.1373	-0.0842293	0.19737
PRE7g7-HYM1-TRg-5	0.0231232	0.250956	0.0238668	0.851672
PRE7g7-POP1-TRg-5	0.0437429	0.514877	0.0439191	0.496197
PRE7g7-POP1-TRg-9	7.38835e-05	-0.0440623	0.000322968	0.98224
PRE7g7-RPL17A-TRg-1	-0.0376867	-0.527377	-0.0372058	0.584154
PRE7g7-SLD2-TRg-1	0.0324548	0.370396	0.0328671	0.832639
PRE7g7-CDC48-NRg-7	0.0275625	0.307777	0.0277048	0.145104
PRE7g7-FHL1-NRg-2	0.0155037	0.153431	0.0153896	0.680631
PRE7g7-BET3-NRg-7	0.00338681	-0.00165877	0.00350093	0.997608
PRE7g7-MAK21-TRg-1	0.067954	0.824765	0.0678788	0.22089
PRE7g7-BRN1-TRg-4	0.00424196	0.00928671	0.00602107	0.959384
PRE7g7-FBA1-NRg-3	-0.0381207	-0.532931	-0.0379424	0.739042
PRE7g7-CDC42-TRg-6	NA	NA	NA	NA
PRE7g7-CDC42-TRg-7	-0.0795792	-1.06358	-0.0788968	0.295419
PRE7g7-COG4-NRg-1	0.060631	0.731035	0.0606485	0.624653
PRE7g7-ATP3-NRg-3	0.0385933	0.448964	0.0382609	0.55563
PRE7g7-ATP3-NRg-2	0.066535	0.806604	0.0666311	0.393941
PRE7g7-SMP3-TRg-5	-0.0671891	-0.904992	-0.0673374	0.52845
PRE7g7-CFT2-NRg-2	0.0101446	0.0848374	0.0106105	0.961904
PRE7g7-FAS2-TRg-5	0.0098027	0.0804611	0.0107997	0.916637
PRE7g7-DBP2-NRg-3	-0.0262217	-0.380631	-0.0261692	0.559062
PRE7g7-DBP2-NRg-2	0.0364484	0.421512	0.0365125	0.346631
PRE7g7-MPS2-NRg-4	-0.0593608	-0.804793	-0.0593082	0.46483
PRE7g7-ARC35-TRg-2	-0.00929266	-0.163949	-0.00820913	0.881995
PRE7g7-ARC35-TRg-5	NA	NA	NA	NA
PRE7g7-MRD1-TRg-1	-0.0416993	-0.578736	-0.0412353	0.800475
PRE7g7-RLP7-TRg-1	0.0345611	0.397354	0.0350857	0.860763
PRE7g7-SPC34-TRg-1	-0.077315	-1.0346	-0.0765907	0.405638
PRE7g7-CDC45-TRg-2	0.00165239	-0.0238583	0.00154452	0.98788
PRE7g7-GCD6-TRg-3	0.0666008	0.807445	0.0671781	0.663708
PRE7g7-GCD6-TRg-4	-0.056396	-0.766845	-0.0566301	0.54565
PRE7g7-YPT6-NRg-2	0.048755	0.579028	0.0501119	0.716841
PRE7g7-RPS13-TRg-2	-0.0722787	-0.970135	-0.0716263	0.534984
PRE7g7-IPI3-TRg-3	-0.0206201	-0.308933	-0.0207908	0.249278
PRE7g7-TIF5-NRg-9	0.00549307	0.0253002	0.00613936	0.988594
PRE7g7-TIF5-NRg-7	0.0425115	0.499115	0.0423913	0.731913
PRE7g7-TIF5-NRg-6	0.041963	0.492095	0.0432386	0.779794
PRE7g7-NAB3-TRg-3	0.0562924	0.675503	0.0578382	0.619487
PRE7g7-GCD2-TRg-1	0.0778759	0.95176	0.0785796	0.49847
PRE7g7-UBA1-TRg-2	0.0815487	0.99877	0.0828253	0.275698
PRE7g7-SLD3-TRg-6	0.0880703	1.08224	0.089059	0.331128
PRE7g7-LCB1-TRg-5	0.00288427	-0.00809096	0.00310402	0.994335
PRE7g7-TOA2-TRg-6	0.0955748	1.1783	0.0964017	0.671989
PRE7g7-TOA2-TRg-1	0.00300298	-0.00657149	0.00341927	0.986544
PRE7g7-TOA2-TRg-3	-0.0652	-0.879532	-0.0659692	0.625815
PRE7g7-LSM2-TRg-1	-0.0474468	-0.652301	-0.0478893	0.520127
PRE7g7-YML6-TRg-13	-0.0364166	-0.51112	-0.0359213	0.823115
PRE7g7-YML6-TRg-12	-0.0818717	-1.09292	-0.0820122	0.63151
PRE7g7-UTP15-NRg-1	-0.0405289	-0.563756	-0.0408484	0.832343
PRE7g7-TIF6-NRg-8	0.0625406	0.755477	0.0621488	0.366128
PRE7g7-SUP35-NRg-1	0.0259856	0.287594	0.0263644	0.86454
PRE7g7-MPP10-NRg-1	-0.00930511	-0.164108	-0.00920048	0.633556
PRE7g7-SWI3-TRg-7	-0.0525517	-0.717641	-0.0529121	0.524493
PRE7g7-SSN3-NRg-2	-0.101175	-1.33999	-0.101371	0.393858
PRE7g7-SEC13-NRg-7	-0.0797776	-1.06612	-0.0788314	0.211242
PRE7g7-RPS15-NRg-3	-0.109116	-1.44163	-0.10822	0.305874
PRE7g7-RPL3-TRg-2	-0.0102491	-0.176191	-0.0098807	0.944895
PRE7g7-FBA1-NRg-2	-0.121444	-1.59942	-0.121152	0.211242
PRE7g7-FBA1-NRg-1	-0.132713	-1.74366	-0.133071	0.417006
PRE7g7-FBA1-NRg-5	-0.0900193	-1.1972	-0.0907562	0.476333
PRE7g7-DAM1-TRg-2	-0.0200924	-0.30218	-0.0180884	0.855933
PRE7g7-NHP2-TRg-2	0.0545757	0.653531	0.054676	0.531815
PRE7g7-HCA4-NRg-6	-0.00750405	-0.141056	-0.00697003	0.891626
PRE7g7-PRE3-TRg-4	-0.0906625	-1.20544	-0.0891696	0.423283
PRE7g7-DBP5-NRg-4	0.00119667	-0.0296912	0.000897156	0.974644
PRE7g7-SPT6-NRg-4	-0.0819633	-1.09409	-0.0813038	0.425727
PRE7g7-SPT6-NRg-2	-0.185161	-2.41497	-0.185133	0.388224
PRE7g7-RPL18A-TRg-4	0.00698325	0.0443737	0.00801382	0.976957
PRE7g7-KSH1-TRg-1	-0.0634472	-0.857097	-0.0630695	0.585854
PRE7g7-KSH1-TRg-3	-0.0312307	-0.444744	-0.031862	0.531881
PRE7g7-IPI3-NRg-1	0.0892128	1.09687	0.0899783	0.438124
PRE7g7-PGA2-TRg-8	0.0232091	0.252055	0.023078	0.68241
PRE7g7-RPL18A-TRg-2	0.0530265	0.633701	0.0528345	0.54934
PRE7g7-RPL33A-NRg-6	0.0376509	0.436902	0.0384188	0.804824
PRE7g7-TAF12-NRg-2	-0.0206106	-0.308812	-0.0206794	0.824551
PRE7g7-USE1-TRg-5	-0.010564	-0.180222	-0.010999	0.839389
PRE7g7-YNL114C-TRg-1	-0.0145426	-0.231145	-0.0144579	0.855771
PRE7g7-SMC5-TRg-7	0.0008712	-0.0338571	0.00128039	0.965841
PRE7g7-SMC5-TRg-6	-0.0551221	-0.750541	-0.0552623	0.816421
PRE7g7-RSC58-TRg-1	0.0460073	0.543859	0.0461706	0.642359
PRE7g7-CTF13-TRg-2	0.0234822	0.255552	0.0251341	0.843461
PRE7g7-NAB2-NRg-2	0.0607633	0.732729	0.0610801	0.53251
PRE7g7-MCM7-TRg-4	-0.0990117	-1.3123	-0.0977058	0.449676
PRE7g7-BCP1-NRg-5	0.0580397	0.697867	0.0586834	0.566888
PRE7g7-STU2-TRg-3	-0.0114628	-0.191725	-0.0104654	0.907658
PRE7g7-SEC21-NRg-6	0.106751	1.32135	0.107864	0.353749
PRE7g7-SEC21-NRg-3	0.0553185	0.663038	0.0563469	0.360187
PRE7g7-RPL1B-TRg-3	0.0367012	0.424747	0.0372425	0.797164
PRE7g7-SEC20-NRg-2	-0.0293658	-0.420874	-0.0295039	0.676155
PRE7g7-VMA3-NRg-2	0.0619948	0.74849	0.0623633	0.475828
PRE7g7-SEC23-NRg-5	0.0561468	0.67364	0.0561583	0.494953
PRE7g7-CDC28-TRg-4	-0.136301	-1.78959	-0.136381	0.382923
PRE7g7-RPN12-NRg-11	0.132095	1.64573	0.132644	0.433877
PRE7g7-PUP3-TRg-3	0.15294	1.91253	0.15398	0.38247
PRE7g7-SEC31-TRg-2	0.00862458	0.0653818	0.00885639	0.94884
PRE7g7-SED5-TRg-6	0.0771121	0.941984	0.0779026	0.66992
PRE7g7-SED5-TRg-5	0.0404873	0.473207	0.0408524	0.737926
PRE7g7-RPL33A-TRg-1	-0.0288598	-0.414397	-0.028681	0.286568
PRE7g7-RPL33A-TRg-2	-0.0706505	-0.949295	-0.0712671	0.21073
PRE7g7-MRPL11-TRg-2	0.148639	1.85749	0.148275	0.393858
PRE7g7-RTP1-NRg-2	-0.00858412	-0.15488	-0.00871163	0.85807
PRE7g7-NUG1-TRg-2	0.0253034	0.278862	0.0252521	0.861158
PRE7g7-VPH2-TRg-4	-0.0272528	-0.393829	-0.028022	0.719309
PRE7g7-COP1-NRg-3	0.0180578	0.186122	0.0189904	0.542709
PRE7g7-CRM1-NRg-1	-0.0486067	-0.667147	-0.048208	0.722615
PRE7g7-RPL5-NRg-4	0.0122101	0.111274	0.0142381	0.931268
PRE7g7-SNU13-NRg-4	-0.0262543	-0.381049	-0.0256094	0.739976
PRE7g7-PFS2-TRg-3	-0.0651317	-0.878658	-0.0645645	0.360895
PRE7g7-MPP10-TRg-2	-0.016524	-0.256506	-0.015972	0.837774
PRE7g7-TSR4-NRg-2	-0.0229783	-0.339117	-0.0231495	0.683167
PRE7g7-RSC2-TRg-1	0.163225	2.04418	0.163359	0.255922
PRE7g7-SEC65-TRg-2	0.0372169	0.431347	0.0372634	0.752544
PRE7g7-SMI1-NRg-1	0.0590412	0.710686	0.0588761	0.532847
PRE7g7-RTT105-NRg-4	0.0421552	0.494555	0.0422627	0.73516
PRE7g7-VMA5-TRg-3	0.0216096	0.231583	0.0216958	0.915562
PRE7g7-VMA5-TRg-5	-0.0438105	-0.605759	-0.0440729	0.497775
PRE7g7-RRP1-TRg-3	0.011602	0.103491	0.0112572	0.892705
PRE7g7-CLC1-TRg-2	0.0594046	0.715337	0.0603803	0.488189
PRE7g7-GCD6-NRg-1	-0.0132303	-0.214349	-0.012513	0.892222
PRE7g7-GCD6-NRg-2	-0.0918953	-1.22122	-0.0914479	0.387138
PRE7g7-PXR1-TRg-1	0.0680517	0.826016	0.0678269	0.525294
PRE7g7-CDC14-NRg-1	-0.0594659	-0.806138	-0.0595699	0.679655
PRE7g7-PCF11-TRg-6	0.00288427	-0.00809096	0.00449236	0.997741
PRE7g7-PCF11-TRg-5	-0.120642	-1.58916	-0.119379	0.416378
PRE7g7-PCF11-TRg-4	-0.0443873	-0.613141	-0.0426652	0.679004
PRE7g7-SEC31-NRg-1	NA	NA	NA	NA
PRE7g7-RRP5-NRg-1	0.0348708	0.401319	0.0349638	0.46729
PRE7g7-PRE10-TRg-5	-0.0027473	-0.0801719	-0.00260581	0.969248
PRE7g7-PRE10-TRg-1	0.0494148	0.587474	0.0497546	0.711221
PRE7g7-RPS5-TRg-2	-0.173999	-2.27209	-0.172472	0.259729
PRE7g7-NSP1-TRg-4	0.0320833	0.36564	0.0325866	0.556983
PRE7g7-PRP38-TRg-4	-0.0184295	-0.280896	-0.0186587	0.745147
PRE7g7-RCF1-NRg-5	0.0167215	0.169018	0.0166397	0.931367
PRE7g7-RSC3-TRg-4	-0.0054634	-0.114936	-0.00564397	0.888811
PRE7g7-RSC3-TRg-5	0.0128318	0.119231	0.0129783	0.860886
PRE7g7-RSC3-TRg-6	-0.0379381	-0.530594	-0.0382454	0.602423
PRE7g7-HTA1-NRg-12	-0.167773	-2.1924	-0.167157	0.288312
PRE7g7-HTA1-NRg-11	-0.0595806	-0.807607	-0.0594459	0.629024
PRE7g7-UTP23-TRg-2	0.0873746	1.07334	0.0873966	0.447681
PRE7g7-GCD7-NRg-1	-0.0390251	-0.544508	-0.0372982	0.761351
PRE7g7-GCD7-NRg-2	-0.0246962	-0.361105	-0.0248221	0.888755
PRE7g7-GCD7-NRg-6	0.0299373	0.338172	0.0302	0.746415
PRE7g7-GAL11-NRg-2	0.0112607	0.0991223	0.0106732	0.965923
PRE7g7-GAL11-NRg-9	-0.0536598	-0.731823	-0.053505	0.337118
PRE7g7-PHO4-TRg-5	-0.0173673	-0.2673	-0.0169266	0.680688
PRE7g7-SNP1-NRg-3	0.00850119	0.0638026	0.00856947	0.94869
PRE7g7-RPC37-TRg-5	0.0629706	0.760981	0.0631836	0.614702
PRE7g7-CRM1-TRg-5	0.0156053	0.154731	0.0152439	0.911871
PRE7g7-CRM1-TRg-2	-0.0521811	-0.712897	-0.0527778	0.510548
PRE7g7-ASK1-TRg-7	-0.145738	-1.91037	-0.143003	0.0803752
PRE7g7-STU2-NRg-4	-0.0016696	-0.066378	-0.000854016	0.978888
PRE7g7-NEO1-NRg-3	-0.0707589	-0.950683	-0.0682011	0.732634
PRE7g7-GAL11-TRg-5	0.0242147	0.264927	0.0238509	0.867607
PRE7g7-GAL11-TRg-7	-0.0628713	-0.849726	-0.0629351	0.446814
PRE7g7-SAM50-NRg-3	-0.00439952	-0.101319	-0.004464	0.874624
PRE7g7-CSL4-TRg-2	-0.0489391	-0.671401	-0.0490595	0.595453
PRE7g7-CCT5-TRg-2	0.0562245	0.674634	0.0563744	0.650203
PRE7g7-POL30-NRg-1	0.00390816	0.00501429	0.00432441	0.996676
PRE7g7-MED4-TRg-4	0.0330461	0.377964	0.0331278	0.584154
PRE7g7-MED4-TRg-3	0.0250031	0.275018	0.0257664	0.818974
PRE7g7-MED4-TRg-2	-0.0211435	-0.315633	-0.0209242	0.842548
PRE7g7-GDI1-TRg-4	0.0609526	0.735151	0.0616366	0.608343
PRE7g7-GDI1-TRg-3	0.0441818	0.520494	0.0446957	0.748075
PRE7g7-REB1-TRg-6	-0.0138161	-0.221846	-0.0123397	0.762974
PRE7g7-MRPL37-NRg-2	0.0160949	0.160998	0.0155427	0.882833
PRE7g7-NOC3-TRg-3	0.0229118	0.24825	0.0232053	0.795162
PRE7g7-SPC97-TRg-3	-0.0334724	-0.473436	-0.0310028	0.57926
PRE7g7-IPP1-TRg-3	0.000353389	-0.0404848	0.000184019	0.984176
PRE7g7-IPP1-TRg-2	0.0475507	0.563614	0.0480779	0.50525
PRE7g7-PTI1-TRg-3	-0.070597	-0.94861	-0.068558	0.615247
PRE7g7-PTI1-TRg-5	0.0378296	0.439189	0.0383473	0.603147
PRE7g7-RFC5-NRg-1	0.0194368	0.203772	0.0189863	0.819763
PRE7g7-CDC24-TRg-1	-0.0468691	-0.644907	-0.0469714	0.64197
PRE7g7-CDC24-TRg-3	0.0656398	0.795144	0.0667279	0.698071
PRE7g7-CDC24-TRg-5	-0.00475468	-0.105865	-0.00322266	0.947423
PRE7g7-CDC24-TRg-6	0.0573587	0.689151	0.0584518	0.37237
PRE7g7-UTP23-TRg-6	-0.0303446	-0.433402	-0.0312586	0.573329
PRE7g7-UTP23-TRg-4	-0.0504137	-0.690276	-0.0502266	0.550416
PRE7g7-UTP23-TRg-1	0.0500156	0.595164	0.050574	0.589463
PRE7g7-RHO3-NRg-4	-0.0734795	-0.985504	-0.0737561	0.227976
PRE7g7-TRS23-NRg-1	0.100257	1.23822	0.101637	0.374836
PRE7g7-TRS23-NRg-3	0.0903641	1.1116	0.0911454	0.474024
PRE7g7-RSP5-TRg-2	0.106346	1.31616	0.106632	0.214857
PRE7g7-RSP5-TRg-1	0.0543132	0.650171	0.0543275	0.442689
PRE7g7-SDA1-NRg-1	-0.0125578	-0.205741	-0.0124625	0.75574
PRE7g7-KAP95-TRg-8	-0.0722184	-0.969363	-0.0718643	0.367195
PRE7g7-ACO1-TRg-6	-0.0781644	-1.04547	-0.0761545	0.686657
PRE7g7-HTA1-NRg-3	-0.0145493	-0.231231	-0.0144699	0.760121
PRE7g7-HTA1-NRg-2	-0.10859	-1.4349	-0.107859	0.29162
PRE7g7-SPN1-TRg-1	0.0245625	0.269378	0.0254333	0.843863
PRE7g7-MOT1-NRg-7	0.00107085	-0.0313017	0.00118435	0.978571
PRE7g7-RPL17A-NRg-4	-0.117297	-1.54634	-0.11723	0.265724
PRE7g7-ADA2-TRg-4	0.00919166	0.0726401	0.00941486	0.90002
PRE7g7-SFH1-NRg-1	-0.0529046	-0.722157	-0.0531384	0.578068
PRE7g7-SPC97-NRg-5	0.00562746	0.0270204	0.00846571	0.947345
PRE7g7-PRP22-TRg-3	-0.0309793	-0.441526	-0.0298553	0.388703
PRE7g7-SEN15-TRg-2	0.0617394	0.745222	0.0618109	0.371884
PRE7g7-RPL3-NRg-2	-0.155429	-2.03441	-0.153424	0.513746
PRE7g7-ISD11-NRg-2	0.100477	1.24104	0.10078	0.293247
PRE7g7-HEM12-TRg-8	-0.0475367	-0.653451	-0.0480068	0.586213
PRE7g7-SEC10-TRg-1	-0.100403	-1.33011	-0.098444	0.381411
PRE7g7-HTB1-TRg-7	0.0280257	0.313706	0.0278172	0.841393
PRE7g7-TTI2-TRg-1	-0.0134779	-0.217518	-0.0129975	0.883055
PRE7g7-ACP1-TRg-2	0.00526395	0.0223676	0.00589331	0.97116
PRE7g7-ACP1-TRg-4	0.00233806	-0.0150821	0.0024989	0.940871
PRE7g7-GAL11-NRg-10	-0.0720155	-0.966767	-0.0717148	0.571773
PRE7g7-UTP22-TRg-2	-0.00839021	-0.152398	-0.00842937	0.927234
PRE7g7-MST1-NRg-5	0.14392	1.79709	0.145195	0.342625
PRE7g7-RIB7-NRg-2	0.0375779	0.435968	0.0377059	0.359235
PRE7g7-MCD1-TRg-6	-0.0984883	-1.3056	-0.098496	0.332295
PRE7g7-MCD1-TRg-5	-0.136128	-1.78737	-0.135791	0.294903
PRE7g7-GPI8-NRg-2	-0.136993	-1.79844	-0.135932	0.517722
PRE7g7-THS1-TRg-2	0.00360766	0.00116801	0.00368337	0.997777
PRE7g7-RRP7-TRg-2	0.00568719	0.0277849	0.00653056	0.842077
PRE7g7-RRP7-TRg-5	0.0280135	0.313549	0.0296548	0.562797
PRE7g7-SMX2-NRg-7	0.0539117	0.645032	0.0535082	0.340004
PRE7g7-RRP45-TRg-5	-0.045499	-0.627369	-0.0443673	0.576493
PRE7g7-RRP45-TRg-4	-0.0472576	-0.649879	-0.0468049	0.392035
PRE7g7-CNS1-TRg-2	0.136198	1.69825	0.136713	0.275451
PRE7g7-FBP1-NRg-9	-0.0830367	-1.10783	-0.0834092	0.409348
PRE7g7-GCD11-NRg-1	-0.00131359	-0.0618212	-0.00120244	0.929497
PRE7g7-RPL10-TRg-2	-0.0415474	-0.576791	-0.0419837	0.327098
PRE7g7-NUP192-TRg-4	0.0371553	0.43056	0.0384066	0.516203
PRE7g7-NUP145-NRg-4	0.0137503	0.130989	0.0134328	0.845932
PRE7g7-HEM12-TRg-6	0.0150869	0.148095	0.0146972	0.95409
PRE7g7-PLC1-TRg-3	-0.0139571	-0.223651	-0.0130262	0.718839
PRE7g7-RPA43-TRg-1	0.0102685	0.0864229	0.00951557	0.938584
PRE7g7-RPB7-NRg-2	-0.0466846	-0.642545	-0.0466388	0.455741
PRE7g7-RPB7-NRg-3	0.0193093	0.202141	0.0206687	0.928662
PRE7g7-NSL1-NRg-1	-0.0418692	-0.580911	-0.0398325	0.737618
PRE7g7-UTP6-TRg-3	-0.0527899	-0.720689	-0.051734	0.584806
PRE7g7-UTP6-TRg-1	0.00765169	0.0529294	0.00830283	0.962816
PRE7g7-YJU2-TRg-5	0.0254141	0.280278	0.0260555	0.884185
PRE7g7-FRS2-NRg-5	-0.0897936	-1.19432	-0.0888012	0.335115
PRE7g7-TIF35-NRg-2	0.0333733	0.382152	0.0338783	0.715909
PRE7g7-GPI15-TRg-1	-0.0501318	-0.686667	-0.0497572	0.359551
PRE7g7-NOP1-NRg-5	-0.00462855	-0.104251	-0.00418268	0.966395
PRE7g7-GPI15-TRg-4	-0.0325504	-0.461635	-0.0325776	0.740346
PRE7g7-COG4-TRg-1	-0.0227678	-0.336423	-0.0211749	0.900884
PRE7g7-TFA1-TRg-1	0.0327627	0.374336	0.0329849	0.744519
PRE7g7-RHO1-NRg-2	-0.159773	-2.09002	-0.158449	0.548954
PRE7g7-RHO1-NRg-1	0.00820048	0.0599535	0.00796611	0.954428
PRE7g7-CDC55-NRg-2	-0.0685885	-0.922903	-0.0689621	0.325983
PRE7g7-IDI1-NRg-7	-0.0365527	-0.512863	-0.0363116	0.637384
PRE7g7-RPL32-TRg-5	-0.102976	-1.36305	-0.104102	0.371507
PRE7g7-RPB5-TRg-4	0.0479421	0.568625	0.0480949	0.631238
PRE7g7-DIP2-TRg-5	-0.0107351	-0.182411	-0.0112944	0.49306
PRE7g7-DIP2-TRg-1	0.0372924	0.432314	0.0385035	0.466311
PRE7g7-RPC40-TRg-2	0.078436	0.958929	0.0777365	0.468464
PRE7g7-CDC6-TRg-5	-0.00826877	-0.150844	-0.0078431	0.923522
PRE7g7-CDC6-TRg-3	-0.0809702	-1.08138	-0.0799032	0.470763
PRE7g7-DAD2-TRg-2	-0.0341694	-0.482358	-0.0327038	0.867227
PRE7g7-RVS161-TRg-2	-0.145702	-1.90991	-0.145951	0.193074
PRE7g7-RVS161-TRg-1	-0.0597151	-0.809328	-0.0590747	0.472728
PRE7g7-SUP45-NRg-3	0.0503623	0.599602	0.0509934	0.322929
PRE7g7-SRB6-NRg-5	-0.0132103	-0.214093	-0.0127089	0.800663
PRE7g7-RPC11-TRg-4	0.0297622	0.335932	0.03041	0.411485
PRE7g7-RKI1-TRg-8	0.00297314	-0.0069535	0.00280734	0.991232
PRE7g7-NIP7-TRg-3	0.0694155	0.843471	0.0696834	0.683345
PRE7g7-RPL33A-NRg-12	0.0321361	0.366316	0.0325877	0.824651
PRE7g7-SAM50-TRg-4	-0.0541873	-0.738575	-0.0548811	0.688657
PRE7g7-NOP4-NRg-1	0.0658275	0.797547	0.0657637	0.275806
PRE7g7-NOP4-NRg-3	0.0932014	1.14792	0.0935269	0.503581
PRE7g7-SMX2-TRg-5	0.0618323	0.746411	0.062632	0.550921
PRE7g7-POL12-NRg-2	0.039276	0.457703	0.0406769	0.709724
PRE7g7-BMS1-NRg-2	-0.00597788	-0.121522	-0.0060687	0.940522
PRE7g7-RPA190-TRg-5	-0.0311064	-0.443152	-0.0311191	0.459844
PRE7g7-ALG14-NRg-4	-0.00211341	-0.0720584	-0.0022907	0.947502
PRE7g7-ALG14-NRg-1	0.040594	0.474573	0.0407535	0.406494
PRE7g7-PRE5-NRg-1	0.100034	1.23537	0.10091	0.410209
PRE7g7-BIG1-NRg-2	0.00424846	0.00936989	0.00442527	0.997684
PRE7g7-TFA2-TRg-4	-0.0253832	-0.369898	-0.0240735	0.823272
PRE7g7-IMP4-TRg-6	-0.0827814	-1.10456	-0.0827751	0.574396
PRE7g7-PAN1-NRg-1	0.112753	1.39816	0.113386	0.405955
PRE7g7-UTP13-TRg-2	0.00403682	0.00666103	0.00448296	0.997696
PRE7g7-KAE1-NRg-3	-0.0190274	-0.288548	-0.0193569	0.851084
PRE7g7-ERG20-TRg-1	0.0206269	0.219005	0.0206568	0.832866
PRE7g7-CDC20-TRg-6	-0.289348	-3.7485	-0.288277	0.186312
PRE7g7-PWP2-NRg-2	0.00166802	-0.0236583	0.00135009	0.976974
PRE7g7-COG1-NRg-1	0.105079	1.29994	0.106618	0.272755
PRE7g7-RPL1B-TRg-4	-0.0992805	-1.31574	-0.0990578	0.38935
PRE7g7-RPL1B-TRg-7	-0.120285	-1.58459	-0.120788	0.454954
PRE7g7-UTP20-TRg-3	-0.07591	-1.01661	-0.0755711	0.405668
PRE7g7-UTP20-TRg-4	-0.0252389	-0.368052	-0.0251349	0.63747
PRE7g7-RPL25-TRg-4	-0.129981	-1.70869	-0.129747	0.43944
PRE7g7-RPL25-TRg-2	-0.128266	-1.68674	-0.128296	0.326915
PRE7g7-MCM7-NRg-1	-0.0245792	-0.359609	-0.0243573	0.839372
PRE7g7-MRP49-TRg-5	0.00996705	0.0825648	0.00928487	0.869366
PRE7g7-ERO1-NRg-3	0.072579	0.883963	0.0740577	0.52065
PRE7g7-UTP5-TRg-7	0.0808989	0.990453	0.0804041	0.331404
PRE7g7-MCM4-NRg-1	0.0104069	0.0881941	0.011588	0.928938
PRE7g7-PRE3-NRg-1	-0.0032126	-0.0861275	-0.00279985	0.9343
PRE7g7-FCF1-NRg-1	-0.014346	-0.228629	-0.0137675	0.791597
PRE7g7-CUS1-NRg-1	-0.00827932	-0.150979	-0.00840319	0.874718
PRE7g7-PSF1-TRg-2	-0.00542448	-0.114438	-0.00607649	0.948756
PRE7g7-BCP1-TRg-2	0.014398	0.139278	0.0142189	0.786225
PRE7g7-PAN1-TRg-1	0.0696446	0.846405	0.0705016	0.567417
PRE7g7-PAN1-TRg-3	0.0563894	0.676744	0.0565777	0.550277
PRE7g7-PAN1-TRg-4	0.101943	1.25981	0.103148	0.61141
PRE7g7-VPS3-TRg-2	0.0316569	0.360183	0.0319761	0.393627
PRE7g7-YIL060W-NRg-1	0.0832948	1.02112	0.0838228	0.564408
PRE7g7-VPS53-NRg-1	0.00540216	0.0241367	0.00603476	0.989903
PRE7g7-CYR1-TRg-4	-0.11103	-1.46613	-0.110589	0.74459
PRE7g7-CYR1-TRg-7	-0.0502847	-0.688624	-0.0499658	0.252896
PRE7g7-MPS1-NRg-1	0.0517301	0.617108	0.0530674	0.59821
PRE7g7-SRP1-TRg-5	-0.110697	-1.46187	-0.109331	0.593376
PRE7g7-SRP1-TRg-4	-0.0603492	-0.817445	-0.0595091	0.675162
PRE7g7-TAF12-TRg-2	-0.124906	-1.64374	-0.123094	0.64203
PRE7g7-TAF12-TRg-3	0.0238625	0.260418	0.0256055	0.885303
PRE7g7-POP4-TRg-1	0.014287	0.137858	0.014765	0.847164
PRE7g7-SPT16-TRg-1	0.0483315	0.573608	0.0485753	0.447983
PRE7g7-NUP82-TRg-4	-0.0632682	-0.854805	-0.0631291	0.619532
PRE7g7-DML1-TRg-3	0.0250041	0.27503	0.0247357	0.824386
PRE7g7-RPA43-NRg-3	0.065298	0.79077	0.0658185	0.595149
PRE7g7-STU2-NRg-3	-0.0773081	-1.03451	-0.0768461	0.297372
PRE7g7-POP4-NRg-4	-0.0173462	-0.26703	-0.0168683	0.81006
PRE7g7-MCD1-TRg-2	-0.0723863	-0.971512	-0.0730517	0.414644
PRE7g7-RPS3-NRg-4	-0.112574	-1.4859	-0.111954	0.403349
PRE7g7-PRP9-TRg-4	0.0811404	0.993544	0.0811959	0.584154
PRE7g7-RPP1-NRg-2	0.039763	0.463937	0.0395632	0.581521
PRE7g7-MTR2-NRg-11	0.0227788	0.246548	0.0222562	0.902426
PRE7g7-GCD11-TRg-1	-0.0414565	-0.575628	-0.0412846	0.644497
PRE7g7-RPF1-TRg-3	0.00189377	-0.0207688	0.00230859	0.992595
PRE7g7-SUB2-NRg-4	0.00211331	-0.0179588	0.00216747	0.987993
PRE7g7-GPI15-TRg-3	-0.0216403	-0.321991	-0.0214089	0.794651
PRE7g7-ERG9-TRg-6	0.0100079	0.0830877	0.0103303	0.922939
PRE7g7-RPT2-NRg-1	-0.0640021	-0.864199	-0.0634883	0.718245
PRE7g7-YOS1-NRg-3	-0.0414037	-0.574953	-0.0407568	0.755836
PRE7g7-SCM3-TRg-4	0.0283742	0.318165	0.0285382	0.648166
PRE7g7-SCM3-TRg-6	0.0204732	0.217038	0.0211034	0.90002
PRE7g7-RLP7-NRg-1	-0.00939546	-0.165265	-0.00932696	0.930073
PRE7g7-TFB2-NRg-4	0.0288506	0.324264	0.0293172	0.406137
PRE7g7-IMP4-TRg-1	-0.0145564	-0.231322	-0.0147489	0.733073
PRE7g7-IMP4-TRg-3	-0.0427328	-0.591964	-0.0432422	0.605186
PRE7g7-PRE4-TRg-3	0.0391323	0.455864	0.0394469	0.822151
PRE7g7-SUB2-TRg-3	0.043913	0.517053	0.045606	0.415041
PRE7g7-RPP0-NRg-4	-0.0277891	-0.400694	-0.026848	0.731219
PRE7g7-RPP0-NRg-3	-0.0722002	-0.969131	-0.0725939	0.317428
PRE7g7-TOM40-TRg-4	-0.0240313	-0.352596	-0.0236896	0.729614
PRE7g7-FUR1-NRg-12	-0.00399243	-0.0961089	-0.00440382	0.949053
PRE7g7-TOM40-TRg-2	0.00092498	-0.0331688	0.00143631	0.954308
PRE7g7-VMA11-NRg-4	-0.0288221	-0.413915	-0.0289998	0.460432
PRE7g7-PGS1-NRg-4	-0.097536	-1.29341	-0.0975436	0.624548
PRE7g7-URB1-TRg-4	0.0310049	0.351837	0.0312545	0.614183
PRE7g7-ARP4-TRg-3	0.0410731	0.480704	0.0414747	0.701306
PRE7g7-RPT3-TRg-3	-0.156464	-2.04766	-0.155627	0.354663
PRE7g7-SUI3-TRg-3	0.0363668	0.420467	0.0368205	0.473829
PRE7g7-RFC5-NRg-2	NA	NA	NA	NA
PRE7g7-RRP14-TRg-2	0.0479305	0.568476	0.0491102	0.558287
PRE7g7-SCC2-TRg-1	-0.1095	-1.44654	-0.108343	0.399738
PRE7g7-SSC1-TRg-3	-0.0480377	-0.659864	-0.0471725	0.639168
PRE7g7-RRP9-TRg-3	-0.0087634	-0.157175	-0.00891699	0.874907
PRE7g7-MOT1-NRg-9	-0.0174349	-0.268165	-0.0172238	0.8768
PRE7g7-RPL42A-NRg-2	-0.0366527	-0.514142	-0.0369523	0.50831
PRE7g7-SEC16-TRg-7	-0.0319605	-0.454084	-0.0305995	0.666649
PRE7g7-IMP4-NRg-2	-0.0262454	-0.380934	-0.0261826	0.538561
PRE7g7-YEF3-NRg-4	-0.00397101	-0.0958348	-0.00299982	0.780966
PRE7g7-PUP1-TRg-1	0.00503761	0.0194706	0.00501555	0.991975
PRE7g7-UTP22-TRg-6	-0.0188035	-0.285683	-0.0193276	0.873905
PRE7g7-DBP2-NRg-4	0.0236492	0.257688	0.0234663	0.778929
PRE7g7-PRE2-TRg-7	0.0126866	0.117374	0.0134776	0.862472
PRE7g7-ATP16-TRg-6	0.0836337	1.02546	0.0835843	0.343261
PRE7g7-UTP13-TRg-4	0.0336582	0.385798	0.0343263	0.82875
PRE7g7-DOP1-NRg-4	0.110827	1.37352	0.112284	0.251617
PRE7g7-TIM44-TRg-3	0.014957	0.146433	0.0145652	0.834197
PRE7g7-ATP16-TRg-2	0.0384342	0.446929	0.0386857	0.68635
PRE7g7-ENP1-NRg-3	-0.0470495	-0.647215	-0.0470026	0.550434
PRE7g7-NAF1-TRg-3	0.0342465	0.393328	0.0336645	0.870778
PRE7g7-COG4-TRg-2	-0.0175501	-0.269639	-0.0167848	0.607185
PRE7g7-SOG2-TRg-7	-0.0790326	-1.05658	-0.0779299	0.504046
PRE7g7-YDR341C-TRg-3	0.0214072	0.228992	0.0219855	0.903063
PRE7g7-YMR290W-A-TRg-10	0.00326177	-0.00325912	0.00275116	0.942891
PRE7g7-NUP192-NRg-9	-0.00764874	-0.142908	-0.00741587	0.948724
PRE7g7-RPS31-NRg-8	-0.0649531	-0.876372	-0.0638756	0.410705
PRE7g7-SPC97-NRg-6	NA	NA	NA	NA
PRE7g7-EBP2-NRg-1	0.0127874	0.118664	0.0125075	0.936893
PRE7g7-CDC48-TRg-5	-0.0519336	-0.709729	-0.0511878	0.570914
PRE7g7-RPT1-TRg-4	0.0152908	0.150705	0.016267	0.961942
PRE7g7-ULP1-NRg-2	-0.129152	-1.69808	-0.129168	0.376364
PRE7g7-RPN3-TRg-6	0.0442292	0.521102	0.0458277	0.76464
PRE7g7-RPT1-TRg-5	0.0573566	0.689125	0.0584767	0.614974
PRE7g7-KRE5-TRg-2	-0.00373549	-0.0928202	-0.00379396	0.834197
PRE7g7-TBF1-NRg-8	0.0449546	0.530385	0.0446119	0.366144
PRE7g7-UTP22-NRg-4	0.00905808	0.0709304	0.00883597	0.933023
PRE7g7-SSC1-NRg-4	0.00733546	0.0488818	0.00719893	0.9323
PRE7g7-REB1-TRg-4	0.108399	1.34244	0.109201	0.364908
PRE7g7-CDC48-NRg-9	-0.0945566	-1.25528	-0.0941214	0.342284
PRE7g7-FAS2-TRg-8	0.0406977	0.4759	0.041979	0.622939
PRE7g7-TAO3-TRg-8	0.0167226	0.169032	0.0172559	0.912636
PRE7g7-CKS1-TRg-5	-0.14477	-1.89799	-0.143832	0.283733
PRE7g7-YLR379W-TRg-7	0.0701715	0.853148	0.0702055	0.231487
PRE7g7-TEN1-NRg-2	0.0399272	0.466038	0.0416188	0.871078
PRE7g7-RPL42A-TRg-2	-0.0394749	-0.550265	-0.0395926	0.576003
PRE7g7-SEC27-TRg-4	-0.00100073	-0.0578168	0.00138002	0.988236
PRE7g7-TBF1-NRg-4	0.123903	1.54089	0.124486	0.41529
PRE7g7-RPT1-NRg-6	0.0447506	0.527775	0.0458473	0.461978
PRE7g7-COG1-TRg-3	-0.0179367	-0.274588	-0.015957	0.925586
PRE7g7-SUI1-TRg-6	-0.00947929	-0.166338	-0.00976148	0.881915
PRE7g7-TIM23-TRg-6	-0.0694314	-0.933691	-0.0693089	0.388085
PRE7g7-CDC48-NRg-6	0.0933286	1.14955	0.0937464	0.525839
PRE7g7-EPL1-TRg-5	0.118732	1.47469	0.120418	0.284848
PRE7g7-RPT5-TRg-8	0.0996721	1.23074	0.100763	0.491584
PRE7g7-ATP16-NRg-4	0.0935888	1.15288	0.0936325	0.433703
PRE7g7-RPN6-TRg-3	-0.0802343	-1.07196	-0.0794353	0.480036
PRE7g7-ERG9-NRg-6	-0.00739594	-0.139672	-0.00724104	0.724753
PRE7g7-SMX3-TRg-1	0.014597	0.141825	0.0148015	0.907044
PRE7g7-NCB2-NRg-3	0.00423151	0.00915303	0.00470383	0.990079
PRE7g7-SEC16-NRg-12	-0.0360472	-0.506392	-0.0345666	0.849032
PRE7g7-RPN6-TRg-2	0.0339561	0.389611	0.0338399	0.833467
PRE7g7-REB1-NRg-4	0.154244	1.92923	0.155001	0.345954
PRE7g7-ATP16-TRg-9	0.201836	2.53838	0.201524	0.369504
PRE7g7-ERG9-NRg-7	-0.0332973	-0.471195	-0.0325268	0.794867
PRE4g9-RPL15A-NRg-4	-0.046804	-0.644074	-0.0484167	0.777793
PRE4g9-RPL15A-NRg-5	0.0141611	0.136246	0.0134825	0.93339
PRE4g9-KRE33-TRg-1	0.0525211	0.627233	0.0532911	0.660969
PRE4g9-PMI40-NRg-1	0.0368536	0.426698	0.0384266	0.671265
PRE4g9-NOP19-NRg-3	-0.0257333	-0.37438	-0.0246129	0.772872
PRE4g9-SRP14-NRg-4	0.0561334	0.673468	0.0563338	0.501952
PRE4g9-SEC27-TRg-2	0.0225671	0.243839	0.0190676	0.821155
PRE4g9-GPI14-TRg-3	0.0119871	0.10842	0.013768	0.902597
PRE4g9-PAH1-TRg-7	-0.031667	-0.450327	-0.0328405	0.606746
PRE4g9-PAH1-TRg-6	0.0438494	0.516239	0.0426927	0.684561
PRE4g9-PAH1-TRg-5	0.0557777	0.668916	0.0549372	0.377489
PRE4g9-PAH1-TRg-3	-0.0505176	-0.691605	-0.0509007	0.544145
PRE4g9-COG3-TRg-1	0.00747878	0.0507162	0.00743428	0.934338
PRE4g9-HTS1-NRg-5	0.0608279	0.733555	0.0621287	0.637181
PRE4g9-MSN5-TRg-7	NA	NA	NA	NA
PRE4g9-ERG26-TRg-1	-0.0413384	-0.574116	-0.040894	0.827809
PRE4g9-SMD2-TRg-5	0.000856301	-0.0340478	0.0028453	0.987856
PRE4g9-SMD2-TRg-4	0.0167008	0.168753	0.0188018	0.608371
PRE4g9-SMD2-TRg-1	-0.00134128	-0.0621756	0.000136979	0.802105
PRE4g9-PRE7-TRg-4	-0.0160249	-0.250118	-0.0177463	0.923885
PRE4g9-PRE7-TRg-7	-0.0114901	-0.192074	-0.0106034	0.842121
PRE4g9-SEC6-TRg-3	0.00694654	0.0439038	0.00658385	0.984524
PRE4g9-ESF2-NRg-1	0.0425096	0.499091	0.0432333	0.633982
PRE4g9-ESF2-NRg-3	0.0297569	0.335864	0.0301109	0.688152
PRE4g9-AFG2-TRg-2	-0.0223132	-0.330605	-0.0204969	0.682424
PRE4g9-RRP36-TRg-3	0.0178783	0.183824	0.0172774	0.910363
PRE4g9-RRP36-TRg-5	-0.0104031	-0.178162	-0.0097811	0.746874
PRE4g9-GCR1-NRg-2	-0.0337758	-0.477319	-0.0327059	0.666794
PRE4g9-PRE4-NRg-4	-0.0539937	-0.736097	-0.0552279	0.298391
PRE4g9-PRE4-NRg-9	-0.0111784	-0.188086	-0.0102375	0.729873
PRE4g9-DSN1-NRg-2	-0.0488384	-0.670112	-0.0474298	0.64927
PRE4g9-GPI11-TRg-3	0.0453307	0.5352	0.0453175	0.7185
PRE4g9-POP3-TRg-1	-0.0252392	-0.368056	-0.0236496	0.579704
PRE4g9-MNE1-TRg-5	-0.0472806	-0.650174	-0.0485423	0.613719
PRE4g9-RRP12-NRg-1	-0.0103574	-0.177576	-0.00928213	0.907192
PRE4g9-RSC6-TRg-2	0.0198173	0.208642	0.0195828	0.518072
PRE4g9-CDC25-TRg-1	-0.00279779	-0.0808181	-0.0036766	0.920262
PRE4g9-CDC25-TRg-9	-0.0194226	-0.293607	-0.0217246	0.872906
PRE4g9-YPP1-NRg-3	0.0121454	0.110446	0.0117915	0.955168
PRE4g9-NFS1-NRg-9	0.000656845	-0.0366007	0.000875256	0.943208
PRE4g9-NFS1-NRg-8	0.00226876	-0.0159691	0.00268453	0.983619
PRE4g9-UBA2-TRg-1	0.0224158	0.241901	0.0239688	0.818813
PRE4g9-ARP2-NRg-3	-0.0327414	-0.464079	-0.0362059	0.722124
PRE4g9-MAK16-TRg-1	0.017557	0.179712	0.017445	0.652945
PRE4g9-CEP3-NRg-1	-0.00209685	-0.0718465	-0.00293189	0.916232
PRE4g9-GUK1-TRg-5	-0.0215165	-0.320407	-0.0201597	0.770822
PRE4g9-GUK1-TRg-2	0.0212291	0.226713	0.0219921	0.865255
PRE4g9-GPI12-NRg-6	-0.0178774	-0.273829	-0.0181165	0.781846
PRE4g9-RPS5-NRg-5	-0.0461435	-0.635619	-0.046235	0.477899
PRE4g9-RPS5-NRg-2	-0.0556869	-0.757769	-0.0543773	0.668721
PRE4g9-RPC19-NRg-1	0.0113048	0.0996875	0.0118389	0.92432
PRE4g9-TIM54-TRg-1	-0.0320907	-0.455751	-0.0301037	0.687695
PRE4g9-TEN1-TRg-2	0.0678255	0.823121	0.0674258	0.520246
PRE4g9-SAH1-NRg-4	-0.00245399	-0.0764177	-0.00221369	0.790473
PRE4g9-SAH1-NRg-5	0.0265899	0.295329	0.0265411	0.812315
PRE4g9-SAH1-NRg-3	-0.0619747	-0.83825	-0.0617292	0.364871
PRE4g9-ATP15-NRg-5	0.0189466	0.197498	0.0180356	0.929497
PRE4g9-SCD5-TRg-5	0.0476995	0.565519	0.0471295	0.419524
PRE4g9-ARB1-NRg-2	0.0463276	0.547959	0.0475627	0.378286
PRE4g9-ARB1-NRg-4	0.02845	0.319136	0.0303079	0.690159
PRE4g9-PUP2-TRg-1	0.0491874	0.584563	0.0488888	0.735022
PRE4g9-CCT8-TRg-2	NA	NA	NA	NA
PRE4g9-MCM4-TRg-1	-0.0605172	-0.819594	-0.0611677	0.180326
PRE4g9-LSM4-TRg-1	-0.0249862	-0.364817	-0.0228704	0.790546
PRE4g9-NOP53-NRg-1	0.0611373	0.737516	0.0606337	0.693702
PRE4g9-ATP3-TRg-4	0.0029503	-0.00724584	0.003564	0.997333
PRE4g9-AFG2-NRg-3	0.00353725	0.000266867	0.00576803	0.948906
PRE4g9-PRO3-NRg-3	-0.0631722	-0.853577	-0.0613651	0.28165
PRE4g9-NRD1-NRg-10	0.00860526	0.0651346	0.00750809	0.950767
PRE4g9-SEC61-TRg-2	-0.0137048	-0.220422	-0.0122806	0.807317
PRE4g9-RHO3-TRg-4	-0.0603158	-0.817017	-0.0588203	0.531571
PRE4g9-SNF2-TRg-6	-0.0653405	-0.88133	-0.0633917	0.631176
PRE4g9-SMD2-NRg-3	0.000730639	-0.0356562	0.00147541	0.912933
PRE4g9-RSC4-TRg-2	0.0410443	0.480337	0.0417758	0.798542
PRE4g9-RSC4-TRg-1	-0.0652383	-0.880022	-0.0661575	0.690159
PRE4g9-TIF34-TRg-2	-0.0556734	-0.757597	-0.0577969	0.33564
PRE4g9-BET1-NRg-1	-0.0260159	-0.377997	-0.0270331	0.600735
PRE4g9-CDC8-NRg-2	-0.0627166	-0.847746	-0.0607027	0.525294
PRE4g9-PRP42-TRg-2	0.0657424	0.796458	0.066781	0.152379
PRE4g9-RRB1-TRg-2	-0.0322466	-0.457746	-0.0303512	0.592469
PRE4g9-SPC24-TRg-1	0.0625961	0.756187	0.0625018	0.17972
PRE4g9-ILS1-NRg-1	0.0109152	0.094701	0.0120194	0.911687
PRE4g9-GFA1-TRg-2	-0.0330639	-0.468208	-0.0324546	0.74557
PRE4g9-SEC21-NRg-10	0.0530007	0.633371	0.0522221	0.501942
PRE4g9-RPC10-NRg-1	-0.00481652	-0.106657	-0.00579813	0.855128
PRE4g9-RPB10-TRg-3	0.00174172	-0.022715	0.00160932	0.946722
PRE4g9-RPB10-TRg-2	0.0423382	0.496898	0.0428622	0.7775
PRE4g9-YNL181W-TRg-1	-0.0539393	-0.735401	-0.0534816	0.599612
PRE4g9-RAD3-NRg-1	-0.000478539	-0.051133	0.00125024	0.98013
PRE4g9-NOP10-TRg-1	0.0144626	0.140105	0.0148889	0.944114
PRE4g9-BFR2-TRg-3	0.0242653	0.265574	0.0246649	0.833286
PRE4g9-MCM2-TRg-6	-0.0508397	-0.695728	-0.0491676	0.559585
PRE4g9-MCM2-TRg-4	-0.0375491	-0.525616	-0.0360514	0.349982
PRE4g9-MPP10-TRg-1	-0.00546339	-0.114936	-0.00580361	0.876636
PRE4g9-RET2-TRg-4	-0.0147161	-0.233366	-0.0163113	0.749932
PRE4g9-RET2-TRg-1	0.0388515	0.452269	0.0372924	0.257129
PRE4g9-RPS2-NRg-1	-0.0756777	-1.01364	-0.0765455	0.359235
PRE4g9-RPS2-NRg-2	-0.00152086	-0.0644741	-0.00281219	0.955238
PRE4g9-ORC4-NRg-3	0.00720207	0.0471745	0.00845633	0.966348
PRE4g9-TIP20-TRg-7	-0.0417731	-0.57968	-0.0403651	0.368939
PRE4g9-SMT3-TRg-1	-0.0592947	-0.803948	-0.0581075	0.280354
PRE4g9-MSS18-NRg-6	-0.00446174	-0.102116	-0.00294021	0.859034
PRE4g9-YEF3-NRg-9	-0.0672968	-0.906369	-0.0710354	0.387396
PRE4g9-ASK1-NRg-1	-0.013452	-0.217187	-0.0125771	0.822394
PRE4g9-SMC1-TRg-1	-0.100244	-1.32808	-0.100489	0.27705
PRE4g9-NIP1-NRg-1	-0.0236272	-0.347422	-0.0225749	0.562533
PRE4g9-RPP1-NRg-1	0.00270088	-0.0104383	0.00375571	0.990598
PRE4g9-YDJ1-TRg-6	0.00762092	0.0525355	0.00743281	0.899865
PRE4g9-SUB2-NRg-1	-0.102458	-1.35642	-0.101215	0.271482
PRE4g9-TIM10-NRg-8	-0.0183196	-0.279489	-0.0173389	0.835134
PRE4g9-TIM10-NRg-4	0.00129441	-0.0284403	0.00237353	0.929167
PRE4g9-TIM10-NRg-7	-0.0640239	-0.864478	-0.0631499	0.225233
PRE4g9-SKI6-TRg-4	-0.0135819	-0.218849	-0.0127644	0.870067
PRE4g9-TUB4-TRg-1	-0.0165937	-0.257398	-0.0156153	0.885793
PRE4g9-CDC37-NRg-2	0.0240342	0.262616	0.0248183	0.578563
PRE4g9-ISD11-TRg-3	-0.0691097	-0.929574	-0.0680446	0.69975
PRE4g9-YOS1-TRg-4	-0.00897761	-0.159916	-0.00750361	0.961259
PRE4g9-SSC1-TRg-6	0.00584014	0.0297425	0.00575737	0.990283
PRE4g9-MTR3-TRg-5	0.0163652	0.164458	0.0171089	0.93234
PRE4g9-MTR3-TRg-6	-0.118186	-1.55772	-0.116412	0.292873
PRE4g9-TFA1-TRg-2	0.101895	1.25919	0.102324	0.349982
PRE4g9-CDC3-NRg-3	0.0392141	0.45691	0.0397691	0.63656
PRE4g9-ERG25-TA-18	-0.0947207	-1.25738	-0.095135	0.287996
PRE4g9-RPB11-TRg-4	-0.0501673	-0.687121	-0.0491361	0.363832
PRE4g9-RPB11-TRg-1	-0.0637518	-0.860995	-0.0654039	0.757509
PRE4g9-RPB11-TRg-2	0.0370493	0.429203	0.0363717	0.762431
PRE4g9-DED1-TRg-3	0.0170828	0.173642	0.0175686	0.923404
PRE4g9-DED1-TRg-1	0.0151714	0.149177	0.016306	0.710095
PRE4g9-DED1-TRg-6	0.0463134	0.547778	0.0464229	0.552431
PRE4g9-DED1-TRg-4	0.0360224	0.416059	0.0361163	0.638359
PRE4g9-RPL10-NRg-5	0.00812708	0.0590141	0.00910859	0.966271
PRE4g9-RPL10-NRg-4	0.00286065	-0.00839328	0.00423585	0.996638
PRE4g9-EFB1-NRg-1	0.00336422	-0.00194788	0.00430363	0.998457
PRE4g9-EFB1-NRg-5	0.0789682	0.965741	0.0803691	0.428216
PRE4g9-EFB1-NRg-4	0.0433754	0.510172	0.0438431	0.675162
PRE4g9-RPT3-NRg-1	-0.0118143	-0.196224	-0.0116994	0.442097
PRE4g9-SAC6-TRg-8	-0.0380882	-0.532516	-0.0366766	0.716872
PRE4g9-SAC6-TRg-4	-0.0782132	-1.04609	-0.0765255	0.321321
PRE4g9-SAC6-TRg-5	-0.0756978	-1.0139	-0.074476	0.492844
PRE4g9-SAC6-TRg-3	-0.049297	-0.675982	-0.0474144	0.588552
PRE4g9-DIM1-TRg-5	0.0262844	0.291418	0.0270498	0.916091
PRE4g9-DIM1-TRg-7	0.0673854	0.817487	0.0689012	0.659687
PRE4g9-RPC17-NRg-1	0.0155134	0.153555	0.016248	0.865755
PRE4g9-RPC17-NRg-2	0.0267931	0.297928	0.0268291	0.258339
PRE4g9-YDR341C-TRg-1	-0.0166684	-0.258354	-0.0177268	0.87148
PRE4g9-RAP1-NRg-8	-0.0204341	-0.306553	-0.0178696	0.275451
PRE4g9-RAP1-NRg-5	-0.00337303	-0.0881809	-0.00390915	0.967697
PRE4g9-RAP1-NRg-2	0.0173748	0.17738	0.019014	0.818512
PRE4g9-SEC26-NRg-3	0.0776728	0.949161	0.0786895	0.404257
PRE4g9-SPP41-TRg-3	0.00903931	0.0706901	0.00828483	0.925728
PRE4g9-TAP42-NRg-1	0.0170461	0.173173	0.0186505	0.886064
PRE4g9-PGA2-TRg-6	-0.0738327	-0.990026	-0.0721743	0.420021
PRE4g9-BRL1-TRg-1	0.028377	0.318202	0.0269284	0.738814
PRE4g9-FOL2-TRg-1	-0.0506477	-0.693271	-0.048538	0.528481
PRE4g9-NAB3-NRg-5	-0.0182074	-0.278053	-0.0168919	0.764379
PRE4g9-SNF4-TRg-4	0.0149856	0.1468	0.0137291	0.909068
PRE4g9-HRR25-TRg-2	0.0620934	0.749752	0.0610139	0.286568
PRE4g9-TRS23-TRg-4	-0.0574729	-0.78063	-0.0588209	0.350633
PRE4g9-CTR86-TRg-4	-0.0503306	-0.689212	-0.0489488	0.550277
PRE4g9-RPB5-TRg-5	0.028946	0.325485	0.0270048	0.753275
PRE4g9-SPN1-NRg-2	-0.0191263	-0.289815	-0.0206701	0.846914
PRE4g9-SPN1-NRg-1	0.0397111	0.463273	0.0382413	0.555388
PRE4g9-SEC61-NRg-1	0.0137219	0.130625	0.0145125	0.958656
PRE4g9-SEC61-NRg-7	0.0612872	0.739434	0.0623361	0.510234
PRE4g9-TUS1-TRg-3	-0.00200224	-0.0706356	-0.00120834	0.757301
PRE4g9-OLE1-NRg-2	-0.0486487	-0.667684	-0.0492727	0.57727
PRE4g9-AFG2-TRg-1	0.0295795	0.333594	0.0290987	0.804371
PRE4g9-TOA2-NRg-1	0.0310802	0.352802	0.0306762	0.456514
PRE4g9-USO1-TRg-1	-0.01205	-0.199242	-0.0132745	0.922895
PRE4g9-UTP22-NRg-2	0.057711	0.693661	0.0583265	0.513746
PRE4g9-RIB1-TRg-3	0.0128111	0.118967	0.0126465	0.931819
PRE4g9-RIB1-TRg-7	-0.0200746	-0.301952	-0.0203512	0.753609
PRE4g9-RIB1-TRg-4	-0.080466	-1.07493	-0.0804243	0.466971
PRE4g9-COG1-TRg-1	-0.0914569	-1.21561	-0.0936944	0.540161
PRE4g9-RPL32-NRg-2	0.0088035	0.0676719	0.00871483	0.955857
PRE4g9-GLC7-NRg-3	-0.0587768	-0.797318	-0.0577162	0.682515
PRE4g9-GLC7-NRg-4	-0.00823769	-0.150446	-0.00887396	0.912462
PRE4g9-HSF1-TRg-2	0.0634791	0.767489	0.0646468	0.325037
PRE4g9-DAM1-NRg-5	0.0679682	0.824947	0.069078	0.539654
PRE4g9-SEC18-TRg-4	0.00617033	0.0339688	0.00594321	0.989903
PRE4g9-SEC18-TRg-5	0.0194884	0.204433	0.0191814	0.811975
PRE4g9-PAB1-NRg-3	0.00518268	0.0213275	0.00473153	0.990001
PRE4g9-POP8-TRg-2	-0.0105596	-0.180165	-0.00993908	0.30954
PRE4g9-PAB1-NRg-4	0.0704636	0.856887	0.069439	0.296794
PRE4g9-BIG1-TRg-4	0.0207383	0.220431	0.0202188	0.688443
PRE4g9-BIG1-TRg-5	-0.0480745	-0.660335	-0.0478921	0.63434
PRE4g9-BIG1-TRg-6	-0.0560644	-0.762602	-0.055805	0.417138
PRE4g9-RPO41-NRg-1	0.0332854	0.381026	0.033892	0.534893
PRE4g9-RVB2-NRg-2	-0.0801274	-1.07059	-0.0787551	0.437952
PRE4g9-PET117-NRg-8	0.00664305	0.0400193	0.00558462	0.994739
PRE4g9-VPS45-NRg-9	-0.101946	-1.34986	-0.101999	0.370276
PRE4g9-YCG1-NRg-1	-0.000753406	-0.0546512	-0.000816925	0.931268
PRE4g9-NOC4-NRg-1	0.0521499	0.622482	0.0530822	0.286244
PRE4g9-NMD3-NRg-2	-0.0175251	-0.26932	-0.0157326	0.740029
PRE4g9-DRS1-TRg-2	0.00106055	-0.0314335	0.00254723	0.983612
PRE4g9-HTB1-NRg-2	0.0110687	0.0966658	0.0113307	0.929963
PRE4g9-IPI1-TRg-2	-0.00961781	-0.168111	-0.00950989	0.844109
PRE4g9-SEC18-NRg-1	0.0636811	0.770075	0.0608714	0.557017
PRE4g9-SEC18-NRg-2	0.121385	1.50865	0.119069	0.51003
PRE4g9-JIP5-NRg-2	0.0115697	0.103077	0.0137864	0.847306
PRE4g9-YPT1-TRg-3	-0.0592818	-0.803781	-0.0614979	0.196712
PRE4g9-YPT1-TRg-2	-0.0803554	-1.07351	-0.0836549	0.477899
PRE4g9-CLF1-NRg-2	0.0409446	0.47906	0.0411711	0.600144
PRE4g9-SNF2-NRg-7	0.00834029	0.061743	0.0103478	0.877612
PRE4g9-SNF2-NRg-4	-0.0460514	-0.63444	-0.0435775	0.557623
PRE4g9-RPL25-NRg-1	-0.00289821	-0.0821035	-0.00477162	0.934036
PRE4g9-NOP56-TRg-1	0.0688824	0.836649	0.0709084	0.399116
PRE4g9-NOP56-TRg-2	0.0192888	0.201878	0.0207986	0.818838
PRE4g9-TRS31-TRg-1	-0.0698654	-0.939247	-0.0718543	0.463538
PRE4g9-DBF4-TRg-2	0.0569958	0.684506	0.0554949	0.685208
PRE4g9-DBF4-TRg-1	0.00864831	0.0656856	0.00818499	0.963355
PRE4g9-RPC19-TRg-4	0.0594383	0.71577	0.060177	0.514126
PRE4g9-RPC19-TRg-6	0.0348268	0.400756	0.0354334	0.332607
PRE4g9-RPC19-TRg-3	0.0689455	0.837456	0.0688452	0.443569
PRE4g9-ROK1-NRg-1	-0.00988423	-0.171521	-0.00934526	0.932396
PRE4g9-CDC33-TRg-4	0.0273927	0.305604	0.0286745	0.524012
PRE4g9-DHR2-TRg-3	0.0274935	0.306893	0.0278298	0.749159
PRE4g9-RRP42-NRg-5	-0.126024	-1.65805	-0.124562	0.181354
PRE4g9-CLF1-TRg-1	0.101278	1.25129	0.100832	0.261214
PRE4g9-ERG11-NA-16	-0.0939963	-1.24811	-0.0935857	0.301483
PRE4g9-VAS1-NRg-4	0.129146	1.60798	0.128427	0.324656
PRE4g9-PIK1-NRg-2	0.0387289	0.4507	0.0390267	0.725296
PRE4g9-SAR1-NRg-7	-0.0704725	-0.947016	-0.0706263	0.336714
PRE4g9-SAR1-NRg-4	0.0113912	0.100793	0.00982228	0.906831
PRE4g9-RPS3-TRg-1	-0.0428776	-0.593818	-0.0442593	0.546834
PRE4g9-YTM1-TRg-2	0.0455495	0.538001	0.0466081	0.734949
PRE4g9-SUI3-NRg-5	-0.0548827	-0.747476	-0.0539784	0.605449
PRE4g9-SUI3-NRg-2	0.0292396	0.329243	0.0308541	0.417419
PRE4g9-RRP7-TRg-4	0.0192893	0.201884	0.0206359	0.409376
PRE4g9-RRP7-TRg-6	0.0109192	0.0947523	0.0106147	0.890656
PRE4g9-NIP7-TRg-2	0.0551561	0.66096	0.0560556	0.421563
PRE4g9-MDM35-TRg-1	-0.0254465	-0.370709	-0.0249651	0.471968
PRE4g9-ALA1-NRg-1	0.0496189	0.590087	0.0511961	0.548723
PRE4g9-DOA4-NRg-2	0.0072954	0.0483691	0.00851993	0.958839
PRE4g9-RPS13-NRg-1	-0.0733882	-0.984337	-0.0745633	0.341885
PRE4g9-YSF3-TRg-2	0.00855767	0.0645255	0.010353	0.913595
PRE4g9-RPS2-NRg-11	-0.0741084	-0.993554	-0.0749498	0.510133
PRE4g9-SSL1-TRg-10	0.0274351	0.306147	0.0283279	0.578382
PRE4g9-NIP7-TRg-1	0.0395813	0.46161	0.0408935	0.342579
PRE4g9-LST8-NRg-1	-0.0804184	-1.07432	-0.0819864	0.595748
PRE4g9-TAF4-TRg-3	0.0595856	0.717655	0.057166	0.375803
PRE4g9-HAS1-TRg-2	0.0941381	1.15991	0.0936122	0.343008
PRE4g9-GLC7-TRg-2	-0.196474	-2.55976	-0.201062	0.262779
PRE4g9-CDC45-NRg-1	-0.0134387	-0.217016	-0.013973	0.912579
PRE4g9-SEC22-NRg-8	0.0685966	0.83299	0.0681301	0.470306
PRE4g9-YOS1-TRg-2	0.0199142	0.209883	0.019993	0.876959
PRE4g9-RBA50-TRg-3	-0.0497417	-0.681674	-0.0480874	0.582897
PRE4g9-SPP41-NRg-2	0.0419177	0.491515	0.042463	0.584438
PRE4g9-PRP46-TRg-2	0.0324868	0.370806	0.0339384	0.292138
PRE4g9-PGA2-NRg-1	0.0185443	0.192348	0.0200436	0.90525
PRE4g9-CBF5-TRg-3	0.0140659	0.135028	0.0157446	0.904193
PRE4g9-TCP1-NRg-3	0.0628933	0.759991	0.0633069	0.495496
PRE4g9-TCP1-NRg-2	0.0400314	0.467372	0.0403355	0.772314
PRE4g9-ERG26-NRg-2	-0.0578662	-0.785663	-0.058344	0.805385
PRE4g9-ERG26-NRg-4	-0.0567056	-0.770808	-0.0569824	0.572947
PRE4g9-MES1-TRg-5	0.0132374	0.124424	0.0146622	0.934258
PRE4g9-HTS1-TRg-2	0.0467742	0.553676	0.0478804	0.620973
PRE4g9-SSS1-TRg-3	0.0239838	0.261972	0.0237975	0.679138
PRE4g9-SSS1-TRg-2	0.0496489	0.59047	0.0493034	0.573059
PRE4g9-SYS1-TRg-7	-0.0476224	-0.654548	-0.0484061	0.634346
PRE4g9-SYS1-TRg-2	0.0551603	0.661013	0.053541	0.641682
PRE4g9-SYS1-TRg-1	-0.0595805	-0.807605	-0.0613897	0.587223
PRE4g9-BFR2-TRg-1	0.0578209	0.695068	0.0583545	0.415225
PRE4g9-EOS1-TRg-3	0.0188986	0.196883	0.0189693	0.603593
PRE4g9-TAF4-NRg-1	0.0272099	0.303263	0.0256814	0.884479
PRE4g9-ARL3-NRg-8	0.0782032	0.955949	0.0787437	0.330646
PRE4g9-RPN5-NRg-1	0.0519411	0.619809	0.0529877	0.348752
PRE4g9-TIM9-NRg-2	-0.0161806	-0.252111	-0.0148997	0.760441
PRE4g9-NUP57-NRg-3	0.0276977	0.309507	0.027	0.493488
PRE4g9-VPS4-TRg-1	0.0393264	0.458349	0.0393494	0.838814
PRE4g9-CDC3-TRg-4	-0.0223012	-0.330451	-0.0211931	0.618643
PRE4g9-BBP1-NRg-1	-0.053082	-0.724428	-0.052539	0.288781
PRE4g9-BBP1-NRg-2	-0.0430623	-0.596181	-0.0435741	0.50042
PRE4g9-USE1-NRg-3	0.0227389	0.246038	0.0228011	0.627451
PRE4g9-CCT7-TRg-1	-0.0174954	-0.26894	-0.0152439	0.666442
PRE4g9-SAH1-TRg-3	-0.124233	-1.63513	-0.123182	0.146307
PRE4g9-CHS2-TRg-1	0.00495576	0.0184229	0.0062424	0.981004
PRE4g9-DPM1-TRg-2	0.00161058	-0.0243935	0.0031328	0.989684
PRE4g9-BBP1-TRg-1	0.102328	1.26474	0.100439	0.359551
PRE4g9-NRD1-TRg-4	-0.0266465	-0.386069	-0.0269808	0.459199
PRE4g9-RPB3-NRg-1	-0.00858588	-0.154902	-0.0100655	0.858372
PRE4g9-PHO85-NRg-6	-0.101287	-1.34143	-0.101337	0.211242
PRE4g9-SNF6-TRg-6	0.0405847	0.474454	0.0416366	0.644832
PRE4g9-PRP38-NRg-2	-0.0181387	-0.277174	-0.0188883	0.813882
PRE4g9-OAR1-NRg-3	0.0316325	0.359871	0.0327686	0.713864
PRE4g9-ROX3-NRg-1	0.0285578	0.320516	0.0304004	0.690293
PRE4g9-YPP1-TRg-6	-0.013074	-0.212348	-0.0131952	0.696125
PRE4g9-CBF2-NRg-8	-0.0288204	-0.413893	-0.0265669	0.68635
PRE4g9-SPT6-TRg-5	0.00741808	0.0499393	0.00723482	0.978556
PRE4g9-SEC10-NRg-1	0.0885892	1.08888	0.0870496	0.482816
PRE4g9-NSL1-NRg-3	-0.0156375	-0.24516	-0.0184161	0.834189
PRE4g9-NRD1-NRg-8	0.0214957	0.230125	0.0215975	0.894435
PRE4g9-RPB3-TRg-1	-0.0532207	-0.726203	-0.0537826	0.354592
PRE4g9-NRD1-NRg-4	0.000612071	-0.0371738	0.00125654	0.97079
PRE4g9-RVB1-TRg-2	-0.0430799	-0.596407	-0.0444224	0.216895
PRE4g9-TIF5-NRg-8	0.223484	2.81546	0.222566	0.21073
PRE4g9-EOS1-NRg-1	6.29267e-05	-0.0442026	-0.000571392	0.95815
PRE4g9-ERG25-NA-26	-0.0531631	-0.725466	-0.053309	0.577103
PRE4g9-MSL5-NRg-4	-0.0409995	-0.569779	-0.0386024	0.275953
PRE4g9-SEC24-TRg-2	0.149133	1.86381	0.146752	0.349405
PRE4g9-RPL30-NRg-5	-0.0724823	-0.972741	-0.0734256	0.504557
PRE4g9-SNU71-NRg-3	0.0204622	0.216897	0.0219541	0.64469
PRE4g9-CDC33-NRg-1	-0.0293577	-0.42077	-0.0286163	0.64188
PRE4g9-RPN6-TRg-4	0.0186743	0.194012	0.0194812	0.885086
PRE4g9-NAB2-TRg-4	0.00416828	0.00834362	0.00368016	0.994291
PRE4g9-NAB2-TRg-6	-0.0208912	-0.312403	-0.0202296	0.861867
PRE4g9-YTM1-NRg-1	0.0301352	0.340706	0.0311738	0.711435
PRE4g9-OLE1-TRg-8	-0.0282515	-0.406612	-0.0284187	0.2677
PRE4g9-OLE1-TRg-1	-0.0549607	-0.748475	-0.0541927	0.402793
PRE4g9-UTP7-TRg-4	-0.0378218	-0.529106	-0.0374013	0.2677
PRE4g9-ACT1-NRg-6	-0.0649722	-0.876616	-0.0656497	0.193001
PRE4g9-RPL18A-NRg-3	0.0133932	0.126418	0.0126064	0.849836
PRE4g9-BRX1-NRg-1	-0.00604836	-0.122424	-0.00544471	0.852883
PRE4g9-NAF1-TRg-8	-0.00354337	-0.0903612	-0.00189858	0.813078
PRE4g9-NAF1-TRg-6	-0.0394208	-0.549572	-0.0381922	0.743358
PRE4g9-NAF1-TRg-4	0.0958359	1.18164	0.0971043	0.319008
PRE4g9-CDC8-TRg-2	0.0348474	0.401019	0.0365008	0.688917
PRE4g9-NSE4-TRg-1	-0.033032	-0.467799	-0.0328617	0.438686
PRE4g9-PAB1-NRg-2	-0.0507979	-0.695193	-0.0517551	0.672359
PRE4g9-PRP43-TRg-4	0.0294926	0.332481	0.0287524	0.840095
PRE4g9-SEC2-NRg-3	-0.0414744	-0.575857	-0.0411327	0.509152
PRE4g9-SEC2-NRg-6	-0.0325918	-0.462165	-0.0318544	0.517477
PRE4g9-MPP10-NRg-5	0.00650956	0.0383108	0.00747459	0.975225
PRE4g9-YDR355C-TRg-2	-0.0597859	-0.810235	-0.0599455	0.557234
PRE4g9-YLR339C-TRg-9	-0.030393	-0.434021	-0.031025	0.677952
PRE4g9-SNM1-TRg-2	0.0384706	0.447394	0.0393449	0.50403
PRE4g9-ALR1-NRg-4	-0.0399285	-0.556071	-0.04083	0.346406
PRE4g9-ALR1-NRg-1	-0.0187772	-0.285346	-0.0193675	0.807851
PRE4g9-ALR1-NRg-3	-0.0108468	-0.183841	-0.0111272	0.881405
PRE4g9-RPL10-TRg-1	0.0240349	0.262625	0.0251416	0.645082
PRE4g9-RPL28-TRg-2	-0.0380176	-0.531613	-0.0372976	0.491069
PRE4g9-UTP25-TRg-1	0.0680815	0.826397	0.068836	0.359457
PRE4g9-POB3-TRg-1	0.0509046	0.606542	0.0509631	0.621444
PRE4g9-POB3-TRg-3	0.0384921	0.447669	0.0371335	0.685261
PRE4g9-POB3-TRg-2	0.025583	0.282441	0.0260161	0.475828
PRE4g9-MED11-TRg-1	0.0407561	0.476647	0.0409446	0.738931
PRE4g9-ISA1-TRg-15	0.0182294	0.188318	0.0143195	0.956119
PRE4g9-RRP1-NRg-1	0.0404819	0.473138	0.0414728	0.367314
PRE4g9-MES1-NRg-1	0.0614963	0.74211	0.0609138	0.594476
PRE4g9-SEC13-NRg-5	0.00211962	-0.017878	-0.00129185	0.961494
PRE4g9-MCM2-NRg-2	-0.0214135	-0.319089	-0.0199296	0.551331
PRE4g9-ALA1-TRg-4	0.0602894	0.726663	0.0600122	0.483832
PRE4g9-MTG2-TRg-5	-0.0518435	-0.708576	-0.0517711	0.400665
PRE4g9-TIF35-NRg-3	0.0487699	0.57922	0.0496318	0.249483
PRE4g9-NSE1-TRg-3	-0.0273654	-0.39527	-0.0256118	0.854389
PRE4g9-NSE1-TRg-4	-0.0207281	-0.310316	-0.0196565	0.655894
PRE4g9-MOB2-NRg-6	-0.0154917	-0.243293	-0.0163003	0.777328
PRE4g9-VRG4-NRg-3	-0.0441368	-0.609935	-0.0440491	0.374481
PRE4g9-PRP9-TRg-3	0.0772351	0.943558	0.0768132	0.319337
PRE4g9-HYM1-TRg-5	0.00878099	0.0673838	0.00748959	0.97051
PRE4g9-POP1-TRg-5	-0.0299812	-0.428751	-0.0293178	0.560925
PRE4g9-POP1-TRg-9	-0.10258	-1.35797	-0.101896	0.29728
PRE4g9-RPL17A-TRg-1	-0.065067	-0.87783	-0.063894	0.392134
PRE4g9-SLD2-TRg-1	-0.0433831	-0.600287	-0.0438933	0.548723
PRE4g9-CDC48-NRg-7	0.0941308	1.15981	0.0950465	0.159349
PRE4g9-FHL1-NRg-2	0.0297388	0.335632	0.0307885	0.713889
PRE4g9-BET3-NRg-7	-0.00900803	-0.160306	-0.00801469	0.947496
PRE4g9-MAK21-TRg-1	0.0169104	0.171436	0.0177176	0.857035
PRE4g9-BRN1-TRg-4	0.0346779	0.39885	0.0327369	0.35354
PRE4g9-FBA1-NRg-3	-0.00191073	-0.0694642	-0.000750147	0.950046
PRE4g9-CDC42-TRg-6	-0.180918	-2.36065	-0.182017	0.482859
PRE4g9-CDC42-TRg-7	-0.0060753	-0.122768	-0.00640715	0.939642
PRE4g9-COG4-NRg-1	-0.0608988	-0.824478	-0.0605603	0.572026
PRE4g9-ATP3-NRg-3	0.0056999	0.0279475	0.00720567	0.971574
PRE4g9-ATP3-NRg-2	-0.0266071	-0.385565	-0.0253677	0.733423
PRE4g9-SMP3-TRg-5	-0.0785898	-1.05091	-0.0769744	0.576865
PRE4g9-CFT2-NRg-2	-0.0672915	-0.906301	-0.0677632	0.235006
PRE4g9-FAS2-TRg-5	0.0614705	0.74178	0.0613467	0.315577
PRE4g9-DBP2-NRg-3	0.00959738	0.0778332	0.011176	0.952221
PRE4g9-DBP2-NRg-2	0.0393385	0.458503	0.0403459	0.771628
PRE4g9-MPS2-NRg-4	0.0299734	0.338635	0.0301468	0.799055
PRE4g9-ARC35-TRg-2	0.052166	0.622688	0.0508593	0.5439
PRE4g9-ARC35-TRg-5	-0.076523	-1.02446	-0.0817805	0.260127
PRE4g9-MRD1-TRg-1	0.0817589	1.00146	0.0817889	0.414992
PRE4g9-RLP7-TRg-1	-0.0360977	-0.507038	-0.0355968	0.627434
PRE4g9-SPC34-TRg-1	0.0405453	0.47395	0.0404291	0.852542
PRE4g9-CDC45-TRg-2	0.00306226	-0.00581273	0.00415964	0.999374
PRE4g9-GCD6-TRg-3	0.0246319	0.270267	0.0249987	0.332295
PRE4g9-GCD6-TRg-4	0.0361287	0.417419	0.0369146	0.75338
PRE4g9-YPT6-NRg-2	-0.0468222	-0.644306	-0.0494984	0.803976
PRE4g9-RPS13-TRg-2	-0.0156978	-0.245932	-0.0156406	0.648854
PRE4g9-IPI3-TRg-3	0.00691737	0.0435305	0.00858953	0.914781
PRE4g9-TIF5-NRg-9	-0.0147596	-0.233922	-0.016084	0.873738
PRE4g9-TIF5-NRg-7	0.0661458	0.801621	0.0667638	0.55882
PRE4g9-TIF5-NRg-6	0.0543241	0.65031	0.0535369	0.676569
PRE4g9-NAB3-TRg-3	-0.00840888	-0.152637	-0.0100425	0.864273
PRE4g9-GCD2-TRg-1	0.0793726	0.970917	0.0791532	0.42565
PRE4g9-UBA1-TRg-2	0.0041465	0.00806491	0.00433783	0.998457
PRE4g9-SLD3-TRg-6	0.047733	0.565948	0.0466467	0.641351
PRE4g9-LCB1-TRg-5	0.0380667	0.442224	0.0396115	0.544434
PRE4g9-TOA2-TRg-6	0.111024	1.37604	0.110296	0.448451
PRE4g9-TOA2-TRg-1	0.0609066	0.734562	0.0612657	0.59602
PRE4g9-TOA2-TRg-3	0.0803968	0.984026	0.080638	0.672297
PRE4g9-LSM2-TRg-1	0.0355566	0.410097	0.0369748	0.605223
PRE4g9-YML6-TRg-13	0.00243551	-0.0138348	0.00371723	0.997777
PRE4g9-YML6-TRg-12	-0.041575	-0.577145	-0.0399827	0.601513
PRE4g9-UTP15-NRg-1	0.0130327	0.121803	0.0130938	0.891626
PRE4g9-TIF6-NRg-8	0.00516195	0.0210621	0.00628034	0.988428
PRE4g9-SUP35-NRg-1	0.0110693	0.0966728	0.0109825	0.885303
PRE4g9-MPP10-NRg-1	0.0267181	0.296969	0.0276307	0.754931
PRE4g9-SWI3-TRg-7	-0.0445402	-0.615098	-0.0433044	0.344367
PRE4g9-SSN3-NRg-2	-0.01767	-0.271174	-0.0161713	0.841301
PRE4g9-SEC13-NRg-7	0.021731	0.233137	0.0203168	0.762085
PRE4g9-RPS15-NRg-3	-0.0561341	-0.763494	-0.0574942	0.555043
PRE4g9-RPL3-TRg-2	0.0165246	0.166497	0.0172678	0.68988
PRE4g9-FBA1-NRg-2	-0.0123782	-0.203442	-0.0107521	0.774812
PRE4g9-FBA1-NRg-1	-0.0483032	-0.663262	-0.0465011	0.380154
PRE4g9-FBA1-NRg-5	-0.0134341	-0.216957	-0.0116368	0.879778
PRE4g9-DAM1-TRg-2	0.0480032	0.569406	0.0444632	0.748836
PRE4g9-NHP2-TRg-2	-0.00950067	-0.166611	-0.00812484	0.833298
PRE4g9-HCA4-NRg-6	0.0287992	0.323605	0.0293088	0.884417
PRE4g9-PRE3-TRg-4	-0.107819	-1.42503	-0.109873	0.422901
PRE4g9-DBP5-NRg-4	0.0260578	0.288517	0.0266056	0.729873
PRE4g9-SPT6-NRg-4	0.0448759	0.529378	0.0453885	0.576843
PRE4g9-SPT6-NRg-2	-0.0511113	-0.699204	-0.0500137	0.299847
PRE4g9-RPL18A-TRg-4	0.00954423	0.0771528	0.00951068	0.92381
PRE4g9-KSH1-TRg-1	-0.00511651	-0.110497	-0.00439042	0.955668
PRE4g9-KSH1-TRg-3	0.00369683	0.00230935	0.00485839	0.986841
PRE4g9-IPI3-NRg-1	0.0431733	0.507586	0.0434388	0.620945
PRE4g9-PGA2-TRg-8	-0.00413203	-0.0978957	-0.00222806	0.789357
PRE4g9-RPL18A-TRg-2	-0.0009338	-0.0569601	-0.000204516	0.965841
PRE4g9-RPL33A-NRg-6	0.0188106	0.195758	0.0185251	0.883003
PRE4g9-TAF12-NRg-2	0.0623546	0.753096	0.063229	0.548285
PRE4g9-USE1-TRg-5	-0.0272069	-0.393242	-0.025125	0.452861
PRE4g9-YNL114C-TRg-1	0.0309832	0.35156	0.032233	0.612538
PRE4g9-SMC5-TRg-7	-0.0663434	-0.894166	-0.0654323	0.206374
PRE4g9-SMC5-TRg-6	-0.0204986	-0.307379	-0.0187533	0.887872
PRE4g9-RSC58-TRg-1	0.0577554	0.694229	0.0584044	0.188148
PRE4g9-CTF13-TRg-2	0.0112304	0.0987349	0.0101936	0.958158
PRE4g9-NAB2-NRg-2	-0.0158105	-0.247374	-0.0160863	0.796261
PRE4g9-MCM7-TRg-4	-0.134354	-1.76467	-0.134865	0.367864
PRE4g9-BCP1-NRg-5	-0.000269513	-0.0484576	-0.00108844	0.926502
PRE4g9-STU2-TRg-3	0.00932726	0.0743757	0.00828663	0.978042
PRE4g9-SEC21-NRg-6	0.101252	1.25097	0.100325	0.210101
PRE4g9-SEC21-NRg-3	0.0294572	0.332027	0.0280978	0.55072
PRE4g9-RPL1B-TRg-3	0.00426573	0.00959093	0.00472714	0.983935
PRE4g9-SEC20-NRg-2	0.0270872	0.301694	0.0286923	0.224381
PRE4g9-VMA3-NRg-2	-0.0140646	-0.225026	-0.0131926	0.906418
PRE4g9-SEC23-NRg-5	-0.0081264	-0.149021	-0.00726507	0.832396
PRE4g9-CDC28-TRg-4	0.0312539	0.355025	0.0322996	0.776125
PRE4g9-RPN12-NRg-11	0.0178772	0.18381	0.0183616	0.9327
PRE4g9-PUP3-TRg-3	-0.0208882	-0.312365	-0.0217902	0.780088
PRE4g9-SEC31-TRg-2	-0.0710967	-0.955007	-0.0711735	0.383969
PRE4g9-SED5-TRg-6	-0.00361857	-0.0913237	-0.0036599	0.766415
PRE4g9-SED5-TRg-5	-0.0481595	-0.661423	-0.0474975	0.277871
PRE4g9-RPL33A-TRg-1	0.0120394	0.109089	0.0131934	0.958759
PRE4g9-RPL33A-TRg-2	-0.0338264	-0.477967	-0.0325453	0.780082
PRE4g9-MRPL11-TRg-2	0.0259997	0.287774	0.0274065	0.636841
PRE4g9-RTP1-NRg-2	-0.042855	-0.593528	-0.0420864	0.657159
PRE4g9-NUG1-TRg-2	0.026294	0.29154	0.0270128	0.829885
PRE4g9-VPH2-TRg-4	0.0536155	0.64124	0.0550995	0.509236
PRE4g9-COP1-NRg-3	0.0860206	1.05601	0.085368	0.404269
PRE4g9-CRM1-NRg-1	0.00514425	0.0208355	0.0050774	0.993925
PRE4g9-RPL5-NRg-4	-0.0479374	-0.658579	-0.050362	0.80158
PRE4g9-SNU13-NRg-4	0.107	1.32454	0.1066	0.466888
PRE4g9-PFS2-TRg-3	-0.0764406	-1.02341	-0.0777084	0.521939
PRE4g9-MPP10-TRg-2	-0.0114942	-0.192128	-0.0113826	0.699293
PRE4g9-TSR4-NRg-2	-0.111402	-1.47089	-0.109894	0.31751
PRE4g9-RSC2-TRg-1	-0.0233059	-0.343311	-0.0220659	0.791084
PRE4g9-SEC65-TRg-2	0.059391	0.715164	0.060096	0.529018
PRE4g9-SMI1-NRg-1	0.0719814	0.876314	0.0732048	0.472986
PRE4g9-RTT105-NRg-4	0.0133146	0.125412	0.0145969	0.890633
PRE4g9-VMA5-TRg-3	-0.0209219	-0.312796	-0.0199774	0.460955
PRE4g9-VMA5-TRg-5	-0.0288486	-0.414254	-0.0270963	0.703044
PRE4g9-RRP1-TRg-3	0.0351456	0.404836	0.0364614	0.761847
PRE4g9-CLC1-TRg-2	-0.0352542	-0.496242	-0.0366769	0.760221
PRE4g9-GCD6-NRg-1	0.0300594	0.339736	0.0299228	0.756717
PRE4g9-GCD6-NRg-2	-0.0223175	-0.33066	-0.0215298	0.621645
PRE4g9-PXR1-TRg-1	0.0268882	0.299147	0.0282159	0.74557
PRE4g9-CDC14-NRg-1	-0.0125721	-0.205923	-0.0115384	0.856298
PRE4g9-PCF11-TRg-6	-0.0384642	-0.537329	-0.040752	0.425727
PRE4g9-PCF11-TRg-5	-0.0730271	-0.979714	-0.0754164	0.449254
PRE4g9-PCF11-TRg-4	-0.0800598	-1.06973	-0.0831114	0.318122
PRE4g9-SEC31-NRg-1	0.0974949	1.20287	0.0940383	0.454954
PRE4g9-RRP5-NRg-1	0.0050485	0.01961	0.00596506	0.980579
PRE4g9-PRE10-TRg-5	0.0340791	0.391185	0.0330887	0.780171
PRE4g9-PRE10-TRg-1	-0.0114472	-0.191526	-0.0121137	0.534037
PRE4g9-RPS5-TRg-2	-0.0251415	-0.366806	-0.0262906	0.641682
PRE4g9-NSP1-TRg-4	0.0448852	0.529498	0.0452608	0.677776
PRE4g9-PRP38-TRg-4	-0.0170016	-0.262619	-0.0155267	0.819748
PRE4g9-RCF1-NRg-5	-0.0169774	-0.26231	-0.0163194	0.631465
PRE4g9-RSC3-TRg-4	-0.0195307	-0.29499	-0.0181092	0.830929
PRE4g9-RSC3-TRg-5	0.0111556	0.0977774	0.0120319	0.917589
PRE4g9-RSC3-TRg-6	-0.0271185	-0.39211	-0.025681	0.577103
PRE4g9-HTA1-NRg-12	-0.0412934	-0.573541	-0.0404459	0.623498
PRE4g9-HTA1-NRg-11	-0.026716	-0.386957	-0.0255513	0.680631
PRE4g9-UTP23-TRg-2	-0.0211346	-0.315519	-0.0199503	0.814224
PRE4g9-GCD7-NRg-1	0.0415	0.486168	0.0400335	0.660917
PRE4g9-GCD7-NRg-2	-0.0081113	-0.148828	-0.00681313	0.894435
PRE4g9-GCD7-NRg-6	-0.00243214	-0.076138	-0.00163032	0.947218
PRE4g9-GAL11-NRg-2	0.0241784	0.264463	0.0254289	0.606696
PRE4g9-GAL11-NRg-9	-0.0319691	-0.454195	-0.0317494	0.78871
PRE4g9-PHO4-TRg-5	0.0766416	0.935962	0.0763186	0.266207
PRE4g9-SNP1-NRg-3	0.0480267	0.569707	0.0493042	0.467982
PRE4g9-RPC37-TRg-5	0.0483321	0.573616	0.0487105	0.377257
PRE4g9-CRM1-TRg-5	-0.0099843	-0.172801	-0.00890843	0.829885
PRE4g9-CRM1-TRg-2	0.0398179	0.464639	0.0414423	0.46239
PRE4g9-ASK1-TRg-7	0.0165083	0.166289	0.0120884	0.961567
PRE4g9-STU2-NRg-4	0.0121873	0.110983	0.0117258	0.961358
PRE4g9-NEO1-NRg-3	-0.0466159	-0.641665	-0.0511621	0.264748
PRE4g9-GAL11-TRg-5	0.0129223	0.12039	0.0137656	0.918999
PRE4g9-GAL11-TRg-7	-0.00938507	-0.165132	-0.00794197	0.727846
PRE4g9-SAM50-NRg-3	0.0181508	0.187312	0.0199603	0.777218
PRE4g9-CSL4-TRg-2	-0.0221913	-0.329044	-0.0211712	0.881818
PRE4g9-CCT5-TRg-2	-0.0344461	-0.485899	-0.0329329	0.628951
PRE4g9-POL30-NRg-1	-0.0351501	-0.49491	-0.0338823	0.593163
PRE4g9-MED4-TRg-4	0.0396052	0.461916	0.0402218	0.324832
PRE4g9-MED4-TRg-3	0.0205533	0.218063	0.0211445	0.613433
PRE4g9-MED4-TRg-2	0.00812858	0.0590333	0.00913886	0.914103
PRE4g9-GDI1-TRg-4	-0.0661448	-0.891624	-0.0659477	0.343008
PRE4g9-GDI1-TRg-3	-0.0122849	-0.202247	-0.0118548	0.693609
PRE4g9-REB1-TRg-6	-0.0459785	-0.633507	-0.0477678	0.380755
PRE4g9-MRPL37-NRg-2	-0.0299914	-0.428882	-0.0278621	0.539654
PRE4g9-NOC3-TRg-3	0.0498397	0.592912	0.050704	0.42411
PRE4g9-SPC97-TRg-3	-0.0273362	-0.394897	-0.0312245	0.791248
PRE4g9-IPP1-TRg-3	0.015298	0.150798	0.0162018	0.828239
PRE4g9-IPP1-TRg-2	0.112306	1.39245	0.112117	0.331017
PRE4g9-PTI1-TRg-3	-0.0365201	-0.512445	-0.0389805	0.405438
PRE4g9-PTI1-TRg-5	-0.129632	-1.70422	-0.129756	0.52647
PRE4g9-RFC5-NRg-1	-0.00881859	-0.157881	-0.00721721	0.85015
PRE4g9-CDC24-TRg-1	0.00461703	0.0140874	0.00534611	0.99259
PRE4g9-CDC24-TRg-3	0.0340718	0.391091	0.0325931	0.0791855
PRE4g9-CDC24-TRg-5	0.0340307	0.390566	0.0322344	0.844547
PRE4g9-CDC24-TRg-6	-0.0239344	-0.351356	-0.0249369	0.823272
PRE4g9-UTP23-TRg-6	0.00781494	0.0550188	0.00966687	0.958044
PRE4g9-UTP23-TRg-4	-0.0336866	-0.476178	-0.0332938	0.475373
PRE4g9-UTP23-TRg-1	0.0106097	0.09079	0.0108587	0.929336
PRE4g9-RHO3-NRg-4	-0.0585339	-0.79421	-0.0567036	0.624085
PRE4g9-TRS23-NRg-1	-0.116727	-1.53905	-0.118214	0.368176
PRE4g9-TRS23-NRg-3	-0.0297328	-0.425571	-0.0309914	0.715129
PRE4g9-RSP5-TRg-2	-0.0337806	-0.477381	-0.0338166	0.632963
PRE4g9-RSP5-TRg-1	-0.0353399	-0.49734	-0.0350233	0.796519
PRE4g9-SDA1-NRg-1	0.0346157	0.398053	0.0353221	0.726563
PRE4g9-KAP95-TRg-8	-0.107434	-1.4201	-0.107375	0.495489
PRE4g9-ACO1-TRg-6	0.0239813	0.261939	0.0209904	0.912256
PRE4g9-HTA1-NRg-3	-0.0173347	-0.266882	-0.0166383	0.887397
PRE4g9-HTA1-NRg-2	0.00138676	-0.0272583	0.001153	0.976221
PRE4g9-SPN1-TRg-1	-0.00918759	-0.162604	-0.00956488	0.889671
PRE4g9-MOT1-NRg-7	-0.0323399	-0.45894	-0.03178	0.68988
PRE4g9-RPL17A-NRg-4	0.00774794	0.0541613	0.00834173	0.978393
PRE4g9-ADA2-TRg-4	-0.0157569	-0.246687	-0.014922	0.888755
PRE4g9-SFH1-NRg-1	0.00340438	-0.00143388	0.00496925	0.981195
PRE4g9-SPC97-NRg-5	0.0170549	0.173285	0.0128278	0.954233
PRE4g9-PRP22-TRg-3	-0.0172501	-0.2658	-0.0187073	0.779195
PRE4g9-SEN15-TRg-2	0.0282187	0.316176	0.0288534	0.816407
PRE4g9-RPL3-NRg-2	-0.00212635	-0.0722241	-0.00420786	0.945684
PRE4g9-ISD11-NRg-2	0.0118975	0.107274	0.0130449	0.840095
PRE4g9-HEM12-TRg-8	-0.0542789	-0.739748	-0.0522183	0.482327
PRE4g9-SEC10-TRg-1	0.0557706	0.668825	0.0540002	0.744689
PRE4g9-HTB1-TRg-7	0.043401	0.510501	0.0446089	0.726558
PRE4g9-TTI2-TRg-1	0.049374	0.586952	0.0505854	0.241737
PRE4g9-ACP1-TRg-2	-0.0444926	-0.614488	-0.0445317	0.529526
PRE4g9-ACP1-TRg-4	0.00196499	-0.0198573	0.0027376	0.979317
PRE4g9-GAL11-NRg-10	0.0336264	0.385391	0.0326301	0.558569
PRE4g9-UTP22-TRg-2	-0.0158352	-0.247689	-0.0144757	0.552996
PRE4g9-MST1-NRg-5	-0.0514602	-0.70367	-0.0535016	0.620973
PRE4g9-RIB7-NRg-2	0.0397448	0.463703	0.0409797	0.782884
PRE4g9-MCD1-TRg-6	-0.0314112	-0.447053	-0.0308215	0.811556
PRE4g9-MCD1-TRg-5	-0.0675407	-0.909491	-0.0671264	0.251864
PRE4g9-GPI8-NRg-2	0.000742515	-0.0355042	0.000472126	0.988286
PRE4g9-THS1-TRg-2	0.0365683	0.423046	0.0375257	0.277542
PRE4g9-RRP7-TRg-2	0.0229056	0.248171	0.0227299	0.406772
PRE4g9-RRP7-TRg-5	0.0966517	1.19208	0.0955765	0.307301
PRE4g9-SMX2-NRg-7	0.0072842	0.0482257	0.00915994	0.958759
PRE4g9-RRP45-TRg-5	-0.135456	-1.77877	-0.135974	0.268771
PRE4g9-RRP45-TRg-4	-0.0842892	-1.12386	-0.0854844	0.44501
PRE4g9-CNS1-TRg-2	0.00505746	0.0197247	0.00440393	0.997194
PRE4g9-FBP1-NRg-9	0.0133738	0.12617	0.014797	0.924039
PRE4g9-GCD11-NRg-1	0.0694062	0.843353	0.0693626	0.543681
PRE4g9-RPL10-TRg-2	0.00462044	0.014131	0.00648001	0.940512
PRE4g9-NUP192-TRg-4	-0.0995179	-1.31878	-0.100986	0.211419
PRE4g9-NUP145-NRg-4	-0.095627	-1.26898	-0.0953122	0.488119
PRE4g9-HEM12-TRg-6	0.00717054	0.0467709	0.00927965	0.971734
PRE4g9-PLC1-TRg-3	-0.0168069	-0.260127	-0.0180093	0.619672
PRE4g9-RPA43-TRg-1	0.0230055	0.24945	0.0242832	0.899315
PRE4g9-RPB7-NRg-2	-0.027173	-0.392807	-0.0267793	0.601513
PRE4g9-RPB7-NRg-3	0.0016161	-0.0243228	0.00010738	0.972098
PRE4g9-NSL1-NRg-1	0.0139396	0.133411	0.0117787	0.685441
PRE4g9-UTP6-TRg-3	0.0479947	0.569297	0.0477923	0.664119
PRE4g9-UTP6-TRg-1	-0.00224451	-0.0737365	-0.00245372	0.974419
PRE4g9-YJU2-TRg-5	0.103175	1.27558	0.10258	0.421161
PRE4g9-FRS2-NRg-5	0.0324474	0.3703	0.0312232	0.679835
PRE4g9-TIF35-NRg-2	0.0423346	0.496851	0.04204	0.533201
PRE4g9-GPI15-TRg-1	0.0403886	0.471944	0.0420098	0.293724
PRE4g9-NOP1-NRg-5	0.0503487	0.599427	0.0500368	0.601184
PRE4g9-GPI15-TRg-4	0.0186103	0.193193	0.0201239	0.935211
PRE4g9-COG4-TRg-1	0.135513	1.68949	0.134293	0.690742
PRE4g9-TFA1-TRg-1	0.0648141	0.784577	0.0649961	0.407535
PRE4g9-RHO1-NRg-2	0.0139165	0.133116	0.0113892	0.940871
PRE4g9-RHO1-NRg-1	-0.000139713	-0.0467962	0.000987969	0.980401
PRE4g9-CDC55-NRg-2	-0.0510618	-0.698571	-0.0495882	0.384484
PRE4g9-IDI1-NRg-7	-0.0142782	-0.227761	-0.0133244	0.761612
PRE4g9-RPL32-TRg-5	-0.0759667	-1.01734	-0.0755201	0.697134
PRE4g9-RPB5-TRg-4	0.064532	0.780966	0.065332	0.117564
PRE4g9-DIP2-TRg-5	0.0340681	0.391044	0.0346387	0.502534
PRE4g9-DIP2-TRg-1	0.0218214	0.234294	0.0213693	0.849743
PRE4g9-RPC40-TRg-2	0.0428334	0.503235	0.0441123	0.432567
PRE4g9-CDC6-TRg-5	-0.0129476	-0.21073	-0.0118378	0.851003
PRE4g9-CDC6-TRg-3	-0.0177258	-0.271888	-0.0191274	0.664931
PRE4g9-DAD2-TRg-2	-0.0115726	-0.19313	-0.0148833	0.859453
PRE4g9-RVS161-TRg-2	0.0213765	0.2286	0.0214883	0.853459
PRE4g9-RVS161-TRg-1	-0.036798	-0.516002	-0.0365217	0.478781
PRE4g9-SUP45-NRg-3	0.0878019	1.07881	0.0877274	0.323419
PRE4g9-SRB6-NRg-5	-0.0699884	-0.94082	-0.0696398	0.550277
PRE4g9-RPC11-TRg-4	0.0524454	0.626264	0.0525528	0.394686
PRE4g9-RKI1-TRg-8	0.0197187	0.207381	0.021162	0.784509
PRE4g9-NIP7-TRg-3	0.0559276	0.670834	0.0564149	0.606008
PRE4g9-RPL33A-NRg-12	-0.0365965	-0.513423	-0.0364828	0.550855
PRE4g9-SAM50-TRg-4	-0.0413321	-0.574036	-0.0392964	0.865769
PRE4g9-NOP4-NRg-1	0.00811167	0.0588169	0.00883892	0.97227
PRE4g9-NOP4-NRg-3	-0.0169511	-0.261973	-0.0167009	0.796346
PRE4g9-SMX2-TRg-5	0.0284246	0.318811	0.0283138	0.476962
PRE4g9-POL12-NRg-2	-0.012224	-0.201469	-0.0135419	0.789452
PRE4g9-BMS1-NRg-2	0.0221525	0.238531	0.0232288	0.302954
PRE4g9-RPA190-TRg-5	0.0034159	-0.00128642	0.00459362	0.994624
PRE4g9-ALG14-NRg-4	0.0107255	0.0922724	0.0121971	0.906854
PRE4g9-ALG14-NRg-1	-0.0172067	-0.265245	-0.0156174	0.802033
PRE4g9-PRE5-NRg-1	0.0848395	1.04089	0.0843729	0.698308
PRE4g9-BIG1-NRg-2	-0.03488	-0.491453	-0.034548	0.464686
PRE4g9-TFA2-TRg-4	-0.023708	-0.348457	-0.0250016	0.737911
PRE4g9-IMP4-TRg-6	-0.0343734	-0.484968	-0.0331375	0.630054
PRE4g9-PAN1-NRg-1	0.116431	1.44524	0.115838	0.30645
PRE4g9-UTP13-TRg-2	0.0761039	0.929079	0.0762154	0.416947
PRE4g9-KAE1-NRg-3	0.0555604	0.666134	0.0571345	0.73127
PRE4g9-ERG20-TRg-1	0.0340307	0.390566	0.0351131	0.551331
PRE4g9-CDC20-TRg-6	-0.0729517	-0.97875	-0.0756879	0.185968
PRE4g9-PWP2-NRg-2	0.0226816	0.245304	0.0245112	0.859834
PRE4g9-COG1-NRg-1	-0.194975	-2.54058	-0.197029	0.492043
PRE4g9-RPL1B-TRg-4	-0.0134043	-0.216576	-0.0130125	0.840648
PRE4g9-RPL1B-TRg-7	-0.00973548	-0.169617	-0.00824283	0.449626
PRE4g9-UTP20-TRg-3	0.0377977	0.438782	0.0383097	0.816537
PRE4g9-UTP20-TRg-4	0.0921253	1.13415	0.0928546	0.344163
PRE4g9-RPL25-TRg-4	0.0535893	0.640905	0.05366	0.708035
PRE4g9-RPL25-TRg-2	-0.0182605	-0.278733	-0.018148	0.716231
PRE4g9-MCM7-NRg-1	-0.0330737	-0.468333	-0.0324382	0.73977
PRE4g9-MRP49-TRg-5	-0.0682429	-0.91848	-0.0666585	0.288034
PRE4g9-ERO1-NRg-3	-0.0175021	-0.269025	-0.0184227	0.857779
PRE4g9-UTP5-TRg-7	-0.0281168	-0.404888	-0.0268926	0.700688
PRE4g9-MCM4-NRg-1	-0.0177622	-0.272354	-0.0187855	0.442384
PRE4g9-PRE3-NRg-1	-0.0506902	-0.693814	-0.0499577	0.420634
PRE4g9-FCF1-NRg-1	-0.0657316	-0.886336	-0.0663149	0.461213
PRE4g9-CUS1-NRg-1	-0.0338769	-0.478613	-0.032975	0.382106
PRE4g9-PSF1-TRg-2	-0.032869	-0.465713	-0.0311254	0.6859
PRE4g9-BCP1-TRg-2	-0.032416	-0.459915	-0.0310084	0.604154
PRE4g9-PAN1-TRg-1	0.00802146	0.0576622	0.00808801	0.904571
PRE4g9-PAN1-TRg-3	0.122511	1.52307	0.122165	0.540659
PRE4g9-PAN1-TRg-4	0.0909352	1.11891	0.0903364	0.415496
PRE4g9-VPS3-TRg-2	-0.0441431	-0.610015	-0.0433582	0.602976
PRE4g9-YIL060W-NRg-1	0.00819807	0.0599227	0.00732498	0.971088
PRE4g9-VPS53-NRg-1	-0.00124476	-0.0609402	-0.0031656	0.860732
PRE4g9-CYR1-TRg-4	0.0126501	0.116907	0.0123659	0.940775
PRE4g9-CYR1-TRg-7	0.0175596	0.179745	0.0160698	0.809971
PRE4g9-MPS1-NRg-1	0.019392	0.203199	0.0179931	0.940655
PRE4g9-SRP1-TRg-5	0.0667272	0.809063	0.064202	0.699648
PRE4g9-SRP1-TRg-4	-0.0212105	-0.31649	-0.0236705	0.856679
PRE4g9-TAF12-TRg-2	0.0174219	0.177982	0.014613	0.915276
PRE4g9-TAF12-TRg-3	0.0424545	0.498386	0.0392177	0.66559
PRE4g9-POP4-TRg-1	0.0014214	-0.0268149	0.0018875	0.971767
PRE4g9-SPT16-TRg-1	0.0325719	0.371894	0.0331935	0.583624
PRE4g9-NUP82-TRg-4	-0.058555	-0.79448	-0.0580356	0.762255
PRE4g9-DML1-TRg-3	-0.00866099	-0.155864	-0.00685854	0.759751
PRE4g9-RPA43-NRg-3	0.0838278	1.02794	0.0840489	0.285929
PRE4g9-STU2-NRg-3	-0.0168561	-0.260757	-0.0164959	0.579258
PRE4g9-POP4-NRg-4	0.023519	0.256022	0.0239778	0.899464
PRE4g9-MCD1-TRg-2	-0.0555024	-0.755407	-0.0537226	0.498778
PRE4g9-RPS3-NRg-4	0.00586465	0.0300563	0.00579194	0.965501
PRE4g9-PRP9-TRg-4	-0.00526606	-0.112411	-0.00394776	0.878221
PRE4g9-RPP1-NRg-2	-0.0965397	-1.28066	-0.0950751	0.294863
PRE4g9-MTR2-NRg-11	-0.103623	-1.37132	-0.102481	0.460504
PRE4g9-GCD11-TRg-1	-0.0149343	-0.236159	-0.0142215	0.532382
PRE4g9-RPF1-TRg-3	-0.0254569	-0.370842	-0.0249794	0.538572
PRE4g9-SUB2-NRg-4	-0.170735	-2.23033	-0.170322	0.38774
PRE4g9-GPI15-TRg-3	0.0507468	0.604523	0.0511215	0.675202
PRE4g9-ERG9-TRg-6	0.0434086	0.510598	0.0440107	0.703737
PRE4g9-RPT2-NRg-1	0.0404963	0.473322	0.0403597	0.588972
PRE4g9-YOS1-NRg-3	-0.0118726	-0.19697	-0.0121215	0.665469
PRE4g9-SCM3-TRg-4	-0.0535138	-0.729955	-0.0532206	0.265755
PRE4g9-SCM3-TRg-6	-0.0237667	-0.349208	-0.0238199	0.779938
PRE4g9-RLP7-NRg-1	-0.0660545	-0.890468	-0.0646643	0.408825
PRE4g9-TFB2-NRg-4	0.00715963	0.0466313	0.00649412	0.972056
PRE4g9-IMP4-TRg-1	0.00103897	-0.0317098	0.00240871	0.935466
PRE4g9-IMP4-TRg-3	0.0191168	0.199676	0.0209255	0.687708
PRE4g9-PRE4-TRg-3	0.0347656	0.399972	0.0352107	0.816358
PRE4g9-SUB2-TRg-3	-0.0293307	-0.420424	-0.031183	0.73433
PRE4g9-RPP0-NRg-4	-0.0247153	-0.36135	-0.0257428	0.739291
PRE4g9-RPP0-NRg-3	-0.0172238	-0.265462	-0.0158278	0.466971
PRE4g9-TOM40-TRg-4	0.00760639	0.0523496	0.0082851	0.930945
PRE4g9-FUR1-NRg-12	0.00648652	0.0380158	0.00870105	0.923384
PRE4g9-TOM40-TRg-2	-0.000112749	-0.0464511	0.000248314	0.914196
PRE4g9-VMA11-NRg-4	-0.031002	-0.441816	-0.0294773	0.658081
PRE4g9-PGS1-NRg-4	0.0299487	0.338319	0.0312418	0.566069
PRE4g9-URB1-TRg-4	-0.0114012	-0.190937	-0.0103768	0.594802
PRE4g9-ARP4-TRg-3	0.037405	0.433755	0.0374013	0.255922
PRE4g9-RPT3-TRg-3	-0.0208912	-0.312404	-0.0212145	0.714849
PRE4g9-SUI3-TRg-3	0.0409376	0.47897	0.0409776	0.38848
PRE4g9-RFC5-NRg-2	NA	NA	NA	NA
PRE4g9-RRP14-TRg-2	0.0428494	0.50344	0.0420959	0.540674
PRE4g9-SCC2-TRg-1	-0.0203952	-0.306055	-0.021471	0.710931
PRE4g9-SSC1-TRg-3	-0.0187433	-0.284912	-0.0183135	0.627214
PRE4g9-RRP9-TRg-3	0.00536106	0.0236106	0.00666928	0.945979
PRE4g9-MOT1-NRg-9	0.00529072	0.0227103	0.0045465	0.997684
PRE4g9-RPL42A-NRg-2	-0.0406677	-0.565531	-0.0396186	0.415953
PRE4g9-SEC16-TRg-7	0.00523221	0.0219614	0.00271904	0.993307
PRE4g9-IMP4-NRg-2	0.034799	0.4004	0.0353952	0.521013
PRE4g9-YEF3-NRg-4	-0.0202114	-0.303702	-0.0214104	0.704975
PRE4g9-PUP1-TRg-1	-0.0697226	-0.937418	-0.0697331	0.406137
PRE4g9-UTP22-TRg-6	0.0211732	0.225997	0.0228087	0.868984
PRE4g9-DBP2-NRg-4	-0.0156493	-0.24531	-0.0151782	0.768308
PRE4g9-PRE2-TRg-7	-0.017837	-0.273312	-0.0174551	0.854351
PRE4g9-ATP16-TRg-6	-0.000751649	-0.0546287	5.14474e-05	0.88633
PRE4g9-UTP13-TRg-4	0.034043	0.390724	0.0336476	0.733129
PRE4g9-DOP1-NRg-4	-0.00585985	-0.120011	-0.00790281	0.917669
PRE4g9-TIM44-TRg-3	0.0347508	0.399783	0.0358872	0.592663
PRE4g9-ATP16-TRg-2	0.00244061	-0.0137695	0.00321871	0.994922
PRE4g9-ENP1-NRg-3	-0.0321748	-0.456828	-0.0321376	0.508356
PRE4g9-NAF1-TRg-3	0.0204815	0.217144	0.0222976	0.839539
PRE4g9-COG4-TRg-2	-0.0102702	-0.17646	-0.0106593	0.866622
PRE4g9-SOG2-TRg-7	0.0197393	0.207645	0.0193765	0.910589
PRE4g9-YDR341C-TRg-3	0.0196736	0.206803	0.0189267	0.910873
PRE4g9-YMR290W-A-TRg-10	0.0248529	0.273095	0.0266291	0.62251
PRE4g9-NUP192-NRg-9	0.023933	0.261321	0.0247575	0.85456
PRE4g9-RPS31-NRg-8	0.0088803	0.0686549	0.00865085	0.95766
PRE4g9-SPC97-NRg-6	-0.0824196	-1.09993	-0.0867307	0.622256
PRE4g9-EBP2-NRg-1	-0.0785466	-1.05036	-0.0781261	0.638866
PRE4g9-CDC48-TRg-5	0.0816626	1.00023	0.0809195	0.633088
PRE4g9-RPT1-TRg-4	-0.0528026	-0.720852	-0.0532374	0.371385
PRE4g9-ULP1-NRg-2	-0.0672194	-0.905379	-0.0660892	0.425131
PRE4g9-RPN3-TRg-6	0.0328253	0.375138	0.0307599	0.477077
PRE4g9-RPT1-TRg-5	0.0664172	0.805095	0.0657821	0.500835
PRE4g9-KRE5-TRg-2	-0.0459654	-0.63334	-0.0444189	0.588479
PRE4g9-TBF1-NRg-8	0.00873594	0.0668072	0.00975797	0.763726
PRE4g9-UTP22-NRg-4	-0.0179778	-0.275114	-0.0167194	0.831134
PRE4g9-SSC1-NRg-4	0.0288795	0.324634	0.0296925	0.807798
PRE4g9-REB1-TRg-4	0.00265834	-0.0109827	0.00149575	0.957126
PRE4g9-CDC48-NRg-9	0.0723381	0.880879	0.0727261	0.54698
PRE4g9-FAS2-TRg-8	0.0752208	0.917776	0.0731357	0.774096
PRE4g9-TAO3-TRg-8	0.0156163	0.154872	0.0152294	0.815928
PRE4g9-CKS1-TRg-5	0.0357617	0.412722	0.0343032	0.836882
PRE4g9-YLR379W-TRg-7	-0.0164747	-0.255875	-0.0148646	0.873738
PRE4g9-TEN1-NRg-2	0.0417943	0.489936	0.0404761	0.645325
PRE4g9-RPL42A-TRg-2	0.00211141	-0.0179831	0.00296301	0.986202
PRE4g9-SEC27-TRg-4	0.0884761	1.08744	0.0844157	0.341574
PRE4g9-TBF1-NRg-4	-0.0199067	-0.299803	-0.0201259	0.565858
PRE4g9-RPT1-NRg-6	-0.0176919	-0.271455	-0.0196783	0.727164
PRE4g9-COG1-TRg-3	-0.07284	-0.977319	-0.0764106	0.439186
PRE4g9-SUI1-TRg-6	-0.0723944	-0.971616	-0.0710979	0.266862
PRE4g9-TIM23-TRg-6	-0.00227136	-0.0740802	-0.000940171	0.961086
PRE4g9-CDC48-NRg-6	0.077855	0.951493	0.0781058	0.542643
PRE4g9-EPL1-TRg-5	0.0486479	0.577657	0.0465903	0.830785
PRE4g9-RPT5-TRg-8	0.0291386	0.32795	0.0287646	0.934979
PRE4g9-ATP16-NRg-4	-0.0349034	-0.491752	-0.0340733	0.693767
PRE4g9-RPN6-TRg-3	0.12957	1.61341	0.128859	0.303149
PRE4g9-ERG9-NRg-6	0.0147318	0.143551	0.0143451	0.941503
PRE4g9-SMX3-TRg-1	0.0376442	0.436817	0.0369852	0.741986
PRE4g9-NCB2-NRg-3	0.0192012	0.200757	0.0197571	0.765464
PRE4g9-SEC16-NRg-12	-0.022919	-0.338358	-0.0246488	0.211242
PRE4g9-RPN6-TRg-2	0.0345857	0.397669	0.035094	0.424561
PRE4g9-REB1-NRg-4	-0.0523869	-0.715531	-0.0523673	0.267936
PRE4g9-ATP16-TRg-9	-0.0179928	-0.275305	-0.0165744	0.851084
PRE4g9-ERG9-NRg-7	-0.0686583	-0.923796	-0.068772	0.354051
PRE4g3-RPL15A-NRg-4	-0.0141398	-0.22599	-0.0162675	0.848384
PRE4g3-RPL15A-NRg-5	-0.00198862	-0.0704613	-0.00304328	0.914015
PRE4g3-KRE33-TRg-1	0.0479334	0.568513	0.0490733	0.521015
PRE4g3-PMI40-NRg-1	-0.0115401	-0.192715	-0.0100933	0.64933
PRE4g3-NOP19-NRg-3	-0.0222831	-0.33022	-0.0208814	0.653756
PRE4g3-SRP14-NRg-4	0.0718657	0.874833	0.0720468	0.247984
PRE4g3-SEC27-TRg-2	-0.0102636	-0.176376	-0.0144226	0.896599
PRE4g3-GPI14-TRg-3	-0.0355056	-0.499459	-0.0339471	0.745328
PRE4g3-PAH1-TRg-7	0.122224	1.5194	0.120937	0.280451
PRE4g3-PAH1-TRg-6	0.139727	1.74342	0.138386	0.170054
PRE4g3-PAH1-TRg-5	0.169098	2.11936	0.168047	0.218991
PRE4g3-PAH1-TRg-3	0.138149	1.72322	0.13781	0.222667
PRE4g3-COG3-TRg-1	0.03618	0.418076	0.0357374	0.565561
PRE4g3-HTS1-NRg-5	0.0702509	0.854164	0.0717811	0.372651
PRE4g3-MSN5-TRg-7	0.137763	1.71828	0.136736	0.23631
PRE4g3-ERG26-TRg-1	-0.046886	-0.645123	-0.0468644	0.572328
PRE4g3-SMD2-TRg-5	-0.0109206	-0.184786	-0.00871497	0.681795
PRE4g3-SMD2-TRg-4	0.00841428	0.0626901	0.0106507	0.938584
PRE4g3-SMD2-TRg-1	-0.00574448	-0.118534	-0.00395577	0.400753
PRE4g3-PRE7-TRg-4	0.0559967	0.671719	0.0539004	0.264264
PRE4g3-PRE7-TRg-7	-0.0125893	-0.206144	-0.0119646	0.724125
PRE4g3-SEC6-TRg-3	0.0425767	0.49995	0.0419436	0.533201
PRE4g3-ESF2-NRg-1	0.0272452	0.303715	0.0281622	0.640165
PRE4g3-ESF2-NRg-3	0.0216327	0.231879	0.0218055	0.475208
PRE4g3-AFG2-TRg-2	0.027638	0.308743	0.0294487	0.260279
PRE4g3-RRP36-TRg-3	0.0128678	0.119693	0.0121675	0.93061
PRE4g3-RRP36-TRg-5	0.0321927	0.367041	0.0328694	0.556776
PRE4g3-GCR1-NRg-2	-0.0324115	-0.459858	-0.0310084	0.78871
PRE4g3-PRE4-NRg-4	0.0394491	0.459918	0.037177	0.740539
PRE4g3-PRE4-NRg-9	-0.00951817	-0.166835	-0.00860158	0.813714
PRE4g3-DSN1-NRg-2	-0.00419977	-0.0987627	-0.00292022	0.94393
PRE4g3-GPI11-TRg-3	-0.0923945	-1.22761	-0.0921807	0.295854
PRE4g3-POP3-TRg-1	0.048804	0.579656	0.0504027	0.46596
PRE4g3-MNE1-TRg-5	-0.241388	-3.13465	-0.243589	0.292873
PRE4g3-RRP12-NRg-1	-0.00929882	-0.164028	-0.00832501	0.76676
PRE4g3-RSC6-TRg-2	0.11233	1.39275	0.112085	0.244556
PRE4g3-CDC25-TRg-1	-0.101986	-1.35037	-0.103135	0.351714
PRE4g3-CDC25-TRg-9	-0.160038	-2.09341	-0.163458	0.298786
PRE4g3-YPP1-NRg-3	0.0560839	0.672835	0.05548	0.662442
PRE4g3-NFS1-NRg-9	0.0103777	0.0878203	0.0105661	0.747581
PRE4g3-NFS1-NRg-8	0.0220907	0.237741	0.02227	0.68449
PRE4g3-UBA2-TRg-1	-0.0113905	-0.1908	-0.00947989	0.468274
PRE4g3-ARP2-NRg-3	-0.0206837	-0.309748	-0.0243905	0.661151
PRE4g3-MAK16-TRg-1	0.0502007	0.597533	0.0498068	0.321422
PRE4g3-CEP3-NRg-1	0.0146339	0.142298	0.0139025	0.525619
PRE4g3-GUK1-TRg-5	-0.000133063	-0.0467111	0.00132783	0.888755
PRE4g3-GUK1-TRg-2	0.0603912	0.727966	0.0614775	0.434658
PRE4g3-GPI12-NRg-6	-0.0672402	-0.905645	-0.067413	0.211622
PRE4g3-RPS5-NRg-5	-0.0714922	-0.960068	-0.0716244	0.343734
PRE4g3-RPS5-NRg-2	-0.0652371	-0.880006	-0.0643935	0.484544
PRE4g3-RPC19-NRg-1	0.065927	0.798821	0.0663905	0.211242
PRE4g3-TIM54-TRg-1	-0.0129045	-0.210178	-0.0107212	0.624283
PRE4g3-TEN1-TRg-2	0.0568145	0.682186	0.0564602	0.261854
PRE4g3-SAH1-NRg-4	0.0023652	-0.0147347	0.00249778	0.968859
PRE4g3-SAH1-NRg-5	0.0332685	0.38081	0.0330826	0.629903
PRE4g3-SAH1-NRg-3	0.0611311	0.737436	0.061315	0.211242
PRE4g3-ATP15-NRg-5	0.0470228	0.556857	0.0454787	0.597087
PRE4g3-SCD5-TRg-5	0.073668	0.897901	0.073052	0.507837
PRE4g3-ARB1-NRg-2	-0.00767954	-0.143302	-0.00650167	0.733261
PRE4g3-ARB1-NRg-4	0.0132581	0.124689	0.0153183	0.832887
PRE4g3-PUP2-TRg-1	0.04557	0.538263	0.0452146	0.346406
PRE4g3-CCT8-TRg-2	NA	NA	NA	NA
PRE4g3-MCM4-TRg-1	-0.029654	-0.424562	-0.0306914	0.648328
PRE4g3-LSM4-TRg-1	-0.0457207	-0.630207	-0.0434735	0.524035
PRE4g3-NOP53-NRg-1	-0.0356579	-0.501409	-0.0363036	0.637093
PRE4g3-ATP3-TRg-4	0.0457005	0.539934	0.0463092	0.598151
PRE4g3-AFG2-NRg-3	-0.0126149	-0.206472	-0.010357	0.337418
PRE4g3-PRO3-NRg-3	-0.0239446	-0.351485	-0.0212339	0.581054
PRE4g3-NRD1-NRg-10	0.119229	1.48105	0.11807	0.361755
PRE4g3-SEC61-TRg-2	-0.0375899	-0.526138	-0.0356204	0.470763
PRE4g3-RHO3-TRg-4	0.0568793	0.683015	0.0586774	0.272625
PRE4g3-SNF2-TRg-6	-0.0539212	-0.73517	-0.0516133	0.520773
PRE4g3-SMD2-NRg-3	0.0246193	0.270105	0.0253978	0.68021
PRE4g3-RSC4-TRg-2	0.00560091	0.0266805	0.00644261	0.982047
PRE4g3-RSC4-TRg-1	0.124825	1.55269	0.124346	0.35061
PRE4g3-TIF34-TRg-2	0.00418133	0.0085107	0.0020088	0.951658
PRE4g3-BET1-NRg-1	0.0528619	0.631595	0.0516602	0.387942
PRE4g3-CDC8-NRg-2	-0.0221597	-0.32864	-0.0199586	0.531881
PRE4g3-PRP42-TRg-2	0.0188261	0.195955	0.0201616	0.65066
PRE4g3-RRB1-TRg-2	-0.0203588	-0.30559	-0.01849	0.630186
PRE4g3-SPC24-TRg-1	-0.00481992	-0.1067	-0.00509442	0.845352
PRE4g3-ILS1-NRg-1	0.0317224	0.361021	0.0328256	0.526739
PRE4g3-GFA1-TRg-2	0.0258353	0.28567	0.0262381	0.759331
PRE4g3-SEC21-NRg-10	0.0709604	0.863245	0.0701411	0.389798
PRE4g3-RPC10-NRg-1	0.0458084	0.541314	0.0448076	0.500896
PRE4g3-RPB10-TRg-3	0.0401925	0.469434	0.0397491	0.710726
PRE4g3-RPB10-TRg-2	0.0498313	0.592805	0.0504064	0.445477
PRE4g3-YNL181W-TRg-1	-0.0367396	-0.515255	-0.0361134	0.554793
PRE4g3-RAD3-NRg-1	0.0139838	0.133977	0.0154182	0.570066
PRE4g3-NOP10-TRg-1	0.0275242	0.307286	0.0278996	0.79938
PRE4g3-BFR2-TRg-3	-0.00669316	-0.130677	-0.00643209	0.846504
PRE4g3-MCM2-TRg-6	-0.030908	-0.440613	-0.0293382	0.577559
PRE4g3-MCM2-TRg-4	-0.0197864	-0.298263	-0.0181112	0.455145
PRE4g3-MPP10-TRg-1	-0.00500696	-0.109094	-0.00541616	0.799871
PRE4g3-RET2-TRg-4	0.120229	1.49386	0.118311	0.326274
PRE4g3-RET2-TRg-1	0.155202	1.94149	0.153583	0.182684
PRE4g3-RPS2-NRg-1	-0.0775337	-1.0374	-0.0784038	0.349232
PRE4g3-RPS2-NRg-2	-0.080135	-1.07069	-0.0813063	0.47735
PRE4g3-ORC4-NRg-3	-0.000198991	-0.047555	0.000948707	0.845309
PRE4g3-TIP20-TRg-7	-0.0260257	-0.378122	-0.0247858	0.473282
PRE4g3-SMT3-TRg-1	-0.0480677	-0.660247	-0.0470859	0.297605
PRE4g3-MSS18-NRg-6	-0.0819527	-1.09396	-0.0797967	0.349785
PRE4g3-YEF3-NRg-9	0.0506661	0.60349	0.0466689	0.433646
PRE4g3-ASK1-NRg-1	-0.0360689	-0.50667	-0.0351929	0.474221
PRE4g3-SMC1-TRg-1	-0.0928814	-1.23384	-0.093295	0.266882
PRE4g3-NIP1-NRg-1	-0.0278123	-0.400989	-0.0276194	0.391192
PRE4g3-RPP1-NRg-1	-0.0758341	-1.01564	-0.0750125	0.563682
PRE4g3-YDJ1-TRg-6	-0.0389728	-0.543838	-0.0393889	0.485807
PRE4g3-SUB2-NRg-1	0.0476076	0.564343	0.0487536	0.322881
PRE4g3-TIM10-NRg-8	0.0163473	0.164228	0.0175655	0.583694
PRE4g3-TIM10-NRg-4	-0.0117067	-0.194848	-0.0103362	0.345191
PRE4g3-TIM10-NRg-7	-0.0134215	-0.216795	-0.0124098	0.493912
PRE4g3-SKI6-TRg-4	0.0247664	0.271988	0.0255762	0.740313
PRE4g3-TUB4-TRg-1	-0.0422026	-0.585178	-0.0410556	0.413299
PRE4g3-CDC37-NRg-2	-0.0197446	-0.297728	-0.0186553	0.528227
PRE4g3-ISD11-TRg-3	0.0227506	0.246188	0.0238309	0.526101
PRE4g3-YOS1-TRg-4	-0.0566	-0.769457	-0.055068	0.381929
PRE4g3-SSC1-TRg-6	-0.0678023	-0.91284	-0.0678914	0.259248
PRE4g3-MTR3-TRg-5	0.0211514	0.225718	0.0219109	0.691042
PRE4g3-MTR3-TRg-6	0.0229639	0.248917	0.025004	0.699959
PRE4g3-TFA1-TRg-2	0.0546308	0.654235	0.0550309	0.464713
PRE4g3-CDC3-NRg-3	-0.120969	-1.59335	-0.120747	0.318167
PRE4g3-ERG25-TA-18	-0.00891232	-0.159081	-0.00973804	0.748871
PRE4g3-RPB11-TRg-4	0.0440466	0.518764	0.0450536	0.601077
PRE4g3-RPB11-TRg-1	-0.000914585	-0.0567142	-0.00315532	0.702223
PRE4g3-RPB11-TRg-2	0.0205865	0.218487	0.0193259	0.43375
PRE4g3-DED1-TRg-3	0.0623872	0.753513	0.0620851	0.470475
PRE4g3-DED1-TRg-1	-0.021133	-0.315498	-0.0200967	0.590125
PRE4g3-DED1-TRg-6	0.0274332	0.306122	0.0274954	0.711169
PRE4g3-DED1-TRg-4	0.0708423	0.861734	0.0708567	0.272988
PRE4g3-RPL10-NRg-5	0.00852782	0.0641434	0.00966471	0.95079
PRE4g3-RPL10-NRg-4	-0.0387094	-0.540467	-0.0371143	0.444602
PRE4g3-EFB1-NRg-1	0.0601564	0.72496	0.0611316	0.491173
PRE4g3-EFB1-NRg-5	0.00561764	0.0268947	0.00665819	0.966184
PRE4g3-EFB1-NRg-4	0.0827927	1.01469	0.0828235	0.254001
PRE4g3-RPT3-NRg-1	-0.141714	-1.85887	-0.141424	0.198005
PRE4g3-SAC6-TRg-8	-0.152855	-2.00146	-0.15101	0.254351
PRE4g3-SAC6-TRg-4	-0.104133	-1.37785	-0.103122	0.193074
PRE4g3-SAC6-TRg-5	-0.0775471	-1.03757	-0.0765144	0.286244
PRE4g3-SAC6-TRg-3	-0.119066	-1.56899	-0.117321	0.211242
PRE4g3-DIM1-TRg-5	-0.045764	-0.630762	-0.0454361	0.475561
PRE4g3-DIM1-TRg-7	-0.0322318	-0.457557	-0.0308669	0.686817
PRE4g3-RPC17-NRg-1	0.0971152	1.19801	0.0977613	0.34263
PRE4g3-RPC17-NRg-2	0.121835	1.51442	0.122038	0.324737
PRE4g3-YDR341C-TRg-1	0.0631659	0.76348	0.0620237	0.508673
PRE4g3-RAP1-NRg-8	-0.0721952	-0.969067	-0.0694702	0.193074
PRE4g3-RAP1-NRg-5	-0.0288982	-0.414888	-0.0297243	0.636033
PRE4g3-RAP1-NRg-2	-0.0288461	-0.414223	-0.0269475	0.606254
PRE4g3-SEC26-NRg-3	0.0610252	0.736081	0.0617086	0.383969
PRE4g3-SPP41-TRg-3	0.0740935	0.903347	0.0729859	0.276649
PRE4g3-TAP42-NRg-1	0.0033399	-0.00225908	0.00456073	0.992187
PRE4g3-PGA2-TRg-6	-0.0250521	-0.365661	-0.0238729	0.593868
PRE4g3-BRL1-TRg-1	0.0528847	0.631886	0.051244	0.592749
PRE4g3-FOL2-TRg-1	0.00541274	0.024272	0.00756405	0.943958
PRE4g3-NAB3-NRg-5	-0.00147103	-0.0638363	-0.000130233	0.958759
PRE4g3-SNF4-TRg-4	0.0235955	0.257001	0.0222778	0.748075
PRE4g3-HRR25-TRg-2	-0.0598709	-0.811322	-0.0607207	0.41573
PRE4g3-TRS23-TRg-4	0.0914403	1.12538	0.0898577	0.30305
PRE4g3-CTR86-TRg-4	0.00996386	0.0825239	0.0109878	0.831309
PRE4g3-RPB5-TRg-5	-0.0704522	-0.946757	-0.0730181	0.291415
PRE4g3-SPN1-NRg-2	0.0167767	0.169724	0.0151253	0.908798
PRE4g3-SPN1-NRg-1	-0.0738741	-0.990556	-0.0750629	0.60932
PRE4g3-SEC61-NRg-1	-0.0685793	-0.922785	-0.0677363	0.337888
PRE4g3-SEC61-NRg-7	-0.0917664	-1.21957	-0.0904057	0.264642
PRE4g3-TUS1-TRg-3	0.0226853	0.245351	0.0237016	0.409206
PRE4g3-OLE1-NRg-2	-0.0835556	-1.11447	-0.0844875	0.364479
PRE4g3-AFG2-TRg-1	0.0829617	1.01686	0.0823569	0.309297
PRE4g3-TOA2-NRg-1	0.112839	1.39927	0.112595	0.140242
PRE4g3-USO1-TRg-1	0.0286866	0.322165	0.0273678	0.667399
PRE4g3-UTP22-NRg-2	0.0261838	0.290131	0.0268478	0.675162
PRE4g3-RIB1-TRg-3	-0.0692106	-0.930865	-0.06948	0.279522
PRE4g3-RIB1-TRg-7	-0.0173449	-0.267013	-0.0183598	0.801679
PRE4g3-RIB1-TRg-4	-0.0676899	-0.911401	-0.0680237	0.183246
PRE4g3-COG1-TRg-1	0.0395266	0.460911	0.0365969	0.749159
PRE4g3-RPL32-NRg-2	-0.0336332	-0.475494	-0.0337549	0.294635
PRE4g3-GLC7-NRg-3	-0.0814578	-1.08762	-0.0808967	0.337042
PRE4g3-GLC7-NRg-4	0.0260074	0.287872	0.025314	0.836314
PRE4g3-HSF1-TRg-2	0.0330704	0.378275	0.0342017	0.371738
PRE4g3-DAM1-NRg-5	-0.00165625	-0.066207	-0.000957321	0.950547
PRE4g3-SEC18-TRg-4	0.0626122	0.756393	0.061691	0.285929
PRE4g3-SEC18-TRg-5	0.0463148	0.547796	0.0456771	0.382982
PRE4g3-PAB1-NRg-3	0.0717168	0.872927	0.0710283	0.278051
PRE4g3-POP8-TRg-2	0.0645368	0.781027	0.065294	0.381672
PRE4g3-PAB1-NRg-4	0.119371	1.48287	0.118192	0.253365
PRE4g3-BIG1-TRg-4	-0.0353352	-0.497279	-0.0357165	0.449879
PRE4g3-BIG1-TRg-5	0.0117272	0.105094	0.0118235	0.822042
PRE4g3-BIG1-TRg-6	-0.016297	-0.2536	-0.0160453	0.877911
PRE4g3-RPO41-NRg-1	0.0886513	1.08968	0.0892575	0.320176
PRE4g3-RVB2-NRg-2	-0.027689	-0.399412	-0.0261361	0.675162
PRE4g3-PET117-NRg-8	0.0938045	1.15564	0.092583	0.173515
PRE4g3-VPS45-NRg-9	0.130804	1.62921	0.130413	0.159349
PRE4g3-YCG1-NRg-1	0.064116	0.775641	0.0645106	0.180326
PRE4g3-NOC4-NRg-1	0.0160862	0.160886	0.0169492	0.730465
PRE4g3-NMD3-NRg-2	0.0103652	0.0876604	0.0119153	0.760902
PRE4g3-DRS1-TRg-2	0.0169299	0.171685	0.0185122	0.847022
PRE4g3-HTB1-NRg-2	0.0150737	0.147927	0.0155062	0.869586
PRE4g3-IPI1-TRg-2	0.0766113	0.935573	0.0766449	0.347128
PRE4g3-SEC18-NRg-1	-0.0138027	-0.221674	-0.0172311	0.809422
PRE4g3-SEC18-NRg-2	0.0337946	0.387545	0.030129	0.762838
PRE4g3-JIP5-NRg-2	0.0219883	0.236431	0.0242338	0.796925
PRE4g3-YPT1-TRg-3	0.0399799	0.466713	0.0377785	0.642584
PRE4g3-YPT1-TRg-2	0.00489441	0.0176378	0.000190993	0.968206
PRE4g3-CLF1-NRg-2	0.016728	0.169101	0.0170536	0.82838
PRE4g3-SNF2-NRg-7	-0.0741866	-0.994555	-0.0719885	0.365173
PRE4g3-SNF2-NRg-4	-0.0738213	-0.989879	-0.0709636	0.38849
PRE4g3-RPL25-NRg-1	-0.00377631	-0.0933426	-0.00554696	0.80515
PRE4g3-NOP56-TRg-1	0.021391	0.228785	0.0234103	0.802187
PRE4g3-NOP56-TRg-2	0.0186763	0.194038	0.0203847	0.814364
PRE4g3-TRS31-TRg-1	0.0316354	0.359907	0.0288422	0.773567
PRE4g3-DBF4-TRg-2	0.010972	0.0954273	0.00882579	0.961162
PRE4g3-DBF4-TRg-1	-0.0106121	-0.180837	-0.0111643	0.621366
PRE4g3-RPC19-TRg-4	0.0477603	0.566297	0.0483572	0.486637
PRE4g3-RPC19-TRg-6	0.0307459	0.348522	0.0308287	0.840745
PRE4g3-RPC19-TRg-3	0.0938964	1.15681	0.0939558	0.320344
PRE4g3-ROK1-NRg-1	-0.0484023	-0.664531	-0.0474958	0.629856
PRE4g3-CDC33-TRg-4	-0.0536738	-0.732003	-0.0523594	0.528062
PRE4g3-DHR2-TRg-3	0.0640353	0.774609	0.0644558	0.432221
PRE4g3-RRP42-NRg-5	-0.0181421	-0.277216	-0.0169699	0.728149
PRE4g3-CLF1-TRg-1	-0.0159095	-0.248641	-0.016536	0.825493
PRE4g3-ERG11-NA-16	-0.0839962	-1.12011	-0.0837332	0.328849
PRE4g3-VAS1-NRg-4	0.0223876	0.241541	0.0217695	0.318196
PRE4g3-PIK1-NRg-2	0.00672254	0.0410368	0.00662414	0.974317
PRE4g3-SAR1-NRg-7	-0.155044	-2.02948	-0.154985	0.254351
PRE4g3-SAR1-NRg-4	-0.0406404	-0.565182	-0.0423901	0.585837
PRE4g3-RPS3-TRg-1	-0.0884807	-1.17751	-0.0899261	0.335194
PRE4g3-YTM1-TRg-2	-0.0258324	-0.375648	-0.0247066	0.594929
PRE4g3-SUI3-NRg-5	-0.0559424	-0.76104	-0.0548838	0.301023
PRE4g3-SUI3-NRg-2	-0.0598722	-0.811339	-0.0581017	0.434378
PRE4g3-RRP7-TRg-4	-0.00758417	-0.142081	-0.00610495	0.855086
PRE4g3-RRP7-TRg-6	-0.0340278	-0.480546	-0.0344315	0.498887
PRE4g3-NIP7-TRg-2	0.0179228	0.184394	0.0187143	0.752664
PRE4g3-MDM35-TRg-1	0.00201531	-0.0192131	0.00267883	0.98516
PRE4g3-ALA1-NRg-1	0.00602052	0.0320514	0.00741694	0.911917
PRE4g3-DOA4-NRg-2	-0.0278738	-0.401777	-0.0265284	0.627317
PRE4g3-RPS13-NRg-1	-0.0388027	-0.54166	-0.0400983	0.655344
PRE4g3-YSF3-TRg-2	-0.0409876	-0.569627	-0.03897	0.247291
PRE4g3-RPS2-NRg-11	-0.103365	-1.36802	-0.104088	0.332607
PRE4g3-SSL1-TRg-10	0.0166082	0.167568	0.0173542	0.626981
PRE4g3-NIP7-TRg-1	0.0774183	0.945903	0.0785253	0.20081
PRE4g3-LST8-NRg-1	-0.112674	-1.48717	-0.114496	0.351229
PRE4g3-TAF4-TRg-3	0.0455272	0.537715	0.0420862	0.694788
PRE4g3-HAS1-TRg-2	0.0633222	0.765481	0.0628031	0.383806
PRE4g3-GLC7-TRg-2	-0.210635	-2.74102	-0.216323	0.480349
PRE4g3-CDC45-NRg-1	0.0283246	0.317531	0.0283732	0.516115
PRE4g3-SEC22-NRg-8	0.130342	1.62329	0.129268	0.297605
PRE4g3-YOS1-TRg-2	0.00606555	0.0326276	0.00571086	0.976957
PRE4g3-RBA50-TRg-3	-0.0441014	-0.609482	-0.0423776	0.36165
PRE4g3-SPP41-NRg-2	0.0182337	0.188374	0.0185231	0.644439
PRE4g3-PRP46-TRg-2	-0.0136897	-0.220229	-0.0123533	0.681707
PRE4g3-PGA2-NRg-1	0.0283314	0.317618	0.02965	0.669449
PRE4g3-CBF5-TRg-3	0.00551083	0.0255276	0.00740099	0.813267
PRE4g3-TCP1-NRg-3	0.0314448	0.357468	0.0321874	0.611261
PRE4g3-TCP1-NRg-2	0.0877887	1.07864	0.0878753	0.260537
PRE4g3-ERG26-NRg-2	-0.00562584	-0.117016	-0.00627706	0.326028
PRE4g3-ERG26-NRg-4	0.0246626	0.270659	0.024322	0.81565
PRE4g3-MES1-TRg-5	-0.0263569	-0.382362	-0.0248467	0.538252
PRE4g3-HTS1-TRg-2	0.0620435	0.749114	0.0631023	0.287017
PRE4g3-SSS1-TRg-3	-0.00394348	-0.0954824	-0.0040773	0.899464
PRE4g3-SSS1-TRg-2	-0.045293	-0.624733	-0.0460753	0.603258
PRE4g3-SYS1-TRg-7	0.0179945	0.185311	0.0169987	0.358447
PRE4g3-SYS1-TRg-2	0.0717912	0.873879	0.0697177	0.237113
PRE4g3-SYS1-TRg-1	0.0850623	1.04374	0.0829108	0.188148
PRE4g3-BFR2-TRg-1	0.00160274	-0.0244938	0.00244599	0.969568
PRE4g3-EOS1-TRg-3	-0.0988371	-1.31007	-0.0986019	0.285929
PRE4g3-TAF4-NRg-1	0.0226998	0.245536	0.0204497	0.722073
PRE4g3-ARL3-NRg-8	0.0994859	1.22836	0.100143	0.46482
PRE4g3-RPN5-NRg-1	-0.00396536	-0.0957625	-0.00276275	0.903593
PRE4g3-TIM9-NRg-2	0.00373532	0.00280208	0.00487356	0.981773
PRE4g3-NUP57-NRg-3	0.0685541	0.832446	0.0674349	0.463959
PRE4g3-VPS4-TRg-1	0.0179936	0.1853	0.0172256	0.867235
PRE4g3-CDC3-TRg-4	-0.0784137	-1.04866	-0.0778602	0.300484
PRE4g3-BBP1-NRg-1	-0.0521318	-0.712267	-0.0513052	0.652915
PRE4g3-BBP1-NRg-2	-0.128609	-1.69114	-0.129299	0.347404
PRE4g3-USE1-NRg-3	-0.0360035	-0.505832	-0.0359368	0.291415
PRE4g3-CCT7-TRg-1	0.0204013	0.216118	0.0225905	0.451495
PRE4g3-SAH1-TRg-3	-0.0619255	-0.837619	-0.0608047	0.426175
PRE4g3-CHS2-TRg-1	-0.0195476	-0.295206	-0.0184533	0.678505
PRE4g3-DPM1-TRg-2	-0.0601533	-0.814936	-0.0586766	0.494953
PRE4g3-BBP1-TRg-1	0.00295916	-0.00713239	0.000407716	0.802105
PRE4g3-NRD1-TRg-4	0.0661102	0.801166	0.0654391	0.406904
PRE4g3-RPB3-NRg-1	-0.00776917	-0.144449	-0.00940249	0.873002
PRE4g3-PHO85-NRg-6	-0.0276002	-0.398276	-0.0276803	0.305748
PRE4g3-SNF6-TRg-6	-0.0866045	-1.1535	-0.0861791	0.297372
PRE4g3-PRP38-NRg-2	0.103788	1.28342	0.102737	0.23813
PRE4g3-OAR1-NRg-3	0.0340247	0.390489	0.035293	0.181354
PRE4g3-ROX3-NRg-1	-0.0214311	-0.319315	-0.0197292	0.306621
PRE4g3-YPP1-TRg-6	0.0420756	0.493536	0.0414896	0.444585
PRE4g3-CBF2-NRg-8	-0.0542068	-0.738825	-0.0521292	0.411713
PRE4g3-SPT6-TRg-5	-0.0834305	-1.11287	-0.0843824	0.432505
PRE4g3-SEC10-NRg-1	-0.0208917	-0.31241	-0.0227433	0.454986
PRE4g3-NSL1-NRg-3	0.0219284	0.235663	0.0190091	0.654726
PRE4g3-NRD1-NRg-8	0.12343	1.53482	0.123911	0.25777
PRE4g3-RPB3-TRg-1	0.00994839	0.0823258	0.00954044	0.840263
PRE4g3-NRD1-NRg-4	0.0581045	0.698698	0.0586519	0.578187
PRE4g3-RVB1-TRg-2	-0.0412059	-0.572421	-0.0426633	0.565147
PRE4g3-TIF5-NRg-8	0.175054	2.19558	0.174256	0.203848
PRE4g3-EOS1-NRg-1	-0.0606239	-0.820961	-0.0613167	0.472208
PRE4g3-ERG25-NA-26	-0.000381275	-0.0498881	-0.000361943	0.910565
PRE4g3-MSL5-NRg-4	-0.0467888	-0.643879	-0.0444396	0.531584
PRE4g3-SEC24-TRg-2	0.00812537	0.0589922	0.00523323	0.94744
PRE4g3-RPL30-NRg-5	-0.0590567	-0.800901	-0.0603392	0.391477
PRE4g3-SNU71-NRg-3	0.0302358	0.341994	0.0322518	0.548776
PRE4g3-CDC33-NRg-1	-0.0107328	-0.182382	-0.0100156	0.818838
PRE4g3-RPN6-TRg-4	-0.0179588	-0.27487	-0.0171394	0.697409
PRE4g3-NAB2-TRg-4	0.0555833	0.666427	0.0546785	0.436255
PRE4g3-NAB2-TRg-6	0.0184262	0.190837	0.0194631	0.772075
PRE4g3-YTM1-NRg-1	0.0352972	0.406777	0.0368623	0.357678
PRE4g3-OLE1-TRg-8	-0.0734176	-0.984712	-0.0731121	0.292873
PRE4g3-OLE1-TRg-1	-0.00401141	-0.0963518	-0.00361234	0.867795
PRE4g3-UTP7-TRg-4	-0.0454214	-0.626376	-0.0448577	0.283573
PRE4g3-ACT1-NRg-6	-0.158159	-2.06936	-0.158739	0.180326
PRE4g3-RPL18A-NRg-3	0.00377405	0.0032977	0.00268143	0.963518
PRE4g3-BRX1-NRg-1	0.0130228	0.121676	0.013967	0.65286
PRE4g3-NAF1-TRg-8	-0.010495	-0.179338	-0.00897716	0.748543
PRE4g3-NAF1-TRg-6	0.0236269	0.257403	0.0246253	0.633493
PRE4g3-NAF1-TRg-4	0.0297667	0.335989	0.0306094	0.787996
PRE4g3-CDC8-TRg-2	0.012057	0.109315	0.0138341	0.906184
PRE4g3-NSE4-TRg-1	0.0259128	0.286661	0.0263173	0.760929
PRE4g3-PAB1-NRg-2	0.0423371	0.496883	0.0410859	0.450914
PRE4g3-PRP43-TRg-4	-0.00618019	-0.124111	-0.00737634	0.795502
PRE4g3-SEC2-NRg-3	-0.0526403	-0.718775	-0.0520106	0.459799
PRE4g3-SEC2-NRg-6	0.00442478	0.0116267	0.00517851	0.975832
PRE4g3-MPP10-NRg-5	-0.00763217	-0.142696	-0.00682865	0.193074
PRE4g3-YDR355C-TRg-2	-0.0117767	-0.195743	-0.0118038	0.381795
PRE4g3-YLR339C-TRg-9	0.0217995	0.234013	0.021416	0.740539
PRE4g3-SNM1-TRg-2	0.0208409	0.221743	0.0218673	0.628539
PRE4g3-ALR1-NRg-4	-0.118059	-1.5561	-0.119096	0.272988
PRE4g3-ALR1-NRg-1	-0.074745	-1.0017	-0.0755497	0.426951
PRE4g3-ALR1-NRg-3	-0.0761713	-1.01996	-0.0766627	0.570066
PRE4g3-RPL10-TRg-1	-0.0108532	-0.183923	-0.00984669	0.783887
PRE4g3-RPL28-TRg-2	-0.038356	-0.535943	-0.037737	0.368812
PRE4g3-UTP25-TRg-1	0.016289	0.163483	0.0175097	0.876959
PRE4g3-POB3-TRg-1	0.0430561	0.506086	0.0427483	0.320176
PRE4g3-POB3-TRg-3	0.0444966	0.524523	0.0427898	0.491445
PRE4g3-POB3-TRg-2	0.0514309	0.613279	0.0520098	0.697785
PRE4g3-MED11-TRg-1	-0.00696365	-0.134139	-0.00731823	0.577053
PRE4g3-ISA1-TRg-15	-0.0790896	-1.05731	-0.0835465	0.613248
PRE4g3-RRP1-NRg-1	-0.0959827	-1.27353	-0.09484	0.372457
PRE4g3-MES1-NRg-1	0.0475991	0.564234	0.0463099	0.424218
PRE4g3-SEC13-NRg-5	-0.11583	-1.52757	-0.119596	0.311998
PRE4g3-MCM2-NRg-2	-0.00761611	-0.14249	-0.00636905	0.65123
PRE4g3-ALA1-TRg-4	-0.0123476	-0.20305	-0.0127662	0.698463
PRE4g3-MTG2-TRg-5	0.112551	1.39558	0.11248	0.20779
PRE4g3-TIF35-NRg-3	0.0745753	0.909514	0.0755194	0.323622
PRE4g3-NSE1-TRg-3	-0.0025303	-0.0773944	-0.000308828	0.934328
PRE4g3-NSE1-TRg-4	0.0216865	0.232567	0.0226147	0.654252
PRE4g3-MOB2-NRg-6	0.0257546	0.284636	0.0244795	0.480799
PRE4g3-VRG4-NRg-3	-0.112515	-1.48514	-0.112298	0.100475
PRE4g3-PRP9-TRg-3	0.0255662	0.282225	0.0251822	0.770652
PRE4g3-HYM1-TRg-5	0.00948162	0.0763515	0.00710584	0.964082
PRE4g3-POP1-TRg-5	-0.0037363	-0.0928306	-0.00336584	0.81469
PRE4g3-POP1-TRg-9	0.0151819	0.149311	0.0162662	0.81177
PRE4g3-RPL17A-TRg-1	-0.0469942	-0.646508	-0.0458211	0.504459
PRE4g3-SLD2-TRg-1	0.00675361	0.0414345	0.00589243	0.934934
PRE4g3-CDC48-NRg-7	0.0735261	0.896085	0.0749041	0.276571
PRE4g3-FHL1-NRg-2	-0.0182728	-0.278889	-0.0172128	0.796371
PRE4g3-BET3-NRg-7	0.0531727	0.635573	0.0542219	0.474281
PRE4g3-MAK21-TRg-1	0.0486251	0.577366	0.0493722	0.415805
PRE4g3-BRN1-TRg-4	0.0377286	0.437897	0.0354015	0.38376
PRE4g3-FBA1-NRg-3	-0.0831239	-1.10895	-0.0816193	0.367314
PRE4g3-CDC42-TRg-6	-0.116962	-1.54205	-0.117432	0.769922
PRE4g3-CDC42-TRg-7	-0.00747516	-0.140686	-0.00809542	0.679522
PRE4g3-COG4-NRg-1	-0.00712356	-0.136186	-0.00680691	0.845301
PRE4g3-ATP3-NRg-3	0.0502016	0.597544	0.0516805	0.430905
PRE4g3-ATP3-NRg-2	0.0235825	0.256835	0.0249312	0.628391
PRE4g3-SMP3-TRg-5	-0.0323025	-0.458462	-0.0302965	0.384484
PRE4g3-CFT2-NRg-2	0.0388294	0.451987	0.0379291	0.0183754
PRE4g3-FAS2-TRg-5	-0.0103739	-0.177788	-0.0102466	0.8656
PRE4g3-DBP2-NRg-3	0.0228276	0.247173	0.0242741	0.66933
PRE4g3-DBP2-NRg-2	0.0365583	0.422917	0.0375592	0.624669
PRE4g3-MPS2-NRg-4	-0.0791283	-1.05781	-0.0794376	0.267933
PRE4g3-ARC35-TRg-2	-0.0440865	-0.60929	-0.0456552	0.507993
PRE4g3-ARC35-TRg-5	-0.121624	-1.60172	-0.12856	0.366474
PRE4g3-MRD1-TRg-1	0.00962323	0.078164	0.00989766	0.94744
PRE4g3-RLP7-TRg-1	0.0231585	0.251408	0.0237633	0.679835
PRE4g3-SPC34-TRg-1	-0.0299861	-0.428813	-0.0301614	0.394417
PRE4g3-CDC45-TRg-2	0.00232461	-0.0152542	0.00375525	0.985312
PRE4g3-GCD6-TRg-3	0.0214002	0.228902	0.0218301	0.760003
PRE4g3-GCD6-TRg-4	0.0037979	0.00360297	0.00441086	0.996577
PRE4g3-YPT6-NRg-2	0.0468378	0.55449	0.0436211	0.490517
PRE4g3-RPS13-TRg-2	-0.0404594	-0.562866	-0.0406428	0.324985
PRE4g3-IPI3-TRg-3	0.0207582	0.220685	0.0222404	0.503581
PRE4g3-TIF5-NRg-9	-0.0225834	-0.334063	-0.0239459	0.561348
PRE4g3-TIF5-NRg-7	0.0731051	0.890697	0.0740962	0.228204
PRE4g3-TIF5-NRg-6	0.0468076	0.554103	0.0461145	0.444153
PRE4g3-NAB3-TRg-3	0.0338887	0.388748	0.0316005	0.498367
PRE4g3-GCD2-TRg-1	0.0587654	0.707156	0.0579088	0.371633
PRE4g3-UBA1-TRg-2	0.0995607	1.22931	0.0992055	0.259729
PRE4g3-SLD3-TRg-6	0.0284899	0.319647	0.0272327	0.458377
PRE4g3-LCB1-TRg-5	-0.0240043	-0.35225	-0.0226046	0.380429
PRE4g3-TOA2-TRg-6	0.0622138	0.751294	0.0615082	0.418547
PRE4g3-TOA2-TRg-1	0.0206349	0.219107	0.0208863	0.840407
PRE4g3-TOA2-TRg-3	0.0125484	0.115604	0.012844	0.929453
PRE4g3-LSM2-TRg-1	-0.0560306	-0.762169	-0.0543585	0.46998
PRE4g3-YML6-TRg-13	-0.0282795	-0.40697	-0.0270585	0.731445
PRE4g3-YML6-TRg-12	-0.0654202	-0.88235	-0.06369	0.540474
PRE4g3-UTP15-NRg-1	0.0294066	0.33138	0.0293006	0.509334
PRE4g3-TIF6-NRg-8	-0.00661147	-0.129631	-0.00563336	0.587896
PRE4g3-SUP35-NRg-1	0.0482444	0.572493	0.0480105	0.406735
PRE4g3-MPP10-NRg-1	-0.0286017	-0.411093	-0.0276015	0.667201
PRE4g3-SWI3-TRg-7	-0.096314	-1.27777	-0.0952325	0.191555
PRE4g3-SSN3-NRg-2	-0.0281999	-0.405951	-0.026547	0.646188
PRE4g3-SEC13-NRg-7	0.00564874	0.0272927	0.00383427	0.996511
PRE4g3-RPS15-NRg-3	-0.0369937	-0.518507	-0.0384896	0.446939
PRE4g3-RPL3-TRg-2	-0.00490634	-0.107806	-0.0038718	0.937925
PRE4g3-FBA1-NRg-2	-0.0538264	-0.733956	-0.0525926	0.311347
PRE4g3-FBA1-NRg-1	-0.0810756	-1.08273	-0.0793595	0.19436
PRE4g3-FBA1-NRg-5	-0.07552	-1.01162	-0.0736172	0.248979
PRE4g3-DAM1-TRg-2	-0.0352814	-0.496591	-0.0389286	0.693126
PRE4g3-NHP2-TRg-2	0.0335908	0.384936	0.0352254	0.664445
PRE4g3-HCA4-NRg-6	-0.0143547	-0.22874	-0.0140925	0.791248
PRE4g3-PRE3-TRg-4	-0.0344397	-0.485817	-0.0371895	0.633015
PRE4g3-DBP5-NRg-4	0.038104	0.442702	0.038518	0.328527
PRE4g3-SPT6-NRg-4	-0.0928508	-1.23345	-0.0921432	0.263192
PRE4g3-SPT6-NRg-2	-0.114151	-1.50607	-0.112927	0.411096
PRE4g3-RPL18A-TRg-4	-0.0383075	-0.535323	-0.0381244	0.503223
PRE4g3-KSH1-TRg-1	-0.0116407	-0.194003	-0.0107781	0.501399
PRE4g3-KSH1-TRg-3	-0.00774849	-0.144184	-0.00655912	0.84639
PRE4g3-IPI3-NRg-1	0.0261712	0.289969	0.0265914	0.590721
PRE4g3-PGA2-TRg-8	0.0478867	0.567915	0.0500907	0.254001
PRE4g3-RPL18A-TRg-2	-0.0122865	-0.202268	-0.0109463	0.843215
PRE4g3-RPL33A-NRg-6	-0.0168059	-0.260114	-0.0174839	0.841171
PRE4g3-TAF12-NRg-2	-0.0308687	-0.440111	-0.0303021	0.640853
PRE4g3-USE1-TRg-5	-0.0250543	-0.365689	-0.0228845	0.422995
PRE4g3-YNL114C-TRg-1	0.0808802	0.990214	0.0818953	0.302954
PRE4g3-SMC5-TRg-7	-0.020098	-0.302252	-0.0194373	0.793475
PRE4g3-SMC5-TRg-6	0.0121446	0.110437	0.0137679	0.8509
PRE4g3-RSC58-TRg-1	0.0970338	1.19697	0.0973807	0.236038
PRE4g3-CTF13-TRg-2	-0.00832565	-0.151572	-0.00946716	0.811644
PRE4g3-NAB2-NRg-2	0.0792057	0.968781	0.0787163	0.297372
PRE4g3-MCM7-TRg-4	-0.12308	-1.62036	-0.123903	0.328386
PRE4g3-BCP1-NRg-5	0.0321532	0.366535	0.0311124	0.442097
PRE4g3-STU2-TRg-3	-0.0140809	-0.225235	-0.0153235	0.595111
PRE4g3-SEC21-NRg-6	0.0870146	1.06873	0.0858542	0.396181
PRE4g3-SEC21-NRg-3	0.0583978	0.702451	0.056779	0.31901
PRE4g3-RPL1B-TRg-3	-0.00934036	-0.164559	-0.00847135	0.795795
PRE4g3-SEC20-NRg-2	0.00464325	0.014423	0.00624703	0.979317
PRE4g3-VMA3-NRg-2	-0.0393252	-0.548349	-0.0387114	0.520773
PRE4g3-SEC23-NRg-5	-0.0813417	-1.08614	-0.0803956	0.211242
PRE4g3-CDC28-TRg-4	-0.115626	-1.52496	-0.114714	0.184068
PRE4g3-RPN12-NRg-11	0.0736869	0.898143	0.0740799	0.465874
PRE4g3-PUP3-TRg-3	0.0903377	1.11126	0.0893013	0.244556
PRE4g3-SEC31-TRg-2	-0.0292513	-0.419408	-0.0294065	0.33432
PRE4g3-SED5-TRg-6	0.0796505	0.974474	0.0794136	0.289786
PRE4g3-SED5-TRg-5	0.0667258	0.809045	0.0673372	0.306621
PRE4g3-RPL33A-TRg-1	-0.0292707	-0.419657	-0.0278859	0.838215
PRE4g3-RPL33A-TRg-2	-0.0496415	-0.680391	-0.0483315	0.185968
PRE4g3-MRPL11-TRg-2	0.0444996	0.524562	0.0457862	0.45068
PRE4g3-RTP1-NRg-2	-0.00889461	-0.158854	-0.00747366	0.789162
PRE4g3-NUG1-TRg-2	0.0547447	0.655694	0.0555347	0.26068
PRE4g3-VPH2-TRg-4	0.009445	0.0758828	0.0107693	0.896222
PRE4g3-COP1-NRg-3	0.0773461	0.944979	0.0764709	0.367191
PRE4g3-CRM1-NRg-1	-0.0271673	-0.392735	-0.0270392	0.664952
PRE4g3-RPL5-NRg-4	-0.0132102	-0.214091	-0.0158158	0.548253
PRE4g3-SNU13-NRg-4	-0.00171405	-0.0669469	-0.00226447	0.935581
PRE4g3-PFS2-TRg-3	-0.0740182	-0.992399	-0.0757986	0.325223
PRE4g3-MPP10-TRg-2	0.0014367	-0.026619	0.00161407	0.968206
PRE4g3-TSR4-NRg-2	-0.0221242	-0.328186	-0.020305	0.531881
PRE4g3-RSC2-TRg-1	0.0958599	1.18195	0.0968973	0.259248
PRE4g3-SEC65-TRg-2	0.0398951	0.465628	0.0404471	0.570854
PRE4g3-SMI1-NRg-1	0.0071815	0.0469112	0.00832453	0.911075
PRE4g3-RTT105-NRg-4	0.0306323	0.347068	0.0321738	0.391358
PRE4g3-VMA5-TRg-3	-0.00895334	-0.159606	-0.00782812	0.653756
PRE4g3-VMA5-TRg-5	-0.0866618	-1.15423	-0.0845937	0.27136
PRE4g3-RRP1-TRg-3	0.0132115	0.124092	0.0145008	0.615406
PRE4g3-CLC1-TRg-2	0.0720504	0.877197	0.0705939	0.347385
PRE4g3-GCD6-NRg-1	0.0612905	0.739477	0.0608455	0.549446
PRE4g3-GCD6-NRg-2	0.0208869	0.222332	0.021684	0.393721
PRE4g3-PXR1-TRg-1	0.0239877	0.262021	0.025374	0.362802
PRE4g3-CDC14-NRg-1	-0.0492816	-0.675784	-0.0484149	0.335669
PRE4g3-PCF11-TRg-6	-0.00603868	-0.1223	-0.00893807	0.827174
PRE4g3-PCF11-TRg-5	-0.0385976	-0.539036	-0.0414295	0.724125
PRE4g3-PCF11-TRg-4	-0.0640278	-0.864528	-0.0678142	0.469154
PRE4g3-SEC31-NRg-1	-0.0537129	-0.732503	-0.0581096	0.370276
PRE4g3-RRP5-NRg-1	0.0599874	0.722797	0.06083	0.424017
PRE4g3-PRE10-TRg-5	0.0157191	0.156188	0.0136907	0.929536
PRE4g3-PRE10-TRg-1	0.0620415	0.749089	0.0609378	0.295623
PRE4g3-RPS5-TRg-2	-0.0634813	-0.857534	-0.0647447	0.392747
PRE4g3-NSP1-TRg-4	0.0152985	0.150804	0.0157093	0.829627
[truncated: 13,201 more rows]

## Sheet: ypd48hr
strain	gi_score_method1	zscore_method1	gi_score_method2	qval_method2
PRE7g7-RPL15A-NRg-4	NA	NA	NA	NA
PRE7g7-RPL15A-NRg-5	NA	NA	NA	NA
PRE7g7-KRE33-TRg-1	-0.00115473	-0.0597879	0.00235772	0.978556
PRE7g7-PMI40-NRg-1	-0.0365432	-0.51274	-0.034211	0.29003
PRE7g7-NOP19-NRg-3	0.0385418	0.448306	0.0398701	0.647059
PRE7g7-SRP14-NRg-4	-0.0268806	-0.389064	-0.0197686	0.919029
PRE7g7-SEC27-TRg-2	NA	NA	NA	NA
PRE7g7-GPI14-TRg-3	-0.0114884	-0.192053	-0.0109333	0.711604
PRE7g7-PAH1-TRg-7	0.141617	1.76761	0.153899	0.45393
PRE7g7-PAH1-TRg-6	0.13688	1.70698	0.1486	0.411446
PRE7g7-PAH1-TRg-5	0.0865092	1.06226	0.0966352	0.49728
PRE7g7-PAH1-TRg-3	0.0883476	1.08579	0.0971393	0.461265
PRE7g7-COG3-TRg-1	NA	NA	NA	NA
PRE7g7-HTS1-NRg-5	0.110984	1.37553	0.113251	0.212317
PRE7g7-MSN5-TRg-7	NA	NA	NA	NA
PRE7g7-ERG26-TRg-1	NA	NA	NA	NA
PRE7g7-SMD2-TRg-5	0.055918	0.670711	0.0546471	0.54776
PRE7g7-SMD2-TRg-4	0.0612716	0.739235	0.0595286	0.56103
PRE7g7-SMD2-TRg-1	-0.0201297	-0.302656	-0.0178411	0.866374
PRE7g7-PRE7-TRg-4	-0.0679036	-0.914136	-0.05632	0.574518
PRE7g7-PRE7-TRg-7	-0.0337206	-0.476612	-0.0298251	0.556258
PRE7g7-SEC6-TRg-3	NA	NA	NA	NA
PRE7g7-ESF2-NRg-1	NA	NA	NA	NA
PRE7g7-ESF2-NRg-3	-0.0397835	-0.554215	-0.0335881	0.822395
PRE7g7-AFG2-TRg-2	0.124917	1.55387	0.128313	0.181354
PRE7g7-RRP36-TRg-3	-0.0301986	-0.431533	-0.0222237	0.829583
PRE7g7-RRP36-TRg-5	0.0243134	0.26619	0.0287135	0.87127
PRE7g7-GCR1-NRg-2	0.0323758	0.369384	0.0350551	0.693735
PRE7g7-PRE4-NRg-4	NA	NA	NA	NA
PRE7g7-PRE4-NRg-9	0.0317928	0.361922	0.0344926	0.469043
PRE7g7-DSN1-NRg-2	0.0173535	0.177107	0.0184872	0.677709
PRE7g7-GPI11-TRg-3	-0.152063	-1.99133	-0.146413	0.292592
PRE7g7-POP3-TRg-1	0.0413326	0.484027	0.0427725	0.444055
PRE7g7-MNE1-TRg-5	NA	NA	NA	NA
PRE7g7-RRP12-NRg-1	0.0159696	0.159394	0.0193416	0.704911
PRE7g7-RSC6-TRg-2	0.127671	1.58911	0.135021	0.437734
PRE7g7-CDC25-TRg-1	NA	NA	NA	NA
PRE7g7-CDC25-TRg-9	NA	NA	NA	NA
PRE7g7-YPP1-NRg-3	0.020046	0.211569	0.0296956	0.751394
PRE7g7-NFS1-NRg-9	-0.0936258	-1.24337	-0.087974	0.361755
PRE7g7-NFS1-NRg-8	-0.0313039	-0.445681	-0.0270947	0.412922
PRE7g7-UBA2-TRg-1	0.0663434	0.80415	0.0702475	0.465373
PRE7g7-ARP2-NRg-3	NA	NA	NA	NA
PRE7g7-MAK16-TRg-1	-0.0727038	-0.975577	-0.063652	0.52206
PRE7g7-CEP3-NRg-1	-0.0239427	-0.351461	-0.0117787	0.363918
PRE7g7-GUK1-TRg-5	0.120052	1.49159	0.121615	0.252784
PRE7g7-GUK1-TRg-2	0.0746292	0.910204	0.0817487	0.442948
PRE7g7-GPI12-NRg-6	NA	NA	NA	NA
PRE7g7-RPS5-NRg-5	NA	NA	NA	NA
PRE7g7-RPS5-NRg-2	-0.100175	-1.3272	-0.0958668	0.553037
PRE7g7-RPC19-NRg-1	-0.0173454	-0.267019	-0.00954377	0.926774
PRE7g7-TIM54-TRg-1	0.0374484	0.43431	0.0398862	0.609285
PRE7g7-TEN1-TRg-2	0.0164925	0.166087	0.02754	0.759745
PRE7g7-SAH1-NRg-4	-0.0888351	-1.18205	-0.0824121	0.218232
PRE7g7-SAH1-NRg-5	NA	NA	NA	NA
PRE7g7-SAH1-NRg-3	0.0272472	0.303741	0.0330659	0.699293
PRE7g7-ATP15-NRg-5	0.00701949	0.0448376	0.0169311	0.931792
PRE7g7-SCD5-TRg-5	NA	NA	NA	NA
PRE7g7-ARB1-NRg-2	0.0189266	0.197242	0.0234321	0.783005
PRE7g7-ARB1-NRg-4	0.064511	0.780697	0.0658936	0.440605
PRE7g7-PUP2-TRg-1	-0.0200779	-0.301994	-0.0133241	0.567803
PRE7g7-CCT8-TRg-2	NA	NA	NA	NA
PRE7g7-MCM4-TRg-1	NA	NA	NA	NA
PRE7g7-LSM4-TRg-1	-0.0901454	-1.19882	-0.0906226	0.44698
PRE7g7-NOP53-NRg-1	-0.118235	-1.55835	-0.108824	0.193001
PRE7g7-ATP3-TRg-4	0.165713	2.07602	0.16988	0.356409
PRE7g7-AFG2-NRg-3	0.0332311	0.380331	0.0322548	0.815077
PRE7g7-PRO3-NRg-3	-0.0379706	-0.531011	-0.0380213	0.634346
PRE7g7-NRD1-NRg-10	0.144508	1.80461	0.154577	0.258477
PRE7g7-SEC61-TRg-2	-0.0616164	-0.833663	-0.0601224	0.328072
PRE7g7-RHO3-TRg-4	0.0478219	0.567086	0.0484308	0.546959
PRE7g7-SNF2-TRg-6	-0.027425	-0.396032	-0.0302127	0.676916
PRE7g7-SMD2-NRg-3	0.0295019	0.332599	0.0325407	0.699147
PRE7g7-RSC4-TRg-2	0.175774	2.2048	0.179129	0.216329
PRE7g7-RSC4-TRg-1	0.0971629	1.19862	0.105644	0.577388
PRE7g7-TIF34-TRg-2	NA	NA	NA	NA
PRE7g7-BET1-NRg-1	NA	NA	NA	NA
PRE7g7-CDC8-NRg-2	0.04415	0.520087	0.0446282	0.582246
PRE7g7-PRP42-TRg-2	0.0279007	0.312106	0.0320743	0.736592
PRE7g7-RRB1-TRg-2	-0.0590143	-0.800359	-0.0570671	0.702906
PRE7g7-SPC24-TRg-1	0.0376678	0.437119	0.0455235	0.526961
PRE7g7-ILS1-NRg-1	0.0441167	0.519661	0.0479382	0.403829
PRE7g7-GFA1-TRg-2	0.0185126	0.191942	0.02637	0.797218
PRE7g7-SEC21-NRg-10	0.0146573	0.142597	0.0231895	0.505523
PRE7g7-RPC10-NRg-1	-0.0519615	-0.710086	-0.041892	0.724963
PRE7g7-RPB10-TRg-3	-0.112267	-1.48196	-0.103184	0.496664
PRE7g7-RPB10-TRg-2	0.000712567	-0.0358875	0.00625772	0.992873
PRE7g7-YNL181W-TRg-1	-0.119635	-1.57628	-0.114526	0.290154
PRE7g7-RAD3-NRg-1	0.0328761	0.375788	0.0325889	0.762194
PRE7g7-NOP10-TRg-1	0.0886671	1.08988	0.0950602	0.447889
PRE7g7-BFR2-TRg-3	-0.0115879	-0.193326	-0.00687362	0.676992
PRE7g7-MCM2-TRg-6	-0.0689251	-0.927211	-0.0697562	0.638938
PRE7g7-MCM2-TRg-4	0.0676875	0.821354	0.0682972	0.605485
PRE7g7-MPP10-TRg-1	-0.0572801	-0.778161	-0.0496277	0.765194
PRE7g7-RET2-TRg-4	0.108432	1.34286	0.118046	0.287752
PRE7g7-RET2-TRg-1	NA	NA	NA	NA
PRE7g7-RPS2-NRg-1	-0.0999047	-1.32373	-0.0912782	0.442689
PRE7g7-RPS2-NRg-2	NA	NA	NA	NA
PRE7g7-ORC4-NRg-3	-0.0142653	-0.227596	-0.0128313	0.813352
PRE7g7-TIP20-TRg-7	-0.101679	-1.34645	-0.0998663	0.259342
PRE7g7-SMT3-TRg-1	-0.016749	-0.259385	-0.011026	0.620399
PRE7g7-MSS18-NRg-6	0.0503404	0.599321	0.0507804	0.304949
PRE7g7-YEF3-NRg-9	-0.0541785	-0.738462	-0.038384	0.761351
PRE7g7-ASK1-NRg-1	-0.00559999	-0.116685	-0.00310283	0.913057
PRE7g7-SMC1-TRg-1	NA	NA	NA	NA
PRE7g7-NIP1-NRg-1	-0.0268772	-0.389021	-0.0243522	0.795817
PRE7g7-RPP1-NRg-1	0.00890376	0.0689552	0.0141978	0.951614
PRE7g7-YDJ1-TRg-6	NA	NA	NA	NA
PRE7g7-SUB2-NRg-1	-0.00819128	-0.149852	-0.00570256	0.779192
PRE7g7-TIM10-NRg-8	0.0265349	0.294624	0.0288	0.68635
PRE7g7-TIM10-NRg-4	0.0187638	0.195158	0.0210015	0.588732
PRE7g7-TIM10-NRg-7	-0.00335157	-0.0879062	-0.00106845	0.965023
PRE7g7-SKI6-TRg-4	0.00264714	-0.0111261	0.00592795	0.998952
PRE7g7-TUB4-TRg-1	-0.116875	-1.54094	-0.114481	0.549446
PRE7g7-CDC37-NRg-2	0.0043018	0.0100527	0.0104266	0.961639
PRE7g7-ISD11-TRg-3	NA	NA	NA	NA
PRE7g7-YOS1-TRg-4	0.0565258	0.678491	0.0588306	0.482823
PRE7g7-SSC1-TRg-6	-0.132104	-1.73586	-0.12512	0.130182
PRE7g7-MTR3-TRg-5	0.0066691	0.0403528	0.0108408	0.977783
PRE7g7-MTR3-TRg-6	-0.0116234	-0.193782	-0.0120331	0.900034
PRE7g7-TFA1-TRg-2	-0.0345567	-0.487314	-0.0280495	0.606696
PRE7g7-CDC3-NRg-3	-0.180417	-2.35425	-0.178091	0.342786
PRE7g7-ERG25-TA-18	NA	NA	NA	NA
PRE7g7-RPB11-TRg-4	0.0827552	1.01421	0.0848684	0.395242
PRE7g7-RPB11-TRg-1	-0.0612825	-0.829389	-0.0463888	0.6859
PRE7g7-RPB11-TRg-2	0.0398521	0.465077	0.0496752	0.68484
PRE7g7-DED1-TRg-3	-0.0334843	-0.473588	-0.0303111	0.665195
PRE7g7-DED1-TRg-1	0.0809793	0.991481	0.0809753	0.372517
PRE7g7-DED1-TRg-6	-0.00187241	-0.0689738	0.00303382	0.986167
PRE7g7-DED1-TRg-4	-0.00778956	-0.14471	-0.00448767	0.434378
PRE7g7-RPL10-NRg-5	-0.0617878	-0.835857	-0.0590867	0.375972
PRE7g7-RPL10-NRg-4	0.0105302	0.0897731	0.0124721	0.945366
PRE7g7-EFB1-NRg-1	0.0524586	0.626433	0.0577099	0.425656
PRE7g7-EFB1-NRg-5	0.0753954	0.920011	0.0796508	0.678251
PRE7g7-EFB1-NRg-4	0.0595431	0.71711	0.0670743	0.387138
PRE7g7-RPT3-NRg-1	NA	NA	NA	NA
PRE7g7-SAC6-TRg-8	NA	NA	NA	NA
PRE7g7-SAC6-TRg-4	NA	NA	NA	NA
PRE7g7-SAC6-TRg-5	-0.207275	-2.69802	-0.20485	0.191861
PRE7g7-SAC6-TRg-3	-0.154966	-2.02849	-0.155014	0.179634
PRE7g7-DIM1-TRg-5	-0.143316	-1.87937	-0.138971	0.407269
PRE7g7-DIM1-TRg-7	-0.0344461	-0.485899	-0.0328724	0.721603
PRE7g7-RPC17-NRg-1	0.072238	0.879598	0.0773842	0.273807
PRE7g7-RPC17-NRg-2	0.140699	1.75587	0.148671	0.264889
PRE7g7-YDR341C-TRg-1	-0.0059407	-0.121046	0.004535	0.98969
PRE7g7-RAP1-NRg-8	-0.0343029	-0.484066	-0.0378761	0.469478
PRE7g7-RAP1-NRg-5	NA	NA	NA	NA
PRE7g7-RAP1-NRg-2	-0.0976295	-1.29461	-0.0954572	0.540114
PRE7g7-SEC26-NRg-3	0.0326175	0.372478	0.0349113	0.601259
PRE7g7-SPP41-TRg-3	-0.115994	-1.52967	-0.105552	0.498035
PRE7g7-TAP42-NRg-1	0.0409714	0.479403	0.0456914	0.283733
PRE7g7-PGA2-TRg-6	0.0703886	0.855927	0.0736912	0.577735
PRE7g7-BRL1-TRg-1	NA	NA	NA	NA
PRE7g7-FOL2-TRg-1	0.0261602	0.289828	0.0259005	0.70658
PRE7g7-NAB3-NRg-5	0.0560911	0.672927	0.0561366	0.533871
PRE7g7-SNF4-TRg-4	0.127308	1.58447	0.134136	0.225312
PRE7g7-HRR25-TRg-2	NA	NA	NA	NA
PRE7g7-TRS23-TRg-4	0.090716	1.11611	0.102797	0.299842
PRE7g7-CTR86-TRg-4	-0.00587703	-0.120231	-0.00241266	0.91793
PRE7g7-RPB5-TRg-5	NA	NA	NA	NA
PRE7g7-SPN1-NRg-2	NA	NA	NA	NA
PRE7g7-SPN1-NRg-1	-0.0237795	-0.349372	-0.0114415	0.866105
PRE7g7-SEC61-NRg-1	-0.083546	-1.11435	-0.0781569	0.383895
PRE7g7-SEC61-NRg-7	-0.0553347	-0.753261	-0.0529294	0.318589
PRE7g7-TUS1-TRg-3	0.0264141	0.293077	0.0284203	0.348442
PRE7g7-OLE1-NRg-2	NA	NA	NA	NA
PRE7g7-AFG2-TRg-1	0.0557573	0.668655	0.0645575	0.346975
PRE7g7-TOA2-NRg-1	0.0292312	0.329136	0.040477	0.731742
PRE7g7-USO1-TRg-1	0.000888563	-0.0336349	0.0141998	0.880315
PRE7g7-UTP22-NRg-2	-0.0475558	-0.653696	-0.0422202	0.735531
PRE7g7-RIB1-TRg-3	-0.0393245	-0.54834	-0.0317895	0.728072
PRE7g7-RIB1-TRg-7	-0.0663525	-0.894282	-0.0569838	0.563686
PRE7g7-RIB1-TRg-4	-0.0322619	-0.457942	-0.0233656	0.623961
PRE7g7-COG1-TRg-1	-0.018244	-0.278522	-0.00762583	0.740346
PRE7g7-RPL32-NRg-2	-0.108115	-1.42882	-0.102464	0.286244
PRE7g7-GLC7-NRg-3	-0.0824566	-1.10041	-0.0810164	0.476272
PRE7g7-GLC7-NRg-4	0.0928213	1.14305	0.0976962	0.44698
PRE7g7-HSF1-TRg-2	0.0703156	0.854992	0.0754639	0.441321
PRE7g7-DAM1-NRg-5	-0.112673	-1.48716	-0.110084	0.363739
PRE7g7-SEC18-TRg-4	0.090203	1.10954	0.097569	0.393883
PRE7g7-SEC18-TRg-5	0.125556	1.56204	0.132336	0.264642
PRE7g7-PAB1-NRg-3	0.102665	1.26904	0.109046	0.305774
PRE7g7-POP8-TRg-2	-0.0374983	-0.524965	-0.0340371	0.526095
PRE7g7-PAB1-NRg-4	0.085417	1.04828	0.0926809	0.515202
PRE7g7-BIG1-TRg-4	NA	NA	NA	NA
PRE7g7-BIG1-TRg-5	-0.082614	-1.10242	-0.0737079	0.520962
PRE7g7-BIG1-TRg-6	-0.129656	-1.70453	-0.123746	0.48073
PRE7g7-RPO41-NRg-1	0.075518	0.921581	0.0790873	0.285929
PRE7g7-RVB2-NRg-2	-0.130564	-1.71615	-0.129333	0.527701
PRE7g7-PET117-NRg-8	0.0860228	1.05604	0.0954251	0.297306
PRE7g7-VPS45-NRg-9	0.161873	2.02688	0.16436	0.325652
PRE7g7-YCG1-NRg-1	NA	NA	NA	NA
PRE7g7-NOC4-NRg-1	0.00925189	0.0734111	0.0120877	0.941082
PRE7g7-NMD3-NRg-2	0.0661119	0.801188	0.0665505	0.386405
PRE7g7-DRS1-TRg-2	0.051095	0.60898	0.0550658	0.424491
PRE7g7-HTB1-NRg-2	-0.0527977	-0.720789	-0.049829	0.258718
PRE7g7-IPI1-TRg-2	0.0187482	0.194958	0.0281187	0.881088
PRE7g7-SEC18-NRg-1	NA	NA	NA	NA
PRE7g7-SEC18-NRg-2	NA	NA	NA	NA
PRE7g7-JIP5-NRg-2	0.0564484	0.6775	0.0560326	0.658598
PRE7g7-YPT1-TRg-3	-0.063585	-0.858861	-0.051118	0.782169
PRE7g7-YPT1-TRg-2	-0.0139146	-0.223107	0.00224906	0.967514
PRE7g7-CLF1-NRg-2	-0.0636188	-0.859294	-0.0570286	0.155692
PRE7g7-SNF2-NRg-7	0.0615839	0.743231	0.0616339	0.638554
PRE7g7-SNF2-NRg-4	-0.0817405	-1.09124	-0.0860164	0.369838
PRE7g7-RPL25-NRg-1	NA	NA	NA	NA
PRE7g7-NOP56-TRg-1	0.0195119	0.204733	0.0187341	0.841025
PRE7g7-NOP56-TRg-2	0.0923122	1.13654	0.0932523	0.589463
PRE7g7-TRS31-TRg-1	NA	NA	NA	NA
PRE7g7-DBF4-TRg-2	NA	NA	NA	NA
PRE7g7-DBF4-TRg-1	-0.105573	-1.39628	-0.0985745	0.423987
PRE7g7-RPC19-TRg-4	0.0821306	1.00622	0.087889	0.545725
PRE7g7-RPC19-TRg-6	-0.0300774	-0.429983	-0.0229809	0.833958
PRE7g7-RPC19-TRg-3	-0.0581597	-0.78942	-0.049854	0.675202
PRE7g7-ROK1-NRg-1	-0.0466549	-0.642164	-0.042258	0.776604
PRE7g7-CDC33-TRg-4	-0.0626287	-0.84662	-0.0626565	0.690019
PRE7g7-DHR2-TRg-3	-0.0353366	-0.497297	-0.0310433	0.803013
PRE7g7-RRP42-NRg-5	-0.0591699	-0.80235	-0.0579777	0.256923
PRE7g7-CLF1-TRg-1	-0.0286683	-0.411946	-0.0195396	0.875834
PRE7g7-ERG11-NA-16	NA	NA	NA	NA
PRE7g7-VAS1-NRg-4	0.0354027	0.408127	0.0463335	0.508953
PRE7g7-PIK1-NRg-2	-0.0611495	-0.827687	-0.0564939	0.466971
PRE7g7-SAR1-NRg-7	-0.189447	-2.46983	-0.184809	0.193001
PRE7g7-SAR1-NRg-4	NA	NA	NA	NA
PRE7g7-RPS3-TRg-1	-0.114642	-1.51237	-0.105669	0.376944
PRE7g7-YTM1-TRg-2	0.0736456	0.897615	0.0786279	0.357717
PRE7g7-SUI3-NRg-5	-0.010107	-0.174372	-0.00795522	0.854746
PRE7g7-SUI3-NRg-2	-0.0675837	-0.910041	-0.0681529	0.348423
PRE7g7-RRP7-TRg-4	0.0637434	0.770872	0.0651297	0.505682
PRE7g7-RRP7-TRg-6	-0.0235176	-0.34602	-0.01537	0.714691
PRE7g7-NIP7-TRg-2	NA	NA	NA	NA
PRE7g7-MDM35-TRg-1	-0.0483438	-0.663782	-0.0454477	0.582246
PRE7g7-ALA1-NRg-1	0.0363282	0.419972	0.0388156	0.581072
PRE7g7-DOA4-NRg-2	-0.141381	-1.85461	-0.139237	0.374836
PRE7g7-RPS13-NRg-1	NA	NA	NA	NA
PRE7g7-YSF3-TRg-2	0.0736137	0.897206	0.0756975	0.536052
PRE7g7-RPS2-NRg-11	NA	NA	NA	NA
PRE7g7-SSL1-TRg-10	0.0159943	0.15971	0.0212661	0.684052
PRE7g7-NIP7-TRg-1	0.0890985	1.0954	0.0917007	0.272988
PRE7g7-LST8-NRg-1	NA	NA	NA	NA
PRE7g7-TAF4-TRg-3	NA	NA	NA	NA
PRE7g7-HAS1-TRg-2	NA	NA	NA	NA
PRE7g7-GLC7-TRg-2	NA	NA	NA	NA
PRE7g7-CDC45-NRg-1	-0.0977365	-1.29598	-0.0891776	0.32381
PRE7g7-SEC22-NRg-8	NA	NA	NA	NA
PRE7g7-YOS1-TRg-2	NA	NA	NA	NA
PRE7g7-RBA50-TRg-3	-0.0140561	-0.224918	-0.0141471	0.738495
PRE7g7-SPP41-NRg-2	-0.0280753	-0.404356	-0.0219907	0.885219
PRE7g7-PRP46-TRg-2	0.0682915	0.829086	0.0700393	0.481812
PRE7g7-PGA2-NRg-1	0.0116772	0.104454	0.0147049	0.823646
PRE7g7-CBF5-TRg-3	0.128306	1.59723	0.12991	0.284429
PRE7g7-TCP1-NRg-3	0.0723414	0.880921	0.0776149	0.22736
PRE7g7-TCP1-NRg-2	0.110937	1.37492	0.120587	0.360824
PRE7g7-ERG26-NRg-2	NA	NA	NA	NA
PRE7g7-ERG26-NRg-4	-0.137231	-1.80149	-0.130493	0.363502
PRE7g7-MES1-TRg-5	-0.00981339	-0.170614	-0.00780488	0.862766
PRE7g7-HTS1-TRg-2	0.047509	0.563081	0.0519611	0.668927
PRE7g7-SSS1-TRg-3	-0.121061	-1.59452	-0.112637	0.54289
PRE7g7-SSS1-TRg-2	-0.205089	-2.67004	-0.194791	0.261861
PRE7g7-SYS1-TRg-7	0.0333865	0.382321	0.0385538	0.641983
PRE7g7-SYS1-TRg-2	0.0184366	0.19097	0.0284579	0.768851
PRE7g7-SYS1-TRg-1	-0.0238387	-0.35013	-0.0138056	0.830958
PRE7g7-BFR2-TRg-1	-0.0507603	-0.694712	-0.0465812	0.625321
PRE7g7-EOS1-TRg-3	-0.168411	-2.20058	-0.163537	0.171403
PRE7g7-TAF4-NRg-1	-0.0917705	-1.21962	-0.0786847	0.336558
PRE7g7-ARL3-NRg-8	0.0730252	0.889674	0.0798375	0.354051
PRE7g7-RPN5-NRg-1	0.0698528	0.849069	0.0740978	0.217399
PRE7g7-TIM9-NRg-2	0.0841172	1.03165	0.0873268	0.315771
PRE7g7-NUP57-NRg-3	0.0620357	0.749015	0.0709867	0.634346
PRE7g7-VPS4-TRg-1	-0.146017	-1.91395	-0.139393	0.272251
PRE7g7-CDC3-TRg-4	NA	NA	NA	NA
PRE7g7-BBP1-NRg-1	-0.0889275	-1.18323	-0.0853965	0.612493
PRE7g7-BBP1-NRg-2	NA	NA	NA	NA
PRE7g7-USE1-NRg-3	-0.0555518	-0.75604	-0.0489973	0.701372
PRE7g7-CCT7-TRg-1	0.0900896	1.10809	0.0899604	0.442689
PRE7g7-SAH1-TRg-3	-0.00856668	-0.154657	-0.00567569	0.902876
PRE7g7-CHS2-TRg-1	-0.023947	-0.351516	-0.0223346	0.664024
PRE7g7-DPM1-TRg-2	-0.0396642	-0.552688	-0.0389697	0.60554
PRE7g7-BBP1-TRg-1	NA	NA	NA	NA
PRE7g7-NRD1-TRg-4	0.0947721	1.16802	0.100673	0.273807
PRE7g7-RPB3-NRg-1	0.00425477	0.00945068	0.0166961	0.93368
PRE7g7-PHO85-NRg-6	0.0585657	0.704601	0.0637116	0.234617
PRE7g7-SNF6-TRg-6	NA	NA	NA	NA
PRE7g7-PRP38-NRg-2	0.0858306	1.05358	0.0927628	0.489094
PRE7g7-OAR1-NRg-3	0.0142233	0.137042	0.0164109	0.856298
PRE7g7-ROX3-NRg-1	0.02156	0.230948	0.0216932	0.783455
PRE7g7-YPP1-TRg-6	NA	NA	NA	NA
PRE7g7-CBF2-NRg-8	0.0627915	0.758689	0.0621169	0.385296
PRE7g7-SPT6-TRg-5	NA	NA	NA	NA
PRE7g7-SEC10-NRg-1	NA	NA	NA	NA
PRE7g7-NSL1-NRg-3	-0.0794976	-1.06253	-0.0632117	0.468858
PRE7g7-NRD1-NRg-8	0.195767	2.4607	0.200353	0.230197
PRE7g7-RPB3-TRg-1	0.0127147	0.117733	0.0218714	0.93802
PRE7g7-NRD1-NRg-4	0.113416	1.40665	0.118458	0.245233
PRE7g7-RVB1-TRg-2	NA	NA	NA	NA
PRE7g7-TIF5-NRg-8	NA	NA	NA	NA
PRE7g7-EOS1-NRg-1	NA	NA	NA	NA
PRE7g7-ERG25-NA-26	0.0169047	0.171362	0.0186188	0.909902
PRE7g7-MSL5-NRg-4	0.03319	0.379805	0.0319798	0.393185
PRE7g7-SEC24-TRg-2	NA	NA	NA	NA
PRE7g7-RPL30-NRg-5	NA	NA	NA	NA
PRE7g7-SNU71-NRg-3	0.0396289	0.46222	0.0410921	0.392639
PRE7g7-CDC33-NRg-1	-0.150892	-1.97634	-0.146322	0.441063
PRE7g7-RPN6-TRg-4	0.0494931	0.588477	0.0542026	0.277871
PRE7g7-NAB2-TRg-4	-0.00123581	-0.0608256	0.00711907	0.978047
PRE7g7-NAB2-TRg-6	0.136334	1.69999	0.139805	0.319337
PRE7g7-YTM1-NRg-1	NA	NA	NA	NA
PRE7g7-OLE1-TRg-8	NA	NA	NA	NA
PRE7g7-OLE1-TRg-1	-0.190174	-2.47913	-0.187782	0.303461
PRE7g7-UTP7-TRg-4	-0.026039	-0.378293	-0.0219349	0.76199
PRE7g7-ACT1-NRg-6	NA	NA	NA	NA
PRE7g7-RPL18A-NRg-3	-0.133293	-1.75108	-0.125513	0.193001
PRE7g7-BRX1-NRg-1	-0.0090871	-0.161318	-0.00400852	0.894997
PRE7g7-NAF1-TRg-8	0.1253	1.55876	0.129187	0.232024
PRE7g7-NAF1-TRg-6	-0.0128731	-0.209777	-0.00810759	0.909458
PRE7g7-NAF1-TRg-4	0.105737	1.30837	0.110223	0.270307
PRE7g7-CDC8-TRg-2	0.0899813	1.1067	0.0937984	0.693284
PRE7g7-NSE4-TRg-1	-0.0336408	-0.475591	-0.0259676	0.563106
PRE7g7-PAB1-NRg-2	0.0925544	1.13964	0.102441	0.145957
PRE7g7-PRP43-TRg-4	NA	NA	NA	NA
PRE7g7-SEC2-NRg-3	-0.0567374	-0.771215	-0.0527562	0.638399
PRE7g7-SEC2-NRg-6	-0.0582914	-0.791106	-0.0560554	0.392939
PRE7g7-MPP10-NRg-5	0.00603201	0.0321983	0.00948559	0.977488
PRE7g7-YDR355C-TRg-2	-0.0260663	-0.378642	-0.0171533	0.834252
PRE7g7-YLR339C-TRg-9	NA	NA	NA	NA
PRE7g7-SNM1-TRg-2	0.015128	0.148622	0.0219422	0.38402
PRE7g7-ALR1-NRg-4	-0.0763317	-1.02201	-0.0690488	0.554052
PRE7g7-ALR1-NRg-1	-0.0158538	-0.247928	-0.00886424	0.822791
PRE7g7-ALR1-NRg-3	-0.00158263	-0.0652648	0.00479777	0.982906
PRE7g7-RPL10-TRg-1	-0.0277922	-0.400733	-0.025075	0.464572
PRE7g7-RPL28-TRg-2	-0.13553	-1.77972	-0.131007	0.298076
PRE7g7-UTP25-TRg-1	-0.0098617	-0.171232	-0.00671303	0.868696
PRE7g7-POB3-TRg-1	0.0176131	0.180431	0.0265015	0.64698
PRE7g7-POB3-TRg-3	NA	NA	NA	NA
PRE7g7-POB3-TRg-2	0.0385211	0.448041	0.044858	0.887076
PRE7g7-MED11-TRg-1	0.00597964	0.0315281	0.0160114	0.914202
PRE7g7-ISA1-TRg-15	NA	NA	NA	NA
PRE7g7-RRP1-NRg-1	-0.0651168	-0.878467	-0.0626933	0.321355
PRE7g7-MES1-NRg-1	0.031375	0.356575	0.0430708	0.79691
PRE7g7-SEC13-NRg-5	NA	NA	NA	NA
PRE7g7-MCM2-NRg-2	0.0445199	0.524822	0.0466224	0.609701
PRE7g7-ALA1-TRg-4	0.0350945	0.404182	0.0451073	0.673062
PRE7g7-MTG2-TRg-5	0.165614	2.07475	0.170637	0.405668
PRE7g7-TIF35-NRg-3	0.0353546	0.407511	0.0377783	0.594017
PRE7g7-NSE1-TRg-3	0.104755	1.29579	0.107199	0.262729
PRE7g7-NSE1-TRg-4	0.0720229	0.876846	0.0754896	0.370826
PRE7g7-MOB2-NRg-6	-0.0182029	-0.277995	-0.00936228	0.891084
PRE7g7-VRG4-NRg-3	NA	NA	NA	NA
PRE7g7-PRP9-TRg-3	NA	NA	NA	NA
PRE7g7-HYM1-TRg-5	NA	NA	NA	NA
PRE7g7-POP1-TRg-5	0.00420967	0.00887345	0.0121515	0.978322
PRE7g7-POP1-TRg-9	0.0541917	0.648616	0.0582426	0.60922
PRE7g7-RPL17A-TRg-1	0.0231936	0.251858	0.0259457	0.697924
PRE7g7-SLD2-TRg-1	0.0115455	0.102768	0.0184023	0.703234
PRE7g7-CDC48-NRg-7	0.0229979	0.249352	0.0274168	0.827899
PRE7g7-FHL1-NRg-2	-0.0719116	-0.965436	-0.0689643	0.198166
PRE7g7-BET3-NRg-7	0.107391	1.32954	0.108713	0.186312
PRE7g7-MAK21-TRg-1	0.106355	1.31627	0.110722	0.419672
PRE7g7-BRN1-TRg-4	NA	NA	NA	NA
PRE7g7-FBA1-NRg-3	-0.101881	-1.34903	-0.103123	0.366241
PRE7g7-CDC42-TRg-6	NA	NA	NA	NA
PRE7g7-CDC42-TRg-7	-0.177592	-2.31808	-0.171027	0.226074
PRE7g7-COG4-NRg-1	-0.0104777	-0.179117	-0.00474369	0.905324
PRE7g7-ATP3-NRg-3	0.13497	1.68254	0.136517	0.328527
PRE7g7-ATP3-NRg-2	0.114371	1.41888	0.116087	0.468858
PRE7g7-SMP3-TRg-5	0.00302025	-0.00635045	0.00192493	0.961611
PRE7g7-CFT2-NRg-2	0.00820242	0.0599784	0.0195232	0.924966
PRE7g7-FAS2-TRg-5	0.0115045	0.102243	0.0196167	0.831488
PRE7g7-DBP2-NRg-3	0.0306641	0.347475	0.0320338	0.825755
PRE7g7-DBP2-NRg-2	0.0190586	0.198932	0.0227519	0.872043
PRE7g7-MPS2-NRg-4	-0.010455	-0.178827	-0.00168193	0.896725
PRE7g7-ARC35-TRg-2	NA	NA	NA	NA
PRE7g7-ARC35-TRg-5	NA	NA	NA	NA
PRE7g7-MRD1-TRg-1	-0.0761073	-1.01914	-0.0702175	0.671288
PRE7g7-RLP7-TRg-1	0.0134273	0.126853	0.0174612	0.748156
PRE7g7-SPC34-TRg-1	NA	NA	NA	NA
PRE7g7-CDC45-TRg-2	-0.00157673	-0.0651893	0.00150052	0.966184
PRE7g7-GCD6-TRg-3	-0.0205611	-0.308179	-0.013744	0.873732
PRE7g7-GCD6-TRg-4	NA	NA	NA	NA
PRE7g7-YPT6-NRg-2	0.0430127	0.505531	0.0573696	0.572317
PRE7g7-RPS13-TRg-2	NA	NA	NA	NA
PRE7g7-IPI3-TRg-3	0.0875333	1.07537	0.0888639	0.259239
PRE7g7-TIF5-NRg-9	NA	NA	NA	NA
PRE7g7-TIF5-NRg-7	-0.0508919	-0.696396	-0.0463593	0.599397
PRE7g7-TIF5-NRg-6	-0.0508397	-0.695728	-0.04068	0.714139
PRE7g7-NAB3-TRg-3	0.0387143	0.450513	0.0533537	0.657419
PRE7g7-GCD2-TRg-1	-0.0661238	-0.891356	-0.0567139	0.611364
PRE7g7-UBA1-TRg-2	0.0450606	0.531742	0.0565254	0.65285
PRE7g7-SLD3-TRg-6	NA	NA	NA	NA
PRE7g7-LCB1-TRg-5	-0.0396609	-0.552646	-0.0367611	0.391283
PRE7g7-TOA2-TRg-6	NA	NA	NA	NA
PRE7g7-TOA2-TRg-1	-0.0623617	-0.843203	-0.0562863	0.466651
PRE7g7-TOA2-TRg-3	NA	NA	NA	NA
PRE7g7-LSM2-TRg-1	-0.0222201	-0.329413	-0.0179043	0.366963
PRE7g7-YML6-TRg-13	0.0238595	0.260381	0.0233611	0.898171
PRE7g7-YML6-TRg-12	-0.0639498	-0.863529	-0.063853	0.407858
PRE7g7-UTP15-NRg-1	NA	NA	NA	NA
PRE7g7-TIF6-NRg-8	0.0710505	0.864399	0.0738703	0.471986
PRE7g7-SUP35-NRg-1	-0.0530792	-0.724393	-0.0435157	0.821518
PRE7g7-MPP10-NRg-1	-0.0932495	-1.23855	-0.0893888	0.656184
PRE7g7-SWI3-TRg-7	-0.0711588	-0.955801	-0.0696005	0.483537
PRE7g7-SSN3-NRg-2	-0.00540227	-0.114154	-0.00413422	0.485959
PRE7g7-SEC13-NRg-7	NA	NA	NA	NA
PRE7g7-RPS15-NRg-3	NA	NA	NA	NA
PRE7g7-RPL3-TRg-2	-0.0522304	-0.713529	-0.0484113	0.305774
PRE7g7-FBA1-NRg-2	-0.0457479	-0.630555	-0.047307	0.563555
PRE7g7-FBA1-NRg-1	-0.0712758	-0.957298	-0.0729081	0.430207
PRE7g7-FBA1-NRg-5	-0.0178022	-0.272866	-0.0193519	0.777883
PRE7g7-DAM1-TRg-2	NA	NA	NA	NA
PRE7g7-NHP2-TRg-2	0.060976	0.735451	0.06415	0.288116
PRE7g7-HCA4-NRg-6	-0.00616821	-0.123958	-0.00254543	0.887397
PRE7g7-PRE3-TRg-4	NA	NA	NA	NA
PRE7g7-DBP5-NRg-4	0.0476091	0.564362	0.0562153	0.709462
PRE7g7-SPT6-NRg-4	-0.161128	-2.10736	-0.158731	0.305774
PRE7g7-SPT6-NRg-2	-0.180982	-2.36148	-0.179874	0.31715
PRE7g7-RPL18A-TRg-4	-0.0271074	-0.391968	-0.0218816	0.843471
PRE7g7-KSH1-TRg-1	NA	NA	NA	NA
PRE7g7-KSH1-TRg-3	0.0425175	0.499192	0.0441425	0.290391
PRE7g7-IPI3-NRg-1	0.0630362	0.76182	0.0702888	0.654726
PRE7g7-PGA2-TRg-8	0.138186	1.7237	0.138407	0.297356
PRE7g7-RPL18A-TRg-2	NA	NA	NA	NA
PRE7g7-RPL33A-NRg-6	NA	NA	NA	NA
PRE7g7-TAF12-NRg-2	0.0487192	0.578571	0.0519976	0.693609
PRE7g7-USE1-TRg-5	-0.0385915	-0.538958	-0.04065	0.56103
PRE7g7-YNL114C-TRg-1	0.0958282	1.18154	0.0996397	0.334144
PRE7g7-SMC5-TRg-7	-0.0374626	-0.524508	-0.0345661	0.613823
PRE7g7-SMC5-TRg-6	0.101689	1.25655	0.103619	0.322117
PRE7g7-RSC58-TRg-1	0.211026	2.65601	0.213329	0.134952
PRE7g7-CTF13-TRg-2	NA	NA	NA	NA
PRE7g7-NAB2-NRg-2	0.0690611	0.838936	0.0780987	0.537031
PRE7g7-MCM7-TRg-4	-0.138023	-1.81162	-0.130831	0.272267
PRE7g7-BCP1-NRg-5	-0.0246132	-0.360043	-0.0144227	0.854182
PRE7g7-STU2-TRg-3	NA	NA	NA	NA
PRE7g7-SEC21-NRg-6	0.0257453	0.284518	0.0351779	0.581201
PRE7g7-SEC21-NRg-3	0.0572838	0.688193	0.0683716	0.549469
PRE7g7-RPL1B-TRg-3	-0.12916	-1.69819	-0.125472	0.294635
PRE7g7-SEC20-NRg-2	-0.0688042	-0.925663	-0.0667884	0.35634
PRE7g7-VMA3-NRg-2	-0.0325767	-0.461972	-0.0300205	0.529808
PRE7g7-SEC23-NRg-5	-0.154725	-2.02541	-0.15423	0.30645
PRE7g7-CDC28-TRg-4	-0.0790924	-1.05735	-0.0758562	0.55584
PRE7g7-RPN12-NRg-11	0.0958725	1.18211	0.0988373	0.452253
PRE7g7-PUP3-TRg-3	0.125742	1.56442	0.138256	0.529486
PRE7g7-SEC31-TRg-2	-0.089897	-1.19564	-0.0816689	0.256199
PRE7g7-SED5-TRg-6	0.022403	0.241738	0.0280416	0.863985
PRE7g7-SED5-TRg-5	-0.00220168	-0.0731883	0.000155632	0.847022
PRE7g7-RPL33A-TRg-1	-0.0290514	-0.41685	-0.0260553	0.787136
PRE7g7-RPL33A-TRg-2	-0.0231655	-0.341514	-0.0202527	0.684047
PRE7g7-MRPL11-TRg-2	0.124881	1.5534	0.126691	0.27261
PRE7g7-RTP1-NRg-2	0.0214258	0.22923	0.0282519	0.701029
PRE7g7-NUG1-TRg-2	-0.00412134	-0.0977589	0.00198709	0.971448
PRE7g7-VPH2-TRg-4	-0.0750063	-1.00505	-0.0722241	0.458377
PRE7g7-COP1-NRg-3	0.0617398	0.745228	0.0737458	0.381006
PRE7g7-CRM1-NRg-1	-0.0826439	-1.1028	-0.0726639	0.664005
PRE7g7-RPL5-NRg-4	NA	NA	NA	NA
PRE7g7-SNU13-NRg-4	NA	NA	NA	NA
PRE7g7-PFS2-TRg-3	NA	NA	NA	NA
PRE7g7-MPP10-TRg-2	-0.0590718	-0.801094	-0.0545805	0.244391
PRE7g7-TSR4-NRg-2	0.0047993	0.0164204	0.00864838	0.984699
PRE7g7-RSC2-TRg-1	0.215884	2.71819	0.21625	0.249267
PRE7g7-SEC65-TRg-2	0.00290254	-0.00785714	0.0102292	0.948389
PRE7g7-SMI1-NRg-1	0.0590682	0.711032	0.0616921	0.455295
PRE7g7-RTT105-NRg-4	0.00896282	0.0697111	0.00963331	0.938584
PRE7g7-VMA5-TRg-3	-0.100797	-1.33516	-0.0971216	0.683151
PRE7g7-VMA5-TRg-5	0.0510112	0.607907	0.0497453	0.480531
PRE7g7-RRP1-TRg-3	0.0120726	0.109515	0.0161297	0.938567
PRE7g7-CLC1-TRg-2	-0.0268691	-0.388917	-0.017889	0.319772
PRE7g7-GCD6-NRg-1	0.0245753	0.269542	0.0335844	0.514064
PRE7g7-GCD6-NRg-2	0.0157027	0.155978	0.0210291	0.884185
PRE7g7-PXR1-TRg-1	0.0785151	0.959942	0.0823867	0.380758
PRE7g7-CDC14-NRg-1	NA	NA	NA	NA
PRE7g7-PCF11-TRg-6	NA	NA	NA	NA
PRE7g7-PCF11-TRg-5	NA	NA	NA	NA
PRE7g7-PCF11-TRg-4	NA	NA	NA	NA
PRE7g7-SEC31-NRg-1	NA	NA	NA	NA
PRE7g7-RRP5-NRg-1	0.0754198	0.920324	0.0814715	0.34287
PRE7g7-PRE10-TRg-5	NA	NA	NA	NA
PRE7g7-PRE10-TRg-1	-0.0492683	-0.675615	-0.0389592	0.478134
PRE7g7-RPS5-TRg-2	NA	NA	NA	NA
PRE7g7-NSP1-TRg-4	0.021326	0.227954	0.029107	0.832287
PRE7g7-PRP38-TRg-4	0.0711183	0.865267	0.0738128	0.413809
PRE7g7-RCF1-NRg-5	-0.0509181	-0.696731	-0.0464629	0.381912
PRE7g7-RSC3-TRg-4	0.0555197	0.665614	0.0565132	0.591834
PRE7g7-RSC3-TRg-5	0.0817083	1.00081	0.0847939	0.491173
PRE7g7-RSC3-TRg-6	0.0495048	0.588626	0.0517431	0.371469
PRE7g7-HTA1-NRg-12	-0.236529	-3.07244	-0.235295	0.303149
PRE7g7-HTA1-NRg-11	-0.0987017	-1.30834	-0.0982109	0.344669
PRE7g7-UTP23-TRg-2	-0.0172653	-0.265994	-0.0140036	0.784257
PRE7g7-GCD7-NRg-1	NA	NA	NA	NA
PRE7g7-GCD7-NRg-2	-0.0162125	-0.252519	-0.0133312	0.839571
PRE7g7-GCD7-NRg-6	0.00344972	-0.000853445	0.00647038	0.997022
PRE7g7-GAL11-NRg-2	-0.136514	-1.79231	-0.132485	0.406137
PRE7g7-GAL11-NRg-9	-0.191325	-2.49386	-0.184929	0.33996
PRE7g7-PHO4-TRg-5	-0.0398369	-0.554898	-0.0339881	0.520486
PRE7g7-SNP1-NRg-3	0.155011	1.93905	0.157813	0.271535
PRE7g7-RPC37-TRg-5	0.0582491	0.700549	0.0643249	0.546052
PRE7g7-CRM1-TRg-5	-0.109864	-1.4512	-0.103939	0.495496
PRE7g7-CRM1-TRg-2	-0.0769006	-1.02929	-0.0729837	0.38989
PRE7g7-ASK1-TRg-7	NA	NA	NA	NA
PRE7g7-STU2-NRg-4	-0.0722448	-0.969701	-0.0612852	0.688876
PRE7g7-NEO1-NRg-3	NA	NA	NA	NA
PRE7g7-GAL11-TRg-5	-0.0755848	-1.01245	-0.0704975	0.343375
PRE7g7-GAL11-TRg-7	-0.0319695	-0.4542	-0.0291495	0.796157
PRE7g7-SAM50-NRg-3	0.00683173	0.0424344	0.00739695	0.978468
PRE7g7-CSL4-TRg-2	0.0149492	0.146333	0.0177359	0.887326
PRE7g7-CCT5-TRg-2	0.0568073	0.682094	0.0603374	0.677479
PRE7g7-POL30-NRg-1	-0.0108603	-0.184014	-0.00972012	0.615247
PRE7g7-MED4-TRg-4	-0.02646	-0.383681	-0.0198078	0.739741
PRE7g7-MED4-TRg-3	-0.0541174	-0.73768	-0.0480289	0.689139
PRE7g7-MED4-TRg-2	-0.0196738	-0.296821	-0.0158338	0.752689
PRE7g7-GDI1-TRg-4	NA	NA	NA	NA
PRE7g7-GDI1-TRg-3	0.0814883	0.997997	0.0858557	0.557309
PRE7g7-REB1-TRg-6	NA	NA	NA	NA
PRE7g7-MRPL37-NRg-2	0.0696063	0.845914	0.0688738	0.268139
PRE7g7-NOC3-TRg-3	-0.0181689	-0.27756	-0.0140187	0.793098
PRE7g7-SPC97-TRg-3	NA	NA	NA	NA
PRE7g7-IPP1-TRg-3	0.0540413	0.646691	0.0612826	0.497357
PRE7g7-IPP1-TRg-2	0.0833902	1.02234	0.0949491	0.381104
PRE7g7-PTI1-TRg-3	NA	NA	NA	NA
PRE7g7-PTI1-TRg-5	0.03893	0.453275	0.0498947	0.524374
PRE7g7-RFC5-NRg-1	-0.00854781	-0.154415	-0.0067777	0.76058
PRE7g7-CDC24-TRg-1	0.0185173	0.192003	0.0240135	0.922799
PRE7g7-CDC24-TRg-3	NA	NA	NA	NA
PRE7g7-CDC24-TRg-5	NA	NA	NA	NA
PRE7g7-CDC24-TRg-6	NA	NA	NA	NA
PRE7g7-UTP23-TRg-6	0.0738931	0.900782	0.0753362	0.446427
PRE7g7-UTP23-TRg-4	-0.032027	-0.454936	-0.0261078	0.707082
PRE7g7-UTP23-TRg-1	0.0460275	0.544118	0.0515739	0.22003
PRE7g7-RHO3-NRg-4	-0.0609419	-0.825031	-0.0612111	0.571792
PRE7g7-TRS23-NRg-1	0.08885	1.09222	0.101026	0.37464
PRE7g7-TRS23-NRg-3	0.173002	2.16932	0.182434	0.260127
PRE7g7-RSP5-TRg-2	-0.0497656	-0.68198	-0.0430175	0.683594
PRE7g7-RSP5-TRg-1	-0.0490665	-0.673032	-0.0436372	0.415622
PRE7g7-SDA1-NRg-1	-0.0469085	-0.64541	-0.0419874	0.299005
PRE7g7-KAP95-TRg-8	NA	NA	NA	NA
PRE7g7-ACO1-TRg-6	NA	NA	NA	NA
PRE7g7-HTA1-NRg-3	-0.0779328	-1.0425	-0.0759897	0.403955
PRE7g7-HTA1-NRg-2	-0.202963	-2.64283	-0.19912	0.149239
PRE7g7-SPN1-TRg-1	0.118665	1.47384	0.126242	0.626981
PRE7g7-MOT1-NRg-7	0.0498887	0.59354	0.0521947	0.485476
PRE7g7-RPL17A-NRg-4	0.00583615	0.0296915	0.0101658	0.942891
PRE7g7-ADA2-TRg-4	0.0475578	0.563705	0.0481328	0.689003
PRE7g7-SFH1-NRg-1	-0.00395272	-0.0956006	-0.00265528	0.819325
PRE7g7-SPC97-NRg-5	NA	NA	NA	NA
PRE7g7-PRP22-TRg-3	NA	NA	NA	NA
PRE7g7-SEN15-TRg-2	-0.0259902	-0.377668	-0.0199794	0.811466
PRE7g7-RPL3-NRg-2	NA	NA	NA	NA
PRE7g7-ISD11-NRg-2	0.13695	1.70788	0.137659	0.266008
PRE7g7-HEM12-TRg-8	0.0808115	0.989334	0.0802284	0.740539
PRE7g7-SEC10-TRg-1	NA	NA	NA	NA
PRE7g7-HTB1-TRg-7	-0.18373	-2.39665	-0.184384	0.259342
PRE7g7-TTI2-TRg-1	-0.104316	-1.38019	-0.101447	0.288287
PRE7g7-ACP1-TRg-2	-0.0216865	-0.322583	-0.0159741	0.757911
PRE7g7-ACP1-TRg-4	0.000915523	-0.0332898	0.00444967	0.986247
PRE7g7-GAL11-NRg-10	NA	NA	NA	NA
PRE7g7-UTP22-TRg-2	-0.00476657	-0.106017	-0.00363641	0.913858
PRE7g7-MST1-NRg-5	0.0661156	0.801234	0.0757892	0.377364
PRE7g7-RIB7-NRg-2	0.0480599	0.570132	0.0482367	0.472728
PRE7g7-MCD1-TRg-6	-0.0454661	-0.626949	-0.0411412	0.347128
PRE7g7-MCD1-TRg-5	-0.133427	-1.7528	-0.128208	0.197323
PRE7g7-GPI8-NRg-2	NA	NA	NA	NA
PRE7g7-THS1-TRg-2	-0.0226344	-0.334715	-0.0200778	0.699147
PRE7g7-RRP7-TRg-2	NA	NA	NA	NA
PRE7g7-RRP7-TRg-5	0.0327601	0.374303	0.0453175	0.574306
PRE7g7-SMX2-NRg-7	0.0112904	0.0995024	0.01114	0.927787
PRE7g7-RRP45-TRg-5	NA	NA	NA	NA
PRE7g7-RRP45-TRg-4	NA	NA	NA	NA
PRE7g7-CNS1-TRg-2	0.124648	1.55042	0.133741	0.34067
PRE7g7-FBP1-NRg-9	-0.178977	-2.33581	-0.177878	0.193074
PRE7g7-GCD11-NRg-1	NA	NA	NA	NA
PRE7g7-RPL10-TRg-2	0.0428105	0.502942	0.0426612	0.778106
PRE7g7-NUP192-TRg-4	-0.0722197	-0.96938	-0.057627	0.479572
PRE7g7-NUP145-NRg-4	0.0222462	0.239731	0.0294767	0.8172
PRE7g7-HEM12-TRg-6	0.124119	1.54364	0.123066	0.28988
PRE7g7-PLC1-TRg-3	NA	NA	NA	NA
PRE7g7-RPA43-TRg-1	0.0332452	0.380512	0.0368325	0.25273
PRE7g7-RPB7-NRg-2	-0.0693701	-0.932906	-0.0637259	0.517295
PRE7g7-RPB7-NRg-3	NA	NA	NA	NA
PRE7g7-NSL1-NRg-1	NA	NA	NA	NA
PRE7g7-UTP6-TRg-3	-0.067171	-0.904759	-0.0602986	0.661635
PRE7g7-UTP6-TRg-1	-0.0792469	-1.05932	-0.070965	0.411727
PRE7g7-YJU2-TRg-5	-0.127539	-1.67744	-0.114812	0.271305
PRE7g7-FRS2-NRg-5	NA	NA	NA	NA
PRE7g7-TIF35-NRg-2	0.0123457	0.11301	0.0209577	0.604607
PRE7g7-GPI15-TRg-1	-0.0467645	-0.643568	-0.0441946	0.413338
PRE7g7-NOP1-NRg-5	-0.0299455	-0.428294	-0.0209203	0.657419
PRE7g7-GPI15-TRg-4	-0.0316926	-0.450656	-0.0294425	0.609951
PRE7g7-COG4-TRg-1	-0.0115901	-0.193355	-0.000487763	0.969097
PRE7g7-TFA1-TRg-1	0.0443084	0.522115	0.0554604	0.651999
PRE7g7-RHO1-NRg-2	NA	NA	NA	NA
PRE7g7-RHO1-NRg-1	-0.189525	-2.47082	-0.184008	0.328527
PRE7g7-CDC55-NRg-2	-0.0330205	-0.467652	-0.0326531	0.707787
PRE7g7-IDI1-NRg-7	-0.0366527	-0.514142	-0.0303899	0.738227
PRE7g7-RPL32-TRg-5	NA	NA	NA	NA
PRE7g7-RPB5-TRg-4	0.140009	1.74704	0.144558	0.336868
PRE7g7-DIP2-TRg-5	0.0291091	0.327572	0.0347477	0.74524
PRE7g7-DIP2-TRg-1	-0.00824548	-0.150546	4.43362e-05	0.904193
PRE7g7-RPC40-TRg-2	0.0687276	0.834667	0.0732616	0.523094
PRE7g7-CDC6-TRg-5	0.00529996	0.0228286	0.00592875	0.998454
PRE7g7-CDC6-TRg-3	-0.0835059	-1.11384	-0.0762634	0.539786
PRE7g7-DAD2-TRg-2	NA	NA	NA	NA
PRE7g7-RVS161-TRg-2	NA	NA	NA	NA
PRE7g7-RVS161-TRg-1	NA	NA	NA	NA
PRE7g7-SUP45-NRg-3	-0.0500025	-0.685012	-0.0420349	0.747391
PRE7g7-SRB6-NRg-5	0.00981765	0.0806525	0.0175047	0.947766
PRE7g7-RPC11-TRg-4	0.105245	1.30207	0.11259	0.381311
PRE7g7-RKI1-TRg-8	0.071762	0.873506	0.07389	0.264889
PRE7g7-NIP7-TRg-3	0.040691	0.475815	0.0471884	0.79396
PRE7g7-RPL33A-NRg-12	-0.0384958	-0.537733	-0.0332875	0.814618
PRE7g7-SAM50-TRg-4	0.0316293	0.359829	0.0320114	0.725296
PRE7g7-NOP4-NRg-1	0.0818696	1.00288	0.0846735	0.354213
PRE7g7-NOP4-NRg-3	0.0827679	1.01437	0.0907264	0.583312
PRE7g7-SMX2-TRg-5	0.084818	1.04062	0.0930623	0.376633
PRE7g7-POL12-NRg-2	-0.120481	-1.58709	-0.110911	0.379035
PRE7g7-BMS1-NRg-2	-0.0346055	-0.487939	-0.0320662	0.632386
PRE7g7-RPA190-TRg-5	0.0170321	0.172993	0.0217408	0.922939
PRE7g7-ALG14-NRg-4	0.0151782	0.149264	0.0199269	0.638955
PRE7g7-ALG14-NRg-1	0.0899166	1.10587	0.0911386	0.718039
PRE7g7-PRE5-NRg-1	0.0253001	0.278819	0.0338481	0.486663
PRE7g7-BIG1-NRg-2	-0.126376	-1.66255	-0.119238	0.294262
PRE7g7-TFA2-TRg-4	NA	NA	NA	NA
PRE7g7-IMP4-TRg-6	-0.0671068	-0.903937	-0.0650168	0.326028
PRE7g7-PAN1-NRg-1	NA	NA	NA	NA
PRE7g7-UTP13-TRg-2	-0.0163072	-0.253731	-0.0087804	0.906854
PRE7g7-KAE1-NRg-3	0.0168228	0.170314	0.016842	0.683506
PRE7g7-ERG20-TRg-1	0.025656	0.283375	0.0302333	0.430339
PRE7g7-CDC20-TRg-6	NA	NA	NA	NA
PRE7g7-PWP2-NRg-2	0.0857455	1.05249	0.0855281	0.444602
PRE7g7-COG1-NRg-1	0.0629736	0.761019	0.0751717	0.343071
PRE7g7-RPL1B-TRg-4	-0.0949686	-1.26055	-0.0897593	0.191051
PRE7g7-RPL1B-TRg-7	-0.091046	-1.21035	-0.0896707	0.503239
PRE7g7-UTP20-TRg-3	0.0383449	0.445786	0.0450915	0.42199
PRE7g7-UTP20-TRg-4	0.0273556	0.305129	0.0329184	0.668347
PRE7g7-RPL25-TRg-4	-0.117851	-1.55343	-0.111886	0.285929
PRE7g7-RPL25-TRg-2	0.00720206	0.0471744	0.0129013	0.970417
PRE7g7-MCM7-NRg-1	-0.0183023	-0.279267	-0.0138489	0.132126
PRE7g7-MRP49-TRg-5	0.00445607	0.0120273	0.0051291	0.992595
PRE7g7-ERO1-NRg-3	0.0795211	0.972818	0.0855259	0.443655
PRE7g7-UTP5-TRg-7	-0.0144004	-0.229325	-0.0117527	0.449272
PRE7g7-MCM4-NRg-1	0.00626336	0.0351596	0.0194999	0.910181
PRE7g7-PRE3-NRg-1	0.0904154	1.11226	0.0931658	0.352716
PRE7g7-FCF1-NRg-1	NA	NA	NA	NA
PRE7g7-CUS1-NRg-1	NA	NA	NA	NA
PRE7g7-PSF1-TRg-2	0.0356343	0.411091	0.0366003	0.637655
PRE7g7-BCP1-TRg-2	0.102804	1.27082	0.107606	0.294033
PRE7g7-PAN1-TRg-1	-0.0409059	-0.56858	-0.0288863	0.813487
PRE7g7-PAN1-TRg-3	NA	NA	NA	NA
PRE7g7-PAN1-TRg-4	0.069848	0.849007	0.0841052	0.499095
PRE7g7-VPS3-TRg-2	0.0248713	0.273331	0.0276415	0.563935
PRE7g7-YIL060W-NRg-1	0.119379	1.48298	0.128099	0.452106
PRE7g7-VPS53-NRg-1	NA	NA	NA	NA
PRE7g7-CYR1-TRg-4	NA	NA	NA	NA
PRE7g7-CYR1-TRg-7	NA	NA	NA	NA
PRE7g7-MPS1-NRg-1	NA	NA	NA	NA
PRE7g7-SRP1-TRg-5	NA	NA	NA	NA
PRE7g7-SRP1-TRg-4	NA	NA	NA	NA
PRE7g7-TAF12-TRg-2	NA	NA	NA	NA
PRE7g7-TAF12-TRg-3	NA	NA	NA	NA
PRE7g7-POP4-TRg-1	0.0656507	0.795284	0.0727562	0.27705
PRE7g7-SPT16-TRg-1	0.0149465	0.1463	0.0231213	0.87808
PRE7g7-NUP82-TRg-4	-0.00274943	-0.0801992	0.00446671	0.993644
PRE7g7-DML1-TRg-3	0.137167	1.71065	0.140045	0.320758
PRE7g7-RPA43-NRg-3	0.0543766	0.650982	0.0619812	0.324409
PRE7g7-STU2-NRg-3	-0.057887	-0.785929	-0.0512189	0.55448
PRE7g7-POP4-NRg-4	-0.0262608	-0.381132	-0.0208778	0.734578
PRE7g7-MCD1-TRg-2	-0.0777433	-1.04008	-0.0766814	0.393858
PRE7g7-RPS3-NRg-4	-0.152773	-2.00042	-0.147537	0.425419
PRE7g7-PRP9-TRg-4	-0.0515623	-0.704977	-0.048442	0.641772
PRE7g7-RPP1-NRg-2	0.0599078	0.721779	0.0641431	0.693384
PRE7g7-MTR2-NRg-11	-0.0667761	-0.899704	-0.0642678	0.477899
PRE7g7-GCD11-TRg-1	-0.109607	-1.44792	-0.104364	0.352279
PRE7g7-RPF1-TRg-3	-0.0456241	-0.628971	-0.0393011	0.524531
PRE7g7-SUB2-NRg-4	-0.0973085	-1.2905	-0.0918646	0.44698
PRE7g7-GPI15-TRg-3	-0.00535113	-0.113499	0.00585141	0.998952
PRE7g7-ERG9-TRg-6	0.011331	0.100022	0.0135507	0.919221
PRE7g7-RPT2-NRg-1	-0.0272716	-0.39407	-0.017137	0.842773
PRE7g7-YOS1-NRg-3	NA	NA	NA	NA
PRE7g7-SCM3-TRg-4	0.0274993	0.306967	0.0338078	0.754324
PRE7g7-SCM3-TRg-6	0.0179512	0.184758	0.0262053	0.440924
PRE7g7-RLP7-NRg-1	0.0288019	0.32364	0.031233	0.866164
PRE7g7-TFB2-NRg-4	NA	NA	NA	NA
PRE7g7-IMP4-TRg-1	-0.0169492	-0.261949	-0.0152103	0.819945
PRE7g7-IMP4-TRg-3	-0.00124164	-0.0609003	-0.00101412	0.901637
PRE7g7-PRE4-TRg-3	0.0464902	0.550041	0.0513837	0.58616
PRE7g7-SUB2-TRg-3	-0.110363	-1.45759	-0.0977099	0.496083
PRE7g7-RPP0-NRg-4	NA	NA	NA	NA
PRE7g7-RPP0-NRg-3	-0.0383951	-0.536444	-0.0366039	0.224631
PRE7g7-TOM40-TRg-4	-0.0874464	-1.16427	-0.0820382	0.226337
PRE7g7-FUR1-NRg-12	0.0387316	0.450735	0.0362405	0.74201
PRE7g7-TOM40-TRg-2	0.0150464	0.147577	0.0205472	0.658591
PRE7g7-VMA11-NRg-4	-0.00151847	-0.0644435	-0.000828055	0.933674
PRE7g7-PGS1-NRg-4	-0.145285	-1.90457	-0.14251	0.252711
PRE7g7-URB1-TRg-4	0.082215	1.0073	0.0872308	0.217399
PRE7g7-ARP4-TRg-3	0.0132009	0.123956	0.021412	0.784252
PRE7g7-RPT3-TRg-3	NA	NA	NA	NA
PRE7g7-SUI3-TRg-3	0.00474724	0.0157541	0.0114948	0.932829
PRE7g7-RFC5-NRg-2	NA	NA	NA	NA
PRE7g7-RRP14-TRg-2	0.0624596	0.754441	0.0738368	0.646042
PRE7g7-SCC2-TRg-1	NA	NA	NA	NA
PRE7g7-SSC1-TRg-3	-0.014634	-0.232315	-0.0102104	0.729992
PRE7g7-RRP9-TRg-3	0.0215258	0.230511	0.0225253	0.880536
PRE7g7-MOT1-NRg-9	NA	NA	NA	NA
PRE7g7-RPL42A-NRg-2	-0.0658862	-0.888315	-0.0635084	0.607948
PRE7g7-SEC16-TRg-7	NA	NA	NA	NA
PRE7g7-IMP4-NRg-2	0.0210286	0.224146	0.0259467	0.807873
PRE7g7-YEF3-NRg-4	-0.00701646	-0.134815	0.0010741	0.9343
PRE7g7-PUP1-TRg-1	0.0638404	0.772114	0.0712095	0.546877
PRE7g7-UTP22-TRg-6	0.0344576	0.39603	0.0359033	0.620727
PRE7g7-DBP2-NRg-4	-0.0357734	-0.502887	-0.0291222	0.667801
PRE7g7-PRE2-TRg-7	0.0190113	0.198326	0.0199986	0.71277
PRE7g7-ATP16-TRg-6	0.138299	1.72514	0.141063	0.20081
PRE7g7-UTP13-TRg-4	NA	NA	NA	NA
PRE7g7-DOP1-NRg-4	NA	NA	NA	NA
PRE7g7-TIM44-TRg-3	-0.0156446	-0.245251	-0.0117795	0.868962
PRE7g7-ATP16-TRg-2	0.118724	1.4746	0.122304	0.248183
PRE7g7-ENP1-NRg-3	-0.0344755	-0.486276	-0.0265518	0.746415
PRE7g7-NAF1-TRg-3	0.0154226	0.152392	0.0180226	0.898137
PRE7g7-COG4-TRg-2	-0.0123424	-0.202984	-0.00289557	0.940963
PRE7g7-SOG2-TRg-7	NA	NA	NA	NA
PRE7g7-YDR341C-TRg-3	-0.0557301	-0.758323	-0.0453204	0.703557
PRE7g7-YMR290W-A-TRg-10	-0.0196561	-0.296595	-0.0190372	0.758918
PRE7g7-NUP192-NRg-9	-0.00559414	-0.11661	0.00089306	0.940979
PRE7g7-RPS31-NRg-8	-0.105351	-1.39345	-0.100417	0.589865
PRE7g7-SPC97-NRg-6	NA	NA	NA	NA
PRE7g7-EBP2-NRg-1	-0.00313016	-0.0850723	0.00506367	0.990644
PRE7g7-CDC48-TRg-5	NA	NA	NA	NA
PRE7g7-RPT1-TRg-4	0.00183006	-0.0215842	0.0125655	0.945099
PRE7g7-ULP1-NRg-2	-0.156986	-2.05434	-0.154727	0.287017
PRE7g7-RPN3-TRg-6	0.0220404	0.237097	0.0373747	0.432768
PRE7g7-RPT1-TRg-5	NA	NA	NA	NA
PRE7g7-KRE5-TRg-2	-0.117162	-1.54462	-0.113375	0.393858
PRE7g7-TBF1-NRg-8	0.070107	0.852323	0.0732071	0.397487
PRE7g7-UTP22-NRg-4	-0.0190471	-0.288801	-0.0176751	0.526073
PRE7g7-SSC1-NRg-4	-0.0274364	-0.396179	-0.0245213	0.735533
PRE7g7-REB1-TRg-4	NA	NA	NA	NA
PRE7g7-CDC48-NRg-9	NA	NA	NA	NA
PRE7g7-FAS2-TRg-8	NA	NA	NA	NA
PRE7g7-TAO3-TRg-8	NA	NA	NA	NA
PRE7g7-CKS1-TRg-5	NA	NA	NA	NA
PRE7g7-YLR379W-TRg-7	-0.0615318	-0.83258	-0.0610303	0.492973
PRE7g7-TEN1-NRg-2	NA	NA	NA	NA
PRE7g7-RPL42A-TRg-2	-0.146584	-1.9212	-0.143673	0.449676
PRE7g7-SEC27-TRg-4	NA	NA	NA	NA
PRE7g7-TBF1-NRg-4	0.11482	1.42462	0.122161	0.446745
PRE7g7-RPT1-NRg-6	NA	NA	NA	NA
PRE7g7-COG1-TRg-3	NA	NA	NA	NA
PRE7g7-SUI1-TRg-6	-0.0106612	-0.181466	-0.00873674	0.488165
PRE7g7-TIM23-TRg-6	-0.0276481	-0.398888	-0.0260514	0.748889
PRE7g7-CDC48-NRg-6	-0.0835101	-1.11389	-0.0750239	0.31715
PRE7g7-EPL1-TRg-5	0.203016	2.55348	0.21518	0.311298
PRE7g7-RPT5-TRg-8	-0.00104137	-0.0583369	0.0108539	0.955901
PRE7g7-ATP16-NRg-4	0.101484	1.25393	0.10528	0.364931
PRE7g7-RPN6-TRg-3	NA	NA	NA	NA
PRE7g7-ERG9-NRg-6	NA	NA	NA	NA
PRE7g7-SMX3-TRg-1	NA	NA	NA	NA
PRE7g7-NCB2-NRg-3	0.0202565	0.214265	0.022808	0.91157
PRE7g7-SEC16-NRg-12	NA	NA	NA	NA
PRE7g7-RPN6-TRg-2	0.0360297	0.416152	0.0440578	0.775778
PRE7g7-REB1-NRg-4	0.164386	2.05904	0.175355	0.252557
PRE7g7-ATP16-TRg-9	0.133805	1.66762	0.136215	0.149239
PRE7g7-ERG9-NRg-7	NA	NA	NA	NA
PRE4g9-RPL15A-NRg-4	-0.0785761	-1.05074	-0.0790305	0.547148
PRE4g9-RPL15A-NRg-5	-0.00496024	-0.108496	-0.0049678	0.553729
PRE4g9-KRE33-TRg-1	0.0557726	0.66885	0.0564803	0.582973
PRE4g9-PMI40-NRg-1	0.064995	0.786892	0.0659232	0.449728
PRE4g9-NOP19-NRg-3	-0.018107	-0.276768	-0.0169085	0.476948
PRE4g9-SRP14-NRg-4	0.0233854	0.254313	0.0234786	0.596895
PRE4g9-SEC27-TRg-2	NA	NA	NA	NA
PRE4g9-GPI14-TRg-3	-0.0154227	-0.242409	-0.0141465	0.487356
PRE4g9-PAH1-TRg-7	0.0246786	0.270864	0.0241747	0.885303
PRE4g9-PAH1-TRg-6	0.0158831	0.158287	0.0154939	0.957127
PRE4g9-PAH1-TRg-5	0.00160417	-0.0244755	0.00121975	0.976299
PRE4g9-PAH1-TRg-3	-0.0326971	-0.463513	-0.0328591	0.711255
PRE4g9-COG3-TRg-1	0.0107171	0.0921652	0.0110847	0.962216
PRE4g9-HTS1-NRg-5	0.0143902	0.139178	0.0153591	0.827041
PRE4g9-MSN5-TRg-7	NA	NA	NA	NA
PRE4g9-ERG26-TRg-1	-0.0463055	-0.637692	-0.0456342	0.796115
PRE4g9-SMD2-TRg-5	0.0425763	0.499945	0.0440792	0.620369
PRE4g9-SMD2-TRg-4	0.00778303	0.0546105	0.00934321	0.739814
PRE4g9-SMD2-TRg-1	0.0982413	1.21243	0.0992234	0.288287
PRE4g9-PRE7-TRg-4	0.00468354	0.0149387	0.00442558	0.986202
PRE4g9-PRE7-TRg-7	0.031677	0.360441	0.0323757	0.768308
PRE4g9-SEC6-TRg-3	-0.00704325	-0.135158	-0.00689062	0.847138
PRE4g9-ESF2-NRg-1	0.0497971	0.592368	0.050674	0.603456
PRE4g9-ESF2-NRg-3	-0.0247083	-0.361261	-0.0242077	0.610886
PRE4g9-AFG2-TRg-2	0.046774	0.553674	0.0476137	0.498825
PRE4g9-RRP36-TRg-3	0.0135246	0.128099	0.0137392	0.92475
PRE4g9-RRP36-TRg-5	0.100324	1.23908	0.100974	0.368939
PRE4g9-GCR1-NRg-2	-0.0426641	-0.591085	-0.0417614	0.412217
PRE4g9-PRE4-NRg-4	-0.0738079	-0.989708	-0.0744106	0.444153
PRE4g9-PRE4-NRg-9	-0.0637998	-0.86161	-0.062746	0.479572
PRE4g9-DSN1-NRg-2	-0.0506312	-0.69306	-0.0493531	0.38207
PRE4g9-GPI11-TRg-3	-0.00921042	-0.162896	-0.00886107	0.840209
PRE4g9-POP3-TRg-1	0.0655563	0.794077	0.066601	0.275806
PRE4g9-MNE1-TRg-5	NA	NA	NA	NA
PRE4g9-RRP12-NRg-1	-0.0305428	-0.435939	-0.0297043	0.580999
PRE4g9-RSC6-TRg-2	-0.0314097	-0.447035	-0.0312232	0.786455
PRE4g9-CDC25-TRg-1	0.0391642	0.456271	0.0387206	0.537175
PRE4g9-CDC25-TRg-9	NA	NA	NA	NA
PRE4g9-YPP1-NRg-3	-0.0201779	-0.303274	-0.0202858	0.730381
PRE4g9-NFS1-NRg-9	-0.0911064	-1.21112	-0.0905396	0.379138
PRE4g9-NFS1-NRg-8	-0.0513552	-0.702326	-0.05081	0.471986
PRE4g9-UBA2-TRg-1	0.0078563	0.0555483	0.00870755	0.947543
PRE4g9-ARP2-NRg-3	NA	NA	NA	NA
PRE4g9-MAK16-TRg-1	-0.0361758	-0.508038	-0.0362613	0.581521
PRE4g9-CEP3-NRg-1	0.0285533	0.320459	0.0280644	0.82763
PRE4g9-GUK1-TRg-5	0.0293758	0.330986	0.0303682	0.633847
PRE4g9-GUK1-TRg-2	-0.014235	-0.227208	-0.0140905	0.588655
PRE4g9-GPI12-NRg-6	-0.0412009	-0.572356	-0.0412073	0.731127
PRE4g9-RPS5-NRg-5	-0.0429492	-0.594734	-0.0423267	0.681344
PRE4g9-RPS5-NRg-2	-0.0102478	-0.176175	-0.00954127	0.733423
PRE4g9-RPC19-NRg-1	0.0122163	0.111354	0.0124039	0.824814
PRE4g9-TIM54-TRg-1	-0.0355906	-0.500547	-0.0346813	0.59527
PRE4g9-TEN1-TRg-2	0.128529	1.60009	0.128275	0.231487
PRE4g9-SAH1-NRg-4	-0.0291455	-0.418054	-0.0287322	0.705457
PRE4g9-SAH1-NRg-5	-0.116146	-1.53161	-0.115852	0.403955
PRE4g9-SAH1-NRg-3	-0.0851883	-1.13537	-0.0848115	0.47301
PRE4g9-ATP15-NRg-5	-0.0850889	-1.1341	-0.0852035	0.546985
PRE4g9-SCD5-TRg-5	0.0347657	0.399974	0.0341241	0.677272
PRE4g9-ARB1-NRg-2	0.0148796	0.145442	0.0155033	0.90156
PRE4g9-ARB1-NRg-4	0.0326936	0.373452	0.0336838	0.789452
PRE4g9-PUP2-TRg-1	-0.00590984	-0.120651	-0.00548876	0.67686
PRE4g9-CCT8-TRg-2	NA	NA	NA	NA
PRE4g9-MCM4-TRg-1	0.0418142	0.490191	0.0412703	0.436269
PRE4g9-LSM4-TRg-1	-0.0637245	-0.860647	-0.0622623	0.270857
PRE4g9-NOP53-NRg-1	-0.0331031	-0.468709	-0.0330568	0.486908
PRE4g9-ATP3-TRg-4	-0.0026149	-0.0784773	-0.00175733	0.930526
PRE4g9-AFG2-NRg-3	0.00945987	0.0760731	0.0110778	0.913323
PRE4g9-PRO3-NRg-3	-0.0493663	-0.676869	-0.0479993	0.561237
PRE4g9-NRD1-NRg-10	-0.0501813	-0.687301	-0.0503507	0.458132
PRE4g9-SEC61-TRg-2	0.024899	0.273685	0.0259095	0.758423
PRE4g9-RHO3-TRg-4	-0.0235576	-0.346532	-0.0223071	0.719206
PRE4g9-SNF2-TRg-6	-0.106951	-1.41392	-0.105302	0.418698
PRE4g9-SMD2-NRg-3	0.0351173	0.404474	0.0359675	0.643449
PRE4g9-RSC4-TRg-2	0.0501404	0.596761	0.0509039	0.616028
PRE4g9-RSC4-TRg-1	0.0283119	0.317368	0.0284237	0.904666
PRE4g9-TIF34-TRg-2	0.0355931	0.410564	0.0346134	0.774604
PRE4g9-BET1-NRg-1	0.133798	1.66753	0.132566	0.603791
PRE4g9-CDC8-NRg-2	0.0191093	0.19958	0.0202462	0.720273
PRE4g9-PRP42-TRg-2	0.0974028	1.20169	0.0982193	0.318196
PRE4g9-RRB1-TRg-2	0.049498	0.588538	0.0504283	0.346975
PRE4g9-SPC24-TRg-1	0.090845	1.11776	0.090927	0.542107
PRE4g9-ILS1-NRg-1	0.0197399	0.207652	0.0205277	0.720164
PRE4g9-GFA1-TRg-2	-0.0012367	-0.0608371	-0.000960612	0.840711
PRE4g9-SEC21-NRg-10	0.0668922	0.811175	0.0670433	0.413358
PRE4g9-RPC10-NRg-1	0.0547813	0.656162	0.0546347	0.283314
PRE4g9-RPB10-TRg-3	0.0622977	0.752368	0.0622497	0.534925
PRE4g9-RPB10-TRg-2	0.099158	1.22416	0.0996484	0.289852
PRE4g9-YNL181W-TRg-1	-0.148185	-1.94169	-0.147838	0.276823
PRE4g9-RAD3-NRg-1	-0.0408706	-0.568128	-0.0395401	0.505277
PRE4g9-NOP10-TRg-1	0.0292757	0.329704	0.02959	0.809971
PRE4g9-BFR2-TRg-3	0.0105123	0.0895439	0.0110975	0.916114
PRE4g9-MCM2-TRg-6	-0.00786694	-0.145701	-0.0063134	0.891901
PRE4g9-MCM2-TRg-4	-0.0317087	-0.450862	-0.0304398	0.526911
PRE4g9-MPP10-TRg-1	0.0203874	0.21594	0.020645	0.50403
PRE4g9-RET2-TRg-4	-0.0854944	-1.13929	-0.0856356	0.497357
PRE4g9-RET2-TRg-1	0.096481	1.18989	0.0960726	0.284429
PRE4g9-RPS2-NRg-1	0.00498018	0.0187356	0.00513857	0.997243
PRE4g9-RPS2-NRg-2	0.00522584	0.0218799	0.00500251	0.988113
PRE4g9-ORC4-NRg-3	-0.0184803	-0.281545	-0.0175241	0.722373
PRE4g9-TIP20-TRg-7	-0.0298676	-0.427297	-0.0287258	0.590721
PRE4g9-SMT3-TRg-1	0.00864235	0.0656093	0.00907638	0.79662
PRE4g9-MSS18-NRg-6	-0.036444	-0.511471	-0.0351685	0.377021
PRE4g9-YEF3-NRg-9	0.00638701	0.0367422	0.00533233	0.99701
PRE4g9-ASK1-NRg-1	0.0303233	0.343113	0.031123	0.576194
PRE4g9-SMC1-TRg-1	-0.083861	-1.11838	-0.0845958	0.550289
PRE4g9-NIP1-NRg-1	-0.0548902	-0.747571	-0.0541111	0.468228
PRE4g9-RPP1-NRg-1	-0.0369684	-0.518183	-0.0363982	0.668306
PRE4g9-YDJ1-TRg-6	-0.0432779	-0.598941	-0.0431716	0.544644
PRE4g9-SUB2-NRg-1	-0.0504462	-0.690691	-0.0494414	0.449676
PRE4g9-TIM10-NRg-8	0.0472665	0.559978	0.0482661	0.703099
PRE4g9-TIM10-NRg-4	-0.0233342	-0.343672	-0.0223494	0.326441
PRE4g9-TIM10-NRg-7	0.00433917	0.0105309	0.0052603	0.996633
PRE4g9-SKI6-TRg-4	-0.0115484	-0.192821	-0.010566	0.667201
PRE4g9-TUB4-TRg-1	-0.00527228	-0.11249	-0.00426304	0.686156
PRE4g9-CDC37-NRg-2	0.00130599	-0.0282921	0.0017332	0.836892
PRE4g9-ISD11-TRg-3	-0.0530078	-0.723479	-0.0524868	0.342625
PRE4g9-YOS1-TRg-4	-0.0191457	-0.290063	-0.018261	0.766711
PRE4g9-SSC1-TRg-6	-0.0496618	-0.680652	-0.0492535	0.65992
PRE4g9-MTR3-TRg-5	-0.058228	-0.790294	-0.0574824	0.20515
PRE4g9-MTR3-TRg-6	-0.0263644	-0.382458	-0.0251685	0.505012
PRE4g9-TFA1-TRg-2	0.12867	1.60189	0.129121	0.211242
PRE4g9-CDC3-NRg-3	-0.0947435	-1.25767	-0.0936085	0.158556
PRE4g9-ERG25-TA-18	-0.0704493	-0.94672	-0.07016	0.611642
PRE4g9-RPB11-TRg-4	-0.0383472	-0.535831	-0.0374002	0.464572
PRE4g9-RPB11-TRg-1	NA	NA	NA	NA
PRE4g9-RPB11-TRg-2	0.052763	0.630328	0.0526356	0.828681
PRE4g9-DED1-TRg-3	-0.0212103	-0.316488	-0.0203307	0.759934
PRE4g9-DED1-TRg-1	-0.0492833	-0.675807	-0.0479218	0.499767
PRE4g9-DED1-TRg-6	-0.0305708	-0.436297	-0.0299454	0.624846
PRE4g9-DED1-TRg-4	-0.0303768	-0.433815	-0.0293955	0.697772
PRE4g9-RPL10-NRg-5	0.030934	0.350931	0.0317921	0.472379
PRE4g9-RPL10-NRg-4	0.0569857	0.684377	0.057989	0.288854
PRE4g9-EFB1-NRg-1	0.100858	1.24592	0.101249	0.25601
PRE4g9-EFB1-NRg-5	0.0514493	0.613514	0.0520096	0.540161
PRE4g9-EFB1-NRg-4	0.0713546	0.868291	0.0714986	0.585555
PRE4g9-RPT3-NRg-1	0.0189443	0.197468	0.0192929	0.595111
PRE4g9-SAC6-TRg-8	-0.0401723	-0.559191	-0.0389968	0.569043
PRE4g9-SAC6-TRg-4	-0.0548403	-0.746933	-0.0534161	0.193001
PRE4g9-SAC6-TRg-5	-0.142094	-1.86373	-0.14114	0.182889
PRE4g9-SAC6-TRg-3	-0.0667143	-0.898913	-0.0652693	0.226496
PRE4g9-DIM1-TRg-5	0.0353649	0.407643	0.0359049	0.693559
PRE4g9-DIM1-TRg-7	0.0235369	0.256251	0.0246897	0.404965
PRE4g9-RPC17-NRg-1	0.0784283	0.958831	0.0790875	0.384848
PRE4g9-RPC17-NRg-2	0.069383	0.843056	0.0695396	0.32381
PRE4g9-YDR341C-TRg-1	0.0268987	0.29928	0.0265706	0.776658
PRE4g9-RAP1-NRg-8	-0.0161439	-0.251641	-0.014278	0.602257
PRE4g9-RAP1-NRg-5	-0.053015	-0.72357	-0.0534672	0.449254
PRE4g9-RAP1-NRg-2	0.0665189	0.806397	0.0676154	0.208154
PRE4g9-SEC26-NRg-3	0.103115	1.27481	0.103995	0.297356
PRE4g9-SPP41-TRg-3	-0.0578745	-0.785769	-0.0579986	0.563955
PRE4g9-TAP42-NRg-1	0.124151	1.54406	0.124744	0.212317
PRE4g9-PGA2-TRg-6	0.0702054	0.853582	0.0709565	0.32877
PRE4g9-BRL1-TRg-1	-0.0293795	-0.42105	-0.0298863	0.765075
PRE4g9-FOL2-TRg-1	-0.00107532	-0.0587715	0.000236291	0.89099
PRE4g9-NAB3-NRg-5	0.00386654	0.00448162	0.00528228	0.992873
PRE4g9-SNF4-TRg-4	0.00673946	0.0412534	0.00720713	0.96595
PRE4g9-HRR25-TRg-2	-0.103886	-1.37469	-0.104577	0.369285
PRE4g9-TRS23-TRg-4	-0.0446178	-0.616091	-0.0451341	0.552555
PRE4g9-CTR86-TRg-4	0.00612207	0.0333511	0.00677684	0.987993
PRE4g9-RPB5-TRg-5	NA	NA	NA	NA
PRE4g9-SPN1-NRg-2	-0.03079	-0.439103	-0.0313587	0.565162
PRE4g9-SPN1-NRg-1	-0.00192838	-0.0696902	-0.00217875	0.97763
PRE4g9-SEC61-NRg-1	-0.0456663	-0.629511	-0.0450757	0.623524
PRE4g9-SEC61-NRg-7	0.0503804	0.599833	0.0513202	0.526079
PRE4g9-TUS1-TRg-3	0.0270856	0.301673	0.0280844	0.797767
PRE4g9-OLE1-NRg-2	-0.0654517	-0.882754	-0.0647233	0.299005
PRE4g9-AFG2-TRg-1	0.0223975	0.241668	0.0224783	0.691944
PRE4g9-TOA2-NRg-1	0.0240437	0.262738	0.0237169	0.825118
PRE4g9-USO1-TRg-1	NA	NA	NA	NA
PRE4g9-UTP22-NRg-2	0.013843	0.132174	0.0143115	0.899218
PRE4g9-RIB1-TRg-3	-0.0286658	-0.411914	-0.0283674	0.631939
PRE4g9-RIB1-TRg-7	-0.0574493	-0.780327	-0.0577112	0.592435
PRE4g9-RIB1-TRg-4	0.0313009	0.355626	0.0313948	0.73474
PRE4g9-COG1-TRg-1	-0.182367	-2.37921	-0.182786	0.385296
PRE4g9-RPL32-NRg-2	-0.0352557	-0.496261	-0.0346638	0.674652
PRE4g9-GLC7-NRg-3	-0.108247	-1.43051	-0.107346	0.208297
PRE4g9-GLC7-NRg-4	-0.0674611	-0.908473	-0.0668539	0.445988
PRE4g9-HSF1-TRg-2	0.0441572	0.52018	0.0447808	0.245645
PRE4g9-DAM1-NRg-5	0.0408266	0.47755	0.0417682	0.541772
PRE4g9-SEC18-TRg-4	-0.0375217	-0.525265	-0.0374657	0.367466
PRE4g9-SEC18-TRg-5	-0.0377477	-0.528158	-0.0374953	0.722151
PRE4g9-PAB1-NRg-3	-0.0101096	-0.174405	-0.00981043	0.868922
PRE4g9-POP8-TRg-2	-0.0183555	-0.279948	-0.0174268	0.693126
PRE4g9-PAB1-NRg-4	-0.0419468	-0.581904	-0.0414699	0.533546
PRE4g9-BIG1-TRg-4	-0.0925208	-1.22922	-0.0925992	0.425832
PRE4g9-BIG1-TRg-5	0.00736372	0.0492435	0.00730756	0.981573
PRE4g9-BIG1-TRg-6	-0.0605725	-0.820302	-0.0602739	0.607492
PRE4g9-RPO41-NRg-1	-0.0229254	-0.338441	-0.0220579	0.479572
PRE4g9-RVB2-NRg-2	-0.034802	-0.490454	-0.0335344	0.352244
PRE4g9-PET117-NRg-8	-0.0052216	-0.111842	-0.00530375	0.836674
PRE4g9-VPS45-NRg-9	-0.0374827	-0.524766	-0.0365662	0.567345
PRE4g9-YCG1-NRg-1	0.047182	0.558896	0.0470685	0.610055
PRE4g9-NOC4-NRg-1	0.00443018	0.0116959	0.00535728	0.992873
PRE4g9-NMD3-NRg-2	0.00384316	0.00418233	0.00512258	0.983188
PRE4g9-DRS1-TRg-2	0.0607406	0.732438	0.0613731	0.45369
PRE4g9-HTB1-NRg-2	-0.0799106	-1.06782	-0.0791363	0.372882
PRE4g9-IPI1-TRg-2	-0.0008292	-0.0556213	-0.000846879	0.95409
PRE4g9-SEC18-NRg-1	0.000215611	-0.0422483	-0.000957758	0.958044
PRE4g9-SEC18-NRg-2	NA	NA	NA	NA
PRE4g9-JIP5-NRg-2	-0.00248717	-0.0768424	-0.00109099	0.624801
PRE4g9-YPT1-TRg-3	-0.133412	-1.75261	-0.134026	0.288206
PRE4g9-YPT1-TRg-2	NA	NA	NA	NA
PRE4g9-CLF1-NRg-2	0.0599096	0.721802	0.0602486	0.631946
PRE4g9-SNF2-NRg-7	0.0202806	0.214572	0.0216125	0.852638
PRE4g9-SNF2-NRg-4	-0.0636064	-0.859134	-0.0615178	0.306383
PRE4g9-RPL25-NRg-1	-0.0148779	-0.235437	-0.0149728	0.594193
PRE4g9-NOP56-TRg-1	-0.00804264	-0.147949	-0.00665257	0.835734
PRE4g9-NOP56-TRg-2	0.0279599	0.312863	0.0290754	0.466745
PRE4g9-TRS31-TRg-1	-0.0837775	-1.11731	-0.0847721	0.393858
PRE4g9-DBF4-TRg-2	0.074949	0.914297	0.0745889	0.402264
PRE4g9-DBF4-TRg-1	0.0245577	0.269317	0.0249314	0.757911
PRE4g9-RPC19-TRg-4	0.103054	1.27403	0.103555	0.196809
PRE4g9-RPC19-TRg-6	0.0791133	0.967599	0.0793862	0.486823
PRE4g9-RPC19-TRg-3	0.0377233	0.43783	0.0378626	0.65748
PRE4g9-ROK1-NRg-1	-0.0299142	-0.427893	-0.0292414	0.550078
PRE4g9-CDC33-TRg-4	-0.0156924	-0.245862	-0.0143112	0.821991
PRE4g9-DHR2-TRg-3	0.0646248	0.782154	0.0654119	0.193675
PRE4g9-RRP42-NRg-5	-0.028208	-0.406055	-0.027088	0.557021
PRE4g9-CLF1-TRg-1	0.138908	1.73294	0.138988	0.256923
PRE4g9-ERG11-NA-16	-0.11994	-1.58017	-0.119045	0.405582
PRE4g9-VAS1-NRg-4	0.0261477	0.289669	0.0259449	0.774719
PRE4g9-PIK1-NRg-2	0.0307722	0.348859	0.0312355	0.661459
PRE4g9-SAR1-NRg-7	-0.124284	-1.63577	-0.123676	0.234413
PRE4g9-SAR1-NRg-4	-0.0967693	-1.2836	-0.0972914	0.555001
PRE4g9-RPS3-TRg-1	-0.095306	-1.26487	-0.0952063	0.218226
PRE4g9-YTM1-TRg-2	0.10085	1.24582	0.101411	0.217623
PRE4g9-SUI3-NRg-5	-0.0241781	-0.354474	-0.0231473	0.518523
PRE4g9-SUI3-NRg-2	0.00899818	0.0701637	0.0103459	0.916637
PRE4g9-RRP7-TRg-4	0.0193209	0.202289	0.0203278	0.653465
PRE4g9-RRP7-TRg-6	-0.0299912	-0.428879	-0.0299147	0.603005
PRE4g9-NIP7-TRg-2	0.0174472	0.178306	0.0179849	0.809971
PRE4g9-MDM35-TRg-1	-0.0656725	-0.88558	-0.0647657	0.344019
PRE4g9-ALA1-NRg-1	0.0413217	0.483887	0.0423063	0.550963
PRE4g9-DOA4-NRg-2	0.00880484	0.0676891	0.00987641	0.922514
PRE4g9-RPS13-NRg-1	-0.052149	-0.712487	-0.0526537	0.577708
PRE4g9-YSF3-TRg-2	0.0804919	0.985244	0.0816042	0.325037
PRE4g9-RPS2-NRg-11	-0.157399	-2.05963	-0.157168	0.159349
PRE4g9-SSL1-TRg-10	-0.00833492	-0.15169	-0.00761275	0.726369
PRE4g9-NIP7-TRg-1	0.0438378	0.516092	0.0447948	0.57997
PRE4g9-LST8-NRg-1	NA	NA	NA	NA
PRE4g9-TAF4-TRg-3	NA	NA	NA	NA
PRE4g9-HAS1-TRg-2	0.0151646	0.14909	0.0151596	0.935506
PRE4g9-GLC7-TRg-2	NA	NA	NA	NA
PRE4g9-CDC45-NRg-1	0.0766663	0.936278	0.0766981	0.37111
PRE4g9-SEC22-NRg-8	0.0634805	0.767507	0.0631679	0.422756
PRE4g9-YOS1-TRg-2	0.0442833	0.521794	0.044045	0.488119
PRE4g9-RBA50-TRg-3	-0.00505963	-0.109768	-0.00359475	0.495797
PRE4g9-SPP41-NRg-2	0.00118595	-0.0298285	0.00165755	0.845434
PRE4g9-PRP46-TRg-2	0.0700562	0.851673	0.0709952	0.516796
PRE4g9-PGA2-NRg-1	0.0751339	0.916664	0.0761199	0.183952
PRE4g9-CBF5-TRg-3	0.0557429	0.668471	0.0568039	0.429725
PRE4g9-TCP1-NRg-3	0.0676681	0.821106	0.0683811	0.44698
PRE4g9-TCP1-NRg-2	0.0935277	1.1521	0.093441	0.395536
PRE4g9-ERG26-NRg-2	-0.0488066	-0.669706	-0.0488778	0.640404
PRE4g9-ERG26-NRg-4	-0.038488	-0.537632	-0.0382503	0.486914
PRE4g9-MES1-TRg-5	0.0434855	0.511583	0.0444214	0.509152
PRE4g9-HTS1-TRg-2	-0.000809136	-0.0553645	-0.000236501	0.873674
PRE4g9-SSS1-TRg-3	-0.0366241	-0.513775	-0.0365014	0.546989
PRE4g9-SSS1-TRg-2	0.0158417	0.157756	0.015706	0.940892
PRE4g9-SYS1-TRg-7	-0.0798361	-1.06687	-0.0793179	0.259812
PRE4g9-SYS1-TRg-2	-0.0642356	-0.867189	-0.0643969	0.496197
PRE4g9-SYS1-TRg-1	0.0030359	-0.0061502	0.00288285	0.979916
PRE4g9-BFR2-TRg-1	0.0675065	0.819038	0.0682464	0.392983
PRE4g9-EOS1-TRg-3	-0.100026	-1.32528	-0.0992924	0.106173
PRE4g9-TAF4-NRg-1	0.000110902	-0.0435885	-0.000595014	0.922852
PRE4g9-ARL3-NRg-8	0.155508	1.94541	0.15584	0.307926
PRE4g9-RPN5-NRg-1	0.0380437	0.441931	0.0386461	0.533201
PRE4g9-TIM9-NRg-2	-0.0218685	-0.324912	-0.0209606	0.685979
PRE4g9-NUP57-NRg-3	-0.0169391	-0.26182	-0.0170757	0.754278
PRE4g9-VPS4-TRg-1	-0.0266472	-0.386078	-0.0263524	0.636491
PRE4g9-CDC3-TRg-4	-0.13074	-1.7184	-0.129601	0.35061
PRE4g9-BBP1-NRg-1	-0.016249	-0.252986	-0.015405	0.692567
PRE4g9-BBP1-NRg-2	0.0142384	0.137236	0.0144131	0.778576
PRE4g9-USE1-NRg-3	-0.00270478	-0.0796276	-0.00235931	0.901637
PRE4g9-CCT7-TRg-1	0.0203708	0.215726	0.0216251	0.885793
PRE4g9-SAH1-TRg-3	-0.0554199	-0.754352	-0.0545716	0.46292
PRE4g9-CHS2-TRg-1	-0.0530122	-0.723535	-0.0518194	0.700693
PRE4g9-DPM1-TRg-2	0.0321069	0.365942	0.0333217	0.236241
PRE4g9-BBP1-TRg-1	0.0441744	0.5204	0.0432172	0.572359
PRE4g9-NRD1-TRg-4	0.00752757	0.0513407	0.00797944	0.944657
PRE4g9-RPB3-NRg-1	-0.0438733	-0.606562	-0.044546	0.294187
PRE4g9-PHO85-NRg-6	-0.0406038	-0.564714	-0.0400129	0.541996
PRE4g9-SNF6-TRg-6	-0.102082	-1.35161	-0.101198	0.19737
PRE4g9-PRP38-NRg-2	0.00103661	-0.0317399	0.00145768	0.899086
PRE4g9-OAR1-NRg-3	-0.0307246	-0.438266	-0.0295715	0.438418
PRE4g9-ROX3-NRg-1	0.00387556	0.00459708	0.0052096	0.982962
PRE4g9-YPP1-TRg-6	0.0363422	0.420151	0.0363429	0.523392
PRE4g9-CBF2-NRg-8	0.0183813	0.190262	0.0197853	0.495957
PRE4g9-SPT6-TRg-5	-0.0443146	-0.612211	-0.0440516	0.582769
PRE4g9-SEC10-NRg-1	NA	NA	NA	NA
PRE4g9-NSL1-NRg-3	-0.0797086	-1.06523	-0.0808556	0.21389
PRE4g9-NRD1-NRg-8	0.00983832	0.080917	0.0105503	0.931005
PRE4g9-RPB3-TRg-1	-0.0405199	-0.56364	-0.0404967	0.474989
PRE4g9-NRD1-NRg-4	0.0644402	0.779791	0.0649074	0.504382
PRE4g9-RVB1-TRg-2	-0.00700739	-0.134699	-0.00751894	0.604218
PRE4g9-TIF5-NRg-8	0.300527	3.80157	0.300769	0.193074
PRE4g9-EOS1-NRg-1	-0.0743143	-0.99619	-0.0740637	0.261854
PRE4g9-ERG25-NA-26	-0.0475518	-0.653645	-0.0464612	0.468182
PRE4g9-MSL5-NRg-4	-0.0527313	-0.719939	-0.051284	0.493466
PRE4g9-SEC24-TRg-2	0.0463075	0.547702	0.0454555	0.640784
PRE4g9-RPL30-NRg-5	-0.0454267	-0.626445	-0.0454132	0.670131
PRE4g9-SNU71-NRg-3	0.0911112	1.12116	0.0920946	0.333796
PRE4g9-CDC33-NRg-1	-0.00578893	-0.119103	-0.00501055	0.811902
PRE4g9-RPN6-TRg-4	0.0145439	0.141146	0.0153647	0.90513
PRE4g9-NAB2-TRg-4	-0.0488097	-0.669745	-0.0487517	0.310608
PRE4g9-NAB2-TRg-6	-0.00898655	-0.160031	-0.00821521	0.661116
PRE4g9-YTM1-NRg-1	0.0876363	1.07669	0.088333	0.402124
PRE4g9-OLE1-TRg-8	-0.0576989	-0.783522	-0.0564631	0.360984
PRE4g9-OLE1-TRg-1	-0.0659102	-0.888622	-0.0649868	0.54698
PRE4g9-UTP7-TRg-4	-0.0599233	-0.811993	-0.0592659	0.485594
PRE4g9-ACT1-NRg-6	-0.0741657	-0.994287	-0.0740045	0.307603
PRE4g9-RPL18A-NRg-3	-0.0276814	-0.399314	-0.0274981	0.649172
PRE4g9-BRX1-NRg-1	0.026324	0.291924	0.0268709	0.712082
PRE4g9-NAF1-TRg-8	0.0324834	0.370761	0.0332362	0.678269
PRE4g9-NAF1-TRg-6	-0.00465866	-0.104636	-0.00405147	0.884603
PRE4g9-NAF1-TRg-4	0.0240417	0.262712	0.0247154	0.6396
PRE4g9-CDC8-TRg-2	0.0585237	0.704063	0.0593505	0.426605
PRE4g9-NSE4-TRg-1	-0.00584372	-0.119804	-0.00555946	0.833879
PRE4g9-PAB1-NRg-2	-0.00801846	-0.14764	-0.00820067	0.921515
PRE4g9-PRP43-TRg-4	NA	NA	NA	NA
PRE4g9-SEC2-NRg-3	-0.0642598	-0.867498	-0.063393	0.44858
PRE4g9-SEC2-NRg-6	-0.0361948	-0.508282	-0.0350626	0.259812
PRE4g9-MPP10-NRg-5	0.00270832	-0.010343	0.00353978	0.933404
PRE4g9-YDR355C-TRg-2	0.109336	1.35443	0.109364	0.293031
PRE4g9-YLR339C-TRg-9	0.0195051	0.204647	0.0195814	0.709268
PRE4g9-SNM1-TRg-2	0.0304267	0.344436	0.0306535	0.833679
PRE4g9-ALR1-NRg-4	-0.0939258	-1.24721	-0.0936824	0.269466
PRE4g9-ALR1-NRg-1	-0.0819365	-1.09375	-0.0817767	0.280451
PRE4g9-ALR1-NRg-3	0.0143957	0.139249	0.0146314	0.84251
PRE4g9-RPL10-TRg-1	0.0267217	0.297015	0.0276465	0.75982
PRE4g9-RPL28-TRg-2	-0.00252496	-0.0773261	-0.00191614	0.861049
PRE4g9-UTP25-TRg-1	0.0233158	0.253422	0.0241893	0.678251
PRE4g9-POB3-TRg-1	0.000199425	-0.0424555	0.00022197	0.924966
PRE4g9-POB3-TRg-3	-0.00783049	-0.145234	-0.00816246	0.707649
PRE4g9-POB3-TRg-2	0.0963115	1.18773	0.0966542	0.51727
PRE4g9-MED11-TRg-1	0.0321541	0.366547	0.0321993	0.827131
PRE4g9-ISA1-TRg-15	NA	NA	NA	NA
PRE4g9-RRP1-NRg-1	0.0397816	0.464175	0.0408753	0.292442
PRE4g9-MES1-NRg-1	-0.074227	-0.995072	-0.0746271	0.354051
PRE4g9-SEC13-NRg-5	NA	NA	NA	NA
PRE4g9-MCM2-NRg-2	-0.032425	-0.46003	-0.0314653	0.327281
PRE4g9-ALA1-TRg-4	-0.0154421	-0.242659	-0.0156752	0.747581
PRE4g9-MTG2-TRg-5	-0.00982735	-0.170793	-0.00927802	0.736372
PRE4g9-TIF35-NRg-3	0.0624043	0.753732	0.063463	0.50036
PRE4g9-NSE1-TRg-3	-0.022795	-0.336772	-0.0217681	0.740253
PRE4g9-NSE1-TRg-4	0.00822281	0.0602395	0.00905206	0.970167
PRE4g9-MOB2-NRg-6	-0.0345275	-0.48694	-0.0345039	0.701544
PRE4g9-VRG4-NRg-3	-0.0320708	-0.455496	-0.032224	0.765476
PRE4g9-PRP9-TRg-3	0.02572	0.284194	0.0255561	0.682285
PRE4g9-HYM1-TRg-5	-0.039741	-0.55367	-0.0403527	0.810388
PRE4g9-POP1-TRg-5	0.0452054	0.533596	0.0454678	0.485104
PRE4g9-POP1-TRg-9	0.0508741	0.606152	0.051638	0.233865
PRE4g9-RPL17A-TRg-1	0.023195	0.251875	0.0241588	0.504572
PRE4g9-SLD2-TRg-1	0.0280443	0.313943	0.0282582	0.553642
PRE4g9-CDC48-NRg-7	0.104512	1.29269	0.105014	0.240243
PRE4g9-FHL1-NRg-2	-0.0545621	-0.743372	-0.0536341	0.382868
PRE4g9-BET3-NRg-7	0.0507817	0.60497	0.0520717	0.396375
PRE4g9-MAK21-TRg-1	-0.0183999	-0.280516	-0.0177253	0.328216
PRE4g9-BRN1-TRg-4	-0.0455294	-0.627759	-0.0461988	0.651423
PRE4g9-FBA1-NRg-3	0.00591521	0.0307034	0.0073053	0.98198
PRE4g9-CDC42-TRg-6	NA	NA	NA	NA
PRE4g9-CDC42-TRg-7	-0.0177537	-0.272246	-0.0174302	0.707104
PRE4g9-COG4-NRg-1	-0.017412	-0.267872	-0.0168813	0.603885
PRE4g9-ATP3-NRg-3	-0.00728279	-0.138224	-0.00605532	0.770301
PRE4g9-ATP3-NRg-2	-0.00679547	-0.131986	-0.00559962	0.824551
PRE4g9-SMP3-TRg-5	-0.0441134	-0.609635	-0.0426241	0.532382
PRE4g9-CFT2-NRg-2	-0.0910842	-1.21084	-0.091581	0.371203
PRE4g9-FAS2-TRg-5	0.122058	1.51726	0.122353	0.283883
PRE4g9-DBP2-NRg-3	-0.0124123	-0.203879	-0.0113847	0.759612
PRE4g9-DBP2-NRg-2	0.00860031	0.0650712	0.0094068	0.804888
PRE4g9-MPS2-NRg-4	0.0119595	0.108067	0.0118299	0.921109
PRE4g9-ARC35-TRg-2	-0.037908	-0.530209	-0.0383134	0.799572
PRE4g9-ARC35-TRg-5	NA	NA	NA	NA
PRE4g9-MRD1-TRg-1	-0.0158164	-0.247449	-0.0152784	0.812332
PRE4g9-RLP7-TRg-1	-0.00484746	-0.107053	-0.00417538	0.929988
PRE4g9-SPC34-TRg-1	0.10846	1.34322	0.10887	0.180326
PRE4g9-CDC45-TRg-2	0.028612	0.32121	0.0294188	0.449676
PRE4g9-GCD6-TRg-3	0.0749257	0.913999	0.0752264	0.507599
PRE4g9-GCD6-TRg-4	0.0606187	0.730878	0.0608256	0.0905538
PRE4g9-YPT6-NRg-2	NA	NA	NA	NA
PRE4g9-RPS13-TRg-2	-0.00850315	-0.153844	-0.00807943	0.459399
PRE4g9-IPI3-TRg-3	0.0703365	0.85526	0.0714604	0.359177
PRE4g9-TIF5-NRg-9	NA	NA	NA	NA
PRE4g9-TIF5-NRg-7	0.0237092	0.258457	0.0245707	0.556088
PRE4g9-TIF5-NRg-6	-0.0452954	-0.624764	-0.0455004	0.703199
PRE4g9-NAB3-TRg-3	NA	NA	NA	NA
PRE4g9-GCD2-TRg-1	0.14102	1.75997	0.140842	0.208154
PRE4g9-UBA1-TRg-2	-0.0307966	-0.439188	-0.0310699	0.653915
PRE4g9-SLD3-TRg-6	NA	NA	NA	NA
PRE4g9-LCB1-TRg-5	0.0794799	0.972291	0.0803258	0.293724
PRE4g9-TOA2-TRg-6	0.0715386	0.870646	0.0709793	0.629903
PRE4g9-TOA2-TRg-1	0.07789	0.95194	0.078389	0.499654
PRE4g9-TOA2-TRg-3	0.0485557	0.576478	0.0484498	0.689138
PRE4g9-LSM2-TRg-1	0.030951	0.351148	0.0316726	0.69464
PRE4g9-YML6-TRg-13	-0.018088	-0.276524	-0.016691	0.637181
PRE4g9-YML6-TRg-12	-0.0240932	-0.353387	-0.0227076	0.53727
PRE4g9-UTP15-NRg-1	-0.0234389	-0.345013	-0.0234635	0.404623
PRE4g9-TIF6-NRg-8	0.08352	1.024	0.0843835	0.329401
PRE4g9-SUP35-NRg-1	0.0234905	0.255658	0.0233623	0.6007
PRE4g9-MPP10-NRg-1	0.0239189	0.26114	0.0247106	0.348752
PRE4g9-SWI3-TRg-7	-0.097788	-1.29664	-0.0967529	0.30567
PRE4g9-SSN3-NRg-2	0.0347554	0.399841	0.0358155	0.700671
PRE4g9-SEC13-NRg-7	0.0670119	0.812708	0.0665333	0.337464
PRE4g9-RPS15-NRg-3	-0.156068	-2.04259	-0.156132	0.196712
PRE4g9-RPL3-TRg-2	0.0340233	0.390472	0.0348635	0.540505
PRE4g9-FBA1-NRg-2	0.0243235	0.266319	0.0256871	0.569189
PRE4g9-FBA1-NRg-1	-0.00476866	-0.106044	-0.00317246	0.849836
PRE4g9-FBA1-NRg-5	-0.0726887	-0.975383	-0.0711602	0.418959
PRE4g9-DAM1-TRg-2	NA	NA	NA	NA
PRE4g9-NHP2-TRg-2	0.0286427	0.321603	0.0294697	0.208007
PRE4g9-HCA4-NRg-6	0.0112538	0.0990346	0.0118615	0.811205
PRE4g9-PRE3-TRg-4	NA	NA	NA	NA
PRE4g9-DBP5-NRg-4	-0.00588243	-0.1203	-0.0060154	0.886227
PRE4g9-SPT6-NRg-4	0.0681281	0.826993	0.0691365	0.274994
PRE4g9-SPT6-NRg-2	0.0157769	0.156928	0.0167071	0.931646
PRE4g9-RPL18A-TRg-4	0.0218828	0.235079	0.0223004	0.840731
PRE4g9-KSH1-TRg-1	0.0372633	0.431942	0.0378308	0.753523
PRE4g9-KSH1-TRg-3	0.0135519	0.128449	0.0146172	0.935819
PRE4g9-IPI3-NRg-1	-0.00131665	-0.0618603	-0.000957492	0.948435
PRE4g9-PGA2-TRg-8	0.0383383	0.445701	0.0396218	0.472172
PRE4g9-RPL18A-TRg-2	0.00189987	-0.0206907	0.0027927	0.953173
PRE4g9-RPL33A-NRg-6	-0.013033	-0.211824	-0.0126447	0.836319
PRE4g9-TAF12-NRg-2	-0.0223021	-0.330463	-0.0215204	0.390181
PRE4g9-USE1-TRg-5	-0.022328	-0.330794	-0.020877	0.675619
PRE4g9-YNL114C-TRg-1	0.0891446	1.09599	0.0899397	0.193074
PRE4g9-SMC5-TRg-7	-0.0610611	-0.826556	-0.0600552	0.154575
PRE4g9-SMC5-TRg-6	0.0238846	0.260702	0.0247977	0.790546
PRE4g9-RSC58-TRg-1	0.0268586	0.298767	0.0278103	0.710756
PRE4g9-CTF13-TRg-2	0.0149575	0.14644	0.0144126	0.870599
PRE4g9-NAB2-NRg-2	0.0450906	0.532127	0.045175	0.659429
PRE4g9-MCM7-TRg-4	-0.0902002	-1.19952	-0.0900623	0.299651
PRE4g9-BCP1-NRg-5	-0.092561	-1.22974	-0.0930133	0.47863
PRE4g9-STU2-TRg-3	-0.0216469	-0.322077	-0.022294	0.627595
PRE4g9-SEC21-NRg-6	0.0467557	0.553439	0.0468993	0.739946
PRE4g9-SEC21-NRg-3	-0.0272957	-0.394377	-0.0275942	0.366144
PRE4g9-RPL1B-TRg-3	0.0189779	0.197898	0.0195834	0.815077
PRE4g9-SEC20-NRg-2	0.0600825	0.724014	0.060993	0.439255
PRE4g9-VMA3-NRg-2	-0.0339024	-0.47894	-0.032938	0.541055
PRE4g9-SEC23-NRg-5	-0.113725	-1.50062	-0.112429	0.303617
PRE4g9-CDC28-TRg-4	-0.0133752	-0.216203	-0.0127223	0.83981
PRE4g9-RPN12-NRg-11	0.0193201	0.202278	0.0203601	0.867235
PRE4g9-PUP3-TRg-3	-0.03126	-0.445118	-0.0316432	0.730591
PRE4g9-SEC31-TRg-2	-0.0148039	-0.234489	-0.0148992	0.783796
PRE4g9-SED5-TRg-6	-0.0221911	-0.329042	-0.0217814	0.775152
PRE4g9-SED5-TRg-5	-0.0223018	-0.330459	-0.0211505	0.499767
PRE4g9-RPL33A-TRg-1	0.0257875	0.285058	0.0266208	0.625815
PRE4g9-RPL33A-TRg-2	-0.0306068	-0.436758	-0.0297854	0.706419
PRE4g9-MRPL11-TRg-2	-0.0209835	-0.313585	-0.0197288	0.810206
PRE4g9-RTP1-NRg-2	-0.0195129	-0.294763	-0.0192383	0.780074
PRE4g9-NUG1-TRg-2	0.0528351	0.631252	0.0532502	0.676569
PRE4g9-VPH2-TRg-4	-0.00420793	-0.0988671	-0.0034113	0.793257
PRE4g9-COP1-NRg-3	0.106806	1.32205	0.106354	0.155692
PRE4g9-CRM1-NRg-1	-0.0277561	-0.400271	-0.0278629	0.630846
PRE4g9-RPL5-NRg-4	-0.0249067	-0.3638	-0.0255022	0.787186
PRE4g9-SNU13-NRg-4	0.156778	1.96166	0.156813	0.314494
PRE4g9-PFS2-TRg-3	-0.0528395	-0.721324	-0.0536282	0.540443
PRE4g9-MPP10-TRg-2	0.021379	0.228632	0.021955	0.766919
PRE4g9-TSR4-NRg-2	0.0426619	0.50104	0.0435176	0.56976
PRE4g9-RSC2-TRg-1	0.0236758	0.258029	0.0248481	0.717719
PRE4g9-SEC65-TRg-2	0.140201	1.74948	0.140309	0.297891
PRE4g9-SMI1-NRg-1	0.0841656	1.03227	0.0851137	0.351229
PRE4g9-RTT105-NRg-4	-0.019552	-0.295262	-0.0184118	0.529889
PRE4g9-VMA5-TRg-3	-0.0221017	-0.327897	-0.0214635	0.619445
PRE4g9-VMA5-TRg-5	-0.0219648	-0.326145	-0.0205097	0.604142
PRE4g9-RRP1-TRg-3	0.165676	2.07555	0.166442	0.298076
PRE4g9-CLC1-TRg-2	0.0369173	0.427513	0.0367567	0.149893
PRE4g9-GCD6-NRg-1	0.0236657	0.257899	0.0237718	0.825427
PRE4g9-GCD6-NRg-2	0.0716625	0.872233	0.07221	0.439199
PRE4g9-PXR1-TRg-1	0.017454	0.178393	0.0181451	0.342418
PRE4g9-CDC14-NRg-1	0.0750967	0.916188	0.0756677	0.520717
PRE4g9-PCF11-TRg-6	-0.00450853	-0.102715	-0.00542257	0.777092
PRE4g9-PCF11-TRg-5	NA	NA	NA	NA
PRE4g9-PCF11-TRg-4	NA	NA	NA	NA
PRE4g9-SEC31-NRg-1	NA	NA	NA	NA
PRE4g9-RRP5-NRg-1	0.00769353	0.0534649	0.00798133	0.97465
PRE4g9-PRE10-TRg-5	-0.0159548	-0.24922	-0.0164252	0.247984
PRE4g9-PRE10-TRg-1	-0.0805906	-1.07652	-0.0804204	0.384214
PRE4g9-RPS5-TRg-2	-0.0157896	-0.247106	-0.0155875	0.420712
PRE4g9-NSP1-TRg-4	0.0750237	0.915254	0.0751389	0.305774
PRE4g9-PRP38-TRg-4	-0.00287242	-0.0817733	-0.00210922	0.73459
PRE4g9-RCF1-NRg-5	-0.0292324	-0.419166	-0.0284312	0.565038
PRE4g9-RSC3-TRg-4	-0.00652565	-0.128533	-0.00525748	0.742127
PRE4g9-RSC3-TRg-5	-0.00437858	-0.101051	-0.00353403	0.684769
PRE4g9-RSC3-TRg-6	-0.0316031	-0.44951	-0.0305426	0.526004
PRE4g9-HTA1-NRg-12	0.00527407	0.0224971	0.00651903	0.91046
PRE4g9-HTA1-NRg-11	0.0146058	0.141938	0.0157961	0.850941
PRE4g9-UTP23-TRg-2	-0.0145661	-0.231446	-0.0136059	0.477899
PRE4g9-GCD7-NRg-1	-0.0063664	-0.126494	-0.00687477	0.897011
PRE4g9-GCD7-NRg-2	0.0228983	0.248077	0.0237351	0.871736
PRE4g9-GCD7-NRg-6	-0.000811221	-0.0553912	0.000263676	0.921528
PRE4g9-GAL11-NRg-2	-0.035513	-0.499554	-0.0348048	0.269269
PRE4g9-GAL11-NRg-9	0.0248334	0.272846	0.0253422	0.820423
PRE4g9-PHO4-TRg-5	0.0758291	0.925562	0.0763178	0.544458
PRE4g9-SNP1-NRg-3	0.0612251	0.738639	0.0620604	0.611577
PRE4g9-RPC37-TRg-5	0.0779089	0.952182	0.0782497	0.333198
PRE4g9-CRM1-TRg-5	0.00677979	0.0417695	0.00716244	0.978777
PRE4g9-CRM1-TRg-2	-0.00897506	-0.159884	-0.00818291	0.822928
PRE4g9-ASK1-TRg-7	NA	NA	NA	NA
PRE4g9-STU2-NRg-4	-0.0139327	-0.223338	-0.0141639	0.777307
PRE4g9-NEO1-NRg-3	NA	NA	NA	NA
PRE4g9-GAL11-TRg-5	-0.0439139	-0.607082	-0.0432941	0.443291
PRE4g9-GAL11-TRg-7	-0.0856093	-1.14076	-0.0845134	0.284429
PRE4g9-SAM50-NRg-3	-0.0077533	-0.144246	-0.00653444	0.899026
PRE4g9-CSL4-TRg-2	0.000577325	-0.0376186	0.0014915	0.890099
PRE4g9-CCT5-TRg-2	0.155213	1.94164	0.155896	0.366144
PRE4g9-POL30-NRg-1	-0.00485874	-0.107197	-0.00378801	0.471514
PRE4g9-MED4-TRg-4	0.0352633	0.406343	0.0356483	0.489514
PRE4g9-MED4-TRg-3	0.0325215	0.37125	0.033093	0.662982
PRE4g9-MED4-TRg-2	0.0598268	0.720742	0.06061	0.366624
PRE4g9-GDI1-TRg-4	-0.059041	-0.8007	-0.0585419	0.411096
PRE4g9-GDI1-TRg-3	-0.0952608	-1.26429	-0.0946615	0.215549
PRE4g9-REB1-TRg-6	NA	NA	NA	NA
PRE4g9-MRPL37-NRg-2	0.01489	0.145576	0.0163164	0.774267
PRE4g9-NOC3-TRg-3	0.0282543	0.316631	0.0289324	0.841871
PRE4g9-SPC97-TRg-3	NA	NA	NA	NA
PRE4g9-IPP1-TRg-3	0.0558582	0.669946	0.0560583	0.38207
PRE4g9-IPP1-TRg-2	0.0617214	0.744992	0.0611289	0.545181
PRE4g9-PTI1-TRg-3	NA	NA	NA	NA
PRE4g9-PTI1-TRg-5	-0.108904	-1.43892	-0.109246	0.605186
PRE4g9-RFC5-NRg-1	0.0163474	0.164229	0.0171722	0.695279
PRE4g9-CDC24-TRg-1	0.00439771	0.0112802	0.00503752	0.99193
PRE4g9-CDC24-TRg-3	-0.097382	-1.29144	-0.0976658	0.313161
PRE4g9-CDC24-TRg-5	NA	NA	NA	NA
PRE4g9-CDC24-TRg-6	0.020087	0.212094	0.0197375	0.892695
PRE4g9-UTP23-TRg-6	-0.0123172	-0.202662	-0.0113072	0.582246
PRE4g9-UTP23-TRg-4	-0.00767329	-0.143222	-0.00714491	0.815424
PRE4g9-UTP23-TRg-1	0.0113976	0.100875	0.0119119	0.919514
PRE4g9-RHO3-NRg-4	-0.016395	-0.254855	-0.015022	0.585456
PRE4g9-TRS23-NRg-1	-0.0313364	-0.446097	-0.0318481	0.690159
PRE4g9-TRS23-NRg-3	-0.104144	-1.37799	-0.104325	0.479857
PRE4g9-RSP5-TRg-2	-0.0481516	-0.661322	-0.0477234	0.272267
PRE4g9-RSP5-TRg-1	-0.0302957	-0.432776	-0.0297229	0.641682
PRE4g9-SDA1-NRg-1	0.0804032	0.984109	0.0809622	0.323651
PRE4g9-KAP95-TRg-8	-0.0715661	-0.961014	-0.0721739	0.523206
PRE4g9-ACO1-TRg-6	-0.0375369	-0.525459	-0.0381475	0.746093
PRE4g9-HTA1-NRg-3	-0.0236787	-0.348083	-0.0225469	0.488783
PRE4g9-HTA1-NRg-2	-0.0298502	-0.427073	-0.0293068	0.649301
PRE4g9-SPN1-TRg-1	0.0348496	0.401047	0.0351059	0.608694
PRE4g9-MOT1-NRg-7	0.0274047	0.305757	0.0284076	0.597872
PRE4g9-RPL17A-NRg-4	0.0340454	0.390754	0.0346341	0.626324
PRE4g9-ADA2-TRg-4	-0.0478008	-0.656832	-0.0465807	0.308664
PRE4g9-SFH1-NRg-1	-0.0500342	-0.685418	-0.0490335	0.57727
PRE4g9-SPC97-NRg-5	NA	NA	NA	NA
PRE4g9-PRP22-TRg-3	0.0114475	0.101514	0.0107791	0.971035
PRE4g9-SEN15-TRg-2	0.00551487	0.0255793	0.00600806	0.995931
PRE4g9-RPL3-NRg-2	-0.0697655	-0.937967	-0.0702471	0.367656
PRE4g9-ISD11-NRg-2	0.0198209	0.208689	0.0211461	0.44758
PRE4g9-HEM12-TRg-8	-0.000817549	-0.0554722	0.000635703	0.918375
PRE4g9-SEC10-TRg-1	0.0230299	0.249761	0.0220192	0.903716
PRE4g9-HTB1-TRg-7	-0.0407739	-0.566891	-0.0392744	0.360321
PRE4g9-TTI2-TRg-1	0.00863266	0.0654853	0.00958292	0.840209
PRE4g9-ACP1-TRg-2	-0.0467631	-0.643549	-0.0461319	0.45369
PRE4g9-ACP1-TRg-4	0.00243588	-0.0138301	0.00328611	0.978301
PRE4g9-GAL11-NRg-10	0.0257996	0.285212	0.0253725	0.477964
PRE4g9-UTP22-TRg-2	-0.0333939	-0.472431	-0.0322254	0.476948
PRE4g9-MST1-NRg-5	-0.088756	-1.18104	-0.0889496	0.575513
PRE4g9-RIB7-NRg-2	-0.00394389	-0.0954876	-0.00262197	0.90984
PRE4g9-MCD1-TRg-6	-0.0275778	-0.397989	-0.0269194	0.272988
PRE4g9-MCD1-TRg-5	-0.0623676	-0.843278	-0.0617435	0.438333
PRE4g9-GPI8-NRg-2	0.0393391	0.458511	0.0388866	0.84823
PRE4g9-THS1-TRg-2	0.0148705	0.145326	0.0159146	0.721414
PRE4g9-RRP7-TRg-2	-0.0282872	-0.407068	-0.0281964	0.564345
PRE4g9-RRP7-TRg-5	0.120306	1.49484	0.119752	0.350027
PRE4g9-SMX2-NRg-7	0.00842165	0.0627844	0.00979563	0.937425
PRE4g9-RRP45-TRg-5	-0.113889	-1.50272	-0.113154	0.327847
PRE4g9-RRP45-TRg-4	-0.10926	-1.44347	-0.109459	0.30645
PRE4g9-CNS1-TRg-2	-0.0149863	-0.236824	-0.0149249	0.769844
PRE4g9-FBP1-NRg-9	0.0133296	0.125604	0.0145595	0.856679
PRE4g9-GCD11-NRg-1	-0.0321748	-0.456827	-0.0320716	0.617045
PRE4g9-RPL10-TRg-2	0.0439127	0.51705	0.0451737	0.216367
PRE4g9-NUP192-TRg-4	NA	NA	NA	NA
PRE4g9-NUP145-NRg-4	-0.0597823	-0.810188	-0.0596819	0.600735
PRE4g9-HEM12-TRg-6	0.000154539	-0.04303	0.00167411	0.940315
PRE4g9-PLC1-TRg-3	-0.0357023	-0.501977	-0.0358772	0.594002
PRE4g9-RPA43-TRg-1	0.0471764	0.558824	0.0480925	0.682493
PRE4g9-RPB7-NRg-2	0.035352	0.407478	0.0355696	0.585746
PRE4g9-RPB7-NRg-3	-0.0124547	-0.204421	-0.013378	0.898611
PRE4g9-NSL1-NRg-1	-0.0241118	-0.353626	-0.0245806	0.655445
PRE4g9-UTP6-TRg-3	-0.00756691	-0.14186	-0.0071995	0.653206
PRE4g9-UTP6-TRg-1	0.011357	0.100356	0.0115109	0.912904
PRE4g9-YJU2-TRg-5	0.0301562	0.340974	0.0293871	0.693905
PRE4g9-FRS2-NRg-5	-0.00686259	-0.132845	-0.00702152	0.832252
PRE4g9-TIF35-NRg-2	0.064276	0.77769	0.0645485	0.55246
PRE4g9-GPI15-TRg-1	0.0102444	0.0861141	0.0112585	0.947218
PRE4g9-NOP1-NRg-5	-0.019247	-0.291359	-0.019264	0.498429
PRE4g9-GPI15-TRg-4	-0.0294226	-0.421601	-0.0282851	0.555129
PRE4g9-COG4-TRg-1	NA	NA	NA	NA
PRE4g9-TFA1-TRg-1	0.0311224	0.353342	0.0308317	0.87925
PRE4g9-RHO1-NRg-2	NA	NA	NA	NA
PRE4g9-RHO1-NRg-1	-0.00546464	-0.114952	-0.00482141	0.845309
PRE4g9-CDC55-NRg-2	-0.0482387	-0.662436	-0.046895	0.310835
PRE4g9-IDI1-NRg-7	-0.0476073	-0.654356	-0.0471496	0.123601
PRE4g9-RPL32-TRg-5	-0.152249	-1.99371	-0.151911	0.392648
PRE4g9-RPB5-TRg-4	0.101116	1.24922	0.101711	0.358447
PRE4g9-DIP2-TRg-5	0.0513135	0.611776	0.0517997	0.294814
PRE4g9-DIP2-TRg-1	0.0102123	0.0857041	0.0104534	0.943311
PRE4g9-RPC40-TRg-2	0.115345	1.43135	0.11587	0.211242
PRE4g9-CDC6-TRg-5	-0.0386113	-0.539211	-0.0373402	0.441063
PRE4g9-CDC6-TRg-3	-0.00977141	-0.170077	-0.00936953	0.907803
PRE4g9-DAD2-TRg-2	NA	NA	NA	NA
PRE4g9-RVS161-TRg-2	-0.0389551	-0.543612	-0.0390191	0.642817
PRE4g9-RVS161-TRg-1	-0.0589381	-0.799383	-0.0587291	0.518072
PRE4g9-SUP45-NRg-3	0.0670639	0.813372	0.0672413	0.20081
PRE4g9-SRB6-NRg-5	-0.0606439	-0.821216	-0.0605264	0.325223
PRE4g9-RPC11-TRg-4	0.0445191	0.524812	0.0446614	0.531109
PRE4g9-RKI1-TRg-8	0.032796	0.374763	0.0339286	0.557099
PRE4g9-NIP7-TRg-3	0.0326156	0.372454	0.0329469	0.324316
PRE4g9-RPL33A-NRg-12	0.0058975	0.0304767	0.00635715	0.992873
PRE4g9-SAM50-TRg-4	-0.0255006	-0.371401	-0.0242649	0.709984
PRE4g9-NOP4-NRg-1	0.0389191	0.453135	0.0397305	0.577032
PRE4g9-NOP4-NRg-3	-0.0580344	-0.787816	-0.0580099	0.236482
PRE4g9-SMX2-TRg-5	0.0145942	0.14179	0.0148254	0.911722
PRE4g9-POL12-NRg-2	0.00761662	0.0524805	0.00755895	0.985624
PRE4g9-BMS1-NRg-2	0.0167661	0.169589	0.0175466	0.88431
PRE4g9-RPA190-TRg-5	0.00817916	0.0596807	0.00879206	0.978243
PRE4g9-ALG14-NRg-4	0.0448695	0.529296	0.0453076	0.517407
PRE4g9-ALG14-NRg-1	0.00408975	0.00733847	0.00530844	0.984233
PRE4g9-PRE5-NRg-1	0.101545	1.25472	0.1015	0.306812
PRE4g9-BIG1-NRg-2	0.021646	0.232049	0.0218609	0.544458
PRE4g9-TFA2-TRg-4	0.0158608	0.158001	0.0153455	0.933338
PRE4g9-IMP4-TRg-6	0.0128443	0.119392	0.0139652	0.766711
PRE4g9-PAN1-NRg-1	NA	NA	NA	NA
PRE4g9-UTP13-TRg-2	0.00778391	0.0546217	0.00790157	0.97914
PRE4g9-KAE1-NRg-3	-0.00857776	-0.154798	-0.00734836	0.492413
PRE4g9-ERG20-TRg-1	0.0402347	0.469974	0.0406987	0.705207
PRE4g9-CDC20-TRg-6	-0.0868496	-1.15664	-0.087215	0.573396
PRE4g9-PWP2-NRg-2	0.0635857	0.768853	0.0648955	0.401633
PRE4g9-COG1-NRg-1	-0.0581278	-0.789011	-0.0582733	0.630094
PRE4g9-RPL1B-TRg-4	0.026335	0.292066	0.0268866	0.273812
PRE4g9-RPL1B-TRg-7	-0.010076	-0.173976	-0.00894635	0.48896
PRE4g9-UTP20-TRg-3	0.00484428	0.0169961	0.00524909	0.981129
PRE4g9-UTP20-TRg-4	0.057137	0.686314	0.0575529	0.560868
PRE4g9-RPL25-TRg-4	-0.0138448	-0.222214	-0.01343	0.490517
PRE4g9-RPL25-TRg-2	-0.0021982	-0.0731438	-0.00183967	0.884185
PRE4g9-MCM7-NRg-1	-0.0207331	-0.31038	-0.0199824	0.591221
PRE4g9-MRP49-TRg-5	-0.0291102	-0.417602	-0.0279179	0.506661
PRE4g9-ERO1-NRg-3	-0.076115	-1.01924	-0.075727	0.439022
PRE4g9-UTP5-TRg-7	0.00547744	0.0251002	0.00644383	0.990944
PRE4g9-MCM4-NRg-1	0.00931742	0.0742497	0.0086768	0.982097
PRE4g9-PRE3-NRg-1	-0.0121845	-0.200963	-0.0112789	0.246251
PRE4g9-FCF1-NRg-1	-6.90323e-05	-0.0458916	-0.000353336	0.886628
PRE4g9-CUS1-NRg-1	0.125121	1.55647	0.125335	0.255889
PRE4g9-PSF1-TRg-2	0.0173129	0.176587	0.018496	0.692205
PRE4g9-BCP1-TRg-2	-0.0524139	-0.715877	-0.0517542	0.434378
PRE4g9-PAN1-TRg-1	-0.0428711	-0.593734	-0.0431446	0.731219
PRE4g9-PAN1-TRg-3	-0.0267407	-0.387274	-0.027525	0.381104
PRE4g9-PAN1-TRg-4	0.00224662	-0.0162525	0.00123951	0.983088
PRE4g9-VPS3-TRg-2	-0.0315425	-0.448734	-0.0307244	0.478722
PRE4g9-YIL060W-NRg-1	0.0186121	0.193216	0.0185707	0.769302
PRE4g9-VPS53-NRg-1	NA	NA	NA	NA
PRE4g9-CYR1-TRg-4	0.129908	1.61775	0.129352	0.452466
PRE4g9-CYR1-TRg-7	0.0658161	0.797401	0.0642672	0.710601
PRE4g9-MPS1-NRg-1	0.0658562	0.797914	0.0646907	0.710814
PRE4g9-SRP1-TRg-5	NA	NA	NA	NA
PRE4g9-SRP1-TRg-4	NA	NA	NA	NA
PRE4g9-TAF12-TRg-2	NA	NA	NA	NA
PRE4g9-TAF12-TRg-3	NA	NA	NA	NA
PRE4g9-POP4-TRg-1	0.0247741	0.272087	0.0250136	0.685267
PRE4g9-SPT16-TRg-1	0.0588103	0.707731	0.0590879	0.308783
PRE4g9-NUP82-TRg-4	0.0751098	0.916356	0.075272	0.448298
PRE4g9-DML1-TRg-3	0.0468783	0.555008	0.047764	0.50839
PRE4g9-RPA43-NRg-3	0.0567582	0.681466	0.0569983	0.365427
PRE4g9-STU2-NRg-3	-0.0286742	-0.412022	-0.0282855	0.495496
PRE4g9-POP4-NRg-4	-0.0418386	-0.580519	-0.0411665	0.355109
PRE4g9-MCD1-TRg-2	-0.0407835	-0.567014	-0.0396572	0.624624
PRE4g9-RPS3-NRg-4	-0.0383751	-0.536188	-0.037808	0.561226
PRE4g9-PRP9-TRg-4	0.0664897	0.806023	0.0672875	0.354051
PRE4g9-RPP1-NRg-2	0.038765	0.451163	0.0393938	0.445807
PRE4g9-MTR2-NRg-11	-0.0654354	-0.882544	-0.0643674	0.256392
PRE4g9-GCD11-TRg-1	0.0735725	0.896679	0.0740743	0.30141
PRE4g9-RPF1-TRg-3	0.00151618	-0.0256017	0.00179165	0.967168
PRE4g9-SUB2-NRg-4	-0.119812	-1.57854	-0.119016	0.537257
PRE4g9-GPI15-TRg-3	0.0529915	0.633253	0.0526059	0.487466
PRE4g9-ERG9-TRg-6	-0.0136091	-0.219197	-0.0125962	0.578187
PRE4g9-RPT2-NRg-1	-0.0215488	-0.320821	-0.0215169	0.852074
PRE4g9-YOS1-NRg-3	-0.0423002	-0.586427	-0.0424832	0.522453
PRE4g9-SCM3-TRg-4	0.00746337	0.050519	0.00774512	0.973468
PRE4g9-SCM3-TRg-6	-0.000541362	-0.0519371	-0.000498777	0.919128
PRE4g9-RLP7-NRg-1	-0.000502646	-0.0514416	0.000506174	0.913075
PRE4g9-TFB2-NRg-4	0.0632188	0.764157	0.0622585	0.452668
PRE4g9-IMP4-TRg-1	0.0502381	0.598012	0.0513437	0.702223
PRE4g9-IMP4-TRg-3	0.0614549	0.741581	0.0628337	0.379035
PRE4g9-PRE4-TRg-3	0.0122079	0.111247	0.0128292	0.661635
PRE4g9-SUB2-TRg-3	-0.102834	-1.36123	-0.103346	0.5692
PRE4g9-RPP0-NRg-4	-0.035463	-0.498915	-0.0356029	0.824017
PRE4g9-RPP0-NRg-3	0.0216409	0.231983	0.0226315	0.863105
PRE4g9-TOM40-TRg-4	0.00502339	0.0192886	0.00558363	0.995559
PRE4g9-FUR1-NRg-12	0.0252382	0.278027	0.0269314	0.459453
PRE4g9-TOM40-TRg-2	-0.0208967	-0.312473	-0.020361	0.438252
PRE4g9-VMA11-NRg-4	-0.0199387	-0.300212	-0.0185299	0.637709
PRE4g9-PGS1-NRg-4	0.0334404	0.38301	0.0345151	0.484035
PRE4g9-URB1-TRg-4	0.00830579	0.0613015	0.00887369	0.930294
PRE4g9-ARP4-TRg-3	0.0220227	0.23687	0.0221729	0.796157
PRE4g9-RPT3-TRg-3	-0.0523217	-0.714697	-0.0521843	0.630954
PRE4g9-SUI3-TRg-3	0.0828554	1.0155	0.0831034	0.0412543
PRE4g9-RFC5-NRg-2	NA	NA	NA	NA
PRE4g9-RRP14-TRg-2	-0.0146274	-0.23223	-0.0151268	0.687846
PRE4g9-SCC2-TRg-1	NA	NA	NA	NA
PRE4g9-SSC1-TRg-3	-0.0478596	-0.657584	-0.0471988	0.525079
PRE4g9-RRP9-TRg-3	0.0133576	0.125961	0.0145964	0.84814
PRE4g9-MOT1-NRg-9	0.0143324	0.138439	0.0143336	0.92991
PRE4g9-RPL42A-NRg-2	0.00528544	0.0226428	0.00627539	0.988428
PRE4g9-SEC16-TRg-7	NA	NA	NA	NA
PRE4g9-IMP4-NRg-2	0.0494037	0.587332	0.0502347	0.373114
PRE4g9-YEF3-NRg-4	-0.0290403	-0.416708	-0.0287783	0.802142
PRE4g9-PUP1-TRg-1	0.00938951	0.0751725	0.00968611	0.955599
PRE4g9-UTP22-TRg-6	-0.0228986	-0.338097	-0.0217408	0.578507
PRE4g9-DBP2-NRg-4	0.0328085	0.374923	0.0332265	0.755828
PRE4g9-PRE2-TRg-7	-0.115519	-1.52359	-0.114285	0.300189
PRE4g9-ATP16-TRg-6	0.0208023	0.22125	0.0218809	0.4514
PRE4g9-UTP13-TRg-4	-0.0167049	-0.258822	-0.0168449	0.716872
PRE4g9-DOP1-NRg-4	NA	NA	NA	NA
PRE4g9-TIM44-TRg-3	-0.034306	-0.484106	-0.0334986	0.294033
PRE4g9-ATP16-TRg-2	-0.0404683	-0.562979	-0.039516	0.287746
PRE4g9-ENP1-NRg-3	-0.0292017	-0.418774	-0.0290731	0.627892
PRE4g9-NAF1-TRg-3	0.0203807	0.215853	0.0211631	0.755453
PRE4g9-COG4-TRg-2	-0.0587766	-0.797315	-0.05887	0.539169
PRE4g9-SOG2-TRg-7	-0.0248305	-0.362824	-0.0252187	0.757595
PRE4g9-YDR341C-TRg-3	0.038282	0.44498	0.0379441	0.549229
PRE4g9-YMR290W-A-TRg-10	0.0300234	0.339275	0.0312336	0.490055
PRE4g9-NUP192-NRg-9	0.0126309	0.116661	0.0129061	0.948756
PRE4g9-RPS31-NRg-8	-0.0223798	-0.331457	-0.0217286	0.697418
PRE4g9-SPC97-NRg-6	NA	NA	NA	NA
PRE4g9-EBP2-NRg-1	-0.0556601	-0.757426	-0.0556504	0.712807
PRE4g9-CDC48-TRg-5	0.0364199	0.421146	0.0357464	0.418698
PRE4g9-RPT1-TRg-4	0.00089768	-0.0335182	0.000453006	0.808764
PRE4g9-ULP1-NRg-2	-0.134083	-1.76119	-0.133085	0.209959
PRE4g9-RPN3-TRg-6	-0.0228949	-0.33805	-0.0239325	0.68635
PRE4g9-RPT1-TRg-5	0.0192353	0.201193	0.0187687	0.782888
PRE4g9-KRE5-TRg-2	-0.00121561	-0.0605672	-0.000629309	0.52223
PRE4g9-TBF1-NRg-8	-0.0442443	-0.61131	-0.0433225	0.321856
PRE4g9-UTP22-NRg-4	-0.0234876	-0.345637	-0.0223445	0.602245
PRE4g9-SSC1-NRg-4	-0.0241858	-0.354573	-0.0232466	0.444692
PRE4g9-REB1-TRg-4	NA	NA	NA	NA
PRE4g9-CDC48-NRg-9	-0.0799026	-1.06772	-0.0792391	0.370926
PRE4g9-FAS2-TRg-8	NA	NA	NA	NA
PRE4g9-TAO3-TRg-8	0.0225247	0.243296	0.0217442	0.909308
PRE4g9-CKS1-TRg-5	-0.0878062	-1.16888	-0.0879049	0.363539
PRE4g9-YLR379W-TRg-7	0.0411226	0.481338	0.0425979	0.684052
PRE4g9-TEN1-NRg-2	0.0804272	0.984416	0.0796399	0.357227
PRE4g9-RPL42A-TRg-2	0.0112075	0.0984412	0.01203	0.84764
PRE4g9-SEC27-TRg-4	NA	NA	NA	NA
PRE4g9-TBF1-NRg-4	-0.0382824	-0.535001	-0.0380565	0.455741
PRE4g9-RPT1-NRg-6	NA	NA	NA	NA
PRE4g9-COG1-TRg-3	NA	NA	NA	NA
PRE4g9-SUI1-TRg-6	0.0386153	0.449246	0.0397154	0.299005
PRE4g9-TIM23-TRg-6	-0.0984612	-1.30526	-0.0972762	0.252896
PRE4g9-CDC48-NRg-6	0.0544735	0.652223	0.0545744	0.4823
PRE4g9-EPL1-TRg-5	0.0836704	1.02593	0.0834856	0.554843
PRE4g9-RPT5-TRg-8	-0.0754346	-1.01053	-0.0758215	0.407219
PRE4g9-ATP16-NRg-4	-0.00959554	-0.167826	-0.00865141	0.765476
PRE4g9-RPN6-TRg-3	0.0573511	0.689054	0.0568015	0.481621
PRE4g9-ERG9-NRg-6	-0.196463	-2.55963	-0.196489	0.317723
PRE4g9-SMX3-TRg-1	0.0411323	0.481462	0.0406192	0.823786
PRE4g9-NCB2-NRg-3	0.0113767	0.100608	0.0122215	0.860052
PRE4g9-SEC16-NRg-12	NA	NA	NA	NA
PRE4g9-RPN6-TRg-2	0.0657281	0.796274	0.0658104	0.613885
PRE4g9-REB1-NRg-4	0.0104375	0.0885861	0.0102546	0.975378
PRE4g9-ATP16-TRg-9	-0.0594773	-0.806284	-0.0584689	0.46219
PRE4g9-ERG9-NRg-7	-0.1093	-1.44398	-0.109251	0.306565
PRE4g3-RPL15A-NRg-4	-0.0557797	-0.758957	-0.0504886	0.360578
PRE4g3-RPL15A-NRg-5	-0.0702393	-0.944032	-0.0669105	0.199403
PRE4g3-KRE33-TRg-1	0.0400531	0.467649	0.0400381	0.365435
PRE4g3-PMI40-NRg-1	-0.00725182	-0.137827	-0.00802976	0.76199
PRE4g3-NOP19-NRg-3	-0.0391	-0.545467	-0.0405091	0.418798
PRE4g3-SRP14-NRg-4	0.050344	0.599367	0.0526724	0.193074
PRE4g3-SEC27-TRg-2	0.00950343	0.0766307	0.0198147	0.541743
PRE4g3-GPI14-TRg-3	0.0139864	0.13401	0.0120586	0.916851
PRE4g3-PAH1-TRg-7	0.180271	2.26236	0.186005	0.170054
PRE4g3-PAH1-TRg-6	0.176028	2.20806	0.1814	0.239657
PRE4g3-PAH1-TRg-5	0.19004	2.3874	0.194345	0.214809
PRE4g3-PAH1-TRg-3	0.17923	2.24903	0.182668	0.247284
PRE4g3-COG3-TRg-1	0.105152	1.30088	0.107787	0.231487
PRE4g3-HTS1-NRg-5	0.107866	1.33561	0.107044	0.216367
PRE4g3-MSN5-TRg-7	NA	NA	NA	NA
PRE4g3-ERG26-TRg-1	-0.0348814	-0.49147	-0.0334364	0.679732
PRE4g3-SMD2-TRg-5	0.0524637	0.626498	0.0493548	0.472728
PRE4g3-SMD2-TRg-4	0.0391951	0.456667	0.0357683	0.382704
PRE4g3-SMD2-TRg-1	0.0578654	0.695637	0.0570764	0.200667
PRE4g3-PRE7-TRg-4	0.0472246	0.55944	0.0525183	0.45235
PRE4g3-PRE7-TRg-7	0.0577647	0.694348	0.0580088	0.209756
PRE4g3-SEC6-TRg-3	-0.00979094	-0.170327	-0.00650367	0.854679
PRE4g3-ESF2-NRg-1	-0.0116592	-0.19424	-0.0115138	0.620515
PRE4g3-ESF2-NRg-3	-0.00929328	-0.163957	-0.00753149	0.733157
PRE4g3-AFG2-TRg-2	0.0768906	0.939149	0.0768255	0.293977
PRE4g3-RRP36-TRg-3	-0.00922992	-0.163146	-0.00629378	0.699205
PRE4g3-RRP36-TRg-5	0.0139281	0.133264	0.014504	0.711961
PRE4g3-GCR1-NRg-2	-0.0148921	-0.235618	-0.0154524	0.543037
PRE4g3-PRE4-NRg-4	0.0170271	0.17293	0.0226994	0.758332
PRE4g3-PRE4-NRg-9	0.0358979	0.414465	0.0353913	0.598058
PRE4g3-DSN1-NRg-2	0.0163388	0.16412	0.0148211	0.72273
PRE4g3-GPI11-TRg-3	-0.0938159	-1.2458	-0.0924373	0.258838
PRE4g3-POP3-TRg-1	0.0473759	0.561378	0.0460142	0.169008
PRE4g3-MNE1-TRg-5	NA	NA	NA	NA
PRE4g3-RRP12-NRg-1	0.0143208	0.13829	0.0142379	0.361715
PRE4g3-RSC6-TRg-2	0.146317	1.82776	0.148829	0.140496
PRE4g3-CDC25-TRg-1	-0.0867479	-1.15533	-0.0815127	0.288739
PRE4g3-CDC25-TRg-9	NA	NA	NA	NA
PRE4g3-YPP1-NRg-3	0.0568947	0.683213	0.0609095	0.257089
PRE4g3-NFS1-NRg-9	-0.0230604	-0.340168	-0.0216493	0.247023
PRE4g3-NFS1-NRg-8	-0.0230774	-0.340386	-0.0226326	0.572328
PRE4g3-UBA2-TRg-1	-0.0145151	-0.230794	-0.0142471	0.487255
PRE4g3-ARP2-NRg-3	-0.0397316	-0.553551	-0.0348364	0.539809
PRE4g3-MAK16-TRg-1	0.0348187	0.400652	0.0384204	0.63157
PRE4g3-CEP3-NRg-1	0.0480007	0.569374	0.053655	0.234128
PRE4g3-GUK1-TRg-5	0.0768392	0.938492	0.0755598	0.32636
PRE4g3-GUK1-TRg-2	0.0833326	1.0216	0.0856705	0.297796
PRE4g3-GPI12-NRg-6	-0.12918	-1.69843	-0.125573	0.205422
PRE4g3-RPS5-NRg-5	-0.0689261	-0.927223	-0.0676487	0.263762
PRE4g3-RPS5-NRg-2	-0.0641093	-0.865571	-0.0635596	0.117564
PRE4g3-RPC19-NRg-1	0.115705	1.43595	0.118517	0.228204
PRE4g3-TIM54-TRg-1	0.0281915	0.315828	0.0274777	0.59743
PRE4g3-TEN1-TRg-2	0.12473	1.55147	0.129666	0.230197
PRE4g3-SAH1-NRg-4	0.00313374	-0.00489791	0.00504447	0.967298
PRE4g3-SAH1-NRg-5	-0.0467366	-0.643211	-0.044123	0.358379
PRE4g3-SAH1-NRg-3	0.0418171	0.490227	0.0433074	0.653756
PRE4g3-ATP15-NRg-5	0.0303075	0.342911	0.0344773	0.676351
PRE4g3-SCD5-TRg-5	-0.114814	-1.51457	-0.10798	0.379927
PRE4g3-ARB1-NRg-2	-0.0325026	-0.461023	-0.0318477	0.50678
PRE4g3-ARB1-NRg-4	0.0532461	0.636512	0.0518371	0.327847
PRE4g3-PUP2-TRg-1	0.00618015	0.0340945	0.00831776	0.959696
PRE4g3-CCT8-TRg-2	NA	NA	NA	NA
PRE4g3-MCM4-TRg-1	-0.0171737	-0.264822	-0.011589	0.712807
PRE4g3-LSM4-TRg-1	-0.0732779	-0.982925	-0.0758733	0.246752
PRE4g3-NOP53-NRg-1	-0.13358	-1.75476	-0.129683	0.271305
PRE4g3-ATP3-TRg-4	0.0872936	1.0723	0.0877373	0.269347
PRE4g3-AFG2-NRg-3	0.0245677	0.269445	0.0216627	0.544458
PRE4g3-PRO3-NRg-3	0.0244133	0.267469	0.0221032	0.816358
PRE4g3-NRD1-NRg-10	0.125028	1.55528	0.12933	0.210457
PRE4g3-SEC61-TRg-2	-0.0253531	-0.369514	-0.0266923	0.355086
PRE4g3-RHO3-TRg-4	0.0483073	0.573299	0.0464241	0.266008
PRE4g3-SNF2-TRg-6	-0.13445	-1.76589	-0.138555	0.294279
PRE4g3-SMD2-NRg-3	0.0117216	0.105022	0.0113961	0.684624
PRE4g3-RSC4-TRg-2	0.102702	1.26952	0.102599	0.209959
PRE4g3-RSC4-TRg-1	0.173479	2.17543	0.176728	0.191687
PRE4g3-TIF34-TRg-2	-0.0124828	-0.204781	-0.00483279	0.825167
PRE4g3-BET1-NRg-1	0.102487	1.26677	0.109821	0.158556
PRE4g3-CDC8-NRg-2	0.036021	0.416041	0.0340251	0.35354
PRE4g3-PRP42-TRg-2	0.063653	0.769715	0.0640979	0.20081
PRE4g3-RRB1-TRg-2	0.027149	0.302484	0.0261271	0.697909
PRE4g3-SPC24-TRg-1	0.0105832	0.0904511	0.0134247	0.888589
PRE4g3-ILS1-NRg-1	0.0646673	0.782698	0.0648768	0.353763
PRE4g3-GFA1-TRg-2	-0.0014557	-0.0636402	0.00139232	0.953866
PRE4g3-SEC21-NRg-10	0.0853863	1.04789	0.0886811	0.327941
PRE4g3-RPC10-NRg-1	0.136034	1.69615	0.140319	0.185324
PRE4g3-RPB10-TRg-3	0.0465423	0.550707	0.0501887	0.39581
PRE4g3-RPB10-TRg-2	0.111346	1.38016	0.112682	0.24559
PRE4g3-YNL181W-TRg-1	-0.0478048	-0.656883	-0.0467688	0.372585
PRE4g3-RAD3-NRg-1	-0.0201787	-0.303284	-0.0226557	0.51727
PRE4g3-NOP10-TRg-1	0.0422278	0.495484	0.0441072	0.254419
PRE4g3-BFR2-TRg-3	0.0115653	0.103022	0.0123503	0.775178
PRE4g3-MCM2-TRg-6	-0.0455568	-0.628109	-0.0483792	0.36476
PRE4g3-MCM2-TRg-4	-0.0342385	-0.483241	-0.0361274	0.43321
PRE4g3-MPP10-TRg-1	0.00298403	-0.0068141	0.00570425	0.999993
PRE4g3-RET2-TRg-4	0.141867	1.77082	0.145857	0.253056
PRE4g3-RET2-TRg-1	0.183617	2.30519	0.188794	0.183952
PRE4g3-RPS2-NRg-1	-0.152058	-1.99126	-0.148686	0.196712
PRE4g3-RPS2-NRg-2	-0.0982576	-1.30265	-0.093913	0.436478
PRE4g3-ORC4-NRg-3	-0.00788873	-0.145979	-0.00924855	0.360824
PRE4g3-TIP20-TRg-7	-0.03752	-0.525243	-0.0386019	0.299279
PRE4g3-SMT3-TRg-1	-0.0161202	-0.251337	-0.0146833	0.731913
PRE4g3-MSS18-NRg-6	-0.108059	-1.42811	-0.110058	0.365435
PRE4g3-YEF3-NRg-9	0.042733	0.501951	0.0507722	0.494444
PRE4g3-ASK1-NRg-1	0.00151478	-0.0256196	0.000831619	0.724983
PRE4g3-SMC1-TRg-1	-0.108904	-1.43892	-0.102303	0.260127
PRE4g3-NIP1-NRg-1	-0.0259784	-0.377517	-0.0266368	0.0778656
PRE4g3-RPP1-NRg-1	-0.0228354	-0.337289	-0.0216709	0.855782
PRE4g3-YDJ1-TRg-6	-0.132498	-1.74091	-0.129543	0.321422
PRE4g3-SUB2-NRg-1	0.0533565	0.637926	0.0526884	0.373114
PRE4g3-TIM10-NRg-8	0.0292009	0.328748	0.0283849	5.80543e-12
PRE4g3-TIM10-NRg-4	0.0199189	0.209942	0.0190721	0.814845
PRE4g3-TIM10-NRg-7	-0.0110116	-0.18595	-0.0118109	0.18545
PRE4g3-SKI6-TRg-4	0.00651373	0.0383641	0.00638369	0.963993
PRE4g3-TUB4-TRg-1	-0.0664234	-0.895191	-0.0671457	0.211026
PRE4g3-CDC37-NRg-2	0.00530494	0.0228923	0.00700255	0.990217
PRE4g3-ISD11-TRg-3	-0.0460321	-0.634193	-0.0447419	0.744736
PRE4g3-YOS1-TRg-4	-0.00104275	-0.0583546	-0.00182193	0.765842
PRE4g3-SSC1-TRg-6	-0.0145033	-0.230643	-0.0122094	0.612653
PRE4g3-MTR3-TRg-5	0.000542362	-0.0380661	0.000971929	0.838252
PRE4g3-MTR3-TRg-6	-0.004705	-0.105229	-0.00728851	0.550066
PRE4g3-TFA1-TRg-2	0.0379896	0.441238	0.0399707	0.31056
PRE4g3-CDC3-NRg-3	-0.268955	-3.48748	-0.26978	0.291044
PRE4g3-ERG25-TA-18	0.010552	0.0900519	0.0123794	0.936502
PRE4g3-RPB11-TRg-4	0.102577	1.26791	0.101663	0.291822
PRE4g3-RPB11-TRg-1	0.0591766	0.71242	0.0666037	0.368939
PRE4g3-RPB11-TRg-2	0.0437995	0.515602	0.047917	0.55789
PRE4g3-DED1-TRg-3	0.0289578	0.325636	0.0287431	0.472238
PRE4g3-DED1-TRg-1	0.0227835	0.246608	0.020494	0.707255
PRE4g3-DED1-TRg-6	-0.00301913	-0.0836512	-0.00210319	0.899516
PRE4g3-DED1-TRg-4	0.00503303	0.019412	0.00493298	0.983859
PRE4g3-RPL10-NRg-5	-0.0367165	-0.514959	-0.0372643	0.326441
PRE4g3-RPL10-NRg-4	-0.0143656	-0.22888	-0.015384	0.0271904
PRE4g3-EFB1-NRg-1	0.073787	0.899424	0.0749213	0.180326
PRE4g3-EFB1-NRg-5	0.0347646	0.39996	0.035252	0.704437
PRE4g3-EFB1-NRg-4	0.0711975	0.866281	0.0738263	0.274506
PRE4g3-RPT3-NRg-1	-0.0779762	-1.04306	-0.0751501	0.209552
PRE4g3-SAC6-TRg-8	-0.266243	-3.45278	-0.267813	0.189842
PRE4g3-SAC6-TRg-4	-0.272011	-3.5266	-0.274283	0.0787155
PRE4g3-SAC6-TRg-5	-0.241228	-3.1326	-0.241927	0.0382085
PRE4g3-SAC6-TRg-3	-0.226571	-2.94499	-0.228877	0.154813
PRE4g3-DIM1-TRg-5	-0.042142	-0.584403	-0.0416024	0.395764
PRE4g3-DIM1-TRg-7	-0.0811555	-1.08375	-0.0824082	0.203138
PRE4g3-RPC17-NRg-1	0.104026	1.28647	0.105103	0.214337
PRE4g3-RPC17-NRg-2	0.14818	1.85161	0.151099	0.220365
PRE4g3-YDR341C-TRg-1	0.04631	0.547734	0.0508545	0.653756
PRE4g3-RAP1-NRg-8	-0.0517773	-0.707729	-0.056405	0.226048
PRE4g3-RAP1-NRg-5	-0.123677	-1.62801	-0.117753	0.188148
PRE4g3-RAP1-NRg-2	-0.039643	-0.552416	-0.0405219	0.480049
PRE4g3-SEC26-NRg-3	0.0880544	1.08204	0.0872517	0.280354
PRE4g3-SPP41-TRg-3	-0.105152	-1.39089	-0.100615	0.294143
PRE4g3-TAP42-NRg-1	0.0932858	1.149	0.0940714	0.337464
PRE4g3-PGA2-TRg-6	0.0483797	0.574225	0.0482386	0.455472
PRE4g3-BRL1-TRg-1	0.0113856	0.100722	0.0183069	0.904637
PRE4g3-FOL2-TRg-1	0.0475967	0.564203	0.0451508	0.432172
PRE4g3-NAB3-NRg-5	0.0729754	0.889037	0.0707337	0.290142
PRE4g3-SNF4-TRg-4	0.117519	1.45917	0.11971	0.223256
PRE4g3-HRR25-TRg-2	-0.104369	-1.38087	-0.0992369	0.400665
PRE4g3-TRS23-TRg-4	0.133398	1.66242	0.138998	0.225312
PRE4g3-CTR86-TRg-4	-0.0245802	-0.359621	-0.0246237	0.570773
PRE4g3-RPB5-TRg-5	-0.0941619	-1.25023	-0.0873564	0.499202
PRE4g3-SPN1-NRg-2	-0.00943332	-0.165749	-0.0040474	0.904853
PRE4g3-SPN1-NRg-1	-0.0439656	-0.607743	-0.0381577	0.528818
PRE4g3-SEC61-NRg-1	-0.0705431	-0.94792	-0.0693123	0.391767
PRE4g3-SEC61-NRg-7	-0.176338	-2.30204	-0.177064	0.193074
PRE4g3-TUS1-TRg-3	0.0683039	0.829244	0.0673118	0.209959
PRE4g3-OLE1-NRg-2	-0.125047	-1.64555	-0.124422	0.234413
PRE4g3-AFG2-TRg-1	0.137181	1.71083	0.140663	0.261973
PRE4g3-TOA2-NRg-1	0.22536	2.83948	0.230411	0.216367
PRE4g3-USO1-TRg-1	0.0970427	1.19708	0.103416	0.149414
PRE4g3-UTP22-NRg-2	0.00358182	0.000837346	0.00477054	0.985885
PRE4g3-RIB1-TRg-3	-0.0392119	-0.546898	-0.0365594	0.426996
PRE4g3-RIB1-TRg-7	-0.0421707	-0.58477	-0.0383501	0.251864
PRE4g3-RIB1-TRg-4	-0.0336408	-0.475592	-0.0301181	0.486637
PRE4g3-COG1-TRg-1	0.121946	1.51583	0.126559	0.21751
PRE4g3-RPL32-NRg-2	-0.0719386	-0.965782	-0.070523	0.514186
PRE4g3-GLC7-NRg-3	0.0241593	0.264218	0.0227974	0.572494
PRE4g3-GLC7-NRg-4	0.121924	1.51555	0.12283	0.341951
PRE4g3-HSF1-TRg-2	0.0407732	0.476866	0.0418541	0.49123
PRE4g3-DAM1-NRg-5	0.00397775	0.00590498	0.00338412	0.948337
PRE4g3-SEC18-TRg-4	0.0851651	1.04506	0.087669	0.307301
PRE4g3-SEC18-TRg-5	0.095822	1.18146	0.0979656	0.221452
PRE4g3-PAB1-NRg-3	0.0726083	0.884338	0.0744827	0.263485
PRE4g3-POP8-TRg-2	0.00615155	0.0337284	0.0061371	0.993925
PRE4g3-PAB1-NRg-4	0.0412188	0.482569	0.0437173	0.505082
PRE4g3-BIG1-TRg-4	-0.0235461	-0.346385	-0.0191288	0.793091
PRE4g3-BIG1-TRg-5	-0.0402473	-0.560151	-0.0367078	0.515534
PRE4g3-BIG1-TRg-6	-0.105018	-1.38918	-0.103455	0.331522
PRE4g3-RPO41-NRg-1	0.0305005	0.345382	0.0305741	0.693199
PRE4g3-RVB2-NRg-2	-0.128341	-1.6877	-0.12981	0.162603
PRE4g3-PET117-NRg-8	0.182696	2.29339	0.186551	0.214783
PRE4g3-VPS45-NRg-9	0.139763	1.74388	0.139095	0.29055
PRE4g3-YCG1-NRg-1	-0.0365143	-0.512371	-0.032924	0.318206
PRE4g3-NOC4-NRg-1	-0.0062087	-0.124476	-0.00665165	0.55115
PRE4g3-NMD3-NRg-2	0.0179181	0.184334	0.0159279	0.816537
PRE4g3-DRS1-TRg-2	0.0792845	0.96979	0.0795587	0.292299
PRE4g3-HTB1-NRg-2	-0.0765216	-1.02444	-0.0768813	0.285054
PRE4g3-IPI1-TRg-2	0.07509	0.916102	0.0789508	0.272776
PRE4g3-SEC18-NRg-1	-0.0317484	-0.45137	-0.0228099	0.700688
PRE4g3-SEC18-NRg-2	0.0315312	0.358574	0.0295949	0.542053
PRE4g3-JIP5-NRg-2	0.0471279	0.558203	0.0445654	0.396181
PRE4g3-YPT1-TRg-3	0.124456	1.54796	0.130276	0.330977
PRE4g3-YPT1-TRg-2	0.00897203	0.069829	0.0173057	0.938584
PRE4g3-CLF1-NRg-2	-0.0676146	-0.910437	-0.0656026	0.193001
PRE4g3-SNF2-NRg-7	-0.0152718	-0.240479	-0.0175155	0.712807
PRE4g3-SNF2-NRg-4	-0.130784	-1.71897	-0.13585	0.211242
PRE4g3-RPL25-NRg-1	-0.106338	-1.40608	-0.10175	0.300189
PRE4g3-NOP56-TRg-1	0.0637993	0.771587	0.0610039	0.22003
PRE4g3-NOP56-TRg-2	0.069692	0.847011	0.0680059	0.351504
PRE4g3-TRS31-TRg-1	0.0152205	0.149806	0.0223454	0.817043
PRE4g3-DBF4-TRg-2	-0.00488389	-0.107519	0.000480235	0.965097
PRE4g3-DBF4-TRg-1	-0.000302611	-0.0488812	0.00198622	0.833298
PRE4g3-RPC19-TRg-4	0.104431	1.29165	0.105901	0.263535
PRE4g3-RPC19-TRg-6	0.112793	1.39867	0.115128	0.295743
PRE4g3-RPC19-TRg-3	0.051257	0.611053	0.0543984	0.302015
PRE4g3-ROK1-NRg-1	0.0163052	0.163689	0.0168901	0.730125
PRE4g3-CDC33-TRg-4	-0.0232227	-0.342246	-0.025529	0.505786
PRE4g3-DHR2-TRg-3	-0.0170034	-0.262641	-0.0164639	0.493764
PRE4g3-RRP42-NRg-5	-0.0244606	-0.35809	-0.0259689	0.460432
PRE4g3-CLF1-TRg-1	0.113963	1.41366	0.117647	0.264677
PRE4g3-ERG11-NA-16	-0.086976	-1.15825	-0.0876207	0.283015
PRE4g3-VAS1-NRg-4	0.0614257	0.741207	0.0662802	0.415578
PRE4g3-PIK1-NRg-2	0.02714	0.302369	0.0278779	0.560534
PRE4g3-SAR1-NRg-7	-0.207984	-2.70708	-0.207256	0.26712
PRE4g3-SAR1-NRg-4	-0.0698087	-0.93852	-0.0645111	0.406947
PRE4g3-RPS3-TRg-1	-0.134091	-1.7613	-0.130502	0.343734
PRE4g3-YTM1-TRg-2	0.0252686	0.278416	0.0262307	0.769844
PRE4g3-SUI3-NRg-5	0.000151317	-0.0430712	-0.000723112	0.901956
PRE4g3-SUI3-NRg-2	0.0295595	0.333338	0.0268913	0.381006
PRE4g3-RRP7-TRg-4	0.0225526	0.243653	0.0211511	0.343071
PRE4g3-RRP7-TRg-6	0.00325004	-0.00340931	0.0062804	0.988779
PRE4g3-NIP7-TRg-2	0.0534737	0.639426	0.0543991	0.453994
PRE4g3-MDM35-TRg-1	-0.020275	-0.304516	-0.0206641	0.48069
PRE4g3-ALA1-NRg-1	0.0185695	0.192671	0.0179035	0.707374
PRE4g3-DOA4-NRg-2	-0.161955	-2.11794	-0.162839	0.176574
PRE4g3-RPS13-NRg-1	-0.0837025	-1.11635	-0.077919	0.58263
PRE4g3-YSF3-TRg-2	0.00492407	0.0180173	0.00400929	0.969746
PRE4g3-RPS2-NRg-11	-0.146899	-1.92523	-0.143975	0.318122
PRE4g3-SSL1-TRg-10	0.0250891	0.276118	0.0262564	0.595384
PRE4g3-NIP7-TRg-1	0.0874901	1.07482	0.0869098	0.302236
PRE4g3-LST8-NRg-1	-0.246068	-3.19454	-0.239451	0.319219
PRE4g3-TAF4-TRg-3	-0.0680995	-0.916643	-0.0596865	0.335475
PRE4g3-HAS1-TRg-2	0.038029	0.441742	0.0427019	0.74686
PRE4g3-GLC7-TRg-2	NA	NA	NA	NA
PRE4g3-CDC45-NRg-1	-0.0500173	-0.685202	-0.0467235	0.376771
PRE4g3-SEC22-NRg-8	0.162242	2.03159	0.16753	0.211242
PRE4g3-YOS1-TRg-2	0.0132372	0.124421	0.0183345	0.709697
PRE4g3-RBA50-TRg-3	-0.0139946	-0.224131	-0.0163374	0.716836
PRE4g3-SPP41-NRg-2	-0.0563392	-0.766119	-0.0546345	0.184068
PRE4g3-PRP46-TRg-2	0.00786123	0.0556113	0.00668951	0.977661
PRE4g3-PGA2-NRg-1	0.0398553	0.465118	0.0395567	0.388115
PRE4g3-CBF5-TRg-3	0.0839422	1.02941	0.0827046	0.277735
PRE4g3-TCP1-NRg-3	0.0386534	0.449734	0.0398373	0.443399
PRE4g3-TCP1-NRg-2	0.112542	1.39547	0.116551	0.183952
PRE4g3-ERG26-NRg-2	-0.0388169	-0.541843	-0.0355249	0.381104
PRE4g3-ERG26-NRg-4	-0.0367065	-0.514831	-0.0346051	0.212317
PRE4g3-MES1-TRg-5	0.0397512	0.463785	0.0387583	0.354683
PRE4g3-HTS1-TRg-2	0.0854725	1.04899	0.0860775	0.123601
PRE4g3-SSS1-TRg-3	-0.131958	-1.73399	-0.128759	0.237838
PRE4g3-SSS1-TRg-2	-0.132205	-1.73715	-0.127761	0.285054
PRE4g3-SYS1-TRg-7	0.0801528	0.980904	0.0812323	0.214783
PRE4g3-SYS1-TRg-2	0.0780207	0.953614	0.0822744	0.500003
PRE4g3-SYS1-TRg-1	0.0466692	0.552332	0.0509397	0.569241
PRE4g3-BFR2-TRg-1	0.0133446	0.125795	0.0137932	0.911917
PRE4g3-EOS1-TRg-3	-0.150864	-1.97598	-0.149967	0.246933
PRE4g3-TAF4-NRg-1	-0.0126707	-0.207185	-0.00640909	0.76058
PRE4g3-ARL3-NRg-8	0.0213942	0.228826	0.0235506	0.773558
PRE4g3-RPN5-NRg-1	0.0399871	0.466804	0.0404565	0.343071
PRE4g3-TIM9-NRg-2	0.0703139	0.854971	0.0701177	0.302913
PRE4g3-NUP57-NRg-3	0.0182884	0.189073	0.0218337	0.585278
PRE4g3-VPS4-TRg-1	-0.100467	-1.33093	-0.098426	0.306098
PRE4g3-CDC3-TRg-4	-0.257867	-3.34556	-0.258002	0.27136
PRE4g3-BBP1-NRg-1	-0.0662652	-0.893166	-0.0662291	0.289786
PRE4g3-BBP1-NRg-2	-0.172462	-2.25242	-0.170133	0.297356
PRE4g3-USE1-NRg-3	-0.0931461	-1.23723	-0.0911645	0.187861
PRE4g3-CCT7-TRg-1	0.0418381	0.490496	0.0394834	0.246251
PRE4g3-SAH1-TRg-3	-0.0403076	-0.560923	-0.0407166	0.424368
PRE4g3-CHS2-TRg-1	-0.0150788	-0.238008	-0.0163156	0.692592
PRE4g3-DPM1-TRg-2	-0.036988	-0.518434	-0.0388263	0.464004
PRE4g3-BBP1-TRg-1	-0.0602396	-0.816042	-0.0525323	0.413436
PRE4g3-NRD1-TRg-4	0.180546	2.26588	0.182109	0.123601
PRE4g3-RPB3-NRg-1	0.0114757	0.101874	0.0172979	0.449864
PRE4g3-PHO85-NRg-6	-0.0137979	-0.221613	-0.012748	0.501284
PRE4g3-SNF6-TRg-6	-0.206034	-2.68213	-0.206543	0.2306
PRE4g3-PRP38-NRg-2	0.0886858	1.09012	0.0909361	0.217399
PRE4g3-OAR1-NRg-3	0.0742091	0.904827	0.073379	0.214337
PRE4g3-ROX3-NRg-1	-0.00984864	-0.171065	-0.0120493	0.636002
PRE4g3-YPP1-TRg-6	0.0411185	0.481286	0.04482	0.62138
PRE4g3-CBF2-NRg-8	0.0233891	0.25436	0.0206577	0.468274
PRE4g3-SPT6-TRg-5	-0.259438	-3.36567	-0.257647	0.246824
PRE4g3-SEC10-NRg-1	-0.0639611	-0.863674	-0.0569545	0.18159
PRE4g3-NSL1-NRg-3	0.135096	1.68415	0.143434	0.198166
PRE4g3-NRD1-NRg-8	0.20406	2.56685	0.204774	0.097798
PRE4g3-RPB3-TRg-1	0.0434456	0.511071	0.0471385	0.33902
PRE4g3-NRD1-NRg-4	0.0991172	1.22364	0.100093	0.358495
PRE4g3-RVB1-TRg-2	-0.0579857	-0.787192	-0.0520558	0.636838
PRE4g3-TIF5-NRg-8	0.336607	4.26337	0.339038	0.174917
PRE4g3-EOS1-NRg-1	-0.130378	-1.71377	-0.127687	0.297345
PRE4g3-ERG25-NA-26	0.0715784	0.871156	0.0704182	0.212317
PRE4g3-MSL5-NRg-4	-0.0225829	-0.334056	-0.0256708	0.43542
PRE4g3-SEC24-TRg-2	0.0227769	0.246524	0.0301584	0.571792
PRE4g3-RPL30-NRg-5	-0.0802921	-1.0727	-0.076165	0.328744
PRE4g3-SNU71-NRg-3	0.0534983	0.639741	0.0521513	0.332544
PRE4g3-CDC33-NRg-1	-0.0482717	-0.662859	-0.0475588	0.422995
PRE4g3-RPN6-TRg-4	0.0558536	0.669887	0.0566541	0.0917593
PRE4g3-NAB2-TRg-4	0.0471047	0.557906	0.050296	0.332295
PRE4g3-NAB2-TRg-6	0.125025	1.55524	0.125	0.208899
PRE4g3-YTM1-NRg-1	0.0747263	0.911447	0.0751674	0.145438
PRE4g3-OLE1-TRg-8	-0.13043	-1.71445	-0.131498	0.244835
PRE4g3-OLE1-TRg-1	-0.0344488	-0.485934	-0.0351562	0.553422
PRE4g3-UTP7-TRg-4	-0.0489852	-0.671991	-0.0485987	0.412233
PRE4g3-ACT1-NRg-6	-0.215648	-2.80519	-0.212696	0.202782
PRE4g3-RPL18A-NRg-3	-0.0801522	-1.07091	-0.0773512	0.306833
PRE4g3-BRX1-NRg-1	0.0232873	0.253057	0.0243084	0.53651
PRE4g3-NAF1-TRg-8	0.0542592	0.64948	0.0545096	0.390781
PRE4g3-NAF1-TRg-6	0.0300251	0.339297	0.0308459	0.575562
PRE4g3-NAF1-TRg-4	0.0507343	0.604363	0.051379	0.613531
PRE4g3-CDC8-TRg-2	0.083321	1.02145	0.0835393	0.253056
PRE4g3-NSE4-TRg-1	0.00475168	0.0158108	0.00747562	0.928246
PRE4g3-PAB1-NRg-2	0.0188193	0.195868	0.0230027	0.501004
PRE4g3-PRP43-TRg-4	-0.0672878	-0.906254	-0.0616457	0.346406
PRE4g3-SEC2-NRg-3	-0.0148168	-0.234654	-0.0144976	0.688917
PRE4g3-SEC2-NRg-6	0.00608335	0.0328555	0.00526449	0.991924
PRE4g3-MPP10-NRg-5	0.00057702	-0.0376225	0.000555451	0.898118
PRE4g3-YDR355C-TRg-2	0.0134107	0.126641	0.0169486	0.571167
PRE4g3-YLR339C-TRg-9	-0.068461	-0.92127	-0.0654905	0.462316
PRE4g3-SNM1-TRg-2	0.0728565	0.887514	0.0750072	0.217399
PRE4g3-ALR1-NRg-4	-0.0636525	-0.859724	-0.0611919	0.443998
PRE4g3-ALR1-NRg-1	-0.0239356	-0.351371	-0.0216734	0.621676
PRE4g3-ALR1-NRg-3	-0.0891179	-1.18567	-0.0872501	0.405692
PRE4g3-RPL10-TRg-1	0.00204886	-0.0187838	0.00152906	0.92236
PRE4g3-RPL28-TRg-2	-0.0974494	-1.29231	-0.0967957	0.286244
PRE4g3-UTP25-TRg-1	0.0133789	0.126235	0.0131455	0.707422
PRE4g3-POB3-TRg-1	0.00102604	-0.0318753	0.00454393	0.990206
PRE4g3-POB3-TRg-3	-0.0278091	-0.400949	-0.0217719	0.609618
PRE4g3-POB3-TRg-2	0.0588773	0.708588	0.0607102	0.513272
PRE4g3-MED11-TRg-1	0.0657035	0.795961	0.0699905	0.541748
PRE4g3-ISA1-TRg-15	-0.0487216	-0.668618	-0.0408363	0.723887
PRE4g3-RRP1-NRg-1	-0.103714	-1.37249	-0.104412	0.296296
PRE4g3-MES1-NRg-1	0.0503186	0.599043	0.0556794	0.465873
PRE4g3-SEC13-NRg-5	NA	NA	NA	NA
PRE4g3-MCM2-NRg-2	-0.0120012	-0.198616	-0.01292	0.816833
PRE4g3-ALA1-TRg-4	-0.0840214	-1.12044	-0.0797806	0.311151
PRE4g3-MTG2-TRg-5	0.174892	2.19351	0.175881	0.231487
PRE4g3-TIF35-NRg-3	0.100232	1.23791	0.0995405	0.296796
PRE4g3-NSE1-TRg-3	0.0783395	0.957694	0.0776452	0.286568
PRE4g3-NSE1-TRg-4	0.0454014	0.536105	0.0453835	0.216895
PRE4g3-MOB2-NRg-6	0.0438698	0.516501	0.0473619	0.760576
PRE4g3-VRG4-NRg-3	-0.195836	-2.5516	-0.191109	0.336647
PRE4g3-PRP9-TRg-3	-0.0140879	-0.225325	-0.00905398	0.886865
PRE4g3-HYM1-TRg-5	0.0150486	0.147606	0.020175	0.734819
PRE4g3-POP1-TRg-5	0.0193079	0.202123	0.0222209	0.777795
PRE4g3-POP1-TRg-9	-0.0251517	-0.366936	-0.0247897	0.106454
PRE4g3-RPL17A-TRg-1	-0.0539141	-0.735078	-0.0543974	0.247291
PRE4g3-SLD2-TRg-1	0.0644776	0.780269	0.0666553	0.345764
PRE4g3-CDC48-NRg-7	0.0407854	0.477023	0.0413725	0.497616
PRE4g3-FHL1-NRg-2	-0.0454332	-0.626528	-0.0457875	0.434658
PRE4g3-BET3-NRg-7	0.0974554	1.20237	0.096054	0.347693
PRE4g3-MAK21-TRg-1	0.0800072	0.979039	0.0805682	0.235524
PRE4g3-BRN1-TRg-4	-0.0557345	-0.758379	-0.0483953	0.728954
PRE4g3-FBA1-NRg-3	-0.0904993	-1.20335	-0.0936171	0.201852
PRE4g3-CDC42-TRg-6	NA	NA	NA	NA
PRE4g3-CDC42-TRg-7	-0.166388	-2.17468	-0.164394	0.200746
PRE4g3-COG4-NRg-1	0.0496335	0.590274	0.0510981	0.402264
PRE4g3-ATP3-NRg-3	0.115614	1.43478	0.11435	0.166582
PRE4g3-ATP3-NRg-2	0.106475	1.31781	0.105324	0.274517
PRE4g3-SMP3-TRg-5	-0.0419082	-0.581409	-0.0449159	0.326493
PRE4g3-CFT2-NRg-2	0.00748708	0.0508225	0.0125637	0.953109
PRE4g3-FAS2-TRg-5	0.0792964	0.969942	0.0823204	0.171403
PRE4g3-DBP2-NRg-3	0.0726336	0.884661	0.0712161	0.444833
PRE4g3-DBP2-NRg-2	0.0629586	0.760827	0.0630877	0.252473
PRE4g3-MPS2-NRg-4	-0.0200386	-0.301491	-0.0165998	0.728477
PRE4g3-ARC35-TRg-2	-0.085022	-1.13324	-0.0797322	0.359235
PRE4g3-ARC35-TRg-5	NA	NA	NA	NA
PRE4g3-MRD1-TRg-1	-0.0186056	-0.28315	-0.0170108	0.536523
PRE4g3-RLP7-TRg-1	0.0060039	0.0318385	0.006351	0.992815
PRE4g3-SPC34-TRg-1	0.0146879	0.142989	0.0165982	0.871137
PRE4g3-CDC45-TRg-2	0.0255974	0.282625	0.0253216	0.627928
PRE4g3-GCD6-TRg-3	0.035961	0.415273	0.0381284	0.332982
PRE4g3-GCD6-TRg-4	0.0585381	0.704247	0.0608996	0.377788
PRE4g3-YPT6-NRg-2	0.0392445	0.457299	0.0463686	0.459799
PRE4g3-RPS13-TRg-2	-0.0972364	-1.28958	-0.0957716	0.263762
PRE4g3-IPI3-TRg-3	0.0369868	0.428403	0.0355574	0.367466
PRE4g3-TIF5-NRg-9	-0.0303126	-0.432993	-0.0224131	0.77894
PRE4g3-TIF5-NRg-7	0.0766056	0.935501	0.0772859	0.252711
PRE4g3-TIF5-NRg-6	0.00615679	0.0337955	0.0104829	0.963453
PRE4g3-NAB3-TRg-3	0.0440332	0.518593	0.0512688	0.310864
PRE4g3-GCD2-TRg-1	0.0186459	0.193649	0.0224883	0.724614
PRE4g3-UBA1-TRg-2	0.0419436	0.491846	0.0471574	0.551331
PRE4g3-SLD3-TRg-6	-0.0797146	-1.06531	-0.0756106	0.359302
PRE4g3-LCB1-TRg-5	0.00470504	0.0152139	0.00429666	0.924798
PRE4g3-TOA2-TRg-6	0.0435591	0.512524	0.0480945	0.773453
PRE4g3-TOA2-TRg-1	0.0830649	1.01818	0.0847553	0.393909
PRE4g3-TOA2-TRg-3	0.0837691	1.02719	0.0866146	0.528088
PRE4g3-LSM2-TRg-1	-0.0284084	-0.408619	-0.0278658	0.533051
PRE4g3-YML6-TRg-13	-0.00512949	-0.110663	-0.00773618	0.631341
PRE4g3-YML6-TRg-12	-0.0877678	-1.16839	-0.0899871	0.263066
PRE4g3-UTP15-NRg-1	0.0329162	0.376301	0.03621	0.302649
PRE4g3-TIF6-NRg-8	0.059007	0.710249	0.0585429	0.386744
PRE4g3-SUP35-NRg-1	0.0617657	0.745559	0.0657263	0.344831
PRE4g3-MPP10-NRg-1	-0.00711137	-0.13603	-0.00687507	0.717902
PRE4g3-SWI3-TRg-7	-0.0808921	-1.08038	-0.0821681	0.326075
PRE4g3-SSN3-NRg-2	0.0446178	0.526074	0.0431523	0.293139
PRE4g3-SEC13-NRg-7	-0.0281089	-0.404787	-0.0216904	0.803437
PRE4g3-RPS15-NRg-3	-0.14239	-1.86752	-0.138037	0.363079
PRE4g3-RPL3-TRg-2	-0.0034897	-0.0896742	-0.0032728	0.492844
PRE4g3-FBA1-NRg-2	-0.0637767	-0.861314	-0.0671124	0.431705
PRE4g3-FBA1-NRg-1	-0.024303	-0.356073	-0.0276642	0.394686
PRE4g3-FBA1-NRg-5	-0.088965	-1.18371	-0.0922673	0.417394
PRE4g3-DAM1-TRg-2	-0.0733092	-0.983326	-0.0780667	0.318122
PRE4g3-NHP2-TRg-2	0.0571142	0.686023	0.056905	0.329737
PRE4g3-HCA4-NRg-6	0.0147199	0.143398	0.0147819	0.884953
PRE4g3-PRE3-TRg-4	-0.0381597	-0.533431	-0.0315611	0.77794
PRE4g3-DBP5-NRg-4	0.0695952	0.845771	0.07289	0.335551
PRE4g3-SPT6-NRg-4	-0.119113	-1.56959	-0.119822	0.231326
PRE4g3-SPT6-NRg-2	-0.198272	-2.58278	-0.199857	0.223693
PRE4g3-RPL18A-TRg-4	-0.0587007	-0.796344	-0.0576002	0.458336
PRE4g3-KSH1-TRg-1	-0.00412641	-0.0978237	-0.0028254	0.947295
PRE4g3-KSH1-TRg-3	0.0237176	0.258564	0.0224954	0.851672
PRE4g3-IPI3-NRg-1	0.0742741	0.905659	0.0767304	0.274461
PRE4g3-PGA2-TRg-8	0.0921752	1.13478	0.0900267	0.108118
PRE4g3-RPL18A-TRg-2	-0.0152539	-0.24025	-0.0152348	0.609788
PRE4g3-RPL33A-NRg-6	-0.0617282	-0.835094	-0.0599518	0.369629
PRE4g3-TAF12-NRg-2	0.0467704	0.553627	0.0466191	0.469075
PRE4g3-USE1-TRg-5	-0.0308511	-0.439885	-0.0345036	0.201265
PRE4g3-YNL114C-TRg-1	0.109205	1.35276	0.109406	0.305774
PRE4g3-SMC5-TRg-7	-0.0861424	-1.14758	-0.0865407	0.336558
PRE4g3-SMC5-TRg-6	0.0551942	0.661448	0.0541481	0.463285
PRE4g3-RSC58-TRg-1	0.220555	2.77797	0.219762	0.148768
PRE4g3-CTF13-TRg-2	0.0322289	0.367504	0.0372494	0.675672
PRE4g3-NAB2-NRg-2	0.0841756	1.03239	0.0878088	0.173246
PRE4g3-MCM7-TRg-4	-0.0814279	-1.08724	-0.0790199	0.30841
PRE4g3-BCP1-NRg-5	-0.0238639	-0.350452	-0.0195249	0.74696
PRE4g3-STU2-TRg-3	-0.047959	-0.658857	-0.0417428	0.629269
PRE4g3-SEC21-NRg-6	0.12907	1.60701	0.132951	0.188148
PRE4g3-SEC21-NRg-3	0.0777785	0.950514	0.0827262	0.354213
PRE4g3-RPL1B-TRg-3	-0.0535987	-0.731042	-0.0535118	0.265752
PRE4g3-SEC20-NRg-2	0.00195274	-0.020014	0.000966767	0.936581
PRE4g3-VMA3-NRg-2	0.0110617	0.0965758	0.0104536	0.654783
PRE4g3-SEC23-NRg-5	-0.18394	-2.39934	-0.185889	0.259634
PRE4g3-CDC28-TRg-4	-0.15203	-1.99091	-0.152226	0.198005
PRE4g3-RPN12-NRg-11	0.122379	1.52137	0.122056	0.272988
PRE4g3-PUP3-TRg-3	0.0365669	0.423028	0.0424661	0.590721
PRE4g3-SEC31-TRg-2	-0.0293852	-0.421123	-0.0263294	0.615875
PRE4g3-SED5-TRg-6	0.084277	1.03369	0.085645	0.310608
PRE4g3-SED5-TRg-5	0.0759238	0.926775	0.0751877	0.371592
PRE4g3-RPL33A-TRg-1	-0.0205302	-0.307784	-0.0208742	0.662144
PRE4g3-RPL33A-TRg-2	-0.029953	-0.42839	-0.0303553	0.610394
PRE4g3-MRPL11-TRg-2	0.0796001	0.973829	0.0785193	0.249278
PRE4g3-RTP1-NRg-2	0.0225164	0.243189	0.0246734	0.643582
PRE4g3-NUG1-TRg-2	0.0294839	0.332369	0.0311887	0.25245
PRE4g3-VPH2-TRg-4	0.0175983	0.18024	0.0171219	0.874907
PRE4g3-COP1-NRg-3	0.15839	1.9823	0.163977	0.292592
PRE4g3-CRM1-NRg-1	-0.028881	-0.414669	-0.0246627	0.599151
PRE4g3-RPL5-NRg-4	-0.0879412	-1.17061	-0.0810107	0.419825
PRE4g3-SNU13-NRg-4	-0.0361518	-0.507731	-0.0322409	0.294814
PRE4g3-PFS2-TRg-3	-0.0850343	-1.1334	-0.0787033	0.304115
PRE4g3-MPP10-TRg-2	-0.00212897	-0.0722576	-0.00148978	0.409244
PRE4g3-TSR4-NRg-2	0.00560377	0.0267171	0.00584132	0.996389
PRE4g3-RSC2-TRg-1	0.207653	2.61283	0.205599	0.174465
PRE4g3-SEC65-TRg-2	0.099484	1.22833	0.101964	0.287017
PRE4g3-SMI1-NRg-1	0.0259028	0.286533	0.0253518	0.714849
PRE4g3-RTT105-NRg-4	0.0290996	0.327451	0.0272365	0.549446
PRE4g3-VMA5-TRg-3	-0.0751363	-1.00671	-0.0750371	0.336889
PRE4g3-VMA5-TRg-5	-0.0710869	-0.95488	-0.0742083	0.362283
PRE4g3-RRP1-TRg-3	0.0573545	0.689097	0.0577165	0.238452
PRE4g3-CLC1-TRg-2	0.0793388	0.970485	0.0828915	0.291605
PRE4g3-GCD6-NRg-1	0.0634522	0.767145	0.0670674	0.340516
PRE4g3-GCD6-NRg-2	0.0856615	1.05141	0.086848	0.307301
PRE4g3-PXR1-TRg-1	0.048516	0.575969	0.0487509	0.35529
PRE4g3-CDC14-NRg-1	-0.0414309	-0.575301	-0.0400418	0.529526
PRE4g3-PCF11-TRg-6	-0.111573	-1.47308	-0.103827	0.452466
PRE4g3-PCF11-TRg-5	-0.0198988	-0.299702	-0.0110903	0.941503
PRE4g3-PCF11-TRg-4	-0.118114	-1.5568	-0.109128	0.327596
PRE4g3-SEC31-NRg-1	-0.0797652	-1.06596	-0.0626302	0.419844
PRE4g3-RRP5-NRg-1	0.0681019	0.826658	0.069745	0.467928
PRE4g3-PRE10-TRg-5	-0.00225925	-0.0739251	0.00267866	0.965419
PRE4g3-PRE10-TRg-1	0.013904	0.132956	0.0184064	0.729556
PRE4g3-RPS5-TRg-2	-0.114032	-1.50456	-0.110893	0.249086
PRE4g3-NSP1-TRg-4	0.0782515	0.956567	0.0810288	0.250065
[truncated: 13,201 more rows]

## Sheet: ypeg
strain	gi_score_method1	zscore_method1	gi_score_method2	qval_method2
PRE7g7-RPL15A-NRg-4	NA	NA	NA	NA
PRE7g7-RPL15A-NRg-5	NA	NA	NA	NA
PRE7g7-KRE33-TRg-1	-0.0233087	-0.343347	-0.0200767	0.842206
PRE7g7-PMI40-NRg-1	0.0737508	0.898961	0.0773432	0.375612
PRE7g7-NOP19-NRg-3	0.0861616	1.05781	0.0896666	0.662393
PRE7g7-SRP14-NRg-4	NA	NA	NA	NA
PRE7g7-SEC27-TRg-2	NA	NA	NA	NA
PRE7g7-GPI14-TRg-3	0.0353607	0.40759	0.0395857	0.885303
PRE7g7-PAH1-TRg-7	0.177036	2.22095	0.178332	0.489796
PRE7g7-PAH1-TRg-6	0.0845525	1.03722	0.0856583	0.772622
PRE7g7-PAH1-TRg-5	NA	NA	NA	NA
PRE7g7-PAH1-TRg-3	-0.0215183	-0.32043	-0.0204949	0.906256
PRE7g7-COG3-TRg-1	NA	NA	NA	NA
PRE7g7-HTS1-NRg-5	-0.000394962	-0.0500633	0.0030738	0.986202
PRE7g7-MSN5-TRg-7	NA	NA	NA	NA
PRE7g7-ERG26-TRg-1	NA	NA	NA	NA
PRE7g7-SMD2-TRg-5	-0.0679446	-0.914661	-0.0637274	0.807221
PRE7g7-SMD2-TRg-4	-0.0319045	-0.453368	-0.0275071	0.888985
PRE7g7-SMD2-TRg-1	0.0962699	1.18719	0.0980563	0.221452
PRE7g7-PRE7-TRg-4	NA	NA	NA	NA
PRE7g7-PRE7-TRg-7	0.0174897	0.17885	0.0186273	0.938512
PRE7g7-SEC6-TRg-3	NA	NA	NA	NA
PRE7g7-ESF2-NRg-1	NA	NA	NA	NA
PRE7g7-ESF2-NRg-3	-0.0229693	-0.339002	-0.0199177	0.764026
PRE7g7-AFG2-TRg-2	0.0127337	0.117977	0.0157242	0.966313
PRE7g7-RRP36-TRg-3	-0.0562832	-0.765402	-0.0540469	0.632955
PRE7g7-RRP36-TRg-5	-0.0169093	-0.261438	-0.0146636	0.920262
PRE7g7-GCR1-NRg-2	0.0670346	0.812998	0.0691986	0.706736
PRE7g7-PRE4-NRg-4	NA	NA	NA	NA
PRE7g7-PRE4-NRg-9	0.0430565	0.506091	0.0462799	0.522253
PRE7g7-DSN1-NRg-2	-0.147699	-1.93547	-0.146171	0.382551
PRE7g7-GPI11-TRg-3	-0.0549743	-0.748649	-0.0507378	0.764894
PRE7g7-POP3-TRg-1	0.0189473	0.197507	0.0222887	0.895049
PRE7g7-MNE1-TRg-5	NA	NA	NA	NA
PRE7g7-RRP12-NRg-1	0.0020057	-0.0193361	0.0052098	0.992873
PRE7g7-RSC6-TRg-2	0.00532354	0.0231304	0.00820909	0.996079
PRE7g7-CDC25-TRg-1	-0.0138789	-0.222651	-0.0147354	0.8765
PRE7g7-CDC25-TRg-9	NA	NA	NA	NA
PRE7g7-YPP1-NRg-3	-0.0456651	-0.629496	-0.0426641	0.680424
PRE7g7-NFS1-NRg-9	-0.0683124	-0.919368	-0.0655607	0.765113
PRE7g7-NFS1-NRg-8	NA	NA	NA	NA
PRE7g7-UBA2-TRg-1	NA	NA	NA	NA
PRE7g7-ARP2-NRg-3	NA	NA	NA	NA
PRE7g7-MAK16-TRg-1	0.0416635	0.488261	0.043568	0.711932
PRE7g7-CEP3-NRg-1	0.166953	2.0919	0.167492	0.301951
PRE7g7-GUK1-TRg-5	-0.000743128	-0.0545196	0.00266752	0.985261
PRE7g7-GUK1-TRg-2	0.0494007	0.587293	0.0517546	0.789581
PRE7g7-GPI12-NRg-6	-0.044757	-0.617873	-0.040646	0.730199
PRE7g7-RPS5-NRg-5	-0.0321361	-0.456333	-0.0291991	0.702619
PRE7g7-RPS5-NRg-2	NA	NA	NA	NA
PRE7g7-RPC19-NRg-1	0.0574487	0.690303	0.0601563	0.254823
PRE7g7-TIM54-TRg-1	-0.0846614	-1.12863	-0.0815008	0.411868
PRE7g7-TEN1-TRg-2	-0.01296	-0.210889	-0.0116081	0.938303
PRE7g7-SAH1-NRg-4	NA	NA	NA	NA
PRE7g7-SAH1-NRg-5	NA	NA	NA	NA
PRE7g7-SAH1-NRg-3	NA	NA	NA	NA
PRE7g7-ATP15-NRg-5	NA	NA	NA	NA
PRE7g7-SCD5-TRg-5	NA	NA	NA	NA
PRE7g7-ARB1-NRg-2	-0.00218953	-0.0730327	-0.000149483	0.978186
PRE7g7-ARB1-NRg-4	-0.0644296	-0.86967	-0.0608554	0.811985
PRE7g7-PUP2-TRg-1	NA	NA	NA	NA
PRE7g7-CCT8-TRg-2	NA	NA	NA	NA
PRE7g7-MCM4-TRg-1	-0.000679457	-0.0537047	-0.000129714	0.948321
PRE7g7-LSM4-TRg-1	-0.0684867	-0.9216	-0.0638968	0.804611
PRE7g7-NOP53-NRg-1	0.125869	1.56605	0.126727	0.597837
PRE7g7-ATP3-TRg-4	NA	NA	NA	NA
PRE7g7-AFG2-NRg-3	0.144	1.79811	0.14887	0.345615
PRE7g7-PRO3-NRg-3	NA	NA	NA	NA
PRE7g7-NRD1-NRg-10	0.0737527	0.898986	0.0734026	0.625264
PRE7g7-SEC61-TRg-2	-0.0106154	-0.180879	-0.00799419	0.945576
PRE7g7-RHO3-TRg-4	-0.0282949	-0.407167	-0.0247962	0.552403
PRE7g7-SNF2-TRg-6	NA	NA	NA	NA
PRE7g7-SMD2-NRg-3	NA	NA	NA	NA
PRE7g7-RSC4-TRg-2	-0.0864736	-1.15182	-0.0837178	0.604413
PRE7g7-RSC4-TRg-1	0.130491	1.6252	0.131859	0.731509
PRE7g7-TIF34-TRg-2	0.0278617	0.311606	0.0280829	0.145104
PRE7g7-BET1-NRg-1	NA	NA	NA	NA
PRE7g7-CDC8-NRg-2	-0.0314716	-0.447827	-0.0277923	0.799447
PRE7g7-PRP42-TRg-2	-0.0456019	-0.628687	-0.042528	0.769398
PRE7g7-RRB1-TRg-2	0.0707023	0.859942	0.0740879	0.504139
PRE7g7-SPC24-TRg-1	-0.0450947	-0.622194	-0.0453578	0.694202
PRE7g7-ILS1-NRg-1	0.0214462	0.229491	0.0230199	0.920575
PRE7g7-GFA1-TRg-2	-0.0221361	-0.328338	-0.0183794	0.909083
PRE7g7-SEC21-NRg-10	0.184915	2.3218	0.187583	0.551331
PRE7g7-RPC10-NRg-1	-0.063203	-0.853971	-0.0629587	0.589463
PRE7g7-RPB10-TRg-3	-0.0796187	-1.06408	-0.0788898	0.642667
PRE7g7-RPB10-TRg-2	NA	NA	NA	NA
PRE7g7-YNL181W-TRg-1	-0.126021	-1.65801	-0.122337	0.487876
PRE7g7-RAD3-NRg-1	-0.0747737	-1.00207	-0.0716658	0.446732
PRE7g7-NOP10-TRg-1	0.0418701	0.490906	0.0445866	0.727732
PRE7g7-BFR2-TRg-3	0.0339484	0.389513	0.0373512	0.754298
PRE7g7-MCM2-TRg-6	-0.126776	-1.66767	-0.122581	0.571011
PRE7g7-MCM2-TRg-4	NA	NA	NA	NA
PRE7g7-MPP10-TRg-1	0.0592501	0.71336	0.0616354	0.449676
PRE7g7-RET2-TRg-4	-0.0270585	-0.391342	-0.0243914	0.882927
PRE7g7-RET2-TRg-1	NA	NA	NA	NA
PRE7g7-RPS2-NRg-1	NA	NA	NA	NA
PRE7g7-RPS2-NRg-2	-0.00980391	-0.170493	-0.00915809	0.922919
PRE7g7-ORC4-NRg-3	-0.0149837	-0.236792	-0.0115872	0.846546
PRE7g7-TIP20-TRg-7	-0.105988	-1.40159	-0.103056	0.690636
PRE7g7-SMT3-TRg-1	0.0375525	0.435643	0.0402866	0.823272
PRE7g7-MSS18-NRg-6	0.0269894	0.300442	0.0304218	0.924564
PRE7g7-YEF3-NRg-9	-0.0396638	-0.552682	-0.0406909	0.786127
PRE7g7-ASK1-NRg-1	NA	NA	NA	NA
PRE7g7-SMC1-TRg-1	-0.0234064	-0.344597	-0.0220709	0.925861
PRE7g7-NIP1-NRg-1	NA	NA	NA	NA
PRE7g7-RPP1-NRg-1	0.0164924	0.166085	0.01887	0.903973
PRE7g7-YDJ1-TRg-6	0.0518601	0.618772	0.0542568	0.659131
PRE7g7-SUB2-NRg-1	0.0993936	1.22717	0.100859	0.683345
PRE7g7-TIM10-NRg-8	-0.079364	-1.06082	-0.0758264	0.499767
PRE7g7-TIM10-NRg-4	0.0764554	0.933578	0.0790215	0.35093
PRE7g7-TIM10-NRg-7	NA	NA	NA	NA
PRE7g7-SKI6-TRg-4	-0.127482	-1.67671	-0.124004	0.479689
PRE7g7-TUB4-TRg-1	NA	NA	NA	NA
PRE7g7-CDC37-NRg-2	NA	NA	NA	NA
PRE7g7-ISD11-TRg-3	NA	NA	NA	NA
PRE7g7-YOS1-TRg-4	NA	NA	NA	NA
PRE7g7-SSC1-TRg-6	0.148014	1.84949	0.148599	0.362069
PRE7g7-MTR3-TRg-5	0.0462506	0.546974	0.0477289	0.886081
PRE7g7-MTR3-TRg-6	-0.0492495	-0.675375	-0.0460599	0.365011
PRE7g7-TFA1-TRg-2	NA	NA	NA	NA
PRE7g7-CDC3-NRg-3	-0.0211578	-0.315816	-0.0174852	0.773468
PRE7g7-ERG25-TA-18	NA	NA	NA	NA
PRE7g7-RPB11-TRg-4	0.0644865	0.780384	0.0674068	0.712391
PRE7g7-RPB11-TRg-1	-0.147908	-1.93815	-0.147698	0.292442
PRE7g7-RPB11-TRg-2	-0.0258477	-0.375844	-0.0251997	0.809241
PRE7g7-DED1-TRg-3	NA	NA	NA	NA
PRE7g7-DED1-TRg-1	0.0811175	0.993251	0.0842065	0.519762
PRE7g7-DED1-TRg-6	NA	NA	NA	NA
PRE7g7-DED1-TRg-4	-0.0317988	-0.452015	-0.0289681	0.813487
PRE7g7-RPL10-NRg-5	0.00402974	0.0065704	0.00656725	0.990749
PRE7g7-RPL10-NRg-4	-0.1784	-2.32843	-0.175173	0.423073
PRE7g7-EFB1-NRg-1	0.0687222	0.834599	0.0708023	0.725999
PRE7g7-EFB1-NRg-5	NA	NA	NA	NA
PRE7g7-EFB1-NRg-4	-0.00282865	-0.0812132	-0.00122805	0.945491
PRE7g7-RPT3-NRg-1	NA	NA	NA	NA
PRE7g7-SAC6-TRg-8	NA	NA	NA	NA
PRE7g7-SAC6-TRg-4	NA	NA	NA	NA
PRE7g7-SAC6-TRg-5	NA	NA	NA	NA
PRE7g7-SAC6-TRg-3	NA	NA	NA	NA
PRE7g7-DIM1-TRg-5	-0.0270168	-0.390808	-0.0234003	0.850922
PRE7g7-DIM1-TRg-7	0.0399804	0.466719	0.0437948	0.845963
PRE7g7-RPC17-NRg-1	0.00292053	-0.00762689	0.00542235	0.982962
PRE7g7-RPC17-NRg-2	0.114125	1.41573	0.116409	0.399898
PRE7g7-YDR341C-TRg-1	0.146138	1.82548	0.147278	0.302048
PRE7g7-RAP1-NRg-8	0.011436	0.101366	0.0163815	0.940126
PRE7g7-RAP1-NRg-5	NA	NA	NA	NA
PRE7g7-RAP1-NRg-2	-0.0593273	-0.804365	-0.0581388	0.819904
PRE7g7-SEC26-NRg-3	NA	NA	NA	NA
PRE7g7-SPP41-TRg-3	0.028147	0.315258	0.0300351	0.53727
PRE7g7-TAP42-NRg-1	0.0171027	0.173897	0.0187185	0.954515
PRE7g7-PGA2-TRg-6	0.0385058	0.447845	0.0417873	0.792523
PRE7g7-BRL1-TRg-1	0.0858166	1.0534	0.0869657	0.469905
PRE7g7-FOL2-TRg-1	NA	NA	NA	NA
PRE7g7-NAB3-NRg-5	-0.0486014	-0.667079	-0.0448777	0.709778
PRE7g7-SNF4-TRg-4	0.000236881	-0.0419761	0.0011409	0.95409
PRE7g7-HRR25-TRg-2	NA	NA	NA	NA
PRE7g7-TRS23-TRg-4	-0.0607662	-0.822782	-0.060068	0.735326
PRE7g7-CTR86-TRg-4	-0.14315	-1.87725	-0.139668	0.445049
PRE7g7-RPB5-TRg-5	NA	NA	NA	NA
PRE7g7-SPN1-NRg-2	-0.11393	-1.50325	-0.11316	0.689138
PRE7g7-SPN1-NRg-1	0.0110983	0.0970443	0.011581	0.988956
PRE7g7-SEC61-NRg-1	0.0270658	0.301419	0.0295027	0.859834
PRE7g7-SEC61-NRg-7	0.132564	1.65174	0.134835	0.460351
PRE7g7-TUS1-TRg-3	-0.0654683	-0.882966	-0.0624853	0.710587
PRE7g7-OLE1-NRg-2	NA	NA	NA	NA
PRE7g7-AFG2-TRg-1	-0.0601603	-0.815027	-0.0604279	0.562729
PRE7g7-TOA2-NRg-1	NA	NA	NA	NA
PRE7g7-USO1-TRg-1	0.0499971	0.594927	0.0509028	0.477899
PRE7g7-UTP22-NRg-2	0.0284409	0.31902	0.031936	0.930301
PRE7g7-RIB1-TRg-3	-0.0199352	-0.300168	-0.0202653	0.931881
PRE7g7-RIB1-TRg-7	NA	NA	NA	NA
PRE7g7-RIB1-TRg-4	-0.0545297	-0.742958	-0.0547748	0.638823
PRE7g7-COG1-TRg-1	NA	NA	NA	NA
PRE7g7-RPL32-NRg-2	0.0273554	0.305126	0.0292689	0.886055
PRE7g7-GLC7-NRg-3	-0.0391195	-0.545716	-0.0353704	0.82447
PRE7g7-GLC7-NRg-4	NA	NA	NA	NA
PRE7g7-HSF1-TRg-2	0.165621	2.07484	0.16924	0.38964
PRE7g7-DAM1-NRg-5	NA	NA	NA	NA
PRE7g7-SEC18-TRg-4	0.0347322	0.399545	0.0369138	0.844719
PRE7g7-SEC18-TRg-5	0.107317	1.32859	0.109532	0.469422
PRE7g7-PAB1-NRg-3	-0.024174	-0.354422	-0.0235055	0.792876
PRE7g7-POP8-TRg-2	-0.159988	-2.09276	-0.157187	0.319272
PRE7g7-PAB1-NRg-4	0.0652623	0.790313	0.0660006	0.371884
PRE7g7-BIG1-TRg-4	-0.00522976	-0.111946	-0.0039883	0.954054
PRE7g7-BIG1-TRg-5	-0.0656967	-0.885889	-0.0633121	0.833298
PRE7g7-BIG1-TRg-6	NA	NA	NA	NA
PRE7g7-RPO41-NRg-1	NA	NA	NA	NA
PRE7g7-RVB2-NRg-2	-0.0901375	-1.19872	-0.0867111	0.614183
PRE7g7-PET117-NRg-8	NA	NA	NA	NA
PRE7g7-VPS45-NRg-9	NA	NA	NA	NA
PRE7g7-YCG1-NRg-1	NA	NA	NA	NA
PRE7g7-NOC4-NRg-1	-0.0752962	-1.00876	-0.072274	0.675338
PRE7g7-NMD3-NRg-2	NA	NA	NA	NA
PRE7g7-DRS1-TRg-2	-0.0524234	-0.715999	-0.0490204	0.473148
PRE7g7-HTB1-NRg-2	0.048853	0.580284	0.0507061	0.545435
PRE7g7-IPI1-TRg-2	NA	NA	NA	NA
PRE7g7-SEC18-NRg-1	NA	NA	NA	NA
PRE7g7-SEC18-NRg-2	-0.127796	-1.68073	-0.12834	0.460154
PRE7g7-JIP5-NRg-2	0.0441532	0.520128	0.0478058	0.776943
PRE7g7-YPT1-TRg-3	NA	NA	NA	NA
PRE7g7-YPT1-TRg-2	NA	NA	NA	NA
PRE7g7-CLF1-NRg-2	NA	NA	NA	NA
PRE7g7-SNF2-NRg-7	-0.00449201	-0.102503	-0.000764	0.954705
PRE7g7-SNF2-NRg-4	-0.114361	-1.50876	-0.110242	0.490031
PRE7g7-RPL25-NRg-1	NA	NA	NA	NA
PRE7g7-NOP56-TRg-1	-0.0552299	-0.751919	-0.0513158	0.593604
PRE7g7-NOP56-TRg-2	NA	NA	NA	NA
PRE7g7-TRS31-TRg-1	-0.055136	-0.750718	-0.0556853	0.538298
PRE7g7-DBF4-TRg-2	NA	NA	NA	NA
PRE7g7-DBF4-TRg-1	NA	NA	NA	NA
PRE7g7-RPC19-TRg-4	-0.00309962	-0.0846814	-0.000395121	0.985319
PRE7g7-RPC19-TRg-6	0.137266	1.71193	0.139962	0.582897
PRE7g7-RPC19-TRg-3	0.0390434	0.454726	0.041512	0.863795
PRE7g7-ROK1-NRg-1	0.128659	1.60176	0.132117	0.613017
PRE7g7-CDC33-TRg-4	NA	NA	NA	NA
PRE7g7-DHR2-TRg-3	NA	NA	NA	NA
PRE7g7-RRP42-NRg-5	0.0774546	0.946367	0.081113	0.123601
PRE7g7-CLF1-TRg-1	-0.0663419	-0.894147	-0.0671753	0.383969
PRE7g7-ERG11-NA-16	NA	NA	NA	NA
PRE7g7-VAS1-NRg-4	0.0110437	0.0963448	0.0118267	0.978556
PRE7g7-PIK1-NRg-2	-0.115841	-1.52771	-0.113599	0.361638
PRE7g7-SAR1-NRg-7	-0.129654	-1.7045	-0.125243	0.469075
PRE7g7-SAR1-NRg-4	-0.112324	-1.48269	-0.111023	0.680516
PRE7g7-RPS3-TRg-1	NA	NA	NA	NA
PRE7g7-YTM1-TRg-2	-0.0467083	-0.642849	-0.0439218	0.828076
PRE7g7-SUI3-NRg-5	0.0632295	0.764294	0.0658827	0.657464
PRE7g7-SUI3-NRg-2	-0.0303037	-0.432878	-0.0277888	0.805314
PRE7g7-RRP7-TRg-4	0.0258647	0.286046	0.0293861	0.878012
PRE7g7-RRP7-TRg-6	NA	NA	NA	NA
PRE7g7-NIP7-TRg-2	NA	NA	NA	NA
PRE7g7-MDM35-TRg-1	-0.15029	-1.96863	-0.14734	0.525652
PRE7g7-ALA1-NRg-1	-0.0233958	-0.344461	-0.0209281	0.861964
PRE7g7-DOA4-NRg-2	-0.055863	-0.760024	-0.0511504	0.539169
PRE7g7-RPS13-NRg-1	NA	NA	NA	NA
PRE7g7-YSF3-TRg-2	0.0268107	0.298154	0.0288538	0.813595
PRE7g7-RPS2-NRg-11	-0.207073	-2.69542	-0.2048	0.182889
PRE7g7-SSL1-TRg-10	-0.0645256	-0.8709	-0.0618589	0.698057
PRE7g7-NIP7-TRg-1	-0.0739665	-0.991739	-0.0706553	0.455306
PRE7g7-LST8-NRg-1	NA	NA	NA	NA
PRE7g7-TAF4-TRg-3	-0.24679	-3.20378	-0.247102	0.206145
PRE7g7-HAS1-TRg-2	0.0488635	0.580417	0.0507176	0.833103
PRE7g7-GLC7-TRg-2	NA	NA	NA	NA
PRE7g7-CDC45-NRg-1	-0.0570993	-0.775847	-0.0566377	0.786821
PRE7g7-SEC22-NRg-8	NA	NA	NA	NA
PRE7g7-YOS1-TRg-2	NA	NA	NA	NA
PRE7g7-RBA50-TRg-3	-0.082721	-1.10379	-0.079114	0.717133
PRE7g7-SPP41-NRg-2	-0.0469793	-0.646317	-0.0442202	0.628285
PRE7g7-PRP46-TRg-2	-0.0229776	-0.339109	-0.0220144	0.906507
PRE7g7-PGA2-NRg-1	NA	NA	NA	NA
PRE7g7-CBF5-TRg-3	-0.167444	-2.1882	-0.163318	0.443568
PRE7g7-TCP1-NRg-3	0.0509424	0.607026	0.0548476	0.346899
PRE7g7-TCP1-NRg-2	0.05161	0.615571	0.0527385	0.740253
PRE7g7-ERG26-NRg-2	-0.0411685	-0.571942	-0.0387117	0.601667
PRE7g7-ERG26-NRg-4	-0.0982855	-1.30301	-0.09593	0.589727
PRE7g7-MES1-TRg-5	-0.101423	-1.34317	-0.0986939	0.464283
PRE7g7-HTS1-TRg-2	0.0227777	0.246534	0.0245469	0.941119
PRE7g7-SSS1-TRg-3	-0.0828209	-1.10507	-0.0807884	0.695893
PRE7g7-SSS1-TRg-2	-0.105269	-1.3924	-0.102575	0.503223
PRE7g7-SYS1-TRg-7	NA	NA	NA	NA
PRE7g7-SYS1-TRg-2	-0.05657	-0.769072	-0.0556846	0.808032
PRE7g7-SYS1-TRg-1	NA	NA	NA	NA
PRE7g7-BFR2-TRg-1	-0.229805	-2.98638	-0.226755	0.362086
PRE7g7-EOS1-TRg-3	-0.0598614	-0.8112	-0.0576789	0.717071
PRE7g7-TAF4-NRg-1	-0.053923	-0.735192	-0.0545457	0.627928
PRE7g7-ARL3-NRg-8	-0.00329773	-0.0872171	-0.00165086	0.955764
PRE7g7-RPN5-NRg-1	NA	NA	NA	NA
PRE7g7-TIM9-NRg-2	0.0784074	0.958563	0.0809356	0.57801
PRE7g7-NUP57-NRg-3	NA	NA	NA	NA
PRE7g7-VPS4-TRg-1	0.121262	1.50708	0.12128	0.412681
PRE7g7-CDC3-TRg-4	NA	NA	NA	NA
PRE7g7-BBP1-NRg-1	0.0425784	0.499971	0.0459829	0.709724
PRE7g7-BBP1-NRg-2	-0.0944745	-1.25423	-0.0915859	0.511945
PRE7g7-USE1-NRg-3	-0.0194413	-0.293846	-0.0160794	0.921125
PRE7g7-CCT7-TRg-1	NA	NA	NA	NA
PRE7g7-SAH1-TRg-3	NA	NA	NA	NA
PRE7g7-CHS2-TRg-1	NA	NA	NA	NA
PRE7g7-DPM1-TRg-2	NA	NA	NA	NA
PRE7g7-BBP1-TRg-1	-0.0250328	-0.365414	-0.0257784	0.853034
PRE7g7-NRD1-TRg-4	0.0798552	0.977094	0.0812157	0.475561
PRE7g7-RPB3-NRg-1	0.0297528	0.335811	0.0313083	0.905855
PRE7g7-PHO85-NRg-6	NA	NA	NA	NA
PRE7g7-SNF6-TRg-6	0.0315716	0.35909	0.0349011	0.868345
PRE7g7-PRP38-NRg-2	NA	NA	NA	NA
PRE7g7-OAR1-NRg-3	NA	NA	NA	NA
PRE7g7-ROX3-NRg-1	0.137466	1.71448	0.141936	0.486015
PRE7g7-YPP1-TRg-6	NA	NA	NA	NA
PRE7g7-CBF2-NRg-8	0.0227494	0.246172	0.0268496	0.896725
PRE7g7-SPT6-TRg-5	-0.0371377	-0.520349	-0.0346816	0.757595
PRE7g7-SEC10-NRg-1	NA	NA	NA	NA
PRE7g7-NSL1-NRg-3	-0.177638	-2.31867	-0.178906	0.366285
PRE7g7-NRD1-NRg-8	-0.149712	-1.96123	-0.148205	0.216329
PRE7g7-RPB3-TRg-1	0.0579763	0.697057	0.0583907	0.476333
PRE7g7-NRD1-NRg-4	-0.00892135	-0.159196	-0.00816948	0.925367
PRE7g7-RVB1-TRg-2	NA	NA	NA	NA
PRE7g7-TIF5-NRg-8	NA	NA	NA	NA
PRE7g7-EOS1-NRg-1	-0.0783834	-1.04827	-0.0771727	0.474355
PRE7g7-ERG25-NA-26	-0.0276922	-0.399453	-0.0245182	0.900132
PRE7g7-MSL5-NRg-4	NA	NA	NA	NA
PRE7g7-SEC24-TRg-2	NA	NA	NA	NA
PRE7g7-RPL30-NRg-5	-0.0420589	-0.583339	-0.0410756	0.641258
PRE7g7-SNU71-NRg-3	0.0377913	0.438699	0.0407353	0.805447
PRE7g7-CDC33-NRg-1	0.0503857	0.599901	0.0534699	0.865165
PRE7g7-RPN6-TRg-4	-0.00900692	-0.160292	-0.00746534	0.931993
PRE7g7-NAB2-TRg-4	NA	NA	NA	NA
PRE7g7-NAB2-TRg-6	-0.110903	-1.4645	-0.109349	0.434843
PRE7g7-YTM1-NRg-1	-0.0682046	-0.917989	-0.0653079	0.379035
PRE7g7-OLE1-TRg-8	NA	NA	NA	NA
PRE7g7-OLE1-TRg-1	NA	NA	NA	NA
PRE7g7-UTP7-TRg-4	-0.00180987	-0.0681733	0.0015874	0.885514
PRE7g7-ACT1-NRg-6	-0.0141805	-0.22651	-0.0155764	0.913719
PRE7g7-RPL18A-NRg-3	NA	NA	NA	NA
PRE7g7-BRX1-NRg-1	-0.0767954	-1.02795	-0.0740151	0.754278
PRE7g7-NAF1-TRg-8	0.0552449	0.662096	0.0590081	0.798384
PRE7g7-NAF1-TRg-6	-0.0324949	-0.460925	-0.0282024	0.78167
PRE7g7-NAF1-TRg-4	-0.0390573	-0.54492	-0.0351024	0.365435
PRE7g7-CDC8-TRg-2	0.0384642	0.447313	0.0422588	0.931268
PRE7g7-NSE4-TRg-1	-0.0454675	-0.626966	-0.0429042	0.794175
PRE7g7-PAB1-NRg-2	-0.0420735	-0.583525	-0.0418912	0.789452
PRE7g7-PRP43-TRg-4	0.00921421	0.0729288	0.0106304	0.988067
PRE7g7-SEC2-NRg-3	-0.1181	-1.55662	-0.114613	0.247491
PRE7g7-SEC2-NRg-6	-0.120449	-1.58669	-0.116704	0.37933
PRE7g7-MPP10-NRg-5	NA	NA	NA	NA
PRE7g7-YDR355C-TRg-2	-0.061658	-0.834196	-0.0621553	0.772614
PRE7g7-YLR339C-TRg-9	NA	NA	NA	NA
PRE7g7-SNM1-TRg-2	NA	NA	NA	NA
PRE7g7-ALR1-NRg-4	NA	NA	NA	NA
PRE7g7-ALR1-NRg-1	NA	NA	NA	NA
PRE7g7-ALR1-NRg-3	0.0324688	0.370574	0.0345969	0.845192
PRE7g7-RPL10-TRg-1	-0.0940223	-1.24844	-0.0923681	0.620274
PRE7g7-RPL28-TRg-2	0.0413535	0.484294	0.0432973	0.391416
PRE7g7-UTP25-TRg-1	NA	NA	NA	NA
PRE7g7-POB3-TRg-1	NA	NA	NA	NA
PRE7g7-POB3-TRg-3	0.0925112	1.13908	0.093191	0.770528
PRE7g7-POB3-TRg-2	NA	NA	NA	NA
PRE7g7-MED11-TRg-1	NA	NA	NA	NA
PRE7g7-ISA1-TRg-15	NA	NA	NA	NA
PRE7g7-RRP1-NRg-1	0.201146	2.52955	0.205041	0.245108
PRE7g7-MES1-NRg-1	0.111373	1.38051	0.112352	0.518943
PRE7g7-SEC13-NRg-5	NA	NA	NA	NA
PRE7g7-MCM2-NRg-2	NA	NA	NA	NA
PRE7g7-ALA1-TRg-4	-0.184012	-2.40026	-0.183567	0.30645
PRE7g7-MTG2-TRg-5	NA	NA	NA	NA
PRE7g7-TIF35-NRg-3	0.0708771	0.86218	0.0743153	0.618642
PRE7g7-NSE1-TRg-3	NA	NA	NA	NA
PRE7g7-NSE1-TRg-4	0.056827	0.682346	0.0598275	0.695354
PRE7g7-MOB2-NRg-6	NA	NA	NA	NA
PRE7g7-VRG4-NRg-3	-0.0358129	-0.503393	-0.035203	0.615397
PRE7g7-PRP9-TRg-3	NA	NA	NA	NA
PRE7g7-HYM1-TRg-5	NA	NA	NA	NA
PRE7g7-POP1-TRg-5	-0.020681	-0.309714	-0.0184641	0.918149
PRE7g7-POP1-TRg-9	-0.117494	-1.54887	-0.11339	0.563241
PRE7g7-RPL17A-TRg-1	0.0158185	0.157461	0.0185523	0.929012
PRE7g7-SLD2-TRg-1	NA	NA	NA	NA
PRE7g7-CDC48-NRg-7	0.102539	1.26744	0.106243	0.431508
PRE7g7-FHL1-NRg-2	-0.073713	-0.988493	-0.0702299	0.477899
PRE7g7-BET3-NRg-7	-0.0332112	-0.470092	-0.0294431	0.903424
PRE7g7-MAK21-TRg-1	-0.0522645	-0.713965	-0.0495704	0.76058
PRE7g7-BRN1-TRg-4	-0.0160744	-0.250751	-0.0165001	0.830479
PRE7g7-FBA1-NRg-3	-0.00666665	-0.130337	-0.00296652	0.923016
PRE7g7-CDC42-TRg-6	NA	NA	NA	NA
PRE7g7-CDC42-TRg-7	NA	NA	NA	NA
PRE7g7-COG4-NRg-1	0.0245563	0.269299	0.0284017	0.931268
PRE7g7-ATP3-NRg-3	NA	NA	NA	NA
PRE7g7-ATP3-NRg-2	NA	NA	NA	NA
PRE7g7-SMP3-TRg-5	-0.170254	-2.22417	-0.166495	0.196809
PRE7g7-CFT2-NRg-2	0.0791925	0.968613	0.0786521	0.847825
PRE7g7-FAS2-TRg-5	0.0314927	0.358081	0.0328972	0.897374
PRE7g7-DBP2-NRg-3	-0.0438282	-0.605984	-0.0404039	0.712565
PRE7g7-DBP2-NRg-2	-0.0126883	-0.207412	-0.0092883	0.895566
PRE7g7-MPS2-NRg-4	-0.0833089	-1.11132	-0.0801782	0.782838
PRE7g7-ARC35-TRg-2	NA	NA	NA	NA
PRE7g7-ARC35-TRg-5	NA	NA	NA	NA
PRE7g7-MRD1-TRg-1	0.00250704	-0.0129193	0.00478183	0.983794
PRE7g7-RLP7-TRg-1	-0.0242404	-0.355272	-0.0216954	0.756859
PRE7g7-SPC34-TRg-1	-0.00459188	-0.103782	-0.00388657	0.952875
PRE7g7-CDC45-TRg-2	0.0071735	0.0468088	0.00893963	0.991492
PRE7g7-GCD6-TRg-3	NA	NA	NA	NA
PRE7g7-GCD6-TRg-4	NA	NA	NA	NA
PRE7g7-YPT6-NRg-2	NA	NA	NA	NA
PRE7g7-RPS13-TRg-2	NA	NA	NA	NA
PRE7g7-IPI3-TRg-3	0.1226	1.52421	0.126059	0.238452
PRE7g7-TIF5-NRg-9	-0.033853	-0.478308	-0.0325352	0.899799
PRE7g7-TIF5-NRg-7	NA	NA	NA	NA
PRE7g7-TIF5-NRg-6	-0.0281287	-0.40504	-0.0268412	0.835734
PRE7g7-NAB3-TRg-3	-0.0272832	-0.394218	-0.0279762	0.719653
PRE7g7-GCD2-TRg-1	0.0520429	0.621112	0.0522365	0.717786
PRE7g7-UBA1-TRg-2	0.226499	2.85406	0.227657	0.301483
PRE7g7-SLD3-TRg-6	0.00570294	0.0279865	0.00612387	0.991296
PRE7g7-LCB1-TRg-5	0.0857965	1.05314	0.0883717	0.688611
PRE7g7-TOA2-TRg-6	NA	NA	NA	NA
PRE7g7-TOA2-TRg-1	0.0084463	0.0630999	0.00970416	0.992873
PRE7g7-TOA2-TRg-3	NA	NA	NA	NA
PRE7g7-LSM2-TRg-1	-0.0774964	-1.03692	-0.0741158	0.276172
PRE7g7-YML6-TRg-13	NA	NA	NA	NA
PRE7g7-YML6-TRg-12	-0.102602	-1.35826	-0.0996931	0.358676
PRE7g7-UTP15-NRg-1	NA	NA	NA	NA
PRE7g7-TIF6-NRg-8	0.0892713	1.09762	0.0934441	0.541287
PRE7g7-SUP35-NRg-1	-0.046619	-0.641706	-0.0457425	0.314168
PRE7g7-MPP10-NRg-1	-0.00871877	-0.156603	-0.00619789	0.904193
PRE7g7-SWI3-TRg-7	NA	NA	NA	NA
PRE7g7-SSN3-NRg-2	0.267249	3.37564	0.271132	0.372622
PRE7g7-SEC13-NRg-7	-0.0361186	-0.507306	-0.0368213	0.803437
PRE7g7-RPS15-NRg-3	NA	NA	NA	NA
PRE7g7-RPL3-TRg-2	-0.101633	-1.34586	-0.100532	0.543999
PRE7g7-FBA1-NRg-2	-0.0523389	-0.714917	-0.0489269	0.761287
PRE7g7-FBA1-NRg-1	NA	NA	NA	NA
PRE7g7-FBA1-NRg-5	NA	NA	NA	NA
PRE7g7-DAM1-TRg-2	NA	NA	NA	NA
PRE7g7-NHP2-TRg-2	0.0564518	0.677544	0.0603041	0.27234
PRE7g7-HCA4-NRg-6	NA	NA	NA	NA
PRE7g7-PRE3-TRg-4	NA	NA	NA	NA
PRE7g7-DBP5-NRg-4	0.0187	0.194342	0.0197562	0.932396
PRE7g7-SPT6-NRg-4	NA	NA	NA	NA
PRE7g7-SPT6-NRg-2	NA	NA	NA	NA
PRE7g7-RPL18A-TRg-4	NA	NA	NA	NA
PRE7g7-KSH1-TRg-1	NA	NA	NA	NA
PRE7g7-KSH1-TRg-3	-0.00556274	-0.116208	-0.00244475	0.952191
PRE7g7-IPI3-NRg-1	0.0784665	0.959319	0.0811387	0.754951
PRE7g7-PGA2-TRg-8	NA	NA	NA	NA
PRE7g7-RPL18A-TRg-2	NA	NA	NA	NA
PRE7g7-RPL33A-NRg-6	0.0433164	0.509418	0.0462459	0.727274
PRE7g7-TAF12-NRg-2	0.0609201	0.734736	0.0622357	0.76676
PRE7g7-USE1-TRg-5	NA	NA	NA	NA
PRE7g7-YNL114C-TRg-1	-0.0508318	-0.695627	-0.0475044	0.658065
PRE7g7-SMC5-TRg-7	-0.0543628	-0.740821	-0.0502209	0.787756
PRE7g7-SMC5-TRg-6	-0.0661037	-0.891099	-0.0623682	0.760233
PRE7g7-RSC58-TRg-1	-0.0497487	-0.681764	-0.0468266	0.822247
PRE7g7-CTF13-TRg-2	0.140144	1.74876	0.140418	0.475182
PRE7g7-NAB2-NRg-2	0.127179	1.58281	0.12774	0.706326
PRE7g7-MCM7-TRg-4	-0.0292985	-0.420013	-0.0302482	0.628701
PRE7g7-BCP1-NRg-5	0.149436	1.86769	0.151168	0.322152
PRE7g7-STU2-TRg-3	NA	NA	NA	NA
PRE7g7-SEC21-NRg-6	-0.056076	-0.76275	-0.0543493	0.84294
PRE7g7-SEC21-NRg-3	-0.0572263	-0.777472	-0.0565573	0.766494
PRE7g7-RPL1B-TRg-3	NA	NA	NA	NA
PRE7g7-SEC20-NRg-2	0.0116108	0.103604	0.0135396	0.887096
PRE7g7-VMA3-NRg-2	NA	NA	NA	NA
PRE7g7-SEC23-NRg-5	NA	NA	NA	NA
PRE7g7-CDC28-TRg-4	NA	NA	NA	NA
PRE7g7-RPN12-NRg-11	-0.0508697	-0.696111	-0.0473214	0.813122
PRE7g7-PUP3-TRg-3	0.195399	2.45599	0.195437	0.19737
PRE7g7-SEC31-TRg-2	NA	NA	NA	NA
PRE7g7-SED5-TRg-6	NA	NA	NA	NA
PRE7g7-SED5-TRg-5	NA	NA	NA	NA
PRE7g7-RPL33A-TRg-1	0.104098	1.28738	0.107451	0.485138
PRE7g7-RPL33A-TRg-2	0.0711797	0.866053	0.0743534	0.706926
PRE7g7-MRPL11-TRg-2	NA	NA	NA	NA
PRE7g7-RTP1-NRg-2	0.0300525	0.339647	0.0328807	0.906974
PRE7g7-NUG1-TRg-2	NA	NA	NA	NA
PRE7g7-VPH2-TRg-4	NA	NA	NA	NA
PRE7g7-COP1-NRg-3	NA	NA	NA	NA
PRE7g7-CRM1-NRg-1	-0.0512596	-0.701102	-0.0494269	0.423802
PRE7g7-RPL5-NRg-4	NA	NA	NA	NA
PRE7g7-SNU13-NRg-4	NA	NA	NA	NA
PRE7g7-PFS2-TRg-3	NA	NA	NA	NA
PRE7g7-MPP10-TRg-2	NA	NA	NA	NA
PRE7g7-TSR4-NRg-2	0.0141495	0.136098	0.0175783	0.66197
PRE7g7-RSC2-TRg-1	0.126223	1.57058	0.130361	0.502813
PRE7g7-SEC65-TRg-2	0.143447	1.79104	0.147418	0.306584
PRE7g7-SMI1-NRg-1	NA	NA	NA	NA
PRE7g7-RTT105-NRg-4	0.0661967	0.802273	0.0688362	0.468672
PRE7g7-VMA5-TRg-3	0.084909	1.04178	0.0871505	0.696469
PRE7g7-VMA5-TRg-5	0.0172298	0.175524	0.0204843	0.878427
PRE7g7-RRP1-TRg-3	-0.0637995	-0.861607	-0.0607326	0.71623
PRE7g7-CLC1-TRg-2	-0.00608469	-0.122889	-0.00622468	0.937724
PRE7g7-GCD6-NRg-1	NA	NA	NA	NA
PRE7g7-GCD6-NRg-2	0.0451348	0.532693	0.0460356	0.890847
PRE7g7-PXR1-TRg-1	-0.118928	-1.56722	-0.115638	0.329104
PRE7g7-CDC14-NRg-1	-0.0904209	-1.20234	-0.0887786	0.654
PRE7g7-PCF11-TRg-6	NA	NA	NA	NA
PRE7g7-PCF11-TRg-5	NA	NA	NA	NA
PRE7g7-PCF11-TRg-4	NA	NA	NA	NA
PRE7g7-SEC31-NRg-1	NA	NA	NA	NA
PRE7g7-RRP5-NRg-1	-0.0245924	-0.359777	-0.0220613	0.867235
PRE7g7-PRE10-TRg-5	NA	NA	NA	NA
PRE7g7-PRE10-TRg-1	NA	NA	NA	NA
PRE7g7-RPS5-TRg-2	-0.0774671	-1.03654	-0.0757711	0.608175
PRE7g7-NSP1-TRg-4	0.063357	0.765926	0.0645391	0.39126
PRE7g7-PRP38-TRg-4	-0.109645	-1.4484	-0.107646	0.269466
PRE7g7-RCF1-NRg-5	-0.0408067	-0.567312	-0.0375763	0.22864
PRE7g7-RSC3-TRg-4	0.0151457	0.148848	0.0172705	0.973302
PRE7g7-RSC3-TRg-5	-0.0288334	-0.41406	-0.0270761	0.820503
PRE7g7-RSC3-TRg-6	-0.0240937	-0.353394	-0.0207996	0.871078
PRE7g7-HTA1-NRg-12	NA	NA	NA	NA
PRE7g7-HTA1-NRg-11	0.10413	1.28779	0.108943	0.214713
PRE7g7-UTP23-TRg-2	0.0659771	0.799462	0.0693817	0.757412
PRE7g7-GCD7-NRg-1	-0.0738215	-0.989882	-0.0733741	0.526142
PRE7g7-GCD7-NRg-2	NA	NA	NA	NA
PRE7g7-GCD7-NRg-6	-0.0389849	-0.543994	-0.0364439	0.761351
PRE7g7-GAL11-NRg-2	NA	NA	NA	NA
PRE7g7-GAL11-NRg-9	NA	NA	NA	NA
PRE7g7-PHO4-TRg-5	0.0365463	0.422764	0.0392422	0.910987
PRE7g7-SNP1-NRg-3	-0.00345445	-0.089223	0.000211508	0.950671
PRE7g7-RPC37-TRg-5	0.170472	2.13694	0.172499	0.491359
PRE7g7-CRM1-TRg-5	NA	NA	NA	NA
PRE7g7-CRM1-TRg-2	NA	NA	NA	NA
PRE7g7-ASK1-TRg-7	0.10077	1.24479	0.0972207	0.660662
PRE7g7-STU2-NRg-4	0.0458154	0.541403	0.0458271	0.504761
PRE7g7-NEO1-NRg-3	-0.12933	-1.70036	-0.127902	0.498712
PRE7g7-GAL11-TRg-5	-0.093667	-1.24389	-0.0906574	0.563682
PRE7g7-GAL11-TRg-7	NA	NA	NA	NA
PRE7g7-SAM50-NRg-3	NA	NA	NA	NA
PRE7g7-CSL4-TRg-2	NA	NA	NA	NA
PRE7g7-CCT5-TRg-2	0.0923794	1.1374	0.0927936	0.503001
PRE7g7-POL30-NRg-1	-0.0205082	-0.307501	-0.0194016	0.922055
PRE7g7-MED4-TRg-4	-0.0234091	-0.344631	-0.0205593	0.872906
PRE7g7-MED4-TRg-3	0.0287669	0.323192	0.0307234	0.759934
PRE7g7-MED4-TRg-2	0.0520415	0.621095	0.0557088	0.67147
PRE7g7-GDI1-TRg-4	NA	NA	NA	NA
PRE7g7-GDI1-TRg-3	-0.0495938	-0.679781	-0.0456806	0.809599
PRE7g7-REB1-TRg-6	0.0656717	0.795553	0.0672928	0.706329
PRE7g7-MRPL37-NRg-2	0.0373827	0.433469	0.0414903	0.752022
PRE7g7-NOC3-TRg-3	0.0747258	0.911441	0.0785357	0.696232
PRE7g7-SPC97-TRg-3	0.00120131	-0.0296318	0.000701915	0.946875
PRE7g7-IPP1-TRg-3	0.0748134	0.912562	0.0767094	0.57637
PRE7g7-IPP1-TRg-2	0.0410281	0.480129	0.042762	0.909714
PRE7g7-PTI1-TRg-3	NA	NA	NA	NA
PRE7g7-PTI1-TRg-5	NA	NA	NA	NA
PRE7g7-RFC5-NRg-1	0.134671	1.6787	0.13784	0.383573
PRE7g7-CDC24-TRg-1	NA	NA	NA	NA
PRE7g7-CDC24-TRg-3	NA	NA	NA	NA
PRE7g7-CDC24-TRg-5	NA	NA	NA	NA
PRE7g7-CDC24-TRg-6	NA	NA	NA	NA
PRE7g7-UTP23-TRg-6	-0.0934945	-1.24169	-0.0894936	0.657313
PRE7g7-UTP23-TRg-4	0.0913495	1.12421	0.0946726	0.550538
PRE7g7-UTP23-TRg-1	NA	NA	NA	NA
PRE7g7-RHO3-NRg-4	NA	NA	NA	NA
PRE7g7-TRS23-NRg-1	0.133273	1.66081	0.133336	0.560021
PRE7g7-TRS23-NRg-3	-0.0384059	-0.536582	-0.0350572	0.809997
PRE7g7-RSP5-TRg-2	NA	NA	NA	NA
PRE7g7-RSP5-TRg-1	-0.0640632	-0.864982	-0.061454	0.847859
PRE7g7-SDA1-NRg-1	-0.11036	-1.45755	-0.108315	0.554827
PRE7g7-KAP95-TRg-8	0.00829674	0.0611857	0.0106278	0.992202
PRE7g7-ACO1-TRg-6	NA	NA	NA	NA
PRE7g7-HTA1-NRg-3	NA	NA	NA	NA
PRE7g7-HTA1-NRg-2	0.0734019	0.894496	0.0761285	0.789452
PRE7g7-SPN1-TRg-1	0.166338	2.08403	0.167549	0.219436
PRE7g7-MOT1-NRg-7	-0.0784835	-1.04955	-0.0771109	0.775409
PRE7g7-RPL17A-NRg-4	-0.0454972	-0.627347	-0.0424604	0.793491
PRE7g7-ADA2-TRg-4	-0.0677532	-0.912212	-0.0633452	0.39972
PRE7g7-SFH1-NRg-1	NA	NA	NA	NA
PRE7g7-SPC97-NRg-5	0.013731	0.130741	0.0118753	0.983128
PRE7g7-PRP22-TRg-3	NA	NA	NA	NA
PRE7g7-SEN15-TRg-2	0.122897	1.528	0.126193	0.745834
PRE7g7-RPL3-NRg-2	NA	NA	NA	NA
PRE7g7-ISD11-NRg-2	NA	NA	NA	NA
PRE7g7-HEM12-TRg-8	NA	NA	NA	NA
PRE7g7-SEC10-TRg-1	-0.0803869	-1.07392	-0.0806413	0.426207
PRE7g7-HTB1-TRg-7	0.0742441	0.905275	0.0785545	0.589788
PRE7g7-TTI2-TRg-1	NA	NA	NA	NA
PRE7g7-ACP1-TRg-2	NA	NA	NA	NA
PRE7g7-ACP1-TRg-4	-0.0667623	-0.899529	-0.0660665	0.636314
PRE7g7-GAL11-NRg-10	NA	NA	NA	NA
PRE7g7-UTP22-TRg-2	0.166653	2.08806	0.170699	0.465373
PRE7g7-MST1-NRg-5	NA	NA	NA	NA
PRE7g7-RIB7-NRg-2	-0.0224469	-0.332316	-0.0193574	0.892088
PRE7g7-MCD1-TRg-6	0.0272915	0.304308	0.0306086	0.917495
PRE7g7-MCD1-TRg-5	-0.14688	-1.92499	-0.143329	0.544654
PRE7g7-GPI8-NRg-2	NA	NA	NA	NA
PRE7g7-THS1-TRg-2	NA	NA	NA	NA
PRE7g7-RRP7-TRg-2	NA	NA	NA	NA
PRE7g7-RRP7-TRg-5	-0.0953824	-1.26585	-0.0948752	0.693557
PRE7g7-SMX2-NRg-7	-0.0559239	-0.760803	-0.0528574	0.778297
PRE7g7-RRP45-TRg-5	NA	NA	NA	NA
PRE7g7-RRP45-TRg-4	NA	NA	NA	NA
PRE7g7-CNS1-TRg-2	-0.0276412	-0.398799	-0.0236821	0.820575
PRE7g7-FBP1-NRg-9	NA	NA	NA	NA
PRE7g7-GCD11-NRg-1	-0.00165275	-0.0661622	-0.00213049	0.940883
PRE7g7-RPL10-TRg-2	NA	NA	NA	NA
PRE7g7-NUP192-TRg-4	NA	NA	NA	NA
PRE7g7-NUP145-NRg-4	0.209465	2.63603	0.212852	0.327596
PRE7g7-HEM12-TRg-6	0.0117981	0.106001	0.0165574	0.967431
PRE7g7-PLC1-TRg-3	NA	NA	NA	NA
PRE7g7-RPA43-TRg-1	0.0154794	0.15312	0.0179759	0.8892
PRE7g7-RPB7-NRg-2	-0.0711583	-0.955794	-0.0707602	0.689697
PRE7g7-RPB7-NRg-3	NA	NA	NA	NA
PRE7g7-NSL1-NRg-1	NA	NA	NA	NA
PRE7g7-UTP6-TRg-3	0.0424626	0.49849	0.0453751	0.737749
PRE7g7-UTP6-TRg-1	-0.0169926	-0.262503	-0.0149331	0.903319
PRE7g7-YJU2-TRg-5	-0.0978476	-1.2974	-0.0963995	0.608175
PRE7g7-FRS2-NRg-5	NA	NA	NA	NA
PRE7g7-TIF35-NRg-2	NA	NA	NA	NA
PRE7g7-GPI15-TRg-1	-0.0425992	-0.590254	-0.0397502	0.795024
PRE7g7-NOP1-NRg-5	-0.0523405	-0.714937	-0.0497783	0.87148
PRE7g7-GPI15-TRg-4	0.0190529	0.198858	0.0240728	0.866743
PRE7g7-COG4-TRg-1	0.0603537	0.727485	0.0615434	0.790473
PRE7g7-TFA1-TRg-1	NA	NA	NA	NA
PRE7g7-RHO1-NRg-2	NA	NA	NA	NA
PRE7g7-RHO1-NRg-1	NA	NA	NA	NA
PRE7g7-CDC55-NRg-2	-0.0278724	-0.401759	-0.026323	0.775001
PRE7g7-IDI1-NRg-7	-0.0841114	-1.12159	-0.0799944	0.498778
PRE7g7-RPL32-TRg-5	NA	NA	NA	NA
PRE7g7-RPB5-TRg-4	0.00873938	0.0668511	0.0097516	0.99334
PRE7g7-DIP2-TRg-5	NA	NA	NA	NA
PRE7g7-DIP2-TRg-1	-0.0938387	-1.24609	-0.091516	0.51023
PRE7g7-RPC40-TRg-2	0.0811572	0.993759	0.0841517	0.703234
PRE7g7-CDC6-TRg-5	-0.0957059	-1.26999	-0.0921896	0.684662
PRE7g7-CDC6-TRg-3	0.000105839	-0.0436533	0.00108778	0.970063
PRE7g7-DAD2-TRg-2	NA	NA	NA	NA
PRE7g7-RVS161-TRg-2	NA	NA	NA	NA
PRE7g7-RVS161-TRg-1	NA	NA	NA	NA
PRE7g7-SUP45-NRg-3	0.103001	1.27335	0.103278	0.551331
PRE7g7-SRB6-NRg-5	0.0251475	0.276867	0.026465	0.929238
PRE7g7-RPC11-TRg-4	-0.065763	-0.886737	-0.0636727	0.707197
PRE7g7-RKI1-TRg-8	0.113549	1.40836	0.117324	0.494589
PRE7g7-NIP7-TRg-3	0.00659827	0.0394462	0.0095998	0.996577
PRE7g7-RPL33A-NRg-12	NA	NA	NA	NA
PRE7g7-SAM50-TRg-4	NA	NA	NA	NA
PRE7g7-NOP4-NRg-1	0.066273	0.80325	0.0702947	0.452119
PRE7g7-NOP4-NRg-3	NA	NA	NA	NA
PRE7g7-SMX2-TRg-5	0.151901	1.89924	0.155229	0.439022
PRE7g7-POL12-NRg-2	-0.02494	-0.364226	-0.0226281	0.498943
PRE7g7-BMS1-NRg-2	-0.0604456	-0.818679	-0.0565242	0.756867
PRE7g7-RPA190-TRg-5	0.0134277	0.12686	0.0170227	0.934665
PRE7g7-ALG14-NRg-4	0.0234389	0.254996	0.0272012	0.833298
PRE7g7-ALG14-NRg-1	-0.112631	-1.48663	-0.109004	0.47999
PRE7g7-PRE5-NRg-1	NA	NA	NA	NA
PRE7g7-BIG1-NRg-2	0.0636776	0.77003	0.0661206	0.740543
PRE7g7-TFA2-TRg-4	NA	NA	NA	NA
PRE7g7-IMP4-TRg-6	NA	NA	NA	NA
PRE7g7-PAN1-NRg-1	-0.0148447	-0.235012	-0.0158424	0.893948
PRE7g7-UTP13-TRg-2	NA	NA	NA	NA
PRE7g7-KAE1-NRg-3	-0.0508652	-0.696054	-0.0479247	0.762616
PRE7g7-ERG20-TRg-1	0.0384702	0.447389	0.0413989	0.758623
PRE7g7-CDC20-TRg-6	NA	NA	NA	NA
PRE7g7-PWP2-NRg-2	0.0665664	0.807005	0.0703342	0.397644
PRE7g7-COG1-NRg-1	NA	NA	NA	NA
PRE7g7-RPL1B-TRg-4	-0.136373	-1.79051	-0.134606	0.471968
PRE7g7-RPL1B-TRg-7	0.0268022	0.298046	0.0293662	0.927106
PRE7g7-UTP20-TRg-3	0.143623	1.79329	0.146109	0.655649
PRE7g7-UTP20-TRg-4	-0.00203649	-0.0710739	0.000367412	0.950046
PRE7g7-RPL25-TRg-4	NA	NA	NA	NA
PRE7g7-RPL25-TRg-2	NA	NA	NA	NA
PRE7g7-MCM7-NRg-1	NA	NA	NA	NA
PRE7g7-MRP49-TRg-5	NA	NA	NA	NA
PRE7g7-ERO1-NRg-3	NA	NA	NA	NA
PRE7g7-UTP5-TRg-7	-0.0323873	-0.459547	-0.0291513	0.835134
PRE7g7-MCM4-NRg-1	0.202225	2.54336	0.203201	0.468742
PRE7g7-PRE3-NRg-1	NA	NA	NA	NA
PRE7g7-FCF1-NRg-1	NA	NA	NA	NA
PRE7g7-CUS1-NRg-1	0.139041	1.73464	0.140726	0.589033
PRE7g7-PSF1-TRg-2	-0.0289956	-0.416136	-0.0270377	0.924006
PRE7g7-BCP1-TRg-2	0.0449263	0.530024	0.0485167	0.773561
PRE7g7-PAN1-TRg-1	0.0824668	1.01052	0.0818284	0.572947
PRE7g7-PAN1-TRg-3	NA	NA	NA	NA
PRE7g7-PAN1-TRg-4	0.013931	0.133301	0.0136985	0.937394
PRE7g7-VPS3-TRg-2	NA	NA	NA	NA
PRE7g7-YIL060W-NRg-1	NA	NA	NA	NA
PRE7g7-VPS53-NRg-1	NA	NA	NA	NA
PRE7g7-CYR1-TRg-4	NA	NA	NA	NA
PRE7g7-CYR1-TRg-7	NA	NA	NA	NA
PRE7g7-MPS1-NRg-1	NA	NA	NA	NA
PRE7g7-SRP1-TRg-5	NA	NA	NA	NA
PRE7g7-SRP1-TRg-4	NA	NA	NA	NA
PRE7g7-TAF12-TRg-2	NA	NA	NA	NA
PRE7g7-TAF12-TRg-3	NA	NA	NA	NA
PRE7g7-POP4-TRg-1	-0.0590006	-0.800183	-0.0569561	0.75496
PRE7g7-SPT16-TRg-1	NA	NA	NA	NA
PRE7g7-NUP82-TRg-4	NA	NA	NA	NA
PRE7g7-DML1-TRg-3	-0.107191	-1.41699	-0.103313	0.412065
PRE7g7-RPA43-NRg-3	0.0214246	0.229215	0.0239724	0.912753
PRE7g7-STU2-NRg-3	-0.0434149	-0.600695	-0.0429302	0.749412
PRE7g7-POP4-NRg-4	-0.0155406	-0.243919	-0.0119563	0.910123
PRE7g7-MCD1-TRg-2	NA	NA	NA	NA
PRE7g7-RPS3-NRg-4	-0.0595044	-0.806631	-0.0571926	0.339406
PRE7g7-PRP9-TRg-4	NA	NA	NA	NA
PRE7g7-RPP1-NRg-2	NA	NA	NA	NA
PRE7g7-MTR2-NRg-11	NA	NA	NA	NA
PRE7g7-GCD11-TRg-1	-0.154572	-2.02345	-0.154647	0.518478
PRE7g7-RPF1-TRg-3	NA	NA	NA	NA
PRE7g7-SUB2-NRg-4	NA	NA	NA	NA
PRE7g7-GPI15-TRg-3	0.192862	2.42352	0.19558	0.360688
PRE7g7-ERG9-TRg-6	NA	NA	NA	NA
PRE7g7-RPT2-NRg-1	NA	NA	NA	NA
PRE7g7-YOS1-NRg-3	NA	NA	NA	NA
PRE7g7-SCM3-TRg-4	0.0450244	0.53128	0.0493306	0.777942
PRE7g7-SCM3-TRg-6	0.0661421	0.801574	0.0702445	0.310608
PRE7g7-RLP7-NRg-1	NA	NA	NA	NA
PRE7g7-TFB2-NRg-4	NA	NA	NA	NA
PRE7g7-IMP4-TRg-1	0.0261675	0.289921	0.0294662	0.865437
PRE7g7-IMP4-TRg-3	-0.103952	-1.37553	-0.100341	0.310562
PRE7g7-PRE4-TRg-3	NA	NA	NA	NA
PRE7g7-SUB2-TRg-3	-0.0624393	-0.844196	-0.0624285	0.412443
PRE7g7-RPP0-NRg-4	-0.0305785	-0.436396	-0.0293205	0.6859
PRE7g7-RPP0-NRg-3	NA	NA	NA	NA
PRE7g7-TOM40-TRg-4	0.104729	1.29546	0.106932	0.503084
PRE7g7-FUR1-NRg-12	-0.0758159	-1.01541	-0.0715643	0.712611
PRE7g7-TOM40-TRg-2	0.0197937	0.20834	0.0205697	0.916825
PRE7g7-VMA11-NRg-4	-0.0269746	-0.390268	-0.0220155	0.819763
PRE7g7-PGS1-NRg-4	NA	NA	NA	NA
PRE7g7-URB1-TRg-4	-0.0540006	-0.736186	-0.0500961	0.589715
PRE7g7-ARP4-TRg-3	-0.0200507	-0.301646	-0.0192898	0.66545
PRE7g7-RPT3-TRg-3	NA	NA	NA	NA
PRE7g7-SUI3-TRg-3	-0.0432551	-0.598649	-0.0432183	0.779938
PRE7g7-RFC5-NRg-2	NA	NA	NA	NA
PRE7g7-RRP14-TRg-2	0.263747	3.33081	0.265448	0.376633
PRE7g7-SCC2-TRg-1	NA	NA	NA	NA
PRE7g7-SSC1-TRg-3	NA	NA	NA	NA
PRE7g7-RRP9-TRg-3	-0.0486585	-0.667809	-0.0448136	0.509334
PRE7g7-MOT1-NRg-9	NA	NA	NA	NA
PRE7g7-RPL42A-NRg-2	NA	NA	NA	NA
PRE7g7-SEC16-TRg-7	0.167049	2.09313	0.166962	0.436697
PRE7g7-IMP4-NRg-2	0.0374398	0.434201	0.039961	0.906952
PRE7g7-YEF3-NRg-4	NA	NA	NA	NA
PRE7g7-PUP1-TRg-1	-0.113917	-1.50309	-0.11384	0.37464
PRE7g7-UTP22-TRg-6	0.00684115	0.0425549	0.0111422	0.971735
PRE7g7-DBP2-NRg-4	0.00273355	-0.0100201	0.00578409	0.991784
PRE7g7-PRE2-TRg-7	0.079526	0.972881	0.0838627	0.401633
PRE7g7-ATP16-TRg-6	NA	NA	NA	NA
PRE7g7-UTP13-TRg-4	0.0246509	0.27051	0.0268902	0.950321
PRE7g7-DOP1-NRg-4	NA	NA	NA	NA
PRE7g7-TIM44-TRg-3	-0.124039	-1.63264	-0.12284	0.411233
PRE7g7-ATP16-TRg-2	NA	NA	NA	NA
PRE7g7-ENP1-NRg-3	NA	NA	NA	NA
PRE7g7-NAF1-TRg-3	NA	NA	NA	NA
PRE7g7-COG4-TRg-2	NA	NA	NA	NA
PRE7g7-SOG2-TRg-7	NA	NA	NA	NA
PRE7g7-YDR341C-TRg-3	-0.051989	-0.710438	-0.0512497	0.725125
PRE7g7-YMR290W-A-TRg-10	-0.0618837	-0.837084	-0.0588933	0.61849
PRE7g7-NUP192-NRg-9	0.0614977	0.742129	0.0631739	0.768184
PRE7g7-RPS31-NRg-8	NA	NA	NA	NA
PRE7g7-SPC97-NRg-6	NA	NA	NA	NA
PRE7g7-EBP2-NRg-1	-0.0695857	-0.935666	-0.0671611	0.631994
PRE7g7-CDC48-TRg-5	NA	NA	NA	NA
PRE7g7-RPT1-TRg-4	-0.0293039	-0.420082	-0.0285575	0.439022
PRE7g7-ULP1-NRg-2	NA	NA	NA	NA
PRE7g7-RPN3-TRg-6	-0.0310616	-0.442579	-0.0304822	0.855363
PRE7g7-RPT1-TRg-5	-0.170446	-2.22663	-0.169282	0.414801
PRE7g7-KRE5-TRg-2	0.0176055	0.180333	0.0214402	0.953759
PRE7g7-TBF1-NRg-8	0.0988514	1.22023	0.102024	0.437695
PRE7g7-UTP22-NRg-4	0.0858364	1.05365	0.0903819	0.695263
PRE7g7-SSC1-NRg-4	-0.122111	-1.60796	-0.121818	0.512576
PRE7g7-REB1-TRg-4	0.146656	1.8321	0.14734	0.575387
PRE7g7-CDC48-NRg-9	NA	NA	NA	NA
PRE7g7-FAS2-TRg-8	0.0884195	1.08671	0.0890519	0.644292
PRE7g7-TAO3-TRg-8	NA	NA	NA	NA
PRE7g7-CKS1-TRg-5	NA	NA	NA	NA
PRE7g7-YLR379W-TRg-7	0.206083	2.59274	0.209843	0.238851
PRE7g7-TEN1-NRg-2	0.0487955	0.579547	0.0498583	0.68459
PRE7g7-RPL42A-TRg-2	-0.104846	-1.38698	-0.101151	0.468858
PRE7g7-SEC27-TRg-4	NA	NA	NA	NA
PRE7g7-TBF1-NRg-4	0.0595668	0.717414	0.0621757	0.722845
PRE7g7-RPT1-NRg-6	NA	NA	NA	NA
PRE7g7-COG1-TRg-3	NA	NA	NA	NA
PRE7g7-SUI1-TRg-6	-0.0245344	-0.359035	-0.0216171	0.778287
PRE7g7-TIM23-TRg-6	NA	NA	NA	NA
PRE7g7-CDC48-NRg-6	0.168035	2.10575	0.169413	0.475232
PRE7g7-EPL1-TRg-5	NA	NA	NA	NA
PRE7g7-RPT5-TRg-8	0.0584925	0.703663	0.0600153	0.73237
PRE7g7-ATP16-NRg-4	NA	NA	NA	NA
PRE7g7-RPN6-TRg-3	NA	NA	NA	NA
PRE7g7-ERG9-NRg-6	-0.177253	-2.31375	-0.174212	0.231487
PRE7g7-SMX3-TRg-1	NA	NA	NA	NA
PRE7g7-NCB2-NRg-3	NA	NA	NA	NA
PRE7g7-SEC16-NRg-12	-0.0765628	-1.02497	-0.0743436	0.707238
PRE7g7-RPN6-TRg-2	-0.0301153	-0.430467	-0.0292148	0.653178
PRE7g7-REB1-NRg-4	0.3939	4.99669	0.394863	0.355035
PRE7g7-ATP16-TRg-9	NA	NA	NA	NA
PRE7g7-ERG9-NRg-7	0.108798	1.34754	0.112596	0.557623
PRE4g9-RPL15A-NRg-4	0.0603162	0.727006	0.0598593	0.630518
PRE4g9-RPL15A-NRg-5	0.00144706	-0.0264864	0.00129352	0.978556
PRE4g9-KRE33-TRg-1	0.0471877	0.558969	0.0487513	0.513272
PRE4g9-PMI40-NRg-1	-0.0334179	-0.472739	-0.0317024	0.82831
PRE4g9-NOP19-NRg-3	0.00369301	0.00226046	0.0057232	0.982962
PRE4g9-SRP14-NRg-4	0.0339671	0.389752	0.0354871	0.820291
PRE4g9-SEC27-TRg-2	0.0138516	0.132284	0.0112	0.975452
PRE4g9-GPI14-TRg-3	0.0421179	0.494078	0.0445831	0.699147
PRE4g9-PAH1-TRg-7	-0.0342199	-0.483003	-0.0341635	0.577045
PRE4g9-PAH1-TRg-6	-0.0391715	-0.546381	-0.0393208	0.696256
PRE4g9-PAH1-TRg-5	0.0106602	0.0914373	0.0100716	0.990944
PRE4g9-PAH1-TRg-3	-0.0828624	-1.1056	-0.0831668	0.320176
PRE4g9-COG3-TRg-1	0.106096	1.31297	0.106135	0.44235
PRE4g9-HTS1-NRg-5	0.0170397	0.173091	0.0188833	0.879923
PRE4g9-MSN5-TRg-7	NA	NA	NA	NA
PRE4g9-ERG26-TRg-1	0.023136	0.251119	0.0230854	0.952262
PRE4g9-SMD2-TRg-5	-0.0176458	-0.270864	-0.0149942	0.663231
PRE4g9-SMD2-TRg-4	-0.0452761	-0.624516	-0.0427276	0.687948
PRE4g9-SMD2-TRg-1	0.15681	1.96208	0.156915	0.379697
PRE4g9-PRE7-TRg-4	-0.0711502	-0.95569	-0.0730729	0.666457
PRE4g9-PRE7-TRg-7	-0.0837709	-1.11723	-0.0838603	0.395023
PRE4g9-SEC6-TRg-3	-0.0249881	-0.364842	-0.024351	0.414693
PRE4g9-ESF2-NRg-1	0.0375484	0.435591	0.0392956	0.671306
PRE4g9-ESF2-NRg-3	0.0214827	0.229959	0.0230111	0.838746
PRE4g9-AFG2-TRg-2	0.0978918	1.20795	0.0991489	0.254001
PRE4g9-RRP36-TRg-3	0.0117322	0.105158	0.0124426	0.92636
PRE4g9-RRP36-TRg-5	0.0839143	1.02905	0.084531	0.479704
PRE4g9-GCR1-NRg-2	0.0216338	0.231892	0.0223597	0.870599
PRE4g9-PRE4-NRg-4	-0.323119	-4.18075	-0.323392	0.356898
PRE4g9-PRE4-NRg-9	-0.142609	-1.87032	-0.141048	0.336889
PRE4g9-DSN1-NRg-2	0.0741504	0.904076	0.0739893	0.149893
PRE4g9-GPI11-TRg-3	-0.0800889	-1.0701	-0.0778313	0.43198
PRE4g9-POP3-TRg-1	0.0958661	1.18202	0.0974958	0.468094
PRE4g9-MNE1-TRg-5	-0.383756	-4.95687	-0.383477	0.287752
PRE4g9-RRP12-NRg-1	0.0333407	0.381734	0.0347479	0.811296
PRE4g9-RSC6-TRg-2	-0.0021676	-0.072752	-0.000684446	0.880392
PRE4g9-CDC25-TRg-1	0.0501826	0.597301	0.0479697	0.689439
PRE4g9-CDC25-TRg-9	-0.00777478	-0.144521	-0.00954514	0.673444
PRE4g9-YPP1-NRg-3	-0.0501967	-0.687498	-0.0490304	0.664618
PRE4g9-NFS1-NRg-9	0.0172393	0.175645	0.0182253	0.904667
PRE4g9-NFS1-NRg-8	-0.0557363	-0.758402	-0.0547012	0.413824
PRE4g9-UBA2-TRg-1	-0.0399476	-0.556315	-0.0386346	0.623402
PRE4g9-ARP2-NRg-3	NA	NA	NA	NA
PRE4g9-MAK16-TRg-1	0.0792216	0.968985	0.0795	0.34328
PRE4g9-CEP3-NRg-1	-0.0330454	-0.467971	-0.0334656	0.581969
PRE4g9-GUK1-TRg-5	0.0204674	0.216964	0.0221788	0.895267
PRE4g9-GUK1-TRg-2	0.0911608	1.1218	0.0918571	0.365459
PRE4g9-GPI12-NRg-6	-0.0549345	-0.748139	-0.0530697	0.559347
PRE4g9-RPS5-NRg-5	-0.135955	-1.78515	-0.134535	0.305874
PRE4g9-RPS5-NRg-2	-0.020694	-0.30988	-0.0206005	0.777328
PRE4g9-RPC19-NRg-1	0.0568599	0.682768	0.0579808	0.466902
PRE4g9-TIM54-TRg-1	-0.0294203	-0.421572	-0.0281203	0.506171
PRE4g9-TEN1-TRg-2	0.0870945	1.06975	0.0869362	0.575921
PRE4g9-SAH1-NRg-4	-0.019051	-0.28885	-0.0186638	0.851124
PRE4g9-SAH1-NRg-5	-0.0280174	-0.403615	-0.0276938	0.65288
PRE4g9-SAH1-NRg-3	-0.024632	-0.360284	-0.0239245	0.818489
PRE4g9-ATP15-NRg-5	NA	NA	NA	NA
PRE4g9-SCD5-TRg-5	-0.00982763	-0.170796	-0.0127553	0.920082
PRE4g9-ARB1-NRg-2	0.0258988	0.286482	0.0259947	0.927406
PRE4g9-ARB1-NRg-4	0.0354522	0.408761	0.0373841	0.805579
PRE4g9-PUP2-TRg-1	NA	NA	NA	NA
PRE4g9-CCT8-TRg-2	NA	NA	NA	NA
PRE4g9-MCM4-TRg-1	0.0752645	0.918335	0.0743679	0.817044
PRE4g9-LSM4-TRg-1	-0.0487657	-0.669182	-0.0461419	0.476962
PRE4g9-NOP53-NRg-1	0.0169664	0.172153	0.016266	0.958839
PRE4g9-ATP3-TRg-4	NA	NA	NA	NA
PRE4g9-AFG2-NRg-3	0.0173777	0.177417	0.0201055	0.928662
PRE4g9-PRO3-NRg-3	-0.104051	-1.37681	-0.102637	0.415645
PRE4g9-NRD1-NRg-10	0.0240392	0.26268	0.0228449	0.607061
PRE4g9-SEC61-TRg-2	0.146007	1.82381	0.147095	0.31125
PRE4g9-RHO3-TRg-4	-0.0210456	-0.31438	-0.0193807	0.779926
PRE4g9-SNF2-TRg-6	-0.142263	-1.86589	-0.14152	0.639144
PRE4g9-SMD2-NRg-3	0.0315152	0.358369	0.0308592	0.834178
PRE4g9-RSC4-TRg-2	0.0979695	1.20895	0.0989805	0.526279
PRE4g9-RSC4-TRg-1	0.0508445	0.605774	0.0507528	0.873711
PRE4g9-TIF34-TRg-2	0.0332494	0.380566	0.0323684	0.83379
PRE4g9-BET1-NRg-1	0.0528405	0.631321	0.0521309	0.886296
PRE4g9-CDC8-NRg-2	0.00461836	0.0141044	0.00655268	0.986457
PRE4g9-PRP42-TRg-2	0.105024	1.29924	0.106614	0.346406
PRE4g9-RRB1-TRg-2	0.0581051	0.698704	0.0595534	0.60472
PRE4g9-SPC24-TRg-1	-0.0717201	-0.962985	-0.0735579	0.696018
PRE4g9-ILS1-NRg-1	0.189094	2.37529	0.189489	0.229661
PRE4g9-GFA1-TRg-2	-0.0423926	-0.58761	-0.0403092	0.771518
PRE4g9-SEC21-NRg-10	0.0288752	0.324579	0.0299068	0.891712
PRE4g9-RPC10-NRg-1	-0.0216354	-0.321929	-0.0226466	0.720341
PRE4g9-RPB10-TRg-3	0.0435142	0.511949	0.0423569	0.868962
PRE4g9-RPB10-TRg-2	0.0378889	0.439949	0.0364699	0.727866
PRE4g9-YNL181W-TRg-1	0.0135746	0.128739	0.0154254	0.799894
PRE4g9-RAD3-NRg-1	-0.118903	-1.5669	-0.117572	0.176574
PRE4g9-NOP10-TRg-1	0.0413073	0.483703	0.0423192	0.608025
PRE4g9-BFR2-TRg-3	0.0640368	0.774627	0.0655985	0.623084
PRE4g9-MCM2-TRg-6	-0.0431233	-0.596962	-0.0407306	0.666651
PRE4g9-MCM2-TRg-4	-0.019326	-0.29237	-0.0173489	0.605101
PRE4g9-MPP10-TRg-1	0.0513643	0.612426	0.0523949	0.697409
PRE4g9-RET2-TRg-4	-0.0335757	-0.474758	-0.0324087	0.34195
PRE4g9-RET2-TRg-1	0.175743	2.2044	0.174485	0.340388
PRE4g9-RPS2-NRg-1	-0.123104	-1.62067	-0.123413	0.448508
PRE4g9-RPS2-NRg-2	0.0651665	0.789086	0.0647672	0.568761
PRE4g9-ORC4-NRg-3	-0.0122536	-0.201847	-0.0107196	0.870938
PRE4g9-TIP20-TRg-7	-0.175315	-2.28894	-0.174209	0.315064
PRE4g9-SMT3-TRg-1	-0.0104871	-0.179236	-0.00930763	0.837147
PRE4g9-MSS18-NRg-6	-0.058487	-0.793609	-0.0569275	0.23813
PRE4g9-YEF3-NRg-9	NA	NA	NA	NA
PRE4g9-ASK1-NRg-1	0.167415	2.09781	0.165762	0.409062
PRE4g9-SMC1-TRg-1	0.0157543	0.156639	0.0159825	0.839834
PRE4g9-NIP1-NRg-1	0.0110704	0.0966871	0.0124896	0.891129
PRE4g9-RPP1-NRg-1	0.0103356	0.0872822	0.0112488	0.9679
PRE4g9-YDJ1-TRg-6	0.00803459	0.0578303	0.008662	0.986572
PRE4g9-SUB2-NRg-1	0.0179258	0.184433	0.0178413	0.479617
PRE4g9-TIM10-NRg-8	0.0950453	1.17152	0.0970563	0.335194
PRE4g9-TIM10-NRg-4	-0.0141108	-0.225618	-0.013008	0.355447
PRE4g9-TIM10-NRg-7	0.00312786	-0.00497308	0.00459427	0.961639
PRE4g9-SKI6-TRg-4	-0.150515	-1.97151	-0.148945	0.260237
PRE4g9-TUB4-TRg-1	0.194587	2.4456	0.192704	0.230417
PRE4g9-CDC37-NRg-2	0.0732719	0.892831	0.0737047	0.64219
PRE4g9-ISD11-TRg-3	-0.0725024	-0.972998	-0.0707839	0.446207
PRE4g9-YOS1-TRg-4	0.000568038	-0.0377374	-0.000116524	0.879676
PRE4g9-SSC1-TRg-6	-0.0226235	-0.334576	-0.0234994	0.355398
PRE4g9-MTR3-TRg-5	-0.131065	-1.72257	-0.130997	0.418682
PRE4g9-MTR3-TRg-6	-0.240512	-3.12343	-0.238973	0.214337
PRE4g9-TFA1-TRg-2	-0.0148918	-0.235614	-0.0152775	0.770652
PRE4g9-CDC3-NRg-3	-0.0969322	-1.28569	-0.0949274	0.429898
PRE4g9-ERG25-TA-18	NA	NA	NA	NA
PRE4g9-RPB11-TRg-4	-0.0557534	-0.758621	-0.054566	0.3111
PRE4g9-RPB11-TRg-1	0.000803425	-0.0347246	-0.000525013	0.923949
PRE4g9-RPB11-TRg-2	-0.0712207	-0.956593	-0.0719592	0.539956
PRE4g9-DED1-TRg-3	-0.0755329	-1.01179	-0.0749348	0.470625
PRE4g9-DED1-TRg-1	-0.0464668	-0.639757	-0.0452039	0.695107
PRE4g9-DED1-TRg-6	-0.0527268	-0.719881	-0.0525464	0.186598
PRE4g9-DED1-TRg-4	-0.0194273	-0.293666	-0.0186437	0.797735
PRE4g9-RPL10-NRg-5	-0.0536273	-0.731408	-0.0528131	0.582897
PRE4g9-RPL10-NRg-4	0.0463513	0.548262	0.0477838	0.715211
PRE4g9-EFB1-NRg-1	0.183234	2.30029	0.183879	0.247491
PRE4g9-EFB1-NRg-5	0.0917421	1.12924	0.0923955	0.418298
PRE4g9-EFB1-NRg-4	0.177328	2.22469	0.177365	0.211242
PRE4g9-RPT3-NRg-1	-0.0823231	-1.0987	-0.0828247	0.564273
PRE4g9-SAC6-TRg-8	-0.122196	-1.60905	-0.120057	0.293356
PRE4g9-SAC6-TRg-4	-0.209394	-2.72513	-0.207105	0.44235
PRE4g9-SAC6-TRg-5	-0.30355	-3.93027	-0.301637	0.134952
PRE4g9-SAC6-TRg-3	-0.100112	-1.32639	-0.0975283	0.507906
PRE4g9-DIM1-TRg-5	0.0701897	0.853381	0.0717849	0.628275
PRE4g9-DIM1-TRg-7	-0.0804436	-1.07464	-0.0780487	0.490438
PRE4g9-RPC17-NRg-1	0.0595469	0.71716	0.0602718	0.603574
PRE4g9-RPC17-NRg-2	0.0903059	1.11086	0.0909525	0.260537
PRE4g9-YDR341C-TRg-1	0.0779469	0.95267	0.0774994	0.280451
PRE4g9-RAP1-NRg-8	-0.0350018	-0.493012	-0.0319805	0.290833
PRE4g9-RAP1-NRg-5	0.0910137	1.11992	0.0899328	0.754455
PRE4g9-RAP1-NRg-2	0.14202	1.77277	0.141953	0.532152
PRE4g9-SEC26-NRg-3	-0.0137974	-0.221607	-0.0115796	0.597439
PRE4g9-SPP41-TRg-3	-0.0470999	-0.64786	-0.0467849	0.562729
PRE4g9-TAP42-NRg-1	0.113857	1.4123	0.114197	0.480956
PRE4g9-PGA2-TRg-6	0.0243893	0.267162	0.0262423	0.693148
PRE4g9-BRL1-TRg-1	-0.135713	-1.78206	-0.135671	0.432791
PRE4g9-FOL2-TRg-1	0.0675456	0.819538	0.0697887	0.361816
PRE4g9-NAB3-NRg-5	0.0295664	0.333426	0.031518	0.677126
PRE4g9-SNF4-TRg-4	-0.0329549	-0.466812	-0.0331752	0.830929
PRE4g9-HRR25-TRg-2	-0.107917	-1.42628	-0.107631	0.496237
PRE4g9-TRS23-TRg-4	-0.117964	-1.55488	-0.118893	0.380769
PRE4g9-CTR86-TRg-4	-0.0552323	-0.75195	-0.0534231	0.365173
PRE4g9-RPB5-TRg-5	0.00312351	-0.0050288	0.00214348	0.984233
PRE4g9-SPN1-NRg-2	-0.0674234	-0.90799	-0.0678305	0.550948
PRE4g9-SPN1-NRg-1	-0.0472974	-0.650388	-0.0481297	0.647379
PRE4g9-SEC61-NRg-1	0.015094	0.148186	0.0159185	0.949285
PRE4g9-SEC61-NRg-7	-0.0848674	-1.13126	-0.0845986	0.386736
PRE4g9-TUS1-TRg-3	0.020289	0.21468	0.0214617	0.812063
PRE4g9-OLE1-NRg-2	0.0845097	1.03667	0.0840058	0.261854
PRE4g9-AFG2-TRg-1	0.0282836	0.317006	0.0271696	0.728184
PRE4g9-TOA2-NRg-1	0.0742007	0.90472	0.0731499	0.639144
PRE4g9-USO1-TRg-1	0.0763405	0.932108	0.0757702	0.280765
PRE4g9-UTP22-NRg-2	0.0648728	0.785327	0.0662656	0.569724
PRE4g9-RIB1-TRg-3	-0.104698	-1.38509	-0.105906	0.646764
PRE4g9-RIB1-TRg-7	0.0382871	0.445046	0.0369583	0.866899
PRE4g9-RIB1-TRg-4	0.00960971	0.077991	0.00692596	0.988393
PRE4g9-COG1-TRg-1	-0.0998204	-1.32265	-0.101098	0.381783
PRE4g9-RPL32-NRg-2	0.0377453	0.438111	0.0384501	0.369576
PRE4g9-GLC7-NRg-3	-0.0941587	-1.25019	-0.0923172	0.374569
PRE4g9-GLC7-NRg-4	-0.021055	-0.3145	-0.0218195	0.523139
PRE4g9-HSF1-TRg-2	0.186456	2.34152	0.188265	0.193074
PRE4g9-DAM1-NRg-5	0.196157	2.46569	0.196205	0.232188
PRE4g9-SEC18-TRg-4	-0.00331589	-0.0874495	-0.00281913	0.939358
PRE4g9-SEC18-TRg-5	-0.0900532	-1.19764	-0.0887983	0.545836
PRE4g9-PAB1-NRg-3	-0.0437122	-0.604499	-0.0446196	0.746639
PRE4g9-POP8-TRg-2	-0.0465906	-0.641342	-0.0455618	0.193074
PRE4g9-PAB1-NRg-4	-0.0545431	-0.743129	-0.0554314	0.115666
PRE4g9-BIG1-TRg-4	0.00495727	0.0184422	0.0045897	0.967872
PRE4g9-BIG1-TRg-5	0.0184036	0.190547	0.0190506	0.863985
PRE4g9-BIG1-TRg-6	0.12369	1.53815	0.124283	0.329742
PRE4g9-RPO41-NRg-1	-0.0502469	-0.68814	-0.0508128	0.734646
PRE4g9-RVB2-NRg-2	0.0343925	0.395196	0.0361311	0.769844
PRE4g9-PET117-NRg-8	NA	NA	NA	NA
PRE4g9-VPS45-NRg-9	-0.0219983	-0.326574	-0.0211418	0.737949
PRE4g9-YCG1-NRg-1	0.0288913	0.324785	0.0277294	0.796412
PRE4g9-NOC4-NRg-1	0.0816407	0.999948	0.0826003	0.620123
PRE4g9-NMD3-NRg-2	0.0863671	1.06044	0.0880336	0.49847
PRE4g9-DRS1-TRg-2	0.108911	1.34899	0.110784	0.503604
PRE4g9-HTB1-NRg-2	0.105191	1.30138	0.105872	0.2662
PRE4g9-IPI1-TRg-2	0.0824352	1.01012	0.083003	0.418676
PRE4g9-SEC18-NRg-1	-0.112387	-1.4835	-0.114057	0.541698
PRE4g9-SEC18-NRg-2	-0.0626812	-0.847293	-0.0648142	0.581659
PRE4g9-JIP5-NRg-2	0.0986493	1.21765	0.100443	0.551298
PRE4g9-YPT1-TRg-3	-0.0877888	-1.16866	-0.0895986	0.793965
PRE4g9-YPT1-TRg-2	NA	NA	NA	NA
PRE4g9-CLF1-NRg-2	NA	NA	NA	NA
PRE4g9-SNF2-NRg-7	0.0209027	0.222536	0.0227608	0.817406
PRE4g9-SNF2-NRg-4	-0.114782	-1.51416	-0.112257	0.180435
PRE4g9-RPL25-NRg-1	-0.060943	-0.825044	-0.0611326	0.289862
PRE4g9-NOP56-TRg-1	0.0791859	0.968527	0.0813114	0.669008
PRE4g9-NOP56-TRg-2	0.103315	1.27736	0.10405	0.501972
PRE4g9-TRS31-TRg-1	0.065222	0.789797	0.0636076	0.697134
PRE4g9-DBF4-TRg-2	0.0433124	0.509366	0.041358	0.553627
PRE4g9-DBF4-TRg-1	0.0977596	1.20626	0.0956369	0.786539
PRE4g9-RPC19-TRg-4	0.107341	1.32889	0.108199	0.322117
PRE4g9-RPC19-TRg-6	0.075341	0.919315	0.0770028	0.58583
PRE4g9-RPC19-TRg-3	0.0421552	0.494555	0.0428018	0.811147
PRE4g9-ROK1-NRg-1	-0.0614537	-0.831581	-0.0598555	0.232121
PRE4g9-CDC33-TRg-4	0.0361685	0.417928	0.0368206	0.920393
PRE4g9-DHR2-TRg-3	-0.0377692	-0.528432	-0.0366766	0.411517
PRE4g9-RRP42-NRg-5	-0.0595578	-0.807315	-0.0576312	0.524374
PRE4g9-CLF1-TRg-1	0.12492	1.5539	0.122833	0.525488
PRE4g9-ERG11-NA-16	-0.0201908	-0.303439	-0.0193011	0.844826
PRE4g9-VAS1-NRg-4	-0.023502	-0.345821	-0.0240612	0.307301
PRE4g9-PIK1-NRg-2	0.0627922	0.758697	0.0636016	0.503835
PRE4g9-SAR1-NRg-7	-0.0926464	-1.23083	-0.0901013	0.399952
PRE4g9-SAR1-NRg-4	-0.123774	-1.62925	-0.123643	0.385111
PRE4g9-RPS3-TRg-1	-0.199203	-2.5947	-0.198867	0.201265
PRE4g9-YTM1-TRg-2	0.139661	1.74257	0.140784	0.380154
PRE4g9-SUI3-NRg-5	-0.0425024	-0.589015	-0.0416868	0.817043
PRE4g9-SUI3-NRg-2	-0.00227157	-0.0740829	-0.00111227	0.912258
PRE4g9-RRP7-TRg-4	0.0376712	0.437162	0.0396497	0.822791
PRE4g9-RRP7-TRg-6	0.0264141	0.293078	0.0261591	0.817949
PRE4g9-NIP7-TRg-2	0.0477978	0.566777	0.048967	0.430341
PRE4g9-MDM35-TRg-1	-0.0551373	-0.750734	-0.0537445	0.193074
PRE4g9-ALA1-NRg-1	0.228965	2.88561	0.229846	0.229138
PRE4g9-DOA4-NRg-2	-0.0805185	-1.0756	-0.0778662	0.424561
PRE4g9-RPS13-NRg-1	0.0510211	0.608033	0.0503132	0.255922
PRE4g9-YSF3-TRg-2	0.170707	2.13994	0.17147	0.369576
PRE4g9-RPS2-NRg-11	-0.199459	-2.59797	-0.198331	0.368613
PRE4g9-SSL1-TRg-10	-0.0921958	-1.22506	-0.0910626	0.376364
PRE4g9-NIP7-TRg-1	-0.00594418	-0.12109	-0.00425924	0.888755
PRE4g9-LST8-NRg-1	-0.00907346	-0.161143	-0.010415	0.8296
PRE4g9-TAF4-TRg-3	NA	NA	NA	NA
PRE4g9-HAS1-TRg-2	0.0463744	0.548559	0.0461932	0.61094
PRE4g9-GLC7-TRg-2	NA	NA	NA	NA
PRE4g9-CDC45-NRg-1	0.0414571	0.48562	0.0405524	0.474355
PRE4g9-SEC22-NRg-8	0.173903	2.18085	0.173042	0.152379
PRE4g9-YOS1-TRg-2	0.100283	1.23855	0.0988508	0.624706
PRE4g9-RBA50-TRg-3	-0.0335031	-0.473829	-0.0319384	0.48896
PRE4g9-SPP41-NRg-2	-0.0115971	-0.193444	-0.0107595	0.808662
PRE4g9-PRP46-TRg-2	0.0558779	0.670198	0.0550532	0.718827
PRE4g9-PGA2-NRg-1	0.141233	1.7627	0.141832	0.264889
PRE4g9-CBF5-TRg-3	0.0431393	0.50715	0.0453999	0.79888
PRE4g9-TCP1-NRg-3	-0.00338762	-0.0883676	-0.00119326	0.914387
PRE4g9-TCP1-NRg-2	0.0986137	1.21719	0.0985698	0.529801
PRE4g9-ERG26-NRg-2	0.00509225	0.0201699	0.00602488	0.979546
PRE4g9-ERG26-NRg-4	-0.147979	-1.93906	-0.147174	0.283796
PRE4g9-MES1-TRg-5	0.0378821	0.439861	0.038962	0.684139
PRE4g9-HTS1-TRg-2	0.0881378	1.08311	0.0884046	0.448012
PRE4g9-SSS1-TRg-3	0.0295924	0.333759	0.0302324	0.579193
PRE4g9-SSS1-TRg-2	0.0904859	1.11316	0.0915498	0.415187
PRE4g9-SYS1-TRg-7	-0.08055	-1.076	-0.0802572	0.525045
PRE4g9-SYS1-TRg-2	-0.130068	-1.7098	-0.130441	0.338564
PRE4g9-SYS1-TRg-1	-0.150341	-1.96929	-0.151935	0.444376
PRE4g9-BFR2-TRg-1	0.0101843	0.0853454	0.0114935	0.688917
PRE4g9-EOS1-TRg-3	-0.0561853	-0.764149	-0.0556999	0.476333
PRE4g9-TAF4-NRg-1	0.00165435	-0.0238333	-0.000180207	0.965137
PRE4g9-ARL3-NRg-8	0.107877	1.33576	0.107938	0.42552
PRE4g9-RPN5-NRg-1	0.0234845	0.255581	0.0238064	0.713113
PRE4g9-TIM9-NRg-2	-0.160003	-2.09295	-0.159115	0.371258
PRE4g9-NUP57-NRg-3	0.0924282	1.13802	0.0910551	0.580727
PRE4g9-VPS4-TRg-1	-0.00232778	-0.0748022	-0.00372025	0.918278
PRE4g9-CDC3-TRg-4	-0.12189	-1.60513	-0.119826	0.42069
PRE4g9-BBP1-NRg-1	-0.0921527	-1.22451	-0.0905008	0.445049
PRE4g9-BBP1-NRg-2	-0.0746051	-0.999911	-0.0730938	0.476333
PRE4g9-USE1-NRg-3	-0.130443	-1.71461	-0.128723	0.274668
PRE4g9-CCT7-TRg-1	0.263138	3.32301	0.263645	0.206374
PRE4g9-SAH1-TRg-3	-0.0956697	-1.26953	-0.0952085	0.381929
PRE4g9-CHS2-TRg-1	-0.0497225	-0.681429	-0.0487512	0.73722
PRE4g9-DPM1-TRg-2	0.0273941	0.305621	0.0290444	0.549446
PRE4g9-BBP1-TRg-1	0.00533276	0.0232484	0.00386766	0.98864
PRE4g9-NRD1-TRg-4	-0.0120604	-0.199375	-0.0118586	0.773694
PRE4g9-RPB3-NRg-1	-0.143749	-1.88492	-0.143764	0.488602
PRE4g9-PHO85-NRg-6	-0.247438	-3.21208	-0.247437	0.266008
PRE4g9-SNF6-TRg-6	-0.24353	-3.16206	-0.241622	0.217399
PRE4g9-PRP38-NRg-2	0.0654691	0.792961	0.0635283	0.760385
PRE4g9-OAR1-NRg-3	0.0718069	0.874081	0.072178	0.592254
PRE4g9-ROX3-NRg-1	0.0383979	0.446464	0.0408703	0.581508
PRE4g9-YPP1-TRg-6	0.0156566	0.155387	0.0162882	0.927598
PRE4g9-CBF2-NRg-8	0.00890319	0.0689479	0.0113439	0.947491
PRE4g9-SPT6-TRg-5	-0.205242	-2.67199	-0.204094	0.261854
PRE4g9-SEC10-NRg-1	0.0174933	0.178897	0.0154838	0.954867
PRE4g9-NSL1-NRg-3	-0.0328834	-0.465897	-0.0355204	0.649001
PRE4g9-NRD1-NRg-8	-0.0384535	-0.537192	-0.0382954	0.740029
PRE4g9-RPB3-TRg-1	-0.159138	-2.08188	-0.160118	0.203259
PRE4g9-NRD1-NRg-4	-0.0312613	-0.445135	-0.0314833	0.274517
PRE4g9-RVB1-TRg-2	-0.0521172	-0.712079	-0.0531752	0.679181
PRE4g9-TIF5-NRg-8	0.336266	4.25901	0.336377	0.295111
PRE4g9-EOS1-NRg-1	0.0375136	0.435145	0.0375505	0.754628
PRE4g9-ERG25-NA-26	-0.0410234	-0.570085	-0.0395507	0.557234
PRE4g9-MSL5-NRg-4	0.0558923	0.670383	0.0581168	0.32877
PRE4g9-SEC24-TRg-2	-0.0520373	-0.711057	-0.0543371	0.345954
PRE4g9-RPL30-NRg-5	0.062689	0.757376	0.0621101	0.681791
PRE4g9-SNU71-NRg-3	0.0770901	0.941703	0.0784467	0.423103
PRE4g9-CDC33-NRg-1	-0.0279674	-0.402976	-0.0268626	0.83129
PRE4g9-RPN6-TRg-4	0.0157144	0.156128	0.0160016	0.912791
PRE4g9-NAB2-TRg-4	-0.189863	-2.47515	-0.191461	0.360593
PRE4g9-NAB2-TRg-6	-0.0364988	-0.512172	-0.0366241	0.660657
PRE4g9-YTM1-NRg-1	0.0585236	0.704062	0.0596799	0.48323
PRE4g9-OLE1-TRg-8	-0.0823449	-1.09898	-0.0812963	0.255922
PRE4g9-OLE1-TRg-1	0.0894082	1.09937	0.0896485	0.37111
PRE4g9-UTP7-TRg-4	-0.054323	-0.740312	-0.0526445	0.380715
PRE4g9-ACT1-NRg-6	-0.127847	-1.68138	-0.130245	0.46819
PRE4g9-RPL18A-NRg-3	0.0605255	0.729684	0.0609284	0.491198
PRE4g9-BRX1-NRg-1	0.0726083	0.884337	0.0738317	0.498488
PRE4g9-NAF1-TRg-8	0.00033825	-0.0406786	0.0022838	0.957975
PRE4g9-NAF1-TRg-6	0.0667124	0.808874	0.0689123	0.430954
PRE4g9-NAF1-TRg-4	-0.0412633	-0.573156	-0.0394268	0.453557
PRE4g9-CDC8-TRg-2	-0.00423137	-0.0991672	-0.00197758	0.925501
PRE4g9-NSE4-TRg-1	0.0345212	0.396844	0.0357938	0.607125
PRE4g9-PAB1-NRg-2	0.0460021	0.543793	0.0448563	0.615783
PRE4g9-PRP43-TRg-4	0.0484236	0.574787	0.0482266	0.713295
PRE4g9-SEC2-NRg-3	0.0191746	0.200416	0.0209741	0.878048
PRE4g9-SEC2-NRg-6	-0.0109803	-0.185549	-0.00891534	0.707409
PRE4g9-MPP10-NRg-5	0.0328374	0.375292	0.0343842	0.602515
PRE4g9-YDR355C-TRg-2	0.130228	1.62183	0.128362	0.33167
PRE4g9-YLR339C-TRg-9	0.126303	1.5716	0.126089	0.527701
PRE4g9-SNM1-TRg-2	0.0838729	1.02852	0.0847486	0.38336
PRE4g9-ALR1-NRg-4	-0.188137	-2.45306	-0.187408	0.358073
PRE4g9-ALR1-NRg-1	0.0781131	0.954796	0.0774497	0.503604
PRE4g9-ALR1-NRg-3	-0.117192	-1.545	-0.116686	0.436623
PRE4g9-RPL10-TRg-1	0.140508	1.75342	0.141082	0.193001
PRE4g9-RPL28-TRg-2	0.0637797	0.771336	0.0639642	0.703832
PRE4g9-UTP25-TRg-1	0.0465482	0.550783	0.0476332	0.783413
PRE4g9-POB3-TRg-1	0.102411	1.2658	0.101326	0.360824
PRE4g9-POB3-TRg-3	-0.0333679	-0.472099	-0.0335606	0.717443
PRE4g9-POB3-TRg-2	0.0873596	1.07315	0.0867406	0.3642
PRE4g9-MED11-TRg-1	-0.0986538	-1.30772	-0.0983504	0.476948
PRE4g9-ISA1-TRg-15	NA	NA	NA	NA
PRE4g9-RRP1-NRg-1	0.122543	1.52347	0.124631	0.38849
PRE4g9-MES1-NRg-1	0.0393561	0.458728	0.0395696	0.694425
PRE4g9-SEC13-NRg-5	0.0552516	0.662181	0.0520302	0.81805
PRE4g9-MCM2-NRg-2	0.00426395	0.00956818	0.00413407	0.984653
PRE4g9-ALA1-TRg-4	-0.047366	-0.651266	-0.0484267	0.77894
PRE4g9-MTG2-TRg-5	0.0971766	1.1988	0.0954424	0.569762
PRE4g9-TIF35-NRg-3	0.0399895	0.466835	0.0417919	0.788251
PRE4g9-NSE1-TRg-3	0.0514056	0.612955	0.0531487	0.337453
PRE4g9-NSE1-TRg-4	0.0158727	0.158154	0.017245	0.962374
PRE4g9-MOB2-NRg-6	NA	NA	NA	NA
PRE4g9-VRG4-NRg-3	-0.107533	-1.42137	-0.108597	0.387068
PRE4g9-PRP9-TRg-3	0.0362598	0.419097	0.035605	0.615247
PRE4g9-HYM1-TRg-5	-0.102297	-1.35435	-0.102414	0.524402
PRE4g9-POP1-TRg-5	0.0896918	1.103	0.0902605	0.380314
PRE4g9-POP1-TRg-9	0.000216695	-0.0422344	0.00236548	0.976027
PRE4g9-RPL17A-TRg-1	0.105738	1.30838	0.106525	0.466711
PRE4g9-SLD2-TRg-1	-0.0186531	-0.283758	-0.0199798	0.560864
PRE4g9-CDC48-NRg-7	-0.0323845	-0.459511	-0.0300435	0.69909
PRE4g9-FHL1-NRg-2	-0.0545047	-0.742638	-0.0530834	0.432887
PRE4g9-BET3-NRg-7	-0.0251025	-0.366306	-0.0230551	0.423945
PRE4g9-MAK21-TRg-1	0.0368524	0.426682	0.038062	0.657731
PRE4g9-BRN1-TRg-4	0.018226	0.188275	0.0168666	0.888238
PRE4g9-FBA1-NRg-3	0.0164701	0.1658	0.018404	0.745072
PRE4g9-CDC42-TRg-6	-0.270842	-3.51163	-0.270159	0.459161
PRE4g9-CDC42-TRg-7	-0.0206979	-0.30993	-0.0216552	0.813487
PRE4g9-COG4-NRg-1	-0.0095478	-0.167215	-0.00766372	0.658702
PRE4g9-ATP3-NRg-3	NA	NA	NA	NA
PRE4g9-ATP3-NRg-2	NA	NA	NA	NA
PRE4g9-SMP3-TRg-5	-0.124546	-1.63913	-0.122632	0.444459
PRE4g9-CFT2-NRg-2	-0.0528612	-0.721601	-0.0538143	0.497055
PRE4g9-FAS2-TRg-5	0.07044	0.856585	0.0703665	0.577559
PRE4g9-DBP2-NRg-3	-0.0100624	-0.173801	-0.00865424	0.865437
PRE4g9-DBP2-NRg-2	0.046908	0.555388	0.0486692	0.788318
PRE4g9-MPS2-NRg-4	-0.00249271	-0.0769133	-0.00080802	0.910758
PRE4g9-ARC35-TRg-2	0.0336897	0.386202	0.0158397	0.973653
PRE4g9-ARC35-TRg-5	NA	NA	NA	NA
PRE4g9-MRD1-TRg-1	0.110812	1.37333	0.111554	0.432472
PRE4g9-RLP7-TRg-1	0.0414493	0.48552	0.0421178	0.739291
PRE4g9-SPC34-TRg-1	0.0732066	0.891996	0.0727757	0.804148
PRE4g9-CDC45-TRg-2	0.033569	0.384657	0.033879	0.727274
PRE4g9-GCD6-TRg-3	-0.00221118	-0.0733099	-0.00291016	0.95409
PRE4g9-GCD6-TRg-4	0.0390646	0.454998	0.0382772	0.740346
PRE4g9-YPT6-NRg-2	NA	NA	NA	NA
PRE4g9-RPS13-TRg-2	-0.0296574	-0.424606	-0.0296848	0.598931
PRE4g9-IPI3-TRg-3	0.10656	1.31891	0.10839	0.488602
PRE4g9-TIF5-NRg-9	-0.0150303	-0.237387	-0.0151252	0.899575
PRE4g9-TIF5-NRg-7	0.0292143	0.328918	0.0289371	0.804937
PRE4g9-TIF5-NRg-6	-0.0169259	-0.261651	-0.0172557	0.714521
PRE4g9-NAB3-TRg-3	-0.101401	-1.34289	-0.103062	0.328351
PRE4g9-GCD2-TRg-1	0.0817174	1.00093	0.0805862	0.325652
PRE4g9-UBA1-TRg-2	0.0216205	0.231722	0.0215763	0.937082
PRE4g9-SLD3-TRg-6	-0.121963	-1.60607	-0.122652	0.470503
PRE4g9-LCB1-TRg-5	0.132008	1.64462	0.133013	0.334616
PRE4g9-TOA2-TRg-6	0.0931068	1.14671	0.0922461	0.438333
PRE4g9-TOA2-TRg-1	0.0731952	0.89185	0.0733091	0.123601
PRE4g9-TOA2-TRg-3	-0.0479591	-0.658858	-0.0479985	0.765903
PRE4g9-LSM2-TRg-1	-0.0284882	-0.409641	-0.0270127	0.7335
PRE4g9-YML6-TRg-13	-0.0248041	-0.362486	-0.0229797	0.620016
PRE4g9-YML6-TRg-12	-0.0211317	-0.315482	-0.0197366	0.72674
PRE4g9-UTP15-NRg-1	0.0476061	0.564324	0.0478687	0.776943
PRE4g9-TIF6-NRg-8	0.0162229	0.162636	0.0184557	0.867755
PRE4g9-SUP35-NRg-1	0.0497934	0.59232	0.0496193	0.703033
PRE4g9-MPP10-NRg-1	0.00221249	-0.0166893	0.00327197	0.907803
PRE4g9-SWI3-TRg-7	-0.189784	-2.47413	-0.189081	0.259125
PRE4g9-SSN3-NRg-2	0.121563	1.51093	0.123324	0.263066
PRE4g9-SEC13-NRg-7	0.080515	0.985539	0.0784915	0.507422
PRE4g9-RPS15-NRg-3	-0.333007	-4.30732	-0.332698	0.340653
PRE4g9-RPL3-TRg-2	0.0880797	1.08236	0.0880235	0.615987
PRE4g9-FBA1-NRg-2	0.022738	0.246026	0.0244664	0.544001
PRE4g9-FBA1-NRg-1	0.0114457	0.10149	0.0130525	0.969176
PRE4g9-FBA1-NRg-5	-0.0338345	-0.478071	-0.0319798	0.645323
PRE4g9-DAM1-TRg-2	NA	NA	NA	NA
PRE4g9-NHP2-TRg-2	0.00408773	0.00731262	0.0056848	0.969097
PRE4g9-HCA4-NRg-6	-0.00273464	-0.0800099	-0.000853679	0.773228
PRE4g9-PRE3-TRg-4	NA	NA	NA	NA
PRE4g9-DBP5-NRg-4	0.0120489	0.109211	0.0116532	0.960616
PRE4g9-SPT6-NRg-4	0.0278699	0.311711	0.0299951	0.594665
PRE4g9-SPT6-NRg-2	0.00986623	0.0812743	0.0115377	0.981693
PRE4g9-RPL18A-TRg-4	0.069767	0.84797	0.0702115	0.507906
PRE4g9-KSH1-TRg-1	0.0111946	0.0982766	0.0108944	0.965497
PRE4g9-KSH1-TRg-3	0.0493218	0.586284	0.0506168	0.785996
PRE4g9-IPI3-NRg-1	0.0452103	0.533658	0.0460825	0.279081
PRE4g9-PGA2-TRg-8	0.00586405	0.0300485	0.00815205	0.993107
PRE4g9-RPL18A-TRg-2	0.081349	0.996214	0.0823273	0.676566
PRE4g9-RPL33A-NRg-6	0.0173859	0.177522	0.0186836	0.876183
PRE4g9-TAF12-NRg-2	0.0351463	0.404846	0.0354994	0.628217
PRE4g9-USE1-TRg-5	0.10556	1.30611	0.10732	0.351504
PRE4g9-YNL114C-TRg-1	0.035513	0.409538	0.037188	0.892656
PRE4g9-SMC5-TRg-7	-0.0129648	-0.21095	-0.0105075	0.871243
PRE4g9-SMC5-TRg-6	0.0160358	0.160241	0.0180663	0.947558
PRE4g9-RSC58-TRg-1	-0.0211703	-0.315976	-0.0194982	0.868306
PRE4g9-CTF13-TRg-2	-0.0937369	-1.24479	-0.0949856	0.585837
PRE4g9-NAB2-NRg-2	-0.0147607	-0.233937	-0.0149977	0.894096
PRE4g9-MCM7-TRg-4	-0.0347646	-0.489975	-0.0372975	0.697559
PRE4g9-BCP1-NRg-5	-0.152137	-1.99227	-0.151757	0.256248
PRE4g9-STU2-TRg-3	-0.141361	-1.85435	-0.143087	0.445233
PRE4g9-SEC21-NRg-6	0.0712583	0.867059	0.0715087	0.563106
PRE4g9-SEC21-NRg-3	0.0107163	0.0921552	0.0102411	0.979906
PRE4g9-RPL1B-TRg-3	0.121177	1.50599	0.121694	0.273584
PRE4g9-SEC20-NRg-2	0.154265	1.9295	0.154972	0.300206
PRE4g9-VMA3-NRg-2	0.0787845	0.96339	0.0786607	0.847859
PRE4g9-SEC23-NRg-5	-0.0146447	-0.232452	-0.012436	0.799098
PRE4g9-CDC28-TRg-4	-0.0105874	-0.180521	-0.0092371	0.80351
PRE4g9-RPN12-NRg-11	0.00655154	0.038848	0.00810782	0.991807
PRE4g9-PUP3-TRg-3	-0.0615787	-0.833181	-0.0628732	0.765862
PRE4g9-SEC31-TRg-2	0.158865	1.98838	0.156789	0.513288
PRE4g9-SED5-TRg-6	0.0362785	0.419337	0.0363853	0.577103
PRE4g9-SED5-TRg-5	0.00772247	0.0538353	0.00903337	0.959279
PRE4g9-RPL33A-TRg-1	-0.0011696	-0.0599783	0.000326987	0.693462
PRE4g9-RPL33A-TRg-2	0.0630907	0.762518	0.064844	0.650951
PRE4g9-MRPL11-TRg-2	-0.016734	-0.259194	-0.0178274	0.846914
PRE4g9-RTP1-NRg-2	-0.0510916	-0.698953	-0.0500546	0.426357
PRE4g9-NUG1-TRg-2	0.0824264	1.01	0.0828804	0.532391
PRE4g9-VPH2-TRg-4	0.0290271	0.326523	0.0305048	0.726313
PRE4g9-COP1-NRg-3	0.136085	1.6968	0.134299	0.0137583
PRE4g9-CRM1-NRg-1	0.0186012	0.193076	0.0187087	0.550066
PRE4g9-RPL5-NRg-4	-0.0558887	-0.760352	-0.0573898	0.620123
PRE4g9-SNU13-NRg-4	NA	NA	NA	NA
PRE4g9-PFS2-TRg-3	-0.0584166	-0.792708	-0.060427	0.383969
PRE4g9-MPP10-TRg-2	0.00583627	0.029693	0.00652942	0.995297
PRE4g9-TSR4-NRg-2	-0.0891138	-1.18562	-0.087366	0.387847
PRE4g9-RSC2-TRg-1	0.0388036	0.451657	0.0410912	0.524632
PRE4g9-SEC65-TRg-2	0.081148	0.993641	0.0829396	0.37164
PRE4g9-SMI1-NRg-1	0.101044	1.2483	0.101838	0.356898
PRE4g9-RTT105-NRg-4	-0.0679321	-0.914501	-0.0669597	0.693735
PRE4g9-VMA5-TRg-3	-0.000869271	-0.0561342	-0.000343162	0.894034
PRE4g9-VMA5-TRg-5	0.0226702	0.245158	0.0244301	0.938872
PRE4g9-RRP1-TRg-3	0.119413	1.48341	0.120896	0.36476
PRE4g9-CLC1-TRg-2	-0.134293	-1.76388	-0.135598	0.536401
PRE4g9-GCD6-NRg-1	0.0935018	1.15176	0.0919229	0.396956
PRE4g9-GCD6-NRg-2	0.123321	1.53344	0.122866	0.384484
PRE4g9-PXR1-TRg-1	0.0414706	0.485792	0.0430383	0.796519
PRE4g9-CDC14-NRg-1	-0.0270753	-0.391557	-0.0273042	0.796082
PRE4g9-PCF11-TRg-6	-0.0676026	-0.910283	-0.0698496	0.619445
PRE4g9-PCF11-TRg-5	-0.0779588	-1.04284	-0.0807212	0.518733
PRE4g9-PCF11-TRg-4	-0.119256	-1.57142	-0.121548	0.364704
PRE4g9-SEC31-NRg-1	-0.152392	-1.99555	-0.154811	0.271535
PRE4g9-RRP5-NRg-1	-0.00596369	-0.12134	-0.00516339	0.87127
PRE4g9-PRE10-TRg-5	-0.0323627	-0.459232	-0.0333006	0.75574
PRE4g9-PRE10-TRg-1	-0.111352	-1.47025	-0.112206	0.577628
PRE4g9-RPS5-TRg-2	-0.113642	-1.49956	-0.113269	0.305774
PRE4g9-NSP1-TRg-4	0.0796814	0.97487	0.0796527	0.522584
PRE4g9-PRP38-TRg-4	0.044128	0.519805	0.0449985	0.639528
PRE4g9-RCF1-NRg-5	-0.00319313	-0.0858783	-0.00141389	0.942042
PRE4g9-RSC3-TRg-4	-0.0112127	-0.188524	-0.010655	0.866601
PRE4g9-RSC3-TRg-5	0.0537831	0.643386	0.0538447	0.69644
PRE4g9-RSC3-TRg-6	-0.141937	-1.86173	-0.14059	0.356409
PRE4g9-HTA1-NRg-12	0.0540454	0.646743	0.0554936	0.592376
PRE4g9-HTA1-NRg-11	-0.0168176	-0.260264	-0.0140066	0.753002
PRE4g9-UTP23-TRg-2	-0.0388217	-0.541905	-0.0373162	0.545757
PRE4g9-GCD7-NRg-1	-0.0303566	-0.433556	-0.0310631	0.588262
PRE4g9-GCD7-NRg-2	0.0814278	0.997223	0.0810295	0.503474
PRE4g9-GCD7-NRg-6	-0.0647583	-0.873878	-0.0636106	0.575331
PRE4g9-GAL11-NRg-2	-0.0942879	-1.25184	-0.0929952	0.311304
PRE4g9-GAL11-NRg-9	-0.104527	-1.3829	-0.103195	0.36856
PRE4g9-PHO4-TRg-5	0.191442	2.40535	0.192429	0.336714
PRE4g9-SNP1-NRg-3	-0.0182598	-0.278724	-0.016369	0.721802
PRE4g9-RPC37-TRg-5	0.0909335	1.11889	0.0915188	0.509377
PRE4g9-CRM1-TRg-5	0.0603488	0.727424	0.0604768	0.727344
PRE4g9-CRM1-TRg-2	-0.0172157	-0.265359	-0.015852	0.910363
PRE4g9-ASK1-TRg-7	NA	NA	NA	NA
PRE4g9-STU2-NRg-4	-0.060033	-0.813398	-0.0612995	0.677025
PRE4g9-NEO1-NRg-3	-0.280104	-3.63018	-0.280289	0.302536
PRE4g9-GAL11-TRg-5	-0.0314809	-0.447947	-0.0301404	0.593546
PRE4g9-GAL11-TRg-7	-0.079807	-1.06649	-0.0780699	0.457467
PRE4g9-SAM50-NRg-3	0.0804572	0.9848	0.082088	0.612716
PRE4g9-CSL4-TRg-2	-0.106071	-1.40266	-0.105727	0.429423
PRE4g9-CCT5-TRg-2	0.203401	2.55841	0.202555	0.316421
PRE4g9-POL30-NRg-1	0.166356	2.08426	0.166067	0.318766
PRE4g9-MED4-TRg-4	0.0340407	0.390694	0.0353085	0.444292
PRE4g9-MED4-TRg-3	0.0390832	0.455235	0.0400037	0.732655
PRE4g9-MED4-TRg-2	-0.024846	-0.363022	-0.0227988	0.419825
PRE4g9-GDI1-TRg-4	-0.0836511	-1.1157	-0.0816406	0.427351
PRE4g9-GDI1-TRg-3	-0.0606155	-0.820853	-0.0582544	0.561048
PRE4g9-REB1-TRg-6	-0.1802	-2.35147	-0.180292	0.228874
PRE4g9-MRPL37-NRg-2	-0.0604994	-0.819367	-0.0582784	0.488119
PRE4g9-NOC3-TRg-3	-0.0818349	-1.09245	-0.0795787	0.208154
PRE4g9-SPC97-TRg-3	NA	NA	NA	NA
PRE4g9-IPP1-TRg-3	0.0773172	0.94461	0.0778376	0.613531
PRE4g9-IPP1-TRg-2	0.00832298	0.0615215	0.00835163	0.994095
PRE4g9-PTI1-TRg-3	NA	NA	NA	NA
PRE4g9-PTI1-TRg-5	-0.160138	-2.09468	-0.161971	0.483789
PRE4g9-RFC5-NRg-1	0.0506569	0.603372	0.0518669	0.687736
PRE4g9-CDC24-TRg-1	0.0591669	0.712295	0.0583679	0.564494
PRE4g9-CDC24-TRg-3	-0.0506648	-0.693489	-0.0518484	0.573523
PRE4g9-CDC24-TRg-5	-0.0543868	-0.741129	-0.0549819	0.792121
PRE4g9-CDC24-TRg-6	-0.0495023	-0.678609	-0.0493752	0.8708
PRE4g9-UTP23-TRg-6	-0.0364833	-0.511974	-0.034246	0.65241
PRE4g9-UTP23-TRg-4	0.000960593	-0.0327129	0.00269309	0.900459
PRE4g9-UTP23-TRg-1	0.0220976	0.237828	0.0235905	0.755613
PRE4g9-RHO3-NRg-4	-0.0102056	-0.175633	-0.00903505	0.807833
PRE4g9-TRS23-NRg-1	-0.020389	-0.305976	-0.022113	0.353031
PRE4g9-TRS23-NRg-3	-0.0901908	-1.1994	-0.0886617	0.437719
PRE4g9-RSP5-TRg-2	-0.0855571	-1.14009	-0.0842059	0.380154
PRE4g9-RSP5-TRg-1	-0.133954	-1.75954	-0.133266	0.480281
PRE4g9-SDA1-NRg-1	0.120246	1.49407	0.120498	0.301237
PRE4g9-KAP95-TRg-8	-0.190478	-2.48302	-0.189734	0.330829
PRE4g9-ACO1-TRg-6	NA	NA	NA	NA
PRE4g9-HTA1-NRg-3	0.0409382	0.478978	0.0424394	0.62923
PRE4g9-HTA1-NRg-2	0.030518	0.345605	0.0315033	0.773643
PRE4g9-SPN1-TRg-1	0.0485757	0.576733	0.0482674	0.79247
PRE4g9-MOT1-NRg-7	-0.0498111	-0.682563	-0.0498554	0.293973
PRE4g9-RPL17A-NRg-4	-0.0614337	-0.831325	-0.0601598	0.157336
PRE4g9-ADA2-TRg-4	0.0508398	0.605714	0.0533024	0.493011
PRE4g9-SFH1-NRg-1	-0.109489	-1.44641	-0.108104	0.570066
PRE4g9-SPC97-NRg-5	-0.0878175	-1.16902	-0.0916663	0.704787
PRE4g9-PRP22-TRg-3	NA	NA	NA	NA
PRE4g9-SEN15-TRg-2	0.0767795	0.937727	0.0779742	0.466745
PRE4g9-RPL3-NRg-2	0.0921556	1.13453	0.0901736	0.479572
PRE4g9-ISD11-NRg-2	0.0177853	0.182634	0.0189366	0.916105
PRE4g9-HEM12-TRg-8	-0.020607	-0.308766	-0.0188479	0.881048
PRE4g9-SEC10-TRg-1	-0.0631313	-0.853053	-0.0645678	0.827338
PRE4g9-HTB1-TRg-7	-0.0474064	-0.651783	-0.0450422	0.607729
PRE4g9-TTI2-TRg-1	0.0495823	0.589618	0.0509777	0.731913
PRE4g9-ACP1-TRg-2	-0.165472	-2.16296	-0.16665	0.277871
PRE4g9-ACP1-TRg-4	-0.0113338	-0.190075	-0.0115394	0.876636
PRE4g9-GAL11-NRg-10	0.0947731	1.16803	0.0916265	0.666368
PRE4g9-UTP22-TRg-2	-0.0362458	-0.508934	-0.0340172	0.5692
PRE4g9-MST1-NRg-5	-0.0178986	-0.274101	-0.0191556	0.855794
PRE4g9-RIB7-NRg-2	0.0964776	1.18985	0.0977416	0.267289
PRE4g9-MCD1-TRg-6	0.00472137	0.0154229	0.00619956	0.98836
PRE4g9-MCD1-TRg-5	-0.155157	-2.03093	-0.153471	0.454681
PRE4g9-GPI8-NRg-2	-0.0448382	-0.618912	-0.0456856	0.480758
PRE4g9-THS1-TRg-2	0.160218	2.0057	0.160391	0.429277
PRE4g9-RRP7-TRg-2	0.0568115	0.682147	0.0566504	0.697107
PRE4g9-RRP7-TRg-5	0.107116	1.32602	0.10556	0.554793
PRE4g9-SMX2-NRg-7	0.0315018	0.358198	0.0329881	0.886529
PRE4g9-RRP45-TRg-5	-0.119142	-1.56996	-0.119142	0.336722
PRE4g9-RRP45-TRg-4	-0.101351	-1.34225	-0.101332	0.256856
PRE4g9-CNS1-TRg-2	0.0196852	0.206951	0.0214597	0.710601
PRE4g9-FBP1-NRg-9	0.0384506	0.447138	0.0391053	0.772624
PRE4g9-GCD11-NRg-1	0.0587845	0.707401	0.0570423	0.856703
PRE4g9-RPL10-TRg-2	0.165315	2.07094	0.16603	0.366122
PRE4g9-NUP192-TRg-4	-0.0778822	-1.04186	-0.0779474	0.535634
PRE4g9-NUP145-NRg-4	-0.0945695	-1.25544	-0.0926005	0.42622
PRE4g9-HEM12-TRg-6	-0.0944163	-1.25348	-0.0914944	0.441404
PRE4g9-PLC1-TRg-3	-0.0428093	-0.592943	-0.0452373	0.642529
PRE4g9-RPA43-TRg-1	0.00116644	-0.0300782	0.00213197	0.96899
PRE4g9-RPB7-NRg-2	0.0292859	0.329835	0.0284049	0.884603
PRE4g9-RPB7-NRg-3	-0.0280737	-0.404336	-0.029336	0.826333
PRE4g9-NSL1-NRg-1	0.0689443	0.83744	0.0668478	0.615987
PRE4g9-UTP6-TRg-3	0.0192699	0.201635	0.0205674	0.93061
PRE4g9-UTP6-TRg-1	0.137844	1.71932	0.138257	0.264642
PRE4g9-YJU2-TRg-5	-0.108374	-1.43214	-0.108662	0.501935
PRE4g9-FRS2-NRg-5	0.0243869	0.267131	0.023967	0.856284
PRE4g9-TIF35-NRg-2	0.0593243	0.71431	0.0585522	0.389085
PRE4g9-GPI15-TRg-1	0.109097	1.35137	0.110126	0.356235
PRE4g9-NOP1-NRg-5	0.0526452	0.628821	0.0535499	0.623893
PRE4g9-GPI15-TRg-4	-0.0334512	-0.473165	-0.0301685	0.873674
PRE4g9-COG4-TRg-1	0.00263884	-0.0112323	0.00265661	0.982399
PRE4g9-TFA1-TRg-1	0.0275152	0.307171	0.0273652	0.663369
PRE4g9-RHO1-NRg-2	-0.0684699	-0.921384	-0.0709168	0.621289
PRE4g9-RHO1-NRg-1	0.173805	2.17961	0.173246	0.394134
PRE4g9-CDC55-NRg-2	-0.0944097	-1.2534	-0.0945227	0.304642
PRE4g9-IDI1-NRg-7	-0.0715367	-0.960638	-0.0693459	0.356464
PRE4g9-RPL32-TRg-5	NA	NA	NA	NA
PRE4g9-RPB5-TRg-4	0.0564346	0.677323	0.0563712	0.804148
PRE4g9-DIP2-TRg-5	0.100364	1.2396	0.102011	0.494404
PRE4g9-DIP2-TRg-1	0.0487796	0.579344	0.0494495	0.465874
PRE4g9-RPC40-TRg-2	0.0317423	0.361275	0.0329324	0.333594
PRE4g9-CDC6-TRg-5	-0.00444853	-0.101947	-0.00257251	0.896651
PRE4g9-CDC6-TRg-3	-0.0548389	-0.746916	-0.0550868	0.673373
PRE4g9-DAD2-TRg-2	0.027276	0.30411	0.0243042	0.875149
PRE4g9-RVS161-TRg-2	-0.00491881	-0.107966	-0.00480117	0.862591
PRE4g9-RVS161-TRg-1	-0.129005	-1.6962	-0.127583	0.266008
PRE4g9-SUP45-NRg-3	0.0971903	1.19897	0.0959038	0.536523
PRE4g9-SRB6-NRg-5	-0.0239202	-0.351173	-0.0237256	0.529486
PRE4g9-RPC11-TRg-4	0.111447	1.38145	0.111935	0.470531
PRE4g9-RKI1-TRg-8	-0.0156524	-0.24535	-0.0138131	0.799412
PRE4g9-NIP7-TRg-3	0.0458915	0.542377	0.047174	0.587844
PRE4g9-RPL33A-NRg-12	0.0404817	0.473135	0.0415435	0.796516
PRE4g9-SAM50-TRg-4	-0.0439732	-0.607841	-0.0421763	0.774662
PRE4g9-NOP4-NRg-1	0.040851	0.477862	0.0431883	0.592118
PRE4g9-NOP4-NRg-3	0.0770647	0.941378	0.0778445	0.238452
PRE4g9-SMX2-TRg-5	-0.0754794	-1.0111	-0.0738844	0.304049
PRE4g9-POL12-NRg-2	-0.103991	-1.37603	-0.103046	0.504252
PRE4g9-BMS1-NRg-2	0.0341235	0.391754	0.0361048	0.625884
PRE4g9-RPA190-TRg-5	-0.0370876	-0.519709	-0.0355198	0.431502
PRE4g9-ALG14-NRg-4	0.0408997	0.478485	0.0428467	0.851146
PRE4g9-ALG14-NRg-1	0.0925804	1.13997	0.0945608	0.418629
PRE4g9-PRE5-NRg-1	0.0139767	0.133886	0.0124486	0.981129
PRE4g9-BIG1-NRg-2	-0.000204452	-0.0476249	0.000714154	0.950056
PRE4g9-TFA2-TRg-4	-0.116531	-1.53654	-0.117383	0.452733
PRE4g9-IMP4-TRg-6	-0.0706571	-0.949379	-0.0699309	0.655469
PRE4g9-PAN1-NRg-1	-0.007491	-0.140889	-0.0095149	0.741887
PRE4g9-UTP13-TRg-2	0.125888	1.56629	0.126438	0.525652
PRE4g9-KAE1-NRg-3	0.0682723	0.82884	0.0698384	0.557623
PRE4g9-ERG20-TRg-1	0.12773	1.58987	0.128977	0.409835
PRE4g9-CDC20-TRg-6	NA	NA	NA	NA
PRE4g9-PWP2-NRg-2	0.0258287	0.285585	0.0280009	0.816719
PRE4g9-COG1-NRg-1	-0.195679	-2.54959	-0.196405	0.147405
PRE4g9-RPL1B-TRg-4	0.102366	1.26522	0.102346	0.342418
PRE4g9-RPL1B-TRg-7	0.0869635	1.06808	0.0876336	0.342579
PRE4g9-UTP20-TRg-3	-0.0146002	-0.231883	-0.0135833	0.895666
PRE4g9-UTP20-TRg-4	0.148103	1.85063	0.149153	0.38207
PRE4g9-RPL25-TRg-4	0.0238696	0.26051	0.024055	0.601196
PRE4g9-RPL25-TRg-2	0.0646675	0.7827	0.0648354	0.384848
PRE4g9-MCM7-NRg-1	0.0533382	0.637692	0.0522808	0.770373
PRE4g9-MRP49-TRg-5	-0.0748591	-1.00316	-0.07326	0.444602
PRE4g9-ERO1-NRg-3	-0.0819144	-1.09347	-0.0825418	0.541287
PRE4g9-UTP5-TRg-7	-0.00738495	-0.139531	-0.00558841	0.718716
PRE4g9-MCM4-NRg-1	-0.0323827	-0.459489	-0.0329646	0.796619
PRE4g9-PRE3-NRg-1	-0.05109	-0.698931	-0.0517218	0.724614
PRE4g9-FCF1-NRg-1	0.0825993	1.01222	0.0829663	0.396491
PRE4g9-CUS1-NRg-1	0.0498201	0.592662	0.0495341	0.85807
PRE4g9-PSF1-TRg-2	0.10576	1.30866	0.1059	0.395023
PRE4g9-BCP1-TRg-2	-0.0344383	-0.485799	-0.0326237	0.521174
PRE4g9-PAN1-TRg-1	-0.088775	-1.18128	-0.0901064	0.42552
PRE4g9-PAN1-TRg-3	NA	NA	NA	NA
PRE4g9-PAN1-TRg-4	-0.0431268	-0.597007	-0.0451692	0.819945
PRE4g9-VPS3-TRg-2	-0.00952372	-0.166906	-0.00696591	0.937586
PRE4g9-YIL060W-NRg-1	0.0302986	0.342797	0.0290951	0.769302
PRE4g9-VPS53-NRg-1	-0.00204479	-0.0711802	-0.0042011	0.972179
PRE4g9-CYR1-TRg-4	-0.0332613	-0.470734	-0.0351627	0.787841
PRE4g9-CYR1-TRg-7	-0.00402205	-0.096488	-0.00532849	0.939737
PRE4g9-MPS1-NRg-1	0.128954	1.60553	0.127082	0.4017
PRE4g9-SRP1-TRg-5	NA	NA	NA	NA
PRE4g9-SRP1-TRg-4	0.0487873	0.579442	0.0472061	0.659704
PRE4g9-TAF12-TRg-2	-0.187208	-2.44116	-0.189807	0.340753
PRE4g9-TAF12-TRg-3	-0.0995092	-1.31867	-0.102007	0.270538
PRE4g9-POP4-TRg-1	0.0235599	0.256546	0.0241929	0.825275
PRE4g9-SPT16-TRg-1	-0.0428788	-0.593833	-0.0439326	0.635449
PRE4g9-NUP82-TRg-4	0.0199222	0.209985	0.0206968	0.93368
PRE4g9-DML1-TRg-3	0.0374934	0.434887	0.0395868	0.65367
PRE4g9-RPA43-NRg-3	-0.0227073	-0.335649	-0.0219863	0.723507
PRE4g9-STU2-NRg-3	-0.055533	-0.7558	-0.0563984	0.539645
PRE4g9-POP4-NRg-4	-0.0302426	-0.432096	-0.0284658	0.29055
PRE4g9-MCD1-TRg-2	-0.00696243	-0.134123	-0.00542445	0.865051
PRE4g9-RPS3-NRg-4	-0.116356	-1.53431	-0.115901	0.247291
PRE4g9-PRP9-TRg-4	0.00384922	0.00425991	0.00533916	0.983217
PRE4g9-RPP1-NRg-2	0.0690276	0.838507	0.069893	0.234617
PRE4g9-MTR2-NRg-11	-0.00839841	-0.152503	-0.00736011	0.909902
PRE4g9-GCD11-TRg-1	0.0575209	0.691228	0.0558582	0.612061
PRE4g9-RPF1-TRg-3	-0.0644221	-0.869575	-0.0635782	0.625963
PRE4g9-SUB2-NRg-4	-0.112609	-1.48633	-0.112174	0.554421
PRE4g9-GPI15-TRg-3	0.130058	1.61966	0.131003	0.19737
PRE4g9-ERG9-TRg-6	-0.00621806	-0.124596	-0.0044824	0.889516
PRE4g9-RPT2-NRg-1	0.0232442	0.252505	0.0230944	0.956995
PRE4g9-YOS1-NRg-3	-0.0302214	-0.431825	-0.0313225	0.543191
PRE4g9-SCM3-TRg-4	-0.0546379	-0.744342	-0.0523842	0.477899
PRE4g9-SCM3-TRg-6	0.0665891	0.807295	0.0684924	0.340932
PRE4g9-RLP7-NRg-1	0.0044303	0.0116973	0.00553825	0.987951
PRE4g9-TFB2-NRg-4	-0.0868568	-1.15673	-0.0873449	0.298076
PRE4g9-IMP4-TRg-1	0.0724517	0.882333	0.0739515	0.477964
PRE4g9-IMP4-TRg-3	-0.00820094	-0.149975	-0.00654564	0.801754
PRE4g9-PRE4-TRg-3	-0.025608	-0.372776	-0.0268604	0.804392
PRE4g9-SUB2-TRg-3	-0.0591922	-0.802636	-0.0602004	0.707058
PRE4g9-RPP0-NRg-4	0.0220091	0.236696	0.0220413	0.911917
PRE4g9-RPP0-NRg-3	0.0454995	0.537361	0.046685	0.593748
PRE4g9-TOM40-TRg-4	-0.0617377	-0.835217	-0.0615253	0.397737
PRE4g9-FUR1-NRg-12	-0.0414838	-0.575977	-0.0389217	0.443568
PRE4g9-TOM40-TRg-2	-0.0345794	-0.487604	-0.0349744	0.672348
PRE4g9-VMA11-NRg-4	0.097942	1.2086	0.100868	0.193074
PRE4g9-PGS1-NRg-4	0.085597	1.05059	0.0852029	0.610838
PRE4g9-URB1-TRg-4	-0.0171745	-0.264832	-0.0148687	0.726989
PRE4g9-ARP4-TRg-3	0.0953643	1.1756	0.0947886	0.328527
PRE4g9-RPT3-TRg-3	-0.285781	-3.70284	-0.284267	0.215114
PRE4g9-SUI3-TRg-3	-0.00649798	-0.128179	-0.00733812	0.675487
PRE4g9-RFC5-NRg-2	NA	NA	NA	NA
PRE4g9-RRP14-TRg-2	0.0528657	0.631643	0.0531203	0.534662
PRE4g9-SCC2-TRg-1	0.104116	1.28762	0.103812	0.477796
PRE4g9-SSC1-TRg-3	-0.112346	-1.48298	-0.113342	0.402678
PRE4g9-RRP9-TRg-3	-0.00114869	-0.0597106	0.00112925	0.687736
PRE4g9-MOT1-NRg-9	-0.0825	-1.10096	-0.0836913	0.51786
PRE4g9-RPL42A-NRg-2	0.000628982	-0.0369574	0.00222181	0.861812
PRE4g9-SEC16-TRg-7	NA	NA	NA	NA
PRE4g9-IMP4-NRg-2	0.0549749	0.65864	0.0559476	0.531871
PRE4g9-YEF3-NRg-4	-0.00407529	-0.0971694	-0.004629	0.861345
PRE4g9-PUP1-TRg-1	-0.0503622	-0.689617	-0.051538	0.431404
PRE4g9-UTP22-TRg-6	0.0206958	0.219887	0.0233125	0.812984
PRE4g9-DBP2-NRg-4	-0.0662507	-0.89298	-0.0647499	0.360824
PRE4g9-PRE2-TRg-7	0.0392521	0.457398	0.0417965	0.651832
PRE4g9-ATP16-TRg-6	-0.134236	-1.76316	-0.137355	0.28222
PRE4g9-UTP13-TRg-4	0.0610677	0.736625	0.0618829	0.26595
PRE4g9-DOP1-NRg-4	-0.0727623	-0.976325	-0.0743709	0.610247
PRE4g9-TIM44-TRg-3	-0.0443879	-0.613148	-0.0446587	0.262295
PRE4g9-ATP16-TRg-2	NA	NA	NA	NA
PRE4g9-ENP1-NRg-3	-0.0106125	-0.180842	-0.00989777	0.75574
PRE4g9-NAF1-TRg-3	0.0623967	0.753634	0.0645669	0.402348
PRE4g9-COG4-TRg-2	0.0748336	0.912821	0.0751308	0.29265
PRE4g9-SOG2-TRg-7	0.192938	2.42449	0.191068	0.394987
PRE4g9-YDR341C-TRg-3	0.0636421	0.769576	0.0629292	0.495496
PRE4g9-YMR290W-A-TRg-10	0.171099	2.14497	0.172724	0.450969
PRE4g9-NUP192-NRg-9	0.0729311	0.888469	0.0728314	0.489493
PRE4g9-RPS31-NRg-8	-0.10694	-1.41378	-0.106641	0.542449
PRE4g9-SPC97-NRg-6	NA	NA	NA	NA
PRE4g9-EBP2-NRg-1	-0.0035877	-0.0909285	-0.00264479	0.916637
PRE4g9-CDC48-TRg-5	0.0843212	1.03426	0.0838433	0.635172
PRE4g9-RPT1-TRg-4	-0.0122831	-0.202225	-0.0129721	0.793369
PRE4g9-ULP1-NRg-2	-0.327257	-4.23372	-0.326286	0.174917
PRE4g9-RPN3-TRg-6	-0.132485	-1.74075	-0.132792	0.255524
PRE4g9-RPT1-TRg-5	-0.0790269	-1.05651	-0.0790324	0.425727
PRE4g9-KRE5-TRg-2	0.00369064	0.00223009	0.00546939	0.973313
PRE4g9-TBF1-NRg-8	0.0080223	0.0576729	0.00900849	0.992176
PRE4g9-UTP22-NRg-4	-0.053936	-0.735359	-0.0510717	0.47228
PRE4g9-SSC1-NRg-4	0.127464	1.58646	0.126611	0.409905
PRE4g9-REB1-TRg-4	-0.0993622	-1.31679	-0.100132	0.414693
PRE4g9-CDC48-NRg-9	0.185672	2.33149	0.185833	0.330202
PRE4g9-FAS2-TRg-8	0.0173629	0.177228	0.0164455	0.955692
PRE4g9-TAO3-TRg-8	0.0307396	0.348442	0.0291804	0.949149
PRE4g9-CKS1-TRg-5	-0.159243	-2.08323	-0.160241	0.594574
PRE4g9-YLR379W-TRg-7	0.109913	1.36181	0.111838	0.414272
PRE4g9-TEN1-NRg-2	0.0193082	0.202126	0.0184858	0.877985
PRE4g9-RPL42A-TRg-2	0.0619539	0.747968	0.0639245	0.359551
PRE4g9-SEC27-TRg-4	NA	NA	NA	NA
PRE4g9-TBF1-NRg-4	-0.0877546	-1.16822	-0.0869175	0.380304
PRE4g9-RPT1-NRg-6	-0.0694267	-0.933632	-0.0700636	0.480867
PRE4g9-COG1-TRg-3	NA	NA	NA	NA
PRE4g9-SUI1-TRg-6	-0.0358095	-0.50335	-0.0339027	0.750913
PRE4g9-TIM23-TRg-6	-0.111818	-1.47622	-0.110609	0.290647
PRE4g9-CDC48-NRg-6	-0.0371568	-0.520594	-0.037494	0.681625
PRE4g9-EPL1-TRg-5	0.171441	2.14934	0.171098	0.32457
PRE4g9-RPT5-TRg-8	-0.0845855	-1.12766	-0.084347	0.502859
PRE4g9-ATP16-NRg-4	NA	NA	NA	NA
PRE4g9-RPN6-TRg-3	-0.0456616	-0.629451	-0.0463555	0.739741
PRE4g9-ERG9-NRg-6	0.0795118	0.972699	0.0809741	0.572838
PRE4g9-SMX3-TRg-1	0.0828651	1.01562	0.0819794	0.484414
PRE4g9-NCB2-NRg-3	0.00982391	0.0807325	0.0107064	0.950948
PRE4g9-SEC16-NRg-12	-0.255756	-3.31854	-0.254774	0.363202
PRE4g9-RPN6-TRg-2	-0.0150537	-0.237687	-0.0157017	0.813547
PRE4g9-REB1-NRg-4	0.142352	1.77702	0.141812	0.326028
PRE4g9-ATP16-TRg-9	NA	NA	NA	NA
PRE4g9-ERG9-NRg-7	0.0249118	0.27385	0.0269879	0.859986
PRE4g3-RPL15A-NRg-4	-0.016106	-0.251156	-0.0141518	0.765194
PRE4g3-RPL15A-NRg-5	0.0518903	0.619158	0.0531185	0.49818
PRE4g3-KRE33-TRg-1	0.0109744	0.0954588	0.00979017	0.97227
PRE4g3-PMI40-NRg-1	-0.113651	-1.49968	-0.115513	0.44983
PRE4g3-NOP19-NRg-3	-0.0621005	-0.83986	-0.0637311	0.644271
PRE4g3-SRP14-NRg-4	-0.027376	-0.395406	-0.0284702	0.844239
PRE4g3-SEC27-TRg-2	-0.0218103	-0.324167	-0.0185417	0.936535
PRE4g3-GPI14-TRg-3	-0.0349568	-0.492435	-0.0369693	0.549211
PRE4g3-PAH1-TRg-7	0.0618395	0.746503	0.0634753	0.552277
PRE4g3-PAH1-TRg-6	0.00896572	0.0697482	0.0100449	0.92658
PRE4g3-PAH1-TRg-5	-0.0370415	-0.519118	-0.0345593	0.874907
PRE4g3-PAH1-TRg-3	0.0606492	0.731268	0.0620446	0.288412
PRE4g3-COG3-TRg-1	0.0272444	0.303705	0.0284676	0.768146
PRE4g3-HTS1-NRg-5	0.0384439	0.447053	0.03746	0.767663
PRE4g3-MSN5-TRg-7	NA	NA	NA	NA
PRE4g3-ERG26-TRg-1	0.040507	0.473459	0.0406771	0.46893
PRE4g3-SMD2-TRg-5	0.0309822	0.351547	0.0288363	0.851729
PRE4g3-SMD2-TRg-4	-0.0241569	-0.354203	-0.0266761	0.593603
PRE4g3-SMD2-TRg-1	0.0241686	0.264337	0.0240189	0.810744
PRE4g3-PRE7-TRg-4	0.0380294	0.441747	0.040339	0.441655
PRE4g3-PRE7-TRg-7	0.0403651	0.471643	0.0414243	0.795162
PRE4g3-SEC6-TRg-3	0.0234483	0.255118	0.0228267	0.32457
PRE4g3-ESF2-NRg-1	-0.0795019	-1.06259	-0.0807504	0.368327
PRE4g3-ESF2-NRg-3	0.0403893	0.471953	0.0395217	0.641953
PRE4g3-AFG2-TRg-2	0.021264	0.227159	0.0200198	0.839834
PRE4g3-RRP36-TRg-3	0.0143434	0.13858	0.0147651	0.934418
PRE4g3-RRP36-TRg-5	-0.00306254	-0.0842068	-0.0038409	0.845961
PRE4g3-GCR1-NRg-2	-0.0192965	-0.291992	-0.0188694	0.860676
PRE4g3-PRE4-NRg-4	0.0130039	0.121434	0.0157065	0.815499
PRE4g3-PRE4-NRg-9	0.113915	1.41304	0.113004	0.273103
PRE4g3-DSN1-NRg-2	-0.044276	-0.611716	-0.0436512	0.375562
PRE4g3-GPI11-TRg-3	-0.0441522	-0.610132	-0.0463606	0.507422
PRE4g3-POP3-TRg-1	-0.0587064	-0.796417	-0.0599434	0.511539
PRE4g3-MNE1-TRg-5	-0.486619	-6.27346	-0.486088	0.300189
PRE4g3-RRP12-NRg-1	0.0150413	0.147512	0.0144071	0.874709
PRE4g3-RSC6-TRg-2	0.121549	1.51075	0.12012	0.203259
PRE4g3-CDC25-TRg-1	-0.105679	-1.39764	-0.102149	0.288637
PRE4g3-CDC25-TRg-9	-0.0659252	-0.888814	-0.0618021	0.817043
PRE4g3-YPP1-NRg-3	0.0453028	0.534842	0.0443833	0.622326
PRE4g3-NFS1-NRg-9	0.0197289	0.207511	0.0180912	0.936581
PRE4g3-NFS1-NRg-8	-0.0775715	-1.03788	-0.0779506	0.568416
PRE4g3-UBA2-TRg-1	0.0231042	0.250713	0.0224499	0.911512
PRE4g3-ARP2-NRg-3	NA	NA	NA	NA
PRE4g3-MAK16-TRg-1	0.019886	0.209521	0.0203918	0.912526
PRE4g3-CEP3-NRg-1	0.0906191	1.11487	0.0930249	0.367691
PRE4g3-GUK1-TRg-5	0.0236116	0.257208	0.0219576	0.878571
PRE4g3-GUK1-TRg-2	0.0360132	0.415941	0.0356547	0.845764
PRE4g3-GPI12-NRg-6	-0.0332358	-0.470407	-0.0358114	0.193001
PRE4g3-RPS5-NRg-5	-0.0202879	-0.304682	-0.0210666	0.735066
PRE4g3-RPS5-NRg-2	0.027256	0.303854	0.0266778	0.904926
PRE4g3-RPC19-NRg-1	0.0831734	1.01957	0.0824986	0.390297
PRE4g3-TIM54-TRg-1	0.0434568	0.511215	0.0424011	0.373788
PRE4g3-TEN1-TRg-2	0.085466	1.04891	0.0860931	0.504771
PRE4g3-SAH1-NRg-4	0.0323396	0.368921	0.03234	0.613815
PRE4g3-SAH1-NRg-5	0.0238176	0.259844	0.0225206	0.416378
PRE4g3-SAH1-NRg-3	0.0422799	0.496151	0.0424303	0.842941
PRE4g3-ATP15-NRg-5	-0.209432	-2.72562	-0.20648	0.446613
PRE4g3-SCD5-TRg-5	-0.0947181	-1.25735	-0.0905073	0.629268
PRE4g3-ARB1-NRg-2	-0.0849014	-1.1317	-0.0851602	0.608432
PRE4g3-ARB1-NRg-4	-0.0705482	-0.947985	-0.0722852	0.664017
PRE4g3-PUP2-TRg-1	0.00675979	0.0415136	0.00889758	0.994387
PRE4g3-CCT8-TRg-2	NA	NA	NA	NA
PRE4g3-MCM4-TRg-1	0.0832443	1.02047	0.0848128	0.357612
PRE4g3-LSM4-TRg-1	-0.0220062	-0.326675	-0.0243446	0.765727
PRE4g3-NOP53-NRg-1	0.0498033	0.592446	0.0521799	0.490827
PRE4g3-ATP3-TRg-4	-0.242517	-3.14909	-0.23191	0.273103
PRE4g3-AFG2-NRg-3	-0.0233428	-0.343783	-0.0264736	0.421591
PRE4g3-PRO3-NRg-3	-0.0173546	-0.267138	-0.0191399	0.51463
PRE4g3-NRD1-NRg-10	0.0403635	0.471623	0.0436468	0.681668
PRE4g3-SEC61-TRg-2	-0.0230987	-0.340659	-0.023988	0.757378
PRE4g3-RHO3-TRg-4	-0.0469369	-0.645774	-0.0485891	0.657045
PRE4g3-SNF2-TRg-6	-0.0339226	-0.479198	-0.0326959	0.798542
PRE4g3-SMD2-NRg-3	-0.00455144	-0.103264	-0.00305123	0.915473
PRE4g3-RSC4-TRg-2	-0.0301888	-0.431408	-0.0311512	0.746026
PRE4g3-RSC4-TRg-1	0.116236	1.44275	0.116823	0.180326
PRE4g3-TIF34-TRg-2	0.014609	0.141979	0.0171811	0.853878
PRE4g3-BET1-NRg-1	0.139652	1.74246	0.14255	0.417016
PRE4g3-CDC8-NRg-2	0.0643597	0.77876	0.0630525	0.692592
PRE4g3-PRP42-TRg-2	0.0417119	0.48888	0.0411497	0.432567
PRE4g3-RRB1-TRg-2	0.0267535	0.297421	0.0248148	0.922409
PRE4g3-SPC24-TRg-1	0.0381186	0.442889	0.040631	0.893877
PRE4g3-ILS1-NRg-1	0.0796339	0.974262	0.0805181	0.363979
PRE4g3-GFA1-TRg-2	0.0539455	0.645465	0.052357	0.599166
PRE4g3-SEC21-NRg-10	-0.0722411	-0.969654	-0.0734807	0.313161
PRE4g3-RPC10-NRg-1	0.0439068	0.516975	0.046198	0.573523
PRE4g3-RPB10-TRg-3	0.00510485	0.0203313	0.00654365	0.993647
PRE4g3-RPB10-TRg-2	0.0408104	0.477342	0.0418973	0.306621
PRE4g3-YNL181W-TRg-1	-0.0340783	-0.481192	-0.0362347	0.427046
PRE4g3-RAD3-NRg-1	-0.0133967	-0.216479	-0.0141669	0.820529
PRE4g3-NOP10-TRg-1	0.0226138	0.244436	0.0218255	0.794194
PRE4g3-BFR2-TRg-3	0.0256381	0.283145	0.0241228	0.583611
PRE4g3-MCM2-TRg-6	-0.00557825	-0.116406	-0.00775986	0.885086
PRE4g3-MCM2-TRg-4	-0.0320561	-0.455308	-0.0332376	0.768325
PRE4g3-MPP10-TRg-1	0.0203563	0.215541	0.0198899	0.927426
PRE4g3-RET2-TRg-4	0.013155	0.123368	0.0130934	0.964086
PRE4g3-RET2-TRg-1	-0.00174816	-0.0673834	0.00162629	0.905324
PRE4g3-RPS2-NRg-1	-0.181108	-2.36309	-0.180091	0.380005
PRE4g3-RPS2-NRg-2	-0.0454128	-0.626267	-0.0436037	0.374427
PRE4g3-ORC4-NRg-3	-0.0961307	-1.27543	-0.0979641	0.475208
PRE4g3-TIP20-TRg-7	-0.0471649	-0.648692	-0.0491	0.455306
PRE4g3-SMT3-TRg-1	-0.000892509	-0.0564316	-0.00120906	0.965453
PRE4g3-MSS18-NRg-6	-0.0185079	-0.281899	-0.0203937	0.473284
PRE4g3-YEF3-NRg-9	0.0213563	0.22834	0.026144	0.877355
PRE4g3-ASK1-NRg-1	0.0349769	0.402677	0.0393487	0.687222
PRE4g3-SMC1-TRg-1	0.0370372	0.429048	0.0381517	0.763849
PRE4g3-NIP1-NRg-1	-0.0116443	-0.194049	-0.0128092	0.420823
PRE4g3-RPP1-NRg-1	0.178173	2.23551	0.178291	0.459373
PRE4g3-YDJ1-TRg-6	0.0193986	0.203283	0.0193053	0.910795
PRE4g3-SUB2-NRg-1	0.0215976	0.23143	0.0229747	0.940529
PRE4g3-TIM10-NRg-8	-0.0477598	-0.656307	-0.0486443	0.328744
PRE4g3-TIM10-NRg-4	0.0136015	0.129084	0.0128726	0.941119
PRE4g3-TIM10-NRg-7	-0.0588476	-0.798224	-0.0592876	0.483729
PRE4g3-SKI6-TRg-4	-0.0221483	-0.328493	-0.0235561	0.624527
PRE4g3-TUB4-TRg-1	0.0772801	0.944134	0.0796901	0.294814
PRE4g3-CDC37-NRg-2	-0.0175323	-0.269412	-0.0170961	0.297306
PRE4g3-ISD11-TRg-3	0.0288809	0.324652	0.0272588	0.924092
PRE4g3-YOS1-TRg-4	0.0304208	0.344361	0.0303451	0.360688
PRE4g3-SSC1-TRg-6	0.0592858	0.713818	0.0604961	0.313176
PRE4g3-MTR3-TRg-5	0.0171387	0.174358	0.017887	0.702436
PRE4g3-MTR3-TRg-6	-0.0186408	-0.2836	-0.0197067	0.570769
PRE4g3-TFA1-TRg-2	0.111511	1.38228	0.11263	0.375912
PRE4g3-CDC3-NRg-3	-0.0720392	-0.96707	-0.0738546	0.399317
PRE4g3-ERG25-TA-18	0.0310311	0.352173	0.0291531	0.927711
PRE4g3-RPB11-TRg-4	-0.0464757	-0.639872	-0.0474981	0.653999
PRE4g3-RPB11-TRg-1	0.086578	1.06314	0.0888806	0.356274
PRE4g3-RPB11-TRg-2	0.0426503	0.500892	0.0439971	0.363922
PRE4g3-DED1-TRg-3	-0.0514829	-0.70396	-0.051992	0.649001
PRE4g3-DED1-TRg-1	-0.0673486	-0.907033	-0.0680236	0.697579
PRE4g3-DED1-TRg-6	-0.0562033	-0.764379	-0.0567444	0.395641
PRE4g3-DED1-TRg-4	-0.111125	-1.46734	-0.111168	0.454061
PRE4g3-RPL10-NRg-5	0.000268753	-0.0415681	0.000136384	0.922284
PRE4g3-RPL10-NRg-4	-0.0239727	-0.351845	-0.0249627	0.792297
PRE4g3-EFB1-NRg-1	0.0226287	0.244626	0.0232564	0.844456
PRE4g3-EFB1-NRg-5	-0.00434724	-0.10065	-0.00569503	0.891611
PRE4g3-EFB1-NRg-4	0.106492	1.31803	0.106661	0.47862
PRE4g3-RPT3-NRg-1	-0.0927902	-1.23267	-0.091655	0.382602
PRE4g3-SAC6-TRg-8	-0.0165189	-0.256441	-0.0188877	0.828354
PRE4g3-SAC6-TRg-4	-0.189649	-2.47241	-0.192242	0.291395
PRE4g3-SAC6-TRg-5	-0.115868	-1.52806	-0.118813	0.358276
PRE4g3-SAC6-TRg-3	-0.107312	-1.41854	-0.109794	0.247997
PRE4g3-DIM1-TRg-5	-0.00798718	-0.147239	-0.00987227	0.899788
PRE4g3-DIM1-TRg-7	-0.0519424	-0.709842	-0.0534975	0.454954
PRE4g3-RPC17-NRg-1	0.0834107	1.0226	0.0830673	0.332607
PRE4g3-RPC17-NRg-2	0.020358	0.215564	0.0205743	0.914884
PRE4g3-YDR341C-TRg-1	0.0555382	0.66585	0.0563828	0.188148
PRE4g3-RAP1-NRg-8	-0.0185341	-0.282234	-0.0216212	0.420073
PRE4g3-RAP1-NRg-5	-0.0620666	-0.839426	-0.0593524	0.679991
PRE4g3-RAP1-NRg-2	-0.0187482	-0.284975	-0.018114	0.699848
PRE4g3-SEC26-NRg-3	-0.0770023	-1.03059	-0.0791662	0.228142
PRE4g3-SPP41-TRg-3	0.0337513	0.38699	0.0335694	0.909741
PRE4g3-TAP42-NRg-1	0.00984206	0.0809649	0.0106418	0.975249
PRE4g3-PGA2-TRg-6	0.00323988	-0.00353928	0.00261016	0.904228
PRE4g3-BRL1-TRg-1	0.0486901	0.578198	0.0503535	0.252473
PRE4g3-FOL2-TRg-1	0.0206658	0.219502	0.0191898	0.89781
PRE4g3-NAB3-NRg-5	0.0450842	0.532045	0.0438517	0.729512
PRE4g3-SNF4-TRg-4	0.0498586	0.593154	0.0524875	0.538982
PRE4g3-HRR25-TRg-2	-0.014407	-0.229409	-0.0141223	0.340979
PRE4g3-TRS23-TRg-4	0.00371071	0.00248709	0.00544671	0.973069
PRE4g3-CTR86-TRg-4	-0.0645685	-0.871449	-0.0659788	0.63308
PRE4g3-RPB5-TRg-5	0.0605922	0.730538	0.062328	0.396999
PRE4g3-SPN1-NRg-2	0.0038574	0.00436462	0.00576199	0.983935
PRE4g3-SPN1-NRg-1	0.0529556	0.632794	0.0553338	0.63658
PRE4g3-SEC61-NRg-1	0.0499254	0.594009	0.049729	0.533348
PRE4g3-SEC61-NRg-7	0.0668216	0.810272	0.06699	0.50171
PRE4g3-TUS1-TRg-3	0.0536786	0.642048	0.0530779	0.416893
PRE4g3-OLE1-NRg-2	-0.108644	-1.43559	-0.107044	0.592261
PRE4g3-AFG2-TRg-1	0.0913082	1.12369	0.0949866	0.465899
PRE4g3-TOA2-NRg-1	0.123286	1.53298	0.124472	0.372771
PRE4g3-USO1-TRg-1	0.0737747	0.899267	0.0750155	0.596895
PRE4g3-UTP22-NRg-2	0.0130038	0.121434	0.0108245	0.978777
PRE4g3-RIB1-TRg-3	-0.0283804	-0.408262	-0.025059	0.763512
PRE4g3-RIB1-TRg-7	0.016111	0.161203	0.0193286	0.900103
PRE4g3-RIB1-TRg-4	0.0384772	0.447478	0.0409716	0.697785
PRE4g3-COG1-TRg-1	0.0718863	0.875097	0.0749937	0.616604
PRE4g3-RPL32-NRg-2	-0.0195233	-0.294896	-0.018199	0.884141
PRE4g3-GLC7-NRg-3	-0.0509654	-0.697337	-0.0530083	0.510727
PRE4g3-GLC7-NRg-4	-0.0145001	-0.230601	-0.013723	0.802969
PRE4g3-HSF1-TRg-2	0.0457056	0.539998	0.0437966	0.687519
PRE4g3-DAM1-NRg-5	0.0210749	0.224739	0.022351	0.616291
PRE4g3-SEC18-TRg-4	0.00427314	0.00968576	0.00458007	0.959696
PRE4g3-SEC18-TRg-5	0.092199	1.13509	0.0915147	0.438166
PRE4g3-PAB1-NRg-3	0.00347756	-0.000497195	0.0045295	0.970559
PRE4g3-POP8-TRg-2	-0.055667	-0.757514	-0.0562463	0.293476
PRE4g3-PAB1-NRg-4	0.101944	1.25982	0.103361	0.246487
PRE4g3-BIG1-TRg-4	-0.0896963	-1.19307	-0.0883786	0.287752
PRE4g3-BIG1-TRg-5	0.00281779	-0.00894186	0.00211932	0.922121
PRE4g3-BIG1-TRg-6	-0.194747	-2.53766	-0.194069	0.18545
PRE4g3-RPO41-NRg-1	0.0295199	0.33283	0.0300614	0.444438
PRE4g3-RVB2-NRg-2	-0.0360896	-0.506935	-0.037654	0.783708
PRE4g3-PET117-NRg-8	0.0457132	0.540096	0.0507524	0.764236
PRE4g3-VPS45-NRg-9	0.0117233	0.105044	0.0123657	0.947766
PRE4g3-YCG1-NRg-1	0.0870896	1.06969	0.0892118	0.352716
PRE4g3-NOC4-NRg-1	0.0543688	0.650882	0.0532255	0.662515
PRE4g3-NMD3-NRg-2	-0.112781	-1.48855	-0.114662	0.524374
PRE4g3-DRS1-TRg-2	0.0232545	0.252636	0.0223332	0.636461
PRE4g3-HTB1-NRg-2	0.0407882	0.477059	0.0416801	0.529889
PRE4g3-IPI1-TRg-2	0.0894253	1.09959	0.0887996	0.473553
PRE4g3-SEC18-NRg-1	0.0465506	0.550814	0.0500921	0.572359
PRE4g3-SEC18-NRg-2	-0.0260767	-0.378775	-0.0229856	0.860472
PRE4g3-JIP5-NRg-2	0.089117	1.09564	0.0873053	0.298391
PRE4g3-YPT1-TRg-3	0.0244024	0.267329	0.0274785	0.811902
PRE4g3-YPT1-TRg-2	0.0199215	0.209976	0.0236132	0.912784
PRE4g3-CLF1-NRg-2	-0.0784656	-1.04932	-0.074605	0.566452
PRE4g3-SNF2-NRg-7	-0.0447465	-0.617738	-0.0463947	0.268997
PRE4g3-SNF2-NRg-4	-0.124336	-1.63644	-0.126139	0.244004
PRE4g3-RPL25-NRg-1	-0.0542867	-0.739848	-0.0527467	0.736263
PRE4g3-NOP56-TRg-1	0.00606938	0.0326767	0.00382267	0.964591
PRE4g3-NOP56-TRg-2	0.0272831	0.3042	0.0266695	0.536652
PRE4g3-TRS31-TRg-1	0.0768297	0.938369	0.0808602	0.583992
PRE4g3-DBF4-TRg-2	-0.0894009	-1.18929	-0.0860031	0.464004
PRE4g3-DBF4-TRg-1	0.0104534	0.0887895	0.0130318	0.967148
PRE4g3-RPC19-TRg-4	0.0831895	1.01977	0.0824013	0.239486
PRE4g3-RPC19-TRg-6	0.0474246	0.562	0.0471515	0.78901
PRE4g3-RPC19-TRg-3	0.104252	1.28936	0.103135	0.281724
PRE4g3-ROK1-NRg-1	0.0446625	0.526647	0.0431998	0.479509
PRE4g3-CDC33-TRg-4	0.0879123	1.08022	0.0891104	0.555393
PRE4g3-DHR2-TRg-3	-0.114665	-1.51265	-0.115249	0.243315
PRE4g3-RRP42-NRg-5	0.0448017	0.528429	0.0434498	0.715417
PRE4g3-CLF1-TRg-1	-0.053489	-0.729637	-0.0488673	0.468274
PRE4g3-ERG11-NA-16	-0.0253198	-0.369088	-0.0255158	0.655642
PRE4g3-VAS1-NRg-4	0.0753086	0.918901	0.0775084	0.67039
PRE4g3-PIK1-NRg-2	-0.00449913	-0.102594	-0.00453274	0.836923
PRE4g3-SAR1-NRg-7	-0.0472682	-0.650014	-0.0496264	0.568735
PRE4g3-SAR1-NRg-4	0.0523058	0.624477	0.052982	0.486663
PRE4g3-RPS3-TRg-1	-0.0462093	-0.636462	-0.0455152	0.791104
PRE4g3-YTM1-TRg-2	0.0611685	0.737915	0.0602607	0.460165
PRE4g3-SUI3-NRg-5	0.01865	0.193702	0.0180885	0.774644
PRE4g3-SUI3-NRg-2	-0.0468016	-0.644043	-0.0466336	0.41853
PRE4g3-RRP7-TRg-4	0.0202831	0.214605	0.0191266	0.940871
PRE4g3-RRP7-TRg-6	-0.0722579	-0.969869	-0.0706694	0.392574
PRE4g3-NIP7-TRg-2	0.0486397	0.577553	0.0472452	0.363202
PRE4g3-MDM35-TRg-1	-0.0384615	-0.537294	-0.0390976	0.527119
PRE4g3-ALA1-NRg-1	0.00956236	0.0773849	0.00916751	0.958759
PRE4g3-DOA4-NRg-2	-0.0517385	-0.707232	-0.0553289	0.503784
PRE4g3-RPS13-NRg-1	0.0364889	0.422029	0.0377944	0.905229
PRE4g3-YSF3-TRg-2	0.0129673	0.120966	0.0124229	0.951485
PRE4g3-RPS2-NRg-11	-0.0952282	-1.26388	-0.094653	0.394835
PRE4g3-SSL1-TRg-10	0.00334722	-0.00216544	0.00333684	0.954705
PRE4g3-NIP7-TRg-1	-0.0109846	-0.185605	-0.0121649	0.888528
PRE4g3-LST8-NRg-1	0.0135581	0.128528	0.0159555	0.970398
PRE4g3-TAF4-TRg-3	0.00918886	0.0726043	0.0128956	0.943658
PRE4g3-HAS1-TRg-2	0.0525275	0.627315	0.0513873	0.777328
PRE4g3-GLC7-TRg-2	-0.0902896	-1.20066	-0.0852724	0.440221
PRE4g3-CDC45-NRg-1	0.0253813	0.279858	0.0271387	0.000356755
PRE4g3-SEC22-NRg-8	0.0994939	1.22846	0.0985273	0.661666
PRE4g3-YOS1-TRg-2	0.0242889	0.265877	0.0252554	0.742644
PRE4g3-RBA50-TRg-3	0.00855227	0.0644564	0.0068663	0.997356
PRE4g3-SPP41-NRg-2	-0.00586705	-0.120103	-0.00651451	0.891889
PRE4g3-PRP46-TRg-2	0.0345368	0.397044	0.0357383	0.728581
PRE4g3-PGA2-NRg-1	0.0349787	0.4027	0.0339961	0.271291
PRE4g3-CBF5-TRg-3	0.0308801	0.35024	0.0291468	0.760581
PRE4g3-TCP1-NRg-3	0.00103953	-0.0317025	-0.000672424	0.946025
PRE4g3-TCP1-NRg-2	0.0717844	0.873793	0.0730777	0.598819
PRE4g3-ERG26-NRg-2	-0.0195225	-0.294885	-0.0199818	0.740308
PRE4g3-ERG26-NRg-4	0.0239339	0.261333	0.0236808	0.806071
PRE4g3-MES1-TRg-5	-0.00906134	-0.160988	-0.00926448	0.860732
PRE4g3-HTS1-TRg-2	0.0836277	1.02538	0.0844109	0.495641
PRE4g3-SSS1-TRg-3	-0.0178157	-0.273039	-0.017595	0.519596
PRE4g3-SSS1-TRg-2	-0.0289291	-0.415284	-0.0292336	0.799685
PRE4g3-SYS1-TRg-7	0.0390084	0.454278	0.0395783	0.651262
PRE4g3-SYS1-TRg-2	0.0042749	0.00970831	0.00572346	0.981693
PRE4g3-SYS1-TRg-1	-0.00407775	-0.0972009	-0.00216421	0.93309
PRE4g3-BFR2-TRg-1	-0.0586556	-0.795767	-0.0596462	0.497885
PRE4g3-EOS1-TRg-3	-0.0884871	-1.17759	-0.0883743	0.491004
PRE4g3-TAF4-NRg-1	0.00513957	0.0207756	0.00908812	0.986763
PRE4g3-ARL3-NRg-8	0.0152075	0.149639	0.0153944	0.812626
PRE4g3-RPN5-NRg-1	0.019052	0.198847	0.0192783	0.93368
PRE4g3-TIM9-NRg-2	0.0263166	0.29183	0.0266184	0.738527
PRE4g3-NUP57-NRg-3	-0.0142469	-0.227361	-0.0126714	0.838776
PRE4g3-VPS4-TRg-1	-0.0181629	-0.277482	-0.0170742	0.909458
PRE4g3-CDC3-TRg-4	-0.0784009	-1.0485	-0.0790261	0.211242
PRE4g3-BBP1-NRg-1	0.0143512	0.138679	0.0128822	0.971167
PRE4g3-BBP1-NRg-2	-0.102532	-1.35736	-0.103192	0.406772
PRE4g3-USE1-NRg-3	0.0161319	0.161471	0.0151444	0.954705
PRE4g3-CCT7-TRg-1	0.086578	1.06314	0.0836483	0.57786
PRE4g3-SAH1-TRg-3	-0.0144458	-0.229906	-0.013881	0.67686
PRE4g3-CHS2-TRg-1	-0.142093	-1.86372	-0.141678	0.180326
PRE4g3-DPM1-TRg-2	-0.0142704	-0.227661	-0.0148049	0.924006
PRE4g3-BBP1-TRg-1	-0.0173251	-0.266759	-0.0128371	0.758918
PRE4g3-NRD1-TRg-4	0.121093	1.50492	0.122644	0.336889
PRE4g3-RPB3-NRg-1	-0.0407329	-0.566366	-0.0395972	0.597378
PRE4g3-PHO85-NRg-6	-0.00707967	-0.135624	-0.00566401	0.694544
PRE4g3-SNF6-TRg-6	-0.0910944	-1.21097	-0.0926624	0.367138
PRE4g3-PRP38-NRg-2	0.0557828	0.668981	0.0591095	0.781831
PRE4g3-OAR1-NRg-3	-0.0404794	-0.563122	-0.0424706	0.616787
PRE4g3-ROX3-NRg-1	0.0634525	0.767148	0.0610115	0.532791
PRE4g3-YPP1-TRg-6	0.0148655	0.145262	0.0148454	0.964086
PRE4g3-CBF2-NRg-8	0.0270086	0.300686	0.0251347	0.799894
PRE4g3-SPT6-TRg-5	-0.181735	-2.37111	-0.181649	0.256923
PRE4g3-SEC10-NRg-1	0.0221968	0.239099	0.0262211	0.913382
PRE4g3-NSL1-NRg-3	0.0426775	0.50124	0.0468919	0.817486
PRE4g3-NRD1-NRg-8	0.0673732	0.817331	0.0681114	0.479778
PRE4g3-RPB3-TRg-1	-0.0631654	-0.85349	-0.0614545	0.487835
PRE4g3-NRD1-NRg-4	0.060069	0.723841	0.0615362	0.515732
PRE4g3-RVB1-TRg-2	0.0848347	1.04083	0.0876515	0.479706
PRE4g3-TIF5-NRg-8	0.503127	6.39474	0.5048	0.0791855
PRE4g3-EOS1-NRg-1	-0.027238	-0.393639	-0.0254267	0.707058
PRE4g3-ERG25-NA-26	0.0239682	0.261772	0.0230314	0.711718
PRE4g3-MSL5-NRg-4	-0.0263163	-0.381842	-0.0301136	0.315413
PRE4g3-SEC24-TRg-2	0.0339726	0.389822	0.0382108	0.71969
PRE4g3-RPL30-NRg-5	-0.0489419	-0.671438	-0.047246	0.346001
PRE4g3-SNU71-NRg-3	0.0876964	1.07746	0.0865497	0.372033
PRE4g3-CDC33-NRg-1	-0.0792341	-1.05916	-0.0802707	0.666763
PRE4g3-RPN6-TRg-4	-0.0411934	-0.57226	-0.040301	0.664618
PRE4g3-NAB2-TRg-4	-0.0220123	-0.326753	-0.0197452	0.828614
PRE4g3-NAB2-TRg-6	0.0655943	0.794562	0.066443	0.291395
PRE4g3-YTM1-NRg-1	0.0323299	0.368797	0.0315365	0.72127
PRE4g3-OLE1-TRg-8	-0.0515826	-0.705236	-0.0515972	0.652828
PRE4g3-OLE1-TRg-1	0.101068	1.2486	0.0985958	0.693853
PRE4g3-UTP7-TRg-4	-0.0260159	-0.377997	-0.027444	0.481812
PRE4g3-ACT1-NRg-6	-0.170311	-2.2249	-0.164512	0.328115
PRE4g3-RPL18A-NRg-3	0.0206341	0.219097	0.0207616	0.861399
PRE4g3-BRX1-NRg-1	0.0067252	0.0410708	0.00593133	0.982347
PRE4g3-NAF1-TRg-8	-0.0563783	-0.766619	-0.0579441	0.691436
PRE4g3-NAF1-TRg-6	0.00660348	0.0395129	0.00347682	0.957995
PRE4g3-NAF1-TRg-4	0.0315459	0.358762	0.0290956	0.536052
PRE4g3-CDC8-TRg-2	0.0610966	0.736994	0.0594866	0.270292
PRE4g3-NSE4-TRg-1	0.0351521	0.40492	0.0352242	0.795024
PRE4g3-PAB1-NRg-2	0.0761951	0.930247	0.0790573	0.483777
PRE4g3-PRP43-TRg-4	-0.00360876	-0.0911981	-0.00246696	0.822395
PRE4g3-SEC2-NRg-3	-0.0217462	-0.323348	-0.0231895	0.710814
PRE4g3-SEC2-NRg-6	-0.0131239	-0.212987	-0.0145929	0.888254
PRE4g3-MPP10-NRg-5	-0.000649845	-0.0533256	-0.00196019	0.927694
PRE4g3-YDR355C-TRg-2	0.0422939	0.49633	0.0454227	0.397573
PRE4g3-YLR339C-TRg-9	-0.0390791	-0.545199	-0.0372485	0.654693
PRE4g3-SNM1-TRg-2	0.0594734	0.716218	0.0590727	0.321856
PRE4g3-ALR1-NRg-4	-0.101678	-1.34643	-0.101304	0.531373
PRE4g3-ALR1-NRg-1	-0.0333274	-0.47158	-0.0322779	0.568623
PRE4g3-ALR1-NRg-3	-0.0374713	-0.52462	-0.0374265	0.622343
PRE4g3-RPL10-TRg-1	-0.0203402	-0.305351	-0.0192121	0.563577
PRE4g3-RPL28-TRg-2	-0.0584266	-0.792836	-0.0582418	0.721873
PRE4g3-UTP25-TRg-1	-0.044105	-0.609527	-0.0448186	0.473119
PRE4g3-POB3-TRg-1	0.0915098	1.12627	0.0931852	0.255524
PRE4g3-POB3-TRg-3	0.0367555	0.425442	0.0393904	0.494721
PRE4g3-POB3-TRg-2	0.0711827	0.86609	0.0728254	0.504382
PRE4g3-MED11-TRg-1	0.0560088	0.671874	0.0555753	0.343008
PRE4g3-ISA1-TRg-15	-0.0382438	-0.534508	-0.0346228	0.777306
PRE4g3-RRP1-NRg-1	0.0549504	0.658326	0.0533734	0.396091
PRE4g3-MES1-NRg-1	-0.015943	-0.24907	-0.0140545	0.80708
PRE4g3-SEC13-NRg-5	-0.0312585	-0.4451	-0.0259967	0.776746
PRE4g3-MCM2-NRg-2	0.0970757	1.19751	0.0977324	0.365435
PRE4g3-ALA1-TRg-4	-0.0422111	-0.585287	-0.0399249	0.751623
PRE4g3-MTG2-TRg-5	0.0183674	0.190084	0.0212781	0.884961
PRE4g3-TIF35-NRg-3	-0.0164234	-0.255218	-0.0180561	0.773076
PRE4g3-NSE1-TRg-3	-0.0100851	-0.174091	-0.0116055	0.823646
PRE4g3-NSE1-TRg-4	-0.00226486	-0.073997	-0.00367009	0.940252
PRE4g3-MOB2-NRg-6	0.111556	1.38284	0.113642	0.57394
PRE4g3-VRG4-NRg-3	-0.13379	-1.75745	-0.132632	0.562014
PRE4g3-PRP9-TRg-3	0.042317	0.496626	0.0429494	0.64469
PRE4g3-HYM1-TRg-5	-0.0434914	-0.601673	-0.0421268	0.827174
PRE4g3-POP1-TRg-5	0.0241128	0.263622	0.024186	0.807221
PRE4g3-POP1-TRg-9	-0.0752675	-1.00839	-0.0771277	0.413175
PRE4g3-RPL17A-TRg-1	-0.0361866	-0.508177	-0.0364049	0.662641
PRE4g3-SLD2-TRg-1	0.00346702	-0.000632101	0.005658	0.974191
PRE4g3-CDC48-NRg-7	0.090916	1.11867	0.089277	0.444055
PRE4g3-FHL1-NRg-2	0.0182152	0.188136	0.015808	0.939751
PRE4g3-BET3-NRg-7	0.0298704	0.337316	0.028087	0.72682
PRE4g3-MAK21-TRg-1	0.00317233	-0.00440394	0.00231024	0.980087
PRE4g3-BRN1-TRg-4	0.0176689	0.181144	0.0205381	0.917523
PRE4g3-FBA1-NRg-3	-0.0179258	-0.274448	-0.0197943	0.658702
PRE4g3-CDC42-TRg-6	NA	NA	NA	NA
PRE4g3-CDC42-TRg-7	0.0171532	0.174544	0.0195846	0.940671
PRE4g3-COG4-NRg-1	0.0380417	0.441904	0.0360926	0.797584
PRE4g3-ATP3-NRg-3	-0.139329	-1.82835	-0.135034	0.364582
PRE4g3-ATP3-NRg-2	-0.113046	-1.49194	-0.109636	0.456215
PRE4g3-SMP3-TRg-5	-0.0560995	-0.763051	-0.0575598	0.429033
PRE4g3-CFT2-NRg-2	0.02252	0.243236	0.0254184	0.804831
PRE4g3-FAS2-TRg-5	0.0859565	1.05519	0.086576	0.541529
PRE4g3-DBP2-NRg-3	0.0350276	0.403326	0.0328948	0.77221
PRE4g3-DBP2-NRg-2	-0.014227	-0.227105	-0.0153097	0.770957
PRE4g3-MPS2-NRg-4	-0.0101767	-0.175264	-0.0110521	0.70921
PRE4g3-ARC35-TRg-2	-0.203673	-2.65191	-0.200903	0.257186
PRE4g3-ARC35-TRg-5	-0.318658	-4.12365	-0.314146	0.184068
PRE4g3-MRD1-TRg-1	-0.00742731	-0.140073	-0.00725387	0.859664
PRE4g3-RLP7-TRg-1	-0.0610916	-0.826946	-0.061301	0.629048
PRE4g3-SPC34-TRg-1	0.0153961	0.152054	0.0167961	0.259812
PRE4g3-CDC45-TRg-2	0.0872003	1.07111	0.0876419	0.385296
PRE4g3-GCD6-TRg-3	0.0288828	0.324676	0.0305045	0.627018
PRE4g3-GCD6-TRg-4	0.0556809	0.667676	0.0562244	0.736395
PRE4g3-YPT6-NRg-2	0.0665803	0.807183	0.0686214	0.550855
PRE4g3-RPS13-TRg-2	-0.0400218	-0.557265	-0.0398199	0.380311
PRE4g3-IPI3-TRg-3	0.00105591	-0.031493	-0.000543626	0.818627
PRE4g3-TIF5-NRg-9	0.023375	0.254179	0.0246484	0.888755
PRE4g3-TIF5-NRg-7	0.0819648	1.0041	0.0822341	0.418698
PRE4g3-TIF5-NRg-6	0.0807611	0.988689	0.0811604	0.281486
PRE4g3-NAB3-TRg-3	0.0217348	0.233185	0.0251108	0.84197
PRE4g3-GCD2-TRg-1	0.119175	1.48036	0.120613	0.293974
PRE4g3-UBA1-TRg-2	-0.00480094	-0.106457	-0.00295347	0.678928
PRE4g3-SLD3-TRg-6	0.0119866	0.108414	0.014435	0.683078
PRE4g3-LCB1-TRg-5	0.0568605	0.682775	0.0566496	0.486382
PRE4g3-TOA2-TRg-6	0.00456111	0.0133717	0.00764175	0.999374
PRE4g3-TOA2-TRg-1	-0.0299909	-0.428874	-0.0290084	0.493485
PRE4g3-TOA2-TRg-3	-0.0843316	-1.12441	-0.0837846	0.315413
PRE4g3-LSM2-TRg-1	-0.00857854	-0.154809	-0.0107717	0.671917
PRE4g3-YML6-TRg-13	-0.0735143	-0.98595	-0.0746466	0.631709
PRE4g3-YML6-TRg-12	-0.141099	-1.851	-0.141289	0.283733
PRE4g3-UTP15-NRg-1	0.0210488	0.224405	0.0212244	0.788446
PRE4g3-TIF6-NRg-8	-0.0112239	-0.188668	-0.0133092	0.558066
PRE4g3-SUP35-NRg-1	0.0282343	0.316376	0.0302451	0.765941
PRE4g3-MPP10-NRg-1	0.032073	0.365509	0.0315987	0.618146
PRE4g3-SWI3-TRg-7	-0.212876	-2.7697	-0.212283	0.326018
PRE4g3-SSN3-NRg-2	0.128235	1.59633	0.125184	0.216367
PRE4g3-SEC13-NRg-7	0.0850913	1.04411	0.0889699	0.387942
PRE4g3-RPS15-NRg-3	-0.0269224	-0.389599	-0.0270085	0.636608
PRE4g3-RPL3-TRg-2	-0.0532828	-0.726999	-0.051723	0.585157
PRE4g3-FBA1-NRg-2	0.000777969	-0.0350504	-0.00051169	0.908995
PRE4g3-FBA1-NRg-1	0.0218522	0.234688	0.0208917	0.841078
PRE4g3-FBA1-NRg-5	-0.0245454	-0.359175	-0.0262023	0.691042
PRE4g3-DAM1-TRg-2	-0.0113055	-0.189712	-0.00457447	0.873642
PRE4g3-NHP2-TRg-2	0.0210816	0.224825	0.0180065	0.883379
PRE4g3-HCA4-NRg-6	-0.036943	-0.517858	-0.0385498	0.447471
PRE4g3-PRE3-TRg-4	-0.016392	-0.254817	-0.0133822	0.828681
PRE4g3-DBP5-NRg-4	0.0959805	1.18349	0.0976028	0.429834
PRE4g3-SPT6-NRg-4	0.0362046	0.41839	0.0337668	0.486908
PRE4g3-SPT6-NRg-2	-0.0256801	-0.373698	-0.0274073	0.238786
PRE4g3-RPL18A-TRg-4	-0.0224708	-0.332622	-0.0217836	0.238452
PRE4g3-KSH1-TRg-1	-0.0719699	-0.966182	-0.0694885	0.445153
PRE4g3-KSH1-TRg-3	0.0313392	0.356116	0.0304003	0.766711
PRE4g3-IPI3-NRg-1	0.008084	0.0584628	0.00721496	0.996669
PRE4g3-PGA2-TRg-8	-0.00700481	-0.134666	-0.00902148	0.516909
PRE4g3-RPL18A-TRg-2	0.0720764	0.877529	0.0717849	0.612071
PRE4g3-RPL33A-NRg-6	-0.0522455	-0.713721	-0.0522477	0.672201
PRE4g3-TAF12-NRg-2	-0.00664406	-0.130048	-0.00543443	0.922214
PRE4g3-USE1-TRg-5	0.076976	0.940243	0.0753922	0.501466
PRE4g3-YNL114C-TRg-1	-0.0139296	-0.223299	-0.0150698	0.390953
PRE4g3-SMC5-TRg-7	-0.0698545	-0.939107	-0.0716963	0.681082
PRE4g3-SMC5-TRg-6	-0.0018992	-0.0693167	-0.00367522	0.840349
PRE4g3-RSC58-TRg-1	0.0577623	0.694318	0.0570294	0.655649
PRE4g3-CTF13-TRg-2	0.0984237	1.21476	0.101141	0.366616
PRE4g3-NAB2-NRg-2	0.0866615	1.06421	0.0883611	0.528088
PRE4g3-MCM7-TRg-4	-0.0919024	-1.22131	-0.0883586	0.297112
PRE4g3-BCP1-NRg-5	0.0332615	0.380721	0.0340524	0.701544
PRE4g3-STU2-TRg-3	0.0284374	0.318975	0.030713	0.905442
PRE4g3-SEC21-NRg-6	0.040966	0.479334	0.0413302	0.744189
PRE4g3-SEC21-NRg-3	-0.0242046	-0.354813	-0.0223116	0.381929
PRE4g3-RPL1B-TRg-3	-0.0457468	-0.630542	-0.0458549	0.61308
PRE4g3-SEC20-NRg-2	0.024348	0.266633	0.0246223	0.861127
PRE4g3-VMA3-NRg-2	0.0688227	0.835885	0.0688112	0.448012
PRE4g3-SEC23-NRg-5	-0.0288544	-0.414328	-0.0311888	0.328744
PRE4g3-CDC28-TRg-4	-0.0425218	-0.589264	-0.0455295	0.611246
PRE4g3-RPN12-NRg-11	-0.0222759	-0.330128	-0.0238679	0.471986
PRE4g3-PUP3-TRg-3	0.107142	1.32635	0.109097	0.532847
PRE4g3-SEC31-TRg-2	0.0586432	0.705592	0.0627314	0.664351
PRE4g3-SED5-TRg-6	0.0104515	0.0887658	0.0106045	0.970941
PRE4g3-SED5-TRg-5	-0.0366761	-0.514442	-0.0373394	0.735858
PRE4g3-RPL33A-TRg-1	0.0302291	0.341908	0.0290826	0.684047
PRE4g3-RPL33A-TRg-2	-0.0809811	-1.08152	-0.0818979	0.634527
PRE4g3-MRPL11-TRg-2	0.0836915	1.0262	0.0844881	0.536807
PRE4g3-RTP1-NRg-2	-0.052641	-0.718783	-0.0532403	0.470851
PRE4g3-NUG1-TRg-2	0.0361769	0.418037	0.0358469	0.749344
PRE4g3-VPH2-TRg-4	-0.0597228	-0.809427	-0.0632878	0.78758
PRE4g3-COP1-NRg-3	0.0331293	0.379029	0.0357027	0.737773
PRE4g3-CRM1-NRg-1	-0.0024401	-0.0762399	-0.00220033	0.931268
PRE4g3-RPL5-NRg-4	-0.0709037	-0.952535	-0.068817	0.497457
PRE4g3-SNU13-NRg-4	NA	NA	NA	NA
PRE4g3-PFS2-TRg-3	-0.0519988	-0.710564	-0.0477875	0.347795
PRE4g3-MPP10-TRg-2	0.0104442	0.0886713	0.0093991	0.976062
PRE4g3-TSR4-NRg-2	0.0601203	0.724498	0.0588226	0.664534
PRE4g3-RSC2-TRg-1	0.0848028	1.04042	0.082595	0.176574
PRE4g3-SEC65-TRg-2	0.0298906	0.337575	0.0274312	0.862011
PRE4g3-SMI1-NRg-1	-0.0404413	-0.562634	-0.0418046	0.837703
PRE4g3-RTT105-NRg-4	-0.0562242	-0.764647	-0.0567286	0.519899
PRE4g3-VMA5-TRg-3	0.0373814	0.433453	0.0367066	0.713269
PRE4g3-VMA5-TRg-5	-0.00811361	-0.148858	-0.00902967	0.865011
PRE4g3-RRP1-TRg-3	0.0218159	0.234223	0.02091	0.912791
PRE4g3-CLC1-TRg-2	0.0241573	0.264191	0.0268831	0.900459
PRE4g3-GCD6-NRg-1	0.0316211	0.359724	0.0339152	0.699959
PRE4g3-GCD6-NRg-2	0.0513014	0.611621	0.0525226	0.696109
PRE4g3-PXR1-TRg-1	0.0388248	0.451928	0.0375769	0.371049
PRE4g3-CDC14-NRg-1	0.0480272	0.569713	0.0476822	0.786861
PRE4g3-PCF11-TRg-6	0.000503565	-0.0385626	0.00373255	0.970804
PRE4g3-PCF11-TRg-5	-0.0191222	-0.289761	-0.0153699	0.872967
PRE4g3-PCF11-TRg-4	-0.0911369	-1.21151	-0.0869134	0.218991
PRE4g3-SEC31-NRg-1	-0.0901244	-1.19855	-0.085899	0.336522
PRE4g3-RRP5-NRg-1	0.0485584	0.576513	0.0480476	0.3394
PRE4g3-PRE10-TRg-5	-0.0220198	-0.326849	-0.0204786	0.720287
PRE4g3-PRE10-TRg-1	-0.03359	-0.474942	-0.031483	0.303141
PRE4g3-RPS5-TRg-2	-0.0665412	-0.896699	-0.0657337	0.269347
PRE4g3-NSP1-TRg-4	0.0305204	0.345636	0.0332284	0.664005
[truncated: 13,201 more rows]

## Sheet: ypd37c
strain	gi_score_method1	zscore_method1	gi_score_method2	qval_method2
PRE7g7-RPL15A-NRg-4	NA	NA	NA	NA
PRE7g7-RPL15A-NRg-5	0.0273536	0.305103	0.028042	0.594172
PRE7g7-KRE33-TRg-1	-0.0286137	-0.411248	-0.0276784	0.742043
PRE7g7-PMI40-NRg-1	0.0113804	0.100655	0.0125701	0.935548
PRE7g7-NOP19-NRg-3	-0.00248348	-0.0767951	-0.00154202	0.994922
PRE7g7-SRP14-NRg-4	-0.00791412	-0.146304	-0.00686005	0.981111
PRE7g7-SEC27-TRg-2	0.0253022	0.278846	0.0254102	0.923949
PRE7g7-GPI14-TRg-3	0.0513263	0.61194	0.0520432	0.803656
PRE7g7-PAH1-TRg-7	0.113123	1.40291	0.11282	0.267933
PRE7g7-PAH1-TRg-6	0.0593623	0.714796	0.0589563	0.664351
PRE7g7-PAH1-TRg-5	0.175046	2.19548	0.175213	0.486127
PRE7g7-PAH1-TRg-3	0.141883	1.77102	0.142679	0.500189
PRE7g7-COG3-TRg-1	-0.0111804	-0.188111	-0.0104706	0.959384
PRE7g7-HTS1-NRg-5	0.0644278	0.779632	0.0651811	0.53702
PRE7g7-MSN5-TRg-7	NA	NA	NA	NA
PRE7g7-ERG26-TRg-1	-0.0570785	-0.775581	-0.0562021	0.785371
PRE7g7-SMD2-TRg-5	0.0178676	0.183687	0.018735	0.930301
PRE7g7-SMD2-TRg-4	0.106378	1.31658	0.107472	0.491303
PRE7g7-SMD2-TRg-1	0.0500264	0.595302	0.0513213	0.740065
PRE7g7-PRE7-TRg-4	-0.0940095	-1.24828	-0.0934624	0.665775
PRE7g7-PRE7-TRg-7	-0.152406	-1.99572	-0.151099	0.287017
PRE7g7-SEC6-TRg-3	-0.00136936	-0.062535	-0.000530224	0.997684
PRE7g7-ESF2-NRg-1	NA	NA	NA	NA
PRE7g7-ESF2-NRg-3	0.0144004	0.139309	0.0151627	0.876526
PRE7g7-AFG2-TRg-2	0.0478408	0.567328	0.0490257	0.830288
PRE7g7-RRP36-TRg-3	-0.00917353	-0.162424	-0.00844024	0.978527
PRE7g7-RRP36-TRg-5	0.0214152	0.229095	0.022536	0.763877
PRE7g7-GCR1-NRg-2	-0.00312572	-0.0850154	-0.00245339	0.985312
PRE7g7-PRE4-NRg-4	-0.0935149	-1.24195	-0.0930273	0.523332
PRE7g7-PRE4-NRg-9	-0.0743208	-0.996272	-0.0737237	0.743358
PRE7g7-DSN1-NRg-2	-0.0045603	-0.103377	-0.00332823	0.991697
PRE7g7-GPI11-TRg-3	-0.188606	-2.45906	-0.188337	0.479188
PRE7g7-POP3-TRg-1	-0.0168879	-0.261164	-0.015505	0.507231
PRE7g7-MNE1-TRg-5	-0.0575826	-0.782034	-0.0574534	0.827833
PRE7g7-RRP12-NRg-1	0.0538516	0.644263	0.0548936	0.60187
PRE7g7-RSC6-TRg-2	0.110402	1.36807	0.11135	0.511489
PRE7g7-CDC25-TRg-1	0.0910083	1.11985	0.0912275	0.580586
PRE7g7-CDC25-TRg-9	-0.154776	-2.02606	-0.154979	0.504139
PRE7g7-YPP1-NRg-3	0.0726193	0.884479	0.0732892	0.554306
PRE7g7-NFS1-NRg-9	-0.0291037	-0.417519	-0.0285378	0.81364
PRE7g7-NFS1-NRg-8	0.0166513	0.16812	0.017203	0.538727
PRE7g7-UBA2-TRg-1	-0.0465034	-0.640226	-0.0459161	0.820529
PRE7g7-ARP2-NRg-3	0.0564328	0.677301	0.0565739	0.668064
PRE7g7-MAK16-TRg-1	-0.0270788	-0.391602	-0.0263	0.90881
PRE7g7-CEP3-NRg-1	-0.0351536	-0.494955	-0.034452	0.822107
PRE7g7-GUK1-TRg-5	0.02408	0.263202	0.0248656	0.592832
PRE7g7-GUK1-TRg-2	0.013901	0.132917	0.0150258	0.661378
PRE7g7-GPI12-NRg-6	-0.049375	-0.676981	-0.0485662	0.812709
PRE7g7-RPS5-NRg-5	0.0194716	0.204218	0.020089	0.923316
PRE7g7-RPS5-NRg-2	0.0155248	0.1537	0.0167902	0.915166
PRE7g7-RPC19-NRg-1	-0.0216214	-0.32175	-0.0207845	0.711314
PRE7g7-TIM54-TRg-1	0.0632329	0.764338	0.0645532	0.18545
PRE7g7-TEN1-TRg-2	0.0659183	0.798709	0.0668169	0.496107
PRE7g7-SAH1-NRg-4	-0.141365	-1.8544	-0.140394	0.661459
PRE7g7-SAH1-NRg-5	NA	NA	NA	NA
PRE7g7-SAH1-NRg-3	NA	NA	NA	NA
PRE7g7-ATP15-NRg-5	NA	NA	NA	NA
PRE7g7-SCD5-TRg-5	0.00478547	0.0162433	0.00546337	0.981171
PRE7g7-ARB1-NRg-2	-0.0121827	-0.200939	-0.0107646	0.961639
PRE7g7-ARB1-NRg-4	0.0670611	0.813337	0.067895	0.706329
PRE7g7-PUP2-TRg-1	0.0519965	0.620518	0.0531292	0.672964
PRE7g7-CCT8-TRg-2	NA	NA	NA	NA
PRE7g7-MCM4-TRg-1	0.0143049	0.138087	0.014752	0.867513
PRE7g7-LSM4-TRg-1	-0.179021	-2.33638	-0.177175	0.212317
PRE7g7-NOP53-NRg-1	-0.0753482	-1.00942	-0.0745992	0.48094
PRE7g7-ATP3-TRg-4	-0.047636	-0.654722	-0.0466442	0.75574
PRE7g7-AFG2-NRg-3	0.0506502	0.603286	0.0518779	0.607125
PRE7g7-PRO3-NRg-3	-0.0131193	-0.212928	-0.0118872	0.815972
PRE7g7-NRD1-NRg-10	0.124422	1.54753	0.124859	0.299945
PRE7g7-SEC61-TRg-2	0.0615211	0.742428	0.0624202	0.487731
PRE7g7-RHO3-TRg-4	0.0645504	0.781201	0.0658076	0.483823
PRE7g7-SNF2-TRg-6	-0.0901746	-1.19919	-0.0888183	0.592587
PRE7g7-SMD2-NRg-3	0.109084	1.3512	0.110237	0.598384
PRE7g7-RSC4-TRg-2	0.0702197	0.853765	0.0708771	0.684752
PRE7g7-RSC4-TRg-1	0.0823425	1.00893	0.0825601	0.673652
PRE7g7-TIF34-TRg-2	-0.120878	-1.59218	-0.120183	0.493764
PRE7g7-BET1-NRg-1	0.0904994	1.11333	0.0907857	0.434378
PRE7g7-CDC8-NRg-2	0.028897	0.324857	0.030052	0.821335
PRE7g7-PRP42-TRg-2	0.073081	0.890388	0.0742607	0.254001
PRE7g7-RRB1-TRg-2	NA	NA	NA	NA
PRE7g7-SPC24-TRg-1	-0.045815	-0.631414	-0.0452869	0.463041
PRE7g7-ILS1-NRg-1	0.00810628	0.0587479	0.00903537	0.911477
PRE7g7-GFA1-TRg-2	0.0484347	0.574929	0.0493935	0.613206
PRE7g7-SEC21-NRg-10	-0.104619	-1.38407	-0.103757	0.598428
PRE7g7-RPC10-NRg-1	0.0382841	0.445007	0.0391533	0.596573
PRE7g7-RPB10-TRg-3	0.0428535	0.503493	0.0437793	0.79938
PRE7g7-RPB10-TRg-2	0.0353359	0.407272	0.0366257	0.892145
PRE7g7-YNL181W-TRg-1	0.0025236	-0.0127074	0.0037799	0.971734
PRE7g7-RAD3-NRg-1	-0.0477365	-0.656009	-0.0466272	0.754744
PRE7g7-NOP10-TRg-1	0.0683052	0.82926	0.0694748	0.58263
PRE7g7-BFR2-TRg-3	0.0646613	0.78262	0.0653925	0.532382
PRE7g7-MCM2-TRg-6	0.0574384	0.690172	0.0585876	0.442494
PRE7g7-MCM2-TRg-4	NA	NA	NA	NA
PRE7g7-MPP10-TRg-1	0.0629218	0.760356	0.0640004	0.380986
PRE7g7-RET2-TRg-4	0.0619611	0.748059	0.0626343	0.620973
PRE7g7-RET2-TRg-1	NA	NA	NA	NA
PRE7g7-RPS2-NRg-1	-0.0709376	-0.95297	-0.0704913	0.693212
PRE7g7-RPS2-NRg-2	-0.125306	-1.64886	-0.124394	0.211242
PRE7g7-ORC4-NRg-3	-0.0129328	-0.210541	-0.0117697	0.90758
PRE7g7-TIP20-TRg-7	0.0656321	0.795047	0.0665806	0.357365
PRE7g7-SMT3-TRg-1	-0.0888195	-1.18185	-0.0883099	0.656225
PRE7g7-MSS18-NRg-6	0.0610808	0.736793	0.0620888	0.579341
PRE7g7-YEF3-NRg-9	-0.146748	-1.9233	-0.147616	0.278051
PRE7g7-ASK1-NRg-1	-0.137821	-1.80905	-0.136769	0.388087
PRE7g7-SMC1-TRg-1	-0.0481286	-0.661027	-0.0475458	0.320176
PRE7g7-NIP1-NRg-1	-0.12204	-1.60705	-0.120797	0.359764
PRE7g7-RPP1-NRg-1	NA	NA	NA	NA
PRE7g7-YDJ1-TRg-6	-0.0900638	-1.19777	-0.0897288	0.673272
PRE7g7-SUB2-NRg-1	-0.0367751	-0.515709	-0.0357808	0.607215
PRE7g7-TIM10-NRg-8	0.110908	1.37455	0.110821	0.637227
PRE7g7-TIM10-NRg-4	-0.0718664	-0.964858	-0.0712922	0.798384
PRE7g7-TIM10-NRg-7	-0.0660455	-0.890354	-0.0657049	0.468274
PRE7g7-SKI6-TRg-4	-0.00539011	-0.113998	-0.0043325	0.940349
PRE7g7-TUB4-TRg-1	-0.0462127	-0.636505	-0.0450062	0.717436
PRE7g7-CDC37-NRg-2	-0.133208	-1.74999	-0.132646	0.294647
PRE7g7-ISD11-TRg-3	-0.0307507	-0.4386	-0.0298004	0.92658
PRE7g7-YOS1-TRg-4	-0.0388876	-0.542747	-0.0375952	0.458863
PRE7g7-SSC1-TRg-6	0.085314	1.04696	0.0856399	0.587844
PRE7g7-MTR3-TRg-5	0.03147	0.35779	0.0321977	0.481812
PRE7g7-MTR3-TRg-6	0.0483112	0.573349	0.0495687	0.610525
PRE7g7-TFA1-TRg-2	0.0411434	0.481604	0.0422456	0.847859
PRE7g7-CDC3-NRg-3	-0.00279883	-0.0808315	-0.00263687	0.994212
PRE7g7-ERG25-TA-18	NA	NA	NA	NA
PRE7g7-RPB11-TRg-4	-0.0149646	-0.236546	-0.0141144	0.943208
PRE7g7-RPB11-TRg-1	0.00403131	0.00659047	0.00405386	0.890099
PRE7g7-RPB11-TRg-2	0.0353135	0.406985	0.03594	0.701042
PRE7g7-DED1-TRg-3	0.0391091	0.455566	0.0402157	0.859684
PRE7g7-DED1-TRg-1	0.0581999	0.699918	0.0594951	0.486475
PRE7g7-DED1-TRg-6	-0.122877	-1.61776	-0.121569	0.440423
PRE7g7-DED1-TRg-4	-0.0468415	-0.644553	-0.0458275	0.788475
PRE7g7-RPL10-NRg-5	0.0192348	0.201186	0.0199496	0.870389
PRE7g7-RPL10-NRg-4	0.0408268	0.477552	0.041741	0.736471
PRE7g7-EFB1-NRg-1	0.0020213	-0.0191365	0.0027246	0.97227
PRE7g7-EFB1-NRg-5	NA	NA	NA	NA
PRE7g7-EFB1-NRg-4	0.112366	1.39321	0.113517	0.495496
PRE7g7-RPT3-NRg-1	-0.00307746	-0.0843978	-0.00169254	0.992873
PRE7g7-SAC6-TRg-8	-0.0871799	-1.16086	-0.0878613	0.607533
PRE7g7-SAC6-TRg-4	-0.159487	-2.08635	-0.158884	0.342717
PRE7g7-SAC6-TRg-5	0.0457669	0.540783	0.0455028	0.775251
PRE7g7-SAC6-TRg-3	-0.0251445	-0.366843	-0.0242084	0.577278
PRE7g7-DIM1-TRg-5	0.128944	1.6054	0.129638	0.34195
PRE7g7-DIM1-TRg-7	-0.0681887	-0.917785	-0.0672014	0.76369
PRE7g7-RPC17-NRg-1	-0.0167021	-0.258786	-0.0154993	0.840183
PRE7g7-RPC17-NRg-2	0.0678908	0.823957	0.06902	0.646011
PRE7g7-YDR341C-TRg-1	-0.0374068	-0.523794	-0.0364499	0.545233
PRE7g7-RAP1-NRg-8	-0.00114159	-0.0596197	0.000237621	0.964802
PRE7g7-RAP1-NRg-5	-0.137185	-1.8009	-0.136145	0.45068
PRE7g7-RAP1-NRg-2	-0.0400863	-0.558091	-0.0390376	0.630199
PRE7g7-SEC26-NRg-3	0.0265212	0.294449	0.0276186	0.805604
PRE7g7-SPP41-TRg-3	0.0352074	0.405627	0.0356608	0.596791
PRE7g7-TAP42-NRg-1	0.0743118	0.906142	0.0753963	0.617814
PRE7g7-PGA2-TRg-6	-0.0114799	-0.191944	-0.0103403	0.694705
PRE7g7-BRL1-TRg-1	0.0503477	0.599415	0.0506428	0.76692
PRE7g7-FOL2-TRg-1	0.00637785	0.036625	0.00746692	0.937228
PRE7g7-NAB3-NRg-5	-0.0714173	-0.95911	-0.0706634	0.303149
PRE7g7-SNF4-TRg-4	-0.0354364	-0.498575	-0.0354967	0.737823
PRE7g7-HRR25-TRg-2	-0.0944765	-1.25425	-0.0943012	0.391665
PRE7g7-TRS23-TRg-4	0.00654862	0.0388107	0.00604782	0.976518
PRE7g7-CTR86-TRg-4	0.0128747	0.119781	0.0138858	0.844149
PRE7g7-RPB5-TRg-5	-0.0399749	-0.556664	-0.0403004	0.475908
PRE7g7-SPN1-NRg-2	-0.0413518	-0.574288	-0.0425617	0.733846
PRE7g7-SPN1-NRg-1	-0.0190035	-0.288242	-0.0192944	0.740543
PRE7g7-SEC61-NRg-1	-0.0339145	-0.479095	-0.0327423	0.572352
PRE7g7-SEC61-NRg-7	-0.0770362	-1.03103	-0.0760532	0.615998
PRE7g7-TUS1-TRg-3	0.0665331	0.806579	0.0668248	0.631243
PRE7g7-OLE1-NRg-2	0.0589608	0.709657	0.0600734	0.721023
PRE7g7-AFG2-TRg-1	0.000857134	-0.0340372	0.00128203	0.982255
PRE7g7-TOA2-NRg-1	0.0899824	1.10672	0.0902918	0.309907
PRE7g7-USO1-TRg-1	0.0697848	0.848198	0.0701482	0.664441
PRE7g7-UTP22-NRg-2	0.0390542	0.454864	0.0406405	0.81925
PRE7g7-RIB1-TRg-3	0.00213664	-0.0176602	0.0033922	0.978303
PRE7g7-RIB1-TRg-7	0.00265848	-0.0109809	0.00341667	0.938584
PRE7g7-RIB1-TRg-4	-0.0136947	-0.220292	-0.0130747	0.919514
PRE7g7-COG1-TRg-1	-0.0427167	-0.591758	-0.0429291	0.715498
PRE7g7-RPL32-NRg-2	-0.13813	-1.813	-0.137534	0.524493
PRE7g7-GLC7-NRg-3	0.0436946	0.514258	0.0438849	0.829802
PRE7g7-GLC7-NRg-4	NA	NA	NA	NA
PRE7g7-HSF1-TRg-2	0.086931	1.06766	0.0875092	0.658719
PRE7g7-DAM1-NRg-5	-0.00556126	-0.116189	-0.00452802	0.961569
PRE7g7-SEC18-TRg-4	0.0371349	0.430298	0.0379852	0.7866
PRE7g7-SEC18-TRg-5	NA	NA	NA	NA
PRE7g7-PAB1-NRg-3	0.00428358	0.00981947	0.00454841	0.982768
PRE7g7-POP8-TRg-2	0.00894075	0.0694286	0.00942038	0.953733
PRE7g7-PAB1-NRg-4	0.0543984	0.651261	0.0545789	0.635172
PRE7g7-BIG1-TRg-4	-0.066754	-0.899422	-0.0662503	0.256111
PRE7g7-BIG1-TRg-5	-0.0654071	-0.882182	-0.0646149	0.693002
PRE7g7-BIG1-TRg-6	-0.0473412	-0.650949	-0.0463948	0.320042
PRE7g7-RPO41-NRg-1	0.0286202	0.321315	0.0295872	0.736592
PRE7g7-RVB2-NRg-2	-0.0636827	-0.860111	-0.063386	0.585074
PRE7g7-PET117-NRg-8	0.0334306	0.382885	0.0335072	0.753891
PRE7g7-VPS45-NRg-9	0.090182	1.10927	0.0902108	0.220365
PRE7g7-YCG1-NRg-1	0.0330169	0.37759	0.0340967	0.514831
PRE7g7-NOC4-NRg-1	-0.00708812	-0.135732	-0.00590946	0.97505
PRE7g7-NMD3-NRg-2	-0.00620623	-0.124444	-0.00544882	0.979906
PRE7g7-DRS1-TRg-2	0.0204345	0.216542	0.0214797	0.712015
PRE7g7-HTB1-NRg-2	0.0848509	1.04104	0.0853435	0.383742
PRE7g7-IPI1-TRg-2	-0.0749608	-1.00446	-0.0740281	0.443798
PRE7g7-SEC18-NRg-1	0.0995439	1.2291	0.100105	0.277871
PRE7g7-SEC18-NRg-2	0.00547553	0.0250757	0.00593156	0.956273
PRE7g7-JIP5-NRg-2	-0.0911699	-1.21193	-0.0898827	0.612172
PRE7g7-YPT1-TRg-3	0.00609781	0.0330406	0.00589636	0.948321
PRE7g7-YPT1-TRg-2	0.103437	1.27892	0.102554	0.286192
PRE7g7-CLF1-NRg-2	0.0602548	0.72622	0.0615415	0.426207
PRE7g7-SNF2-NRg-7	0.128456	1.59915	0.128706	0.303824
PRE7g7-SNF2-NRg-4	-0.13466	-1.76858	-0.133398	0.214337
PRE7g7-RPL25-NRg-1	0.0277773	0.310525	0.0280956	0.621733
PRE7g7-NOP56-TRg-1	0.0111723	0.0979913	0.0125155	0.952454
PRE7g7-NOP56-TRg-2	NA	NA	NA	NA
PRE7g7-TRS31-TRg-1	0.0290958	0.327402	0.0288251	0.849365
PRE7g7-DBF4-TRg-2	-0.0889508	-1.18353	-0.0881867	0.55056
PRE7g7-DBF4-TRg-1	0.140817	1.75737	0.141853	0.479572
PRE7g7-RPC19-TRg-4	-0.0323793	-0.459445	-0.0313404	0.792091
PRE7g7-RPC19-TRg-6	0.0757161	0.924117	0.076674	0.580634
PRE7g7-RPC19-TRg-3	0.0557834	0.668989	0.0566688	0.853218
PRE7g7-ROK1-NRg-1	0.0746182	0.910063	0.0754824	0.540114
PRE7g7-CDC33-TRg-4	-0.0673596	-0.907173	-0.0656606	0.633514
PRE7g7-DHR2-TRg-3	0.0490487	0.582788	0.0493479	0.519649
PRE7g7-RRP42-NRg-5	0.0476171	0.564464	0.048983	0.472728
PRE7g7-CLF1-TRg-1	-0.0566929	-0.770646	-0.0556915	0.638938
PRE7g7-ERG11-NA-16	-0.0765092	-1.02428	-0.0759474	0.44763
PRE7g7-VAS1-NRg-4	0.0412164	0.482539	0.0420721	0.731219
PRE7g7-PIK1-NRg-2	0.108065	1.33817	0.108924	0.606254
PRE7g7-SAR1-NRg-7	-0.0464339	-0.639336	-0.0461716	0.292442
PRE7g7-SAR1-NRg-4	0.0121797	0.110885	0.0128625	0.831623
PRE7g7-RPS3-TRg-1	-0.0627311	-0.847931	-0.0619813	0.504761
PRE7g7-YTM1-TRg-2	0.0718742	0.874942	0.072763	0.635664
PRE7g7-SUI3-NRg-5	-0.0476548	-0.654963	-0.0467569	0.631953
PRE7g7-SUI3-NRg-2	-0.0359097	-0.504632	-0.034984	0.868755
PRE7g7-RRP7-TRg-4	-0.0714116	-0.959037	-0.070363	0.621973
PRE7g7-RRP7-TRg-6	-0.112363	-1.48319	-0.111207	0.31751
PRE7g7-NIP7-TRg-2	NA	NA	NA	NA
PRE7g7-MDM35-TRg-1	-0.0177119	-0.271711	-0.0168297	0.954907
PRE7g7-ALA1-NRg-1	0.0884478	1.08707	0.0893247	0.578313
PRE7g7-DOA4-NRg-2	0.130654	1.62729	0.131697	0.518615
PRE7g7-RPS13-NRg-1	-0.112097	-1.47978	-0.111543	0.547731
PRE7g7-YSF3-TRg-2	0.0654272	0.792424	0.0665481	0.256923
PRE7g7-RPS2-NRg-11	-0.0759382	-1.01697	-0.0755986	0.363739
PRE7g7-SSL1-TRg-10	0.0557781	0.66892	0.0569404	0.30141
PRE7g7-NIP7-TRg-1	0.0849271	1.04201	0.0861019	0.459301
PRE7g7-LST8-NRg-1	-0.158139	-2.06909	-0.158154	0.152379
PRE7g7-TAF4-TRg-3	0.00843812	0.0629953	0.00801003	0.970093
PRE7g7-HAS1-TRg-2	0.106634	1.31985	0.107841	0.247291
PRE7g7-GLC7-TRg-2	NA	NA	NA	NA
PRE7g7-CDC45-NRg-1	-0.0174189	-0.267961	-0.0162623	0.829303
PRE7g7-SEC22-NRg-8	NA	NA	NA	NA
PRE7g7-YOS1-TRg-2	0.0431895	0.507793	0.0447423	0.87173
PRE7g7-RBA50-TRg-3	-0.0696995	-0.937122	-0.0687775	0.460432
PRE7g7-SPP41-NRg-2	0.0497281	0.591484	0.0508221	0.676014
PRE7g7-PRP46-TRg-2	-0.0716192	-0.961694	-0.0707181	0.721802
PRE7g7-PGA2-NRg-1	NA	NA	NA	NA
PRE7g7-CBF5-TRg-3	0.0186202	0.193321	0.0199126	0.84764
PRE7g7-TCP1-NRg-3	0.0689152	0.837068	0.069535	0.43602
PRE7g7-TCP1-NRg-2	0.0164005	0.164909	0.0169532	0.785371
PRE7g7-ERG26-NRg-2	-0.0519729	-0.710232	-0.0512019	0.491004
PRE7g7-ERG26-NRg-4	-0.0143203	-0.2283	-0.0135278	0.539956
PRE7g7-MES1-TRg-5	-0.116693	-1.53862	-0.115888	0.48146
PRE7g7-HTS1-TRg-2	-0.00540508	-0.11419	-0.0044836	0.978556
PRE7g7-SSS1-TRg-3	0.0286899	0.322206	0.0290713	0.710433
PRE7g7-SSS1-TRg-2	0.116264	1.44311	0.116685	0.326028
PRE7g7-SYS1-TRg-7	-0.031342	-0.446168	-0.0313237	0.824878
PRE7g7-SYS1-TRg-2	0.0218816	0.235064	0.0215004	0.242322
PRE7g7-SYS1-TRg-1	-0.0195736	-0.29554	-0.0190218	0.937694
PRE7g7-BFR2-TRg-1	0.110632	1.37101	0.111643	0.219436
PRE7g7-EOS1-TRg-3	-0.011683	-0.194544	-0.0110862	0.911477
PRE7g7-TAF4-NRg-1	0.040806	0.477285	0.0412495	0.853569
PRE7g7-ARL3-NRg-8	-0.00540212	-0.114152	-0.00399944	0.972262
PRE7g7-RPN5-NRg-1	0.00874385	0.0669084	0.0097913	0.954867
PRE7g7-TIM9-NRg-2	-0.0329533	-0.466792	-0.0320761	0.779445
PRE7g7-NUP57-NRg-3	0.0312673	0.355196	0.031454	0.74974
PRE7g7-VPS4-TRg-1	NA	NA	NA	NA
PRE7g7-CDC3-TRg-4	-0.20214	-2.63228	-0.201736	0.395355
PRE7g7-BBP1-NRg-1	0.0250794	0.275994	0.0258936	0.780372
PRE7g7-BBP1-NRg-2	-0.064766	-0.873976	-0.0639689	0.708022
PRE7g7-USE1-NRg-3	0.0414927	0.486075	0.0428456	0.615136
PRE7g7-CCT7-TRg-1	NA	NA	NA	NA
PRE7g7-SAH1-TRg-3	0.0270798	0.301598	0.0278012	0.796516
PRE7g7-CHS2-TRg-1	0.0749589	0.914424	0.0757479	0.540161
PRE7g7-DPM1-TRg-2	0.00709651	0.0458234	0.00833638	0.800797
PRE7g7-BBP1-TRg-1	-0.0267522	-0.387422	-0.0259396	0.84639
PRE7g7-NRD1-TRg-4	0.0280533	0.314058	0.0289361	0.754457
PRE7g7-RPB3-NRg-1	0.0122124	0.111303	0.012271	0.947496
PRE7g7-PHO85-NRg-6	-0.195835	-2.55158	-0.195214	0.437399
PRE7g7-SNF6-TRg-6	0.0296663	0.334705	0.0303247	0.815145
PRE7g7-PRP38-NRg-2	NA	NA	NA	NA
PRE7g7-OAR1-NRg-3	-0.0105877	-0.180525	-0.00963447	0.977168
PRE7g7-ROX3-NRg-1	-0.0385574	-0.538521	-0.0372124	0.797091
PRE7g7-YPP1-TRg-6	0.0338835	0.388682	0.03462	0.565897
PRE7g7-CBF2-NRg-8	-0.0257353	-0.374406	-0.0247961	0.843789
PRE7g7-SPT6-TRg-5	-0.0695081	-0.934673	-0.0691428	0.656672
PRE7g7-SEC10-NRg-1	0.0529454	0.632664	0.0541474	0.697405
PRE7g7-NSL1-NRg-3	0.0467229	0.55302	0.0470703	0.470625
PRE7g7-NRD1-NRg-8	-0.0431097	-0.596788	-0.0423118	0.828614
PRE7g7-RPB3-TRg-1	0.0187665	0.195193	0.0192348	0.864308
PRE7g7-NRD1-NRg-4	0.0424379	0.498173	0.0432957	0.712015
PRE7g7-RVB1-TRg-2	-0.0594803	-0.806322	-0.0593769	0.35061
PRE7g7-TIF5-NRg-8	0.0253459	0.279405	0.0262918	0.807264
PRE7g7-EOS1-NRg-1	-0.015499	-0.243387	-0.0152158	0.889735
PRE7g7-ERG25-NA-26	-0.0802333	-1.07195	-0.0793485	0.288474
PRE7g7-MSL5-NRg-4	-0.0322582	-0.457895	-0.0307873	0.886159
PRE7g7-SEC24-TRg-2	0.0199238	0.210006	0.0200277	0.931819
PRE7g7-RPL30-NRg-5	0.0313505	0.356261	0.0314148	0.604974
PRE7g7-SNU71-NRg-3	0.00411195	0.00762267	0.00526728	0.817043
PRE7g7-CDC33-NRg-1	-0.0514783	-0.703902	-0.0507139	0.451848
PRE7g7-RPN6-TRg-4	-0.0175156	-0.269198	-0.0164104	0.832318
PRE7g7-NAB2-TRg-4	0.0185535	0.192467	0.019514	0.813391
PRE7g7-NAB2-TRg-6	0.0505962	0.602595	0.0515711	0.381914
PRE7g7-YTM1-NRg-1	NA	NA	NA	NA
PRE7g7-OLE1-TRg-8	-0.0346374	-0.488347	-0.0340856	0.895268
PRE7g7-OLE1-TRg-1	-0.00491414	-0.107906	-0.00336191	0.982045
PRE7g7-UTP7-TRg-4	0.000567658	-0.0377423	0.00155404	0.979546
PRE7g7-ACT1-NRg-6	0.0768074	0.938084	0.0774175	0.567413
PRE7g7-RPL18A-NRg-3	-0.0472713	-0.650055	-0.0468252	0.261328
PRE7g7-BRX1-NRg-1	-0.0820763	-1.09554	-0.0809108	0.575433
PRE7g7-NAF1-TRg-8	0.0287845	0.323417	0.0297897	0.301023
PRE7g7-NAF1-TRg-6	-0.00986141	-0.171229	-0.00866699	0.965307
PRE7g7-NAF1-TRg-4	-0.0155589	-0.244153	-0.0143969	0.597479
PRE7g7-CDC8-TRg-2	-0.0386201	-0.539324	-0.0374206	0.906327
PRE7g7-NSE4-TRg-1	-0.0956482	-1.26925	-0.0950291	0.439022
PRE7g7-PAB1-NRg-2	-0.00745688	-0.140452	-0.00772205	0.963098
PRE7g7-PRP43-TRg-4	0.0431367	0.507117	0.0439564	0.778668
PRE7g7-SEC2-NRg-3	-0.0300584	-0.429739	-0.0296004	0.684624
PRE7g7-SEC2-NRg-6	-0.0425668	-0.589839	-0.0419804	0.672033
PRE7g7-MPP10-NRg-5	-0.00810524	-0.148751	-0.00653802	0.986457
PRE7g7-YDR355C-TRg-2	-0.00794036	-0.14664	-0.0071551	0.973025
PRE7g7-YLR339C-TRg-9	0.0744552	0.907977	0.0749984	0.669449
PRE7g7-SNM1-TRg-2	0.128369	1.59804	0.129454	0.410088
PRE7g7-ALR1-NRg-4	0.011624	0.103773	0.0123065	0.917686
PRE7g7-ALR1-NRg-1	NA	NA	NA	NA
PRE7g7-ALR1-NRg-3	0.0268239	0.298323	0.02787	0.874863
PRE7g7-RPL10-TRg-1	0.0943751	1.16294	0.095248	0.55612
PRE7g7-RPL28-TRg-2	0.0144637	0.14012	0.0154045	0.8555
PRE7g7-UTP25-TRg-1	NA	NA	NA	NA
PRE7g7-POB3-TRg-1	-0.00031052	-0.0489825	0.000493105	0.976892
PRE7g7-POB3-TRg-3	-0.044731	-0.61754	-0.0447011	0.81557
PRE7g7-POB3-TRg-2	-0.0722117	-0.969277	-0.0714055	0.297796
PRE7g7-MED11-TRg-1	0.133736	1.66674	0.13426	0.424561
PRE7g7-ISA1-TRg-15	NA	NA	NA	NA
PRE7g7-RRP1-NRg-1	-0.0355207	-0.499654	-0.0349882	0.445233
PRE7g7-MES1-NRg-1	-0.00896129	-0.159707	-0.00831178	0.960033
PRE7g7-SEC13-NRg-5	NA	NA	NA	NA
PRE7g7-MCM2-NRg-2	NA	NA	NA	NA
PRE7g7-ALA1-TRg-4	-0.00723561	-0.13762	-0.00685107	0.970804
PRE7g7-MTG2-TRg-5	-0.0287295	-0.412729	-0.0279876	0.679138
PRE7g7-TIF35-NRg-3	-0.0361264	-0.507405	-0.0351914	0.740284
PRE7g7-NSE1-TRg-3	0.00634732	0.0362341	0.00702618	0.761985
PRE7g7-NSE1-TRg-4	0.0956721	1.17954	0.096725	0.303149
PRE7g7-MOB2-NRg-6	-0.0736983	-0.988305	-0.0726699	0.412979
PRE7g7-VRG4-NRg-3	-0.0897305	-1.19351	-0.0897789	0.345006
PRE7g7-PRP9-TRg-3	NA	NA	NA	NA
PRE7g7-HYM1-TRg-5	0.0408868	0.47832	0.0414703	0.757595
PRE7g7-POP1-TRg-5	0.00424415	0.00931482	0.00523222	0.957163
PRE7g7-POP1-TRg-9	0.0132001	0.123946	0.0140803	0.910979
PRE7g7-RPL17A-TRg-1	0.0014699	-0.0261941	0.00196704	0.92273
PRE7g7-SLD2-TRg-1	0.0795174	0.97277	0.0805751	0.343008
PRE7g7-CDC48-NRg-7	0.155114	1.94037	0.15489	0.550472
PRE7g7-FHL1-NRg-2	-0.0373825	-0.523483	-0.0363614	0.737618
PRE7g7-BET3-NRg-7	0.101876	1.25895	0.102301	0.37164
PRE7g7-MAK21-TRg-1	0.0746862	0.910934	0.0754542	0.410705
PRE7g7-BRN1-TRg-4	-0.0250816	-0.366039	-0.0244958	0.823272
PRE7g7-FBA1-NRg-3	0.0215037	0.230228	0.0223323	0.777
PRE7g7-CDC42-TRg-6	NA	NA	NA	NA
PRE7g7-CDC42-TRg-7	-0.0252807	-0.368588	-0.0251452	0.881081
PRE7g7-COG4-NRg-1	-0.0836335	-1.11547	-0.0828954	0.669045
PRE7g7-ATP3-NRg-3	-0.0108129	-0.183408	-0.0098134	0.911894
PRE7g7-ATP3-NRg-2	0.00668858	0.040602	0.00757265	0.959639
PRE7g7-SMP3-TRg-5	0.00211929	-0.0178822	0.00319115	0.973337
PRE7g7-CFT2-NRg-2	-0.0170093	-0.262717	-0.0163374	0.945851
PRE7g7-FAS2-TRg-5	-0.0421166	-0.584077	-0.0407258	0.284249
PRE7g7-DBP2-NRg-3	-0.064668	-0.872722	-0.0632397	0.554362
PRE7g7-DBP2-NRg-2	0.0522248	0.62344	0.053331	0.575387
PRE7g7-MPS2-NRg-4	-0.0634064	-0.856574	-0.0626947	0.53186
PRE7g7-ARC35-TRg-2	0.0888569	1.09231	0.0894654	0.617016
PRE7g7-ARC35-TRg-5	-0.152442	-1.99618	-0.153005	0.458054
PRE7g7-MRD1-TRg-1	0.0134885	0.127637	0.01452	0.796371
PRE7g7-RLP7-TRg-1	0.0564565	0.677604	0.0570181	0.604947
PRE7g7-SPC34-TRg-1	-0.0171836	-0.264948	-0.0164259	0.865199
PRE7g7-CDC45-TRg-2	0.0891498	1.09606	0.090247	0.613182
PRE7g7-GCD6-TRg-3	-0.0286225	-0.41136	-0.027654	0.906607
PRE7g7-GCD6-TRg-4	-0.0475727	-0.653913	-0.0464787	0.658495
PRE7g7-YPT6-NRg-2	NA	NA	NA	NA
PRE7g7-RPS13-TRg-2	-0.0857292	-1.14229	-0.0848641	0.701363
PRE7g7-IPI3-TRg-3	-0.0128329	-0.209263	-0.0116815	0.947033
PRE7g7-TIF5-NRg-9	0.0778894	0.951933	0.078693	0.469478
PRE7g7-TIF5-NRg-7	-0.0444961	-0.614533	-0.0436011	0.928739
PRE7g7-TIF5-NRg-6	0.0890033	1.09418	0.0896272	0.297356
PRE7g7-NAB3-TRg-3	0.00915487	0.0721693	0.00952711	0.929336
PRE7g7-GCD2-TRg-1	-0.0309399	-0.441021	-0.0293977	0.851729
PRE7g7-UBA1-TRg-2	0.0555305	0.665751	0.0564624	0.706495
PRE7g7-SLD3-TRg-6	-0.0577027	-0.78357	-0.0572093	0.820815
PRE7g7-LCB1-TRg-5	0.0523619	0.625196	0.0536329	0.662041
PRE7g7-TOA2-TRg-6	0.0702994	0.854786	0.0703346	0.717583
PRE7g7-TOA2-TRg-1	0.159329	1.99432	0.159751	0.396373
PRE7g7-TOA2-TRg-3	NA	NA	NA	NA
PRE7g7-LSM2-TRg-1	-0.17382	-2.2698	-0.171537	0.409244
PRE7g7-YML6-TRg-13	NA	NA	NA	NA
PRE7g7-YML6-TRg-12	-0.0402751	-0.560507	-0.0391004	0.6188
PRE7g7-UTP15-NRg-1	0.0498113	0.592549	0.0505235	0.612587
PRE7g7-TIF6-NRg-8	0.0627369	0.75799	0.0631197	0.422644
PRE7g7-SUP35-NRg-1	0.0267445	0.297307	0.0272008	0.873273
PRE7g7-MPP10-NRg-1	-0.0212419	-0.316893	-0.0205049	0.732128
PRE7g7-SWI3-TRg-7	-0.121893	-1.60517	-0.121201	0.486422
PRE7g7-SSN3-NRg-2	-0.0589327	-0.799314	-0.0570456	0.286218
PRE7g7-SEC13-NRg-7	0.0730864	0.890458	0.0737748	0.48876
PRE7g7-RPS15-NRg-3	-0.0499832	-0.684765	-0.0492087	0.850429
PRE7g7-RPL3-TRg-2	0.0158955	0.158445	0.0164217	0.913386
PRE7g7-FBA1-NRg-2	0.0890395	1.09465	0.0897193	0.652905
PRE7g7-FBA1-NRg-1	-0.0258363	-0.375698	-0.0247891	0.854351
PRE7g7-FBA1-NRg-5	NA	NA	NA	NA
PRE7g7-DAM1-TRg-2	0.0312077	0.354433	0.0314729	0.865057
PRE7g7-NHP2-TRg-2	-0.0281889	-0.40581	-0.0268093	0.799065
PRE7g7-HCA4-NRg-6	-0.0134221	-0.216804	-0.0122506	0.910159
PRE7g7-PRE3-TRg-4	-0.223744	-2.90881	-0.224309	0.486475
PRE7g7-DBP5-NRg-4	0.0802464	0.982101	0.0810236	0.652536
PRE7g7-SPT6-NRg-4	-0.0927589	-1.23227	-0.0916791	0.654544
PRE7g7-SPT6-NRg-2	-0.0631664	-0.853503	-0.06171	0.438166
PRE7g7-RPL18A-TRg-4	0.0480564	0.570088	0.0491233	0.822554
PRE7g7-KSH1-TRg-1	0.0697373	0.847591	0.0705582	0.29055
PRE7g7-KSH1-TRg-3	0.0938251	1.1559	0.0948609	0.358118
PRE7g7-IPI3-NRg-1	0.0544336	0.651711	0.0555233	0.533201
PRE7g7-PGA2-TRg-8	-0.00896081	-0.159701	-0.00781822	0.940522
PRE7g7-RPL18A-TRg-2	NA	NA	NA	NA
PRE7g7-RPL33A-NRg-6	0.0166741	0.168412	0.0169156	0.930882
PRE7g7-TAF12-NRg-2	-0.00388226	-0.0946988	-0.00320885	0.972923
PRE7g7-USE1-TRg-5	-0.0577283	-0.783898	-0.056426	0.724797
PRE7g7-YNL114C-TRg-1	0.0184533	0.191184	0.020072	0.5838
PRE7g7-SMC5-TRg-7	0.00428144	0.00979203	0.00522225	0.922409
PRE7g7-SMC5-TRg-6	0.064422	0.779558	0.0653748	0.754754
PRE7g7-RSC58-TRg-1	0.102111	1.26196	0.103247	0.556565
PRE7g7-CTF13-TRg-2	0.0329663	0.376942	0.0337051	0.825869
PRE7g7-NAB2-NRg-2	0.0214647	0.229728	0.0224902	0.937082
PRE7g7-MCM7-TRg-4	-0.0280194	-0.403641	-0.0272461	0.869317
PRE7g7-BCP1-NRg-5	-0.0337845	-0.477431	-0.0340762	0.917495
PRE7g7-STU2-TRg-3	0.114537	1.421	0.11497	0.327202
PRE7g7-SEC21-NRg-6	-0.00850948	-0.153925	-0.00783394	0.972117
PRE7g7-SEC21-NRg-3	-0.0614642	-0.831715	-0.0610005	0.685267
PRE7g7-RPL1B-TRg-3	0.190926	2.39874	0.191459	0.266332
PRE7g7-SEC20-NRg-2	-0.04372	-0.6046	-0.0424159	0.786861
PRE7g7-VMA3-NRg-2	0.0372738	0.432076	0.0375099	0.773048
PRE7g7-SEC23-NRg-5	-0.0199356	-0.300173	-0.0192978	0.930321
PRE7g7-CDC28-TRg-4	-0.0797745	-1.06608	-0.0786794	0.623369
PRE7g7-RPN12-NRg-11	-0.0366663	-0.514317	-0.0357644	0.538866
PRE7g7-PUP3-TRg-3	-0.0398104	-0.554559	-0.0386799	0.518478
PRE7g7-SEC31-TRg-2	0.0687772	0.835302	0.0697611	0.594096
PRE7g7-SED5-TRg-6	0.0317173	0.360956	0.0329176	0.841025
PRE7g7-SED5-TRg-5	0.00566319	0.0274776	0.00656474	0.977883
PRE7g7-RPL33A-TRg-1	0.0528523	0.631472	0.0534023	0.145877
PRE7g7-RPL33A-TRg-2	-0.0152846	-0.240642	-0.0140521	0.939242
PRE7g7-MRPL11-TRg-2	0.0223642	0.241242	0.0235869	0.902916
PRE7g7-RTP1-NRg-2	0.0598597	0.721162	0.0608984	0.475373
PRE7g7-NUG1-TRg-2	0.0691865	0.840541	0.0704466	0.810388
PRE7g7-VPH2-TRg-4	0.0272789	0.304147	0.0284155	0.924781
PRE7g7-COP1-NRg-3	0.0216088	0.231573	0.0219837	0.791892
PRE7g7-CRM1-NRg-1	-0.00718666	-0.136993	-0.00600483	0.987087
PRE7g7-RPL5-NRg-4	NA	NA	NA	NA
PRE7g7-SNU13-NRg-4	-0.0593028	-0.804051	-0.058475	0.359457
PRE7g7-PFS2-TRg-3	0.017359	0.177177	0.0186035	0.763983
PRE7g7-MPP10-TRg-2	0.0283175	0.31744	0.0292805	0.73474
PRE7g7-TSR4-NRg-2	0.0276734	0.309196	0.0286857	0.717312
PRE7g7-RSC2-TRg-1	0.108536	1.34419	0.109466	0.322769
PRE7g7-SEC65-TRg-2	0.0449514	0.530346	0.0459619	0.430339
PRE7g7-SMI1-NRg-1	-0.0278862	-0.401936	-0.0271121	0.866528
PRE7g7-RTT105-NRg-4	-0.0219558	-0.32603	-0.0213907	0.737911
PRE7g7-VMA5-TRg-3	0.0632162	0.764124	0.0644547	0.778496
PRE7g7-VMA5-TRg-5	-0.0587842	-0.797413	-0.0578808	0.548674
PRE7g7-RRP1-TRg-3	0.111549	1.38276	0.112569	0.259543
PRE7g7-CLC1-TRg-2	-0.0470029	-0.646619	-0.0461511	0.447471
PRE7g7-GCD6-NRg-1	-0.0375776	-0.525981	-0.0364504	0.563194
PRE7g7-GCD6-NRg-2	0.0414885	0.486022	0.0425867	0.522881
PRE7g7-PXR1-TRg-1	0.068698	0.834288	0.0697393	0.351229
PRE7g7-CDC14-NRg-1	-0.0122075	-0.201258	-0.0118318	0.711839
PRE7g7-PCF11-TRg-6	-0.0955115	-1.2675	-0.0946449	0.445233
PRE7g7-PCF11-TRg-5	0.0370487	0.429195	0.0374147	0.777327
PRE7g7-PCF11-TRg-4	-0.0387494	-0.540979	-0.0383193	0.620518
PRE7g7-SEC31-NRg-1	0.100184	1.23729	0.100493	0.588479
PRE7g7-RRP5-NRg-1	0.10127	1.2512	0.102256	0.388703
PRE7g7-PRE10-TRg-5	-0.114775	-1.51406	-0.113547	0.274668
PRE7g7-PRE10-TRg-1	-0.0996739	-1.32078	-0.098966	0.728029
PRE7g7-RPS5-TRg-2	0.0242956	0.265962	0.0243512	0.939827
PRE7g7-NSP1-TRg-4	0.0806613	0.987411	0.0813511	0.523248
PRE7g7-PRP38-TRg-4	-0.0781193	-1.04489	-0.0769286	0.749654
PRE7g7-RCF1-NRg-5	-0.143514	-1.8819	-0.142339	0.294647
PRE7g7-RSC3-TRg-4	-0.048926	-0.671233	-0.0481472	0.387138
PRE7g7-RSC3-TRg-5	0.0803655	0.983626	0.0809699	0.459798
PRE7g7-RSC3-TRg-6	0.0623684	0.753273	0.0636399	0.588189
PRE7g7-HTA1-NRg-12	-0.101409	-1.34299	-0.100697	0.410829
PRE7g7-HTA1-NRg-11	0.0618695	0.746887	0.0624075	0.768817
PRE7g7-UTP23-TRg-2	-0.00681317	-0.132213	-0.00556829	0.985804
PRE7g7-GCD7-NRg-1	0.0111543	0.0977609	0.0119018	0.887076
PRE7g7-GCD7-NRg-2	0.0668733	0.810934	0.0683124	0.577659
PRE7g7-GCD7-NRg-6	-0.0942058	-1.25079	-0.0930211	0.6522
PRE7g7-GAL11-NRg-2	-0.169252	-2.21134	-0.168605	0.357268
PRE7g7-GAL11-NRg-9	-0.252684	-3.27922	-0.252574	0.302258
PRE7g7-PHO4-TRg-5	0.0878134	1.07895	0.0885696	0.555954
PRE7g7-SNP1-NRg-3	-0.0133223	-0.215527	-0.0121675	0.940892
PRE7g7-RPC37-TRg-5	-0.0641426	-0.865998	-0.0628705	0.297356
PRE7g7-CRM1-TRg-5	NA	NA	NA	NA
PRE7g7-CRM1-TRg-2	-0.0146567	-0.232606	-0.0133319	0.691731
PRE7g7-ASK1-TRg-7	0.00298684	-0.00677816	0.00302531	0.98896
PRE7g7-STU2-NRg-4	0.0695868	0.845664	0.0703913	0.481621
PRE7g7-NEO1-NRg-3	0.102804	1.27083	0.102697	0.364562
PRE7g7-GAL11-TRg-5	-0.166684	-2.17847	-0.166133	0.48313
PRE7g7-GAL11-TRg-7	0.0753306	0.919181	0.0760376	0.689468
PRE7g7-SAM50-NRg-3	-0.0390869	-0.545299	-0.0376267	0.475061
PRE7g7-CSL4-TRg-2	-0.0249628	-0.364518	-0.0237385	0.486422
PRE7g7-CCT5-TRg-2	0.0659693	0.799362	0.0670447	0.436326
PRE7g7-POL30-NRg-1	0.0614076	0.740975	0.0624545	0.284399
PRE7g7-MED4-TRg-4	-0.00363204	-0.0914961	-0.00257698	0.965591
PRE7g7-MED4-TRg-3	-0.0817898	-1.09187	-0.0807412	0.332939
PRE7g7-MED4-TRg-2	0.0327904	0.374691	0.0339431	0.876959
PRE7g7-GDI1-TRg-4	0.0536512	0.641698	0.054182	0.825198
PRE7g7-GDI1-TRg-3	-0.00592889	-0.120894	-0.00537955	0.929606
PRE7g7-REB1-TRg-6	-0.0371763	-0.520844	-0.0375395	0.66559
PRE7g7-MRPL37-NRg-2	-0.0218804	-0.325065	-0.0209009	0.563436
PRE7g7-NOC3-TRg-3	0.0377459	0.438119	0.0388754	0.45124
PRE7g7-SPC97-TRg-3	-0.093038	-1.23584	-0.0929671	0.735101
PRE7g7-IPP1-TRg-3	0.051561	0.614944	0.0525438	0.720724
PRE7g7-IPP1-TRg-2	0.0269534	0.299981	0.0281062	0.830143
PRE7g7-PTI1-TRg-3	-0.063783	-0.861394	-0.0630347	0.40842
PRE7g7-PTI1-TRg-5	-0.0856012	-1.14066	-0.0843339	0.620741
PRE7g7-RFC5-NRg-1	0.0305091	0.345492	0.0316951	0.788987
PRE7g7-CDC24-TRg-1	0.0540275	0.646513	0.0553778	0.675162
PRE7g7-CDC24-TRg-3	0.0482635	0.572739	0.0492901	0.854935
PRE7g7-CDC24-TRg-5	0.0221817	0.238905	0.0233184	0.826012
PRE7g7-CDC24-TRg-6	0.0522393	0.623626	0.0533101	0.590201
PRE7g7-UTP23-TRg-6	-0.0492544	-0.675438	-0.0477307	0.82684
PRE7g7-UTP23-TRg-4	0.081052	0.992412	0.0822815	0.368884
PRE7g7-UTP23-TRg-1	-0.00539127	-0.114013	-0.0043126	0.976066
PRE7g7-RHO3-NRg-4	0.105856	1.30988	0.107075	0.36476
PRE7g7-TRS23-NRg-1	0.0501816	0.597289	0.0501735	0.861251
PRE7g7-TRS23-NRg-3	0.134744	1.67965	0.13487	0.48313
PRE7g7-RSP5-TRg-2	-0.122801	-1.61679	-0.122578	0.400753
PRE7g7-RSP5-TRg-1	-0.0193978	-0.293289	-0.0190351	0.659768
PRE7g7-SDA1-NRg-1	0.0780313	0.95375	0.0790829	0.668378
PRE7g7-KAP95-TRg-8	NA	NA	NA	NA
PRE7g7-ACO1-TRg-6	NA	NA	NA	NA
PRE7g7-HTA1-NRg-3	NA	NA	NA	NA
PRE7g7-HTA1-NRg-2	-0.0995797	-1.31957	-0.0986996	0.214809
PRE7g7-SPN1-TRg-1	NA	NA	NA	NA
PRE7g7-MOT1-NRg-7	0.0279471	0.3127	0.028577	0.652915
PRE7g7-RPL17A-NRg-4	0.0803514	0.983445	0.0811247	0.335194
PRE7g7-ADA2-TRg-4	0.0239349	0.261345	0.0242699	0.855794
PRE7g7-SFH1-NRg-1	0.130811	1.6293	0.131368	0.294903
PRE7g7-SPC97-NRg-5	-0.127722	-1.67977	-0.12764	0.303149
PRE7g7-PRP22-TRg-3	-0.150939	-1.97695	-0.150347	0.500808
PRE7g7-SEN15-TRg-2	-0.00950057	-0.16661	-0.00921084	0.95134
PRE7g7-RPL3-NRg-2	0.110776	1.37287	0.110883	0.607823
PRE7g7-ISD11-NRg-2	0.0582905	0.701078	0.0586372	0.577103
PRE7g7-HEM12-TRg-8	-0.0896088	-1.19195	-0.088682	0.603308
PRE7g7-SEC10-TRg-1	0.0542197	0.648974	0.0551598	0.458863
PRE7g7-HTB1-TRg-7	0.0440246	0.518483	0.0450057	0.714823
PRE7g7-TTI2-TRg-1	-0.0124967	-0.204958	-0.0113834	0.830681
PRE7g7-ACP1-TRg-2	0.105761	1.30867	0.106752	0.447942
PRE7g7-ACP1-TRg-4	0.00863541	0.0655205	0.00970458	0.885682
PRE7g7-GAL11-NRg-10	-0.0607746	-0.822889	-0.0613065	0.865199
PRE7g7-UTP22-TRg-2	0.0463021	0.547633	0.0475836	0.785347
PRE7g7-MST1-NRg-5	-0.114471	-1.51018	-0.114874	0.495038
PRE7g7-RIB7-NRg-2	0.0461123	0.545204	0.0471772	0.501284
PRE7g7-MCD1-TRg-6	0.0125473	0.115591	0.0136696	0.803407
PRE7g7-MCD1-TRg-5	0.0293113	0.33016	0.0299842	0.852906
PRE7g7-GPI8-NRg-2	0.0331841	0.379731	0.034102	0.888704
PRE7g7-THS1-TRg-2	-0.0916826	-1.21849	-0.0905196	0.529248
PRE7g7-RRP7-TRg-2	-0.0550362	-0.749441	-0.0540871	0.512869
PRE7g7-RRP7-TRg-5	0.0358617	0.414002	0.037108	0.714084
PRE7g7-SMX2-NRg-7	0.0283383	0.317707	0.029387	0.811698
PRE7g7-RRP45-TRg-5	NA	NA	NA	NA
PRE7g7-RRP45-TRg-4	-0.043991	-0.608068	-0.0434844	0.452359
PRE7g7-CNS1-TRg-2	0.0726399	0.884742	0.073829	0.645975
PRE7g7-FBP1-NRg-9	-0.0837811	-1.11736	-0.0828846	0.585278
PRE7g7-GCD11-NRg-1	-0.0572175	-0.77736	-0.0566997	0.286244
PRE7g7-RPL10-TRg-2	-0.0148425	-0.234984	-0.0137461	0.87348
PRE7g7-NUP192-TRg-4	-0.0298753	-0.427396	-0.0295818	0.892876
PRE7g7-NUP145-NRg-4	0.0568646	0.682828	0.0570592	0.77938
PRE7g7-HEM12-TRg-6	0.0104459	0.088694	0.0111896	0.922284
PRE7g7-PLC1-TRg-3	-0.029797	-0.426393	-0.0295919	0.865255
PRE7g7-RPA43-TRg-1	0.0211184	0.225295	0.0220733	0.699822
PRE7g7-RPB7-NRg-2	0.0379528	0.440767	0.0386921	0.50099
PRE7g7-RPB7-NRg-3	-0.0188557	-0.286351	-0.0183974	0.957379
PRE7g7-NSL1-NRg-1	0.0132329	0.124366	0.0142053	0.936721
PRE7g7-UTP6-TRg-3	0.0115582	0.102931	0.0124943	0.794516
PRE7g7-UTP6-TRg-1	0.0801111	0.980369	0.0810427	0.342404
PRE7g7-YJU2-TRg-5	-0.0405953	-0.564605	-0.0392416	0.343071
PRE7g7-FRS2-NRg-5	-0.138236	-1.81436	-0.137417	0.565091
PRE7g7-TIF35-NRg-2	0.000766984	-0.035191	0.0017399	0.98856
PRE7g7-GPI15-TRg-1	0.0318642	0.362836	0.0328978	0.708759
PRE7g7-NOP1-NRg-5	-0.0910771	-1.21074	-0.0899922	0.718171
PRE7g7-GPI15-TRg-4	0.0925465	1.13954	0.0937055	0.293378
PRE7g7-COG4-TRg-1	0.0285977	0.321026	0.0286508	0.736467
PRE7g7-TFA1-TRg-1	0.0210299	0.224164	0.0222096	0.894655
PRE7g7-RHO1-NRg-2	-0.050439	-0.690599	-0.0511462	0.830424
PRE7g7-RHO1-NRg-1	0.0108766	0.0942059	0.0114635	0.95388
PRE7g7-CDC55-NRg-2	-0.05439	-0.74117	-0.0530273	0.305786
PRE7g7-IDI1-NRg-7	-0.0063758	-0.126615	-0.00543805	0.920321
PRE7g7-RPL32-TRg-5	NA	NA	NA	NA
PRE7g7-RPB5-TRg-4	0.0278519	0.31148	0.028616	0.871534
PRE7g7-DIP2-TRg-5	NA	NA	NA	NA
PRE7g7-DIP2-TRg-1	-0.106922	-1.41355	-0.105832	0.399562
PRE7g7-RPC40-TRg-2	0.0878643	1.07961	0.0892091	0.433744
PRE7g7-CDC6-TRg-5	-0.0283016	-0.407252	-0.0273326	0.854667
PRE7g7-CDC6-TRg-3	-0.0586114	-0.795202	-0.058159	0.591022
PRE7g7-DAD2-TRg-2	-0.00948619	-0.166426	-0.00870644	0.979955
PRE7g7-RVS161-TRg-2	-0.163282	-2.13493	-0.161946	0.540161
PRE7g7-RVS161-TRg-1	-0.239755	-3.11374	-0.238648	0.329555
PRE7g7-SUP45-NRg-3	0.0356382	0.411142	0.0360902	0.782014
PRE7g7-SRB6-NRg-5	-0.064947	-0.876293	-0.0643217	0.552874
PRE7g7-RPC11-TRg-4	0.144655	1.80649	0.145349	0.378286
PRE7g7-RKI1-TRg-8	0.0211372	0.225536	0.0219337	0.883979
PRE7g7-NIP7-TRg-3	0.0397711	0.46404	0.0407475	0.287566
PRE7g7-RPL33A-NRg-12	0.106682	1.32046	0.107165	0.591405
PRE7g7-SAM50-TRg-4	NA	NA	NA	NA
PRE7g7-NOP4-NRg-1	0.0516732	0.616381	0.0523683	0.659131
PRE7g7-NOP4-NRg-3	0.128611	1.60114	0.128837	0.264889
PRE7g7-SMX2-TRg-5	0.060251	0.726172	0.0612077	0.594172
PRE7g7-POL12-NRg-2	0.0198628	0.209225	0.0205063	0.803121
PRE7g7-BMS1-NRg-2	0.0394391	0.459791	0.0400924	0.616382
PRE7g7-RPA190-TRg-5	0.0174961	0.178933	0.018131	0.845591
PRE7g7-ALG14-NRg-4	0.0185319	0.19219	0.019506	0.851576
PRE7g7-ALG14-NRg-1	0.0783	0.957188	0.0795309	0.383447
PRE7g7-PRE5-NRg-1	0.0750668	0.915806	0.0761755	0.495496
PRE7g7-BIG1-NRg-2	-0.0236887	-0.34821	-0.0231437	0.866899
PRE7g7-TFA2-TRg-4	-0.18547	-2.41892	-0.184794	0.574133
PRE7g7-IMP4-TRg-6	-0.0935356	-1.24221	-0.0927416	0.294903
PRE7g7-PAN1-NRg-1	0.0944358	1.16372	0.0945431	0.585727
PRE7g7-UTP13-TRg-2	0.0448785	0.529411	0.0456928	0.722174
PRE7g7-KAE1-NRg-3	-0.142181	-1.86485	-0.140861	0.340653
PRE7g7-ERG20-TRg-1	0.0878028	1.07882	0.0888194	0.470625
PRE7g7-CDC20-TRg-6	-0.0724528	-0.972364	-0.0721538	0.74948
PRE7g7-PWP2-NRg-2	0.0857875	1.05302	0.0871075	0.305748
PRE7g7-COG1-NRg-1	NA	NA	NA	NA
PRE7g7-RPL1B-TRg-4	-0.0763361	-1.02207	-0.075651	0.4514
PRE7g7-RPL1B-TRg-7	0.0450862	0.53207	0.0458203	0.734646
PRE7g7-UTP20-TRg-3	0.0896009	1.10183	0.0906554	0.29265
PRE7g7-UTP20-TRg-4	-0.0441713	-0.610376	-0.0428229	0.646584
PRE7g7-RPL25-TRg-4	NA	NA	NA	NA
PRE7g7-RPL25-TRg-2	0.00413826	0.00795942	0.00483875	0.973072
PRE7g7-MCM7-NRg-1	0.0609177	0.734705	0.0620301	0.607111
PRE7g7-MRP49-TRg-5	-0.0245052	-0.358661	-0.0238133	0.865553
PRE7g7-ERO1-NRg-3	-0.0334884	-0.473641	-0.0334844	0.93015
PRE7g7-UTP5-TRg-7	-0.00971843	-0.169398	-0.00925424	0.908962
PRE7g7-MCM4-NRg-1	0.040266	0.470375	0.0407847	0.281188
PRE7g7-PRE3-NRg-1	0.0222225	0.239427	0.0230388	0.606746
PRE7g7-FCF1-NRg-1	-0.0858095	-1.14332	-0.0849873	0.66018
PRE7g7-CUS1-NRg-1	0.0123354	0.112879	0.0136248	0.928228
PRE7g7-PSF1-TRg-2	0.0281931	0.315848	0.0292181	0.779471
PRE7g7-BCP1-TRg-2	0.0227116	0.245687	0.0235444	0.476333
PRE7g7-PAN1-TRg-1	0.0967846	1.19378	0.0971334	0.515687
PRE7g7-PAN1-TRg-3	0.088889	1.09272	0.0893131	0.495449
PRE7g7-PAN1-TRg-4	0.206515	2.59827	0.205972	0.511174
PRE7g7-VPS3-TRg-2	0.0561349	0.673488	0.0563298	0.525842
PRE7g7-YIL060W-NRg-1	0.0479903	0.569241	0.0485308	0.54548
PRE7g7-VPS53-NRg-1	-0.0710765	-0.954747	-0.0704772	0.498778
PRE7g7-CYR1-TRg-4	NA	NA	NA	NA
PRE7g7-CYR1-TRg-7	0.0749925	0.914854	0.0752942	0.653756
PRE7g7-MPS1-NRg-1	NA	NA	NA	NA
PRE7g7-SRP1-TRg-5	-0.00900158	-0.160223	-0.00966872	0.853734
PRE7g7-SRP1-TRg-4	0.0655348	0.793801	0.0654718	0.723023
PRE7g7-TAF12-TRg-2	NA	NA	NA	NA
PRE7g7-TAF12-TRg-3	-0.0619633	-0.838104	-0.0626572	0.820327
PRE7g7-POP4-TRg-1	-0.0414412	-0.575433	-0.0399663	0.658428
PRE7g7-SPT16-TRg-1	0.0701756	0.853201	0.0709839	0.598033
PRE7g7-NUP82-TRg-4	0.074547	0.909153	0.0753482	0.649283
PRE7g7-DML1-TRg-3	-0.00697038	-0.134225	-0.0057363	0.959779
PRE7g7-RPA43-NRg-3	0.0259799	0.28752	0.0267771	0.881408
PRE7g7-STU2-NRg-3	0.0309427	0.351041	0.0317952	0.538164
PRE7g7-POP4-NRg-4	-0.103494	-1.36968	-0.102717	0.793912
PRE7g7-MCD1-TRg-2	NA	NA	NA	NA
PRE7g7-RPS3-NRg-4	-0.0326094	-0.462391	-0.0314011	0.563577
PRE7g7-PRP9-TRg-4	0.0922126	1.13526	0.0935525	0.783104
PRE7g7-RPP1-NRg-2	-0.0386817	-0.540112	-0.03738	0.919519
PRE7g7-MTR2-NRg-11	-0.121643	-1.60198	-0.12081	0.521939
PRE7g7-GCD11-TRg-1	-0.139395	-1.82918	-0.138273	0.395876
PRE7g7-RPF1-TRg-3	-0.0555998	-0.756655	-0.0548503	0.550289
PRE7g7-SUB2-NRg-4	-0.0935499	-1.24239	-0.0928409	0.418152
PRE7g7-GPI15-TRg-3	0.0518748	0.61896	0.0527933	0.61192
PRE7g7-ERG9-TRg-6	0.0514806	0.613915	0.0522016	0.735423
PRE7g7-RPT2-NRg-1	-0.019432	-0.293727	-0.0185911	0.629653
PRE7g7-YOS1-NRg-3	0.0176951	0.18148	0.0187238	0.886865
PRE7g7-SCM3-TRg-4	-0.0827904	-1.10468	-0.0824224	0.740515
PRE7g7-SCM3-TRg-6	-0.0371631	-0.520675	-0.0363396	0.774566
PRE7g7-RLP7-NRg-1	-0.0292146	-0.418938	-0.0280354	0.901754
PRE7g7-TFB2-NRg-4	-0.0216877	-0.322598	-0.0204279	0.365983
PRE7g7-IMP4-TRg-1	0.0387711	0.45124	0.0397687	0.832206
PRE7g7-IMP4-TRg-3	0.0832747	1.02086	0.0844874	0.496392
PRE7g7-PRE4-TRg-3	-0.00272537	-0.0798912	-0.00166018	0.99782
PRE7g7-SUB2-TRg-3	-0.017652	-0.270944	-0.0168538	0.938908
PRE7g7-RPP0-NRg-4	-0.0896307	-1.19223	-0.0891871	0.707956
PRE7g7-RPP0-NRg-3	0.0340801	0.391198	0.0351005	0.442461
PRE7g7-TOM40-TRg-4	0.0747342	0.911548	0.0757248	0.556088
PRE7g7-FUR1-NRg-12	-0.0500488	-0.685605	-0.0488578	0.729629
PRE7g7-TOM40-TRg-2	0.0376057	0.436325	0.0385141	0.614431
PRE7g7-VMA11-NRg-4	0.0194983	0.20456	0.020486	0.840183
PRE7g7-PGS1-NRg-4	0.0179169	0.184318	0.0194005	0.895086
PRE7g7-URB1-TRg-4	0.0184505	0.191148	0.0191994	0.713113
PRE7g7-ARP4-TRg-3	0.0276481	0.308872	0.0284101	0.783294
PRE7g7-RPT3-TRg-3	-0.0614363	-0.831358	-0.0602537	0.538693
PRE7g7-SUI3-TRg-3	0.00856232	0.0645849	0.00928752	0.934586
PRE7g7-RFC5-NRg-2	NA	NA	NA	NA
PRE7g7-RRP14-TRg-2	-0.00702561	-0.134932	-0.00667795	0.944011
PRE7g7-SCC2-TRg-1	-0.171877	-2.24494	-0.172234	0.544434
PRE7g7-SSC1-TRg-3	0.0261648	0.289886	0.02666	0.860813
PRE7g7-RRP9-TRg-3	0.00638236	0.0366827	0.00727405	0.735533
PRE7g7-MOT1-NRg-9	-0.0407827	-0.567004	-0.0410679	0.653206
PRE7g7-RPL42A-NRg-2	0.0649464	0.78627	0.0655737	0.665547
PRE7g7-SEC16-TRg-7	-0.0620971	-0.839816	-0.0613969	0.820043
PRE7g7-IMP4-NRg-2	-0.0418409	-0.580548	-0.0410957	0.445404
PRE7g7-YEF3-NRg-4	-0.080479	-1.07509	-0.0800393	0.775826
PRE7g7-PUP1-TRg-1	-0.131467	-1.72771	-0.130524	0.346909
PRE7g7-UTP22-TRg-6	-0.0281691	-0.405556	-0.0270484	0.619445
PRE7g7-DBP2-NRg-4	-0.0380002	-0.531389	-0.0372567	0.737749
PRE7g7-PRE2-TRg-7	-0.0312863	-0.445456	-0.0308959	0.864025
PRE7g7-ATP16-TRg-6	-0.0829354	-1.10653	-0.081943	0.609285
PRE7g7-UTP13-TRg-4	-0.0323732	-0.459367	-0.031276	0.538306
PRE7g7-DOP1-NRg-4	0.00600271	0.0318234	0.00690316	0.967856
PRE7g7-TIM44-TRg-3	0.0623594	0.753157	0.0630409	0.576895
PRE7g7-ATP16-TRg-2	-0.0810359	-1.08222	-0.0798595	0.505523
PRE7g7-ENP1-NRg-3	0.0250136	0.275153	0.025814	0.83129
PRE7g7-NAF1-TRg-3	0.0836345	1.02547	0.0848322	0.249483
PRE7g7-COG4-TRg-2	0.00631349	0.0358011	0.00666056	0.811878
PRE7g7-SOG2-TRg-7	0.067953	0.824752	0.0686623	0.264642
PRE7g7-YDR341C-TRg-3	-0.0991521	-1.3141	-0.0983132	0.240243
PRE7g7-YMR290W-A-TRg-10	-0.11468	-1.51284	-0.113464	0.300206
PRE7g7-NUP192-NRg-9	0.0397378	0.463613	0.0407167	0.772313
PRE7g7-RPS31-NRg-8	-0.125593	-1.65253	-0.124716	0.237543
PRE7g7-SPC97-NRg-6	-0.241032	-3.13008	-0.240954	0.412998
PRE7g7-EBP2-NRg-1	0.0698454	0.848974	0.0707857	0.678415
PRE7g7-CDC48-TRg-5	0.043317	0.509426	0.0437159	0.498887
PRE7g7-RPT1-TRg-4	-0.109814	-1.45056	-0.108623	0.595491
PRE7g7-ULP1-NRg-2	-0.0969637	-1.28609	-0.0957564	0.483789
PRE7g7-RPN3-TRg-6	0.187885	2.35981	0.188358	0.186171
PRE7g7-RPT1-TRg-5	-0.0620968	-0.839812	-0.0611151	0.386589
PRE7g7-KRE5-TRg-2	-0.122539	-1.61344	-0.121208	0.627451
PRE7g7-TBF1-NRg-8	0.0600432	0.723511	0.060607	0.768854
PRE7g7-UTP22-NRg-4	-0.0596914	-0.809024	-0.0585485	0.503765
PRE7g7-SSC1-NRg-4	-0.00910751	-0.161579	-0.00802713	0.942383
PRE7g7-REB1-TRg-4	-0.151676	-1.98638	-0.151643	0.294635
PRE7g7-CDC48-NRg-9	-0.0286538	-0.411761	-0.0292759	0.648506
PRE7g7-FAS2-TRg-8	-0.00943632	-0.165788	-0.00857866	0.958962
PRE7g7-TAO3-TRg-8	0.1472	1.83907	0.14779	0.54291
PRE7g7-CKS1-TRg-5	-0.234496	-3.04643	-0.234059	0.473334
PRE7g7-YLR379W-TRg-7	0.0640372	0.774633	0.0649506	0.317298
PRE7g7-TEN1-NRg-2	0.040943	0.479039	0.0417304	0.645145
PRE7g7-RPL42A-TRg-2	-0.000701358	-0.053985	0.000239891	0.98365
PRE7g7-SEC27-TRg-4	-0.0643942	-0.869218	-0.0648881	0.527902
PRE7g7-TBF1-NRg-4	0.128918	1.60507	0.129432	0.394686
PRE7g7-RPT1-NRg-6	-0.0514565	-0.703623	-0.0511075	0.677686
PRE7g7-COG1-TRg-3	NA	NA	NA	NA
PRE7g7-SUI1-TRg-6	-0.126499	-1.66413	-0.125	0.398227
PRE7g7-TIM23-TRg-6	0.0877137	1.07768	0.0887318	0.513956
PRE7g7-CDC48-NRg-6	-0.0343391	-0.484529	-0.0341176	0.90262
PRE7g7-EPL1-TRg-5	NA	NA	NA	NA
PRE7g7-RPT5-TRg-8	-0.121558	-1.60088	-0.120657	0.424227
PRE7g7-ATP16-NRg-4	-0.00249712	-0.0769698	-0.00138397	0.997953
PRE7g7-RPN6-TRg-3	NA	NA	NA	NA
PRE7g7-ERG9-NRg-6	-0.0286342	-0.41151	-0.028196	0.198777
PRE7g7-SMX3-TRg-1	0.0551895	0.661387	0.0557764	0.297306
PRE7g7-NCB2-NRg-3	0.0462253	0.54665	0.0470414	0.76199
PRE7g7-SEC16-NRg-12	0.105111	1.30036	0.105122	0.531642
PRE7g7-RPN6-TRg-2	-0.00935885	-0.164796	-0.00809116	0.955281
PRE7g7-REB1-NRg-4	0.0953801	1.1758	0.0959088	0.431819
PRE7g7-ATP16-TRg-9	0.0660415	0.800287	0.0674357	0.291605
PRE7g7-ERG9-NRg-7	0.0663144	0.803779	0.0669502	0.765502
PRE4g9-RPL15A-NRg-4	0.0333913	0.382381	0.0299318	0.820686
PRE4g9-RPL15A-NRg-5	-0.0151167	-0.238494	-0.0160666	0.886722
PRE4g9-KRE33-TRg-1	-0.000296977	-0.0488091	0.00144079	0.986556
PRE4g9-PMI40-NRg-1	-0.0156799	-0.245702	-0.0141872	0.911687
PRE4g9-NOP19-NRg-3	-0.0104065	-0.178206	-0.00938923	0.936535
PRE4g9-SRP14-NRg-4	0.0183209	0.18949	0.0197033	0.824868
PRE4g9-SEC27-TRg-2	-0.0129776	-0.211113	-0.0166978	0.703941
PRE4g9-GPI14-TRg-3	0.0485497	0.576402	0.0486414	0.296788
PRE4g9-PAH1-TRg-7	-0.0679726	-0.91502	-0.0748803	0.242725
PRE4g9-PAH1-TRg-6	0.000667801	-0.0364605	-0.00453315	0.975595
PRE4g9-PAH1-TRg-5	0.0220292	0.236954	0.0179496	0.60345
PRE4g9-PAH1-TRg-3	-0.0352036	-0.495594	-0.0371149	0.794516
PRE4g9-COG3-TRg-1	-0.0280164	-0.403603	-0.0289347	0.800086
PRE4g9-HTS1-NRg-5	-0.0510045	-0.697837	-0.0498982	0.457467
PRE4g9-MSN5-TRg-7	NA	NA	NA	NA
PRE4g9-ERG26-TRg-1	-0.136483	-1.79191	-0.136995	0.377043
PRE4g9-SMD2-TRg-5	0.0219186	0.235538	0.0239106	0.566572
PRE4g9-SMD2-TRg-4	-0.0207252	-0.310279	-0.0187661	0.769383
PRE4g9-SMD2-TRg-1	-0.0145858	-0.231699	-0.0125008	0.895086
PRE4g9-PRE7-TRg-4	0.0467131	0.552894	0.0458643	0.799613
PRE4g9-PRE7-TRg-7	-0.00697281	-0.134256	-0.00428111	0.966877
PRE4g9-SEC6-TRg-3	0.00410766	0.00756773	0.00421828	0.914397
PRE4g9-ESF2-NRg-1	-0.0483927	-0.664408	-0.0464927	0.57849
PRE4g9-ESF2-NRg-3	-0.017042	-0.263137	-0.0158437	0.756233
PRE4g9-AFG2-TRg-2	-0.0319348	-0.453755	-0.0300259	0.792727
PRE4g9-RRP36-TRg-3	-0.0182638	-0.278774	-0.0182822	0.866748
PRE4g9-RRP36-TRg-5	-0.00771233	-0.143721	-0.00577387	0.923394
PRE4g9-GCR1-NRg-2	0.0196252	0.206184	0.0197529	0.795794
PRE4g9-PRE4-NRg-4	0.150339	1.87925	0.147931	0.337322
PRE4g9-PRE4-NRg-9	0.0216354	0.231913	0.0200053	0.788446
PRE4g9-DSN1-NRg-2	-0.0237865	-0.349462	-0.0220739	0.903047
PRE4g9-GPI11-TRg-3	-0.0375688	-0.525868	-0.0398109	0.686708
PRE4g9-POP3-TRg-1	-0.00930186	-0.164067	-0.00683062	0.860415
PRE4g9-MNE1-TRg-5	0.0225148	0.243169	0.0188998	0.859392
PRE4g9-RRP12-NRg-1	-0.0364417	-0.511441	-0.0359356	0.737229
PRE4g9-RSC6-TRg-2	0.0297082	0.33524	0.0294632	0.721889
PRE4g9-CDC25-TRg-1	0.0463653	0.548442	0.0440076	0.699293
PRE4g9-CDC25-TRg-9	0.0537465	0.642917	0.0479894	0.710485
PRE4g9-YPP1-NRg-3	-0.0698823	-0.939463	-0.0710857	0.598096
PRE4g9-NFS1-NRg-9	-0.198907	-2.5909	-0.200871	0.404269
PRE4g9-NFS1-NRg-8	0.0155122	0.15354	0.0134337	0.893063
PRE4g9-UBA2-TRg-1	-0.0226455	-0.334858	-0.0233024	0.880179
PRE4g9-ARP2-NRg-3	-0.0760082	-1.01787	-0.0827458	0.619445
PRE4g9-MAK16-TRg-1	-0.0055616	-0.116193	-0.00670916	0.948969
PRE4g9-CEP3-NRg-1	0.0226361	0.244721	0.0230506	0.347862
PRE4g9-GUK1-TRg-5	-0.0385885	-0.538919	-0.0381288	0.602245
PRE4g9-GUK1-TRg-2	-0.0385185	-0.538023	-0.0369802	0.717443
PRE4g9-GPI12-NRg-6	-0.0341986	-0.482731	-0.0339396	0.193074
PRE4g9-RPS5-NRg-5	0.0168661	0.170869	0.0162015	0.83129
PRE4g9-RPS5-NRg-2	-0.00155796	-0.064949	-8.44104e-05	0.992547
PRE4g9-RPC19-NRg-1	0.0774955	0.946892	0.0780335	0.694136
PRE4g9-TIM54-TRg-1	0.0437755	0.515294	0.0455623	0.691494
PRE4g9-TEN1-TRg-2	0.0239134	0.26107	0.024457	0.758817
PRE4g9-SAH1-NRg-4	-0.00931931	-0.16429	-0.00880763	0.91746
PRE4g9-SAH1-NRg-5	-0.0396302	-0.552252	-0.0398399	0.521513
PRE4g9-SAH1-NRg-3	-0.0265571	-0.384924	-0.0250487	0.703931
PRE4g9-ATP15-NRg-5	-0.0267395	-0.387259	-0.0346965	0.928739
PRE4g9-SCD5-TRg-5	0.0619742	0.748227	0.0595314	0.366128
PRE4g9-ARB1-NRg-2	-0.0247984	-0.362414	-0.0230133	0.264889
PRE4g9-ARB1-NRg-4	-0.0944046	-1.25333	-0.0937372	0.500285
PRE4g9-PUP2-TRg-1	0.0997936	1.2323	0.101428	0.409905
PRE4g9-CCT8-TRg-2	NA	NA	NA	NA
PRE4g9-MCM4-TRg-1	0.0118456	0.10661	0.0113422	0.910823
PRE4g9-LSM4-TRg-1	-0.0230023	-0.339424	-0.0165181	0.911013
PRE4g9-NOP53-NRg-1	0.0496894	0.590988	0.0498286	0.845043
PRE4g9-ATP3-TRg-4	-0.0696115	-0.935996	-0.0679714	0.633302
PRE4g9-AFG2-NRg-3	0.0770733	0.941487	0.078405	0.598159
PRE4g9-PRO3-NRg-3	-0.0180757	-0.276366	-0.016375	0.881311
PRE4g9-NRD1-NRg-10	-0.0591553	-0.802163	-0.0606614	0.478861
PRE4g9-SEC61-TRg-2	-0.0213011	-0.31765	-0.0201882	0.882247
PRE4g9-RHO3-TRg-4	-0.0116086	-0.193592	-0.00981363	0.866028
PRE4g9-SNF2-TRg-6	0.105407	1.30415	0.10866	0.459373
PRE4g9-SMD2-NRg-3	0.0401218	0.468528	0.040978	0.713487
PRE4g9-RSC4-TRg-2	-0.00461302	-0.104052	-0.00605189	0.974741
PRE4g9-RSC4-TRg-1	0.0609455	0.73506	0.0568759	0.703099
PRE4g9-TIF34-TRg-2	-0.0615532	-0.832855	-0.0614354	0.507781
PRE4g9-BET1-NRg-1	0.0438719	0.516528	0.040511	0.807798
PRE4g9-CDC8-NRg-2	-0.0199898	-0.300867	-0.0182963	0.744262
PRE4g9-PRP42-TRg-2	0.0336868	0.386164	0.035355	0.583219
PRE4g9-RRB1-TRg-2	0.0119147	0.107494	0.0137543	0.774135
PRE4g9-SPC24-TRg-1	0.0294	0.331295	0.0282565	0.66113
PRE4g9-ILS1-NRg-1	-0.088787	-1.18143	-0.0865196	0.330202
PRE4g9-GFA1-TRg-2	-0.0101188	-0.174522	-0.00895239	0.899865
PRE4g9-SEC21-NRg-10	0.00879022	0.0675019	0.00789977	0.90002
PRE4g9-RPC10-NRg-1	-0.0588563	-0.798336	-0.0587268	0.720164
PRE4g9-RPB10-TRg-3	-0.113332	-1.4956	-0.113176	0.413529
PRE4g9-RPB10-TRg-2	-0.0104698	-0.179015	-0.00942576	0.946677
PRE4g9-YNL181W-TRg-1	0.114633	1.42223	0.116352	0.572328
PRE4g9-RAD3-NRg-1	-0.0116694	-0.19437	-0.00925931	0.940809
PRE4g9-NOP10-TRg-1	-0.0725079	-0.973068	-0.0705979	0.514364
PRE4g9-BFR2-TRg-3	-0.021182	-0.316126	-0.0224849	0.446193
PRE4g9-MCM2-TRg-6	-0.0716501	-0.962089	-0.0693165	0.327281
PRE4g9-MCM2-TRg-4	0.0042444	0.00931798	0.00556683	0.931993
PRE4g9-MPP10-TRg-1	0.0262143	0.290521	0.0262628	0.722249
PRE4g9-RET2-TRg-4	-0.00114038	-0.0596042	-0.00212372	0.990813
PRE4g9-RET2-TRg-1	0.0161489	0.161688	0.0162905	0.840572
PRE4g9-RPS2-NRg-1	-0.0557718	-0.758857	-0.0565424	0.381929
PRE4g9-RPS2-NRg-2	-0.0504882	-0.691229	-0.0512354	0.770652
PRE4g9-ORC4-NRg-3	-0.0346372	-0.488344	-0.0335486	0.775024
PRE4g9-TIP20-TRg-7	-0.0524764	-0.716677	-0.0513343	0.646607
PRE4g9-SMT3-TRg-1	-0.073626	-0.98738	-0.0740598	0.511592
PRE4g9-MSS18-NRg-6	0.00165732	-0.0237952	0.00290677	0.975595
PRE4g9-YEF3-NRg-9	-0.0331713	-0.469583	-0.0422216	0.867276
PRE4g9-ASK1-NRg-1	-0.00452576	-0.102935	-0.00286427	0.992176
PRE4g9-SMC1-TRg-1	0.00571329	0.028119	0.00465304	0.949603
PRE4g9-NIP1-NRg-1	0.00570865	0.0280595	0.00782223	0.792136
PRE4g9-RPP1-NRg-1	-0.0864219	-1.15116	-0.0840903	0.688933
PRE4g9-YDJ1-TRg-6	-0.131972	-1.73418	-0.135402	0.378657
PRE4g9-SUB2-NRg-1	-0.0072708	-0.13807	-0.00560091	0.931268
PRE4g9-TIM10-NRg-8	0.0427782	0.502529	0.0397309	0.779445
PRE4g9-TIM10-NRg-4	-0.0696969	-0.937089	-0.0694031	0.527847
PRE4g9-TIM10-NRg-7	-0.0199038	-0.299766	-0.0218224	0.826658
PRE4g9-SKI6-TRg-4	-0.017154	-0.26457	-0.0152075	0.90513
PRE4g9-TUB4-TRg-1	-0.0440918	-0.609359	-0.0427218	0.716879
PRE4g9-CDC37-NRg-2	0.00447113	0.01222	0.00476754	0.980002
PRE4g9-ISD11-TRg-3	-0.0251875	-0.367393	-0.0254984	0.905385
PRE4g9-YOS1-TRg-4	0.0136813	0.130105	0.0159794	0.919752
PRE4g9-SSC1-TRg-6	0.0141273	0.135814	0.0129992	0.893126
PRE4g9-MTR3-TRg-5	0.0345427	0.397119	0.0356112	0.737473
PRE4g9-MTR3-TRg-6	-0.0870113	-1.1587	-0.0847627	0.676397
PRE4g9-TFA1-TRg-2	0.0105536	0.0900724	0.0116362	0.930598
PRE4g9-CDC3-NRg-3	-0.192311	-2.50648	-0.196657	0.337042
PRE4g9-ERG25-TA-18	-0.0424101	-0.587834	-0.0413086	0.772614
PRE4g9-RPB11-TRg-4	0.0327748	0.374491	0.0331686	0.60268
PRE4g9-RPB11-TRg-1	0.0235206	0.256042	0.0202083	0.463459
PRE4g9-RPB11-TRg-2	0.0824528	1.01034	0.0816024	0.679138
PRE4g9-DED1-TRg-3	-0.00813874	-0.149179	-0.0063087	0.93015
PRE4g9-DED1-TRg-1	-0.0566066	-0.769541	-0.053512	0.539248
PRE4g9-DED1-TRg-6	-0.0774206	-1.03595	-0.0751187	0.476333
PRE4g9-DED1-TRg-4	0.0394962	0.460521	0.0415257	0.793259
PRE4g9-RPL10-NRg-5	-0.0850171	-1.13318	-0.0855524	0.692899
PRE4g9-RPL10-NRg-4	-0.034435	-0.485757	-0.0344805	0.536401
PRE4g9-EFB1-NRg-1	-0.0214458	-0.319502	-0.0212756	0.691672
PRE4g9-EFB1-NRg-5	-0.111937	-1.47773	-0.11097	0.258471
PRE4g9-EFB1-NRg-4	-0.120492	-1.58723	-0.119265	0.592934
PRE4g9-RPT3-NRg-1	-0.0933158	-1.2394	-0.0899366	0.539654
PRE4g9-SAC6-TRg-8	-0.0120476	-0.199211	-0.0199517	0.7625
PRE4g9-SAC6-TRg-4	-0.00870531	-0.156431	-0.0115203	0.814518
PRE4g9-SAC6-TRg-5	-0.00540238	-0.114155	-0.0129057	0.954054
PRE4g9-SAC6-TRg-3	0.0203486	0.215443	0.0183503	0.55757
PRE4g9-DIM1-TRg-5	0.0356687	0.411531	0.0358599	0.635532
PRE4g9-DIM1-TRg-7	-0.0990026	-1.31219	-0.0992366	0.597071
PRE4g9-RPC17-NRg-1	-0.0461578	-0.635802	-0.0443395	0.814845
PRE4g9-RPC17-NRg-2	0.0162708	0.16325	0.0178467	0.777306
PRE4g9-YDR341C-TRg-1	-0.0279914	-0.403282	-0.0269404	0.509459
PRE4g9-RAP1-NRg-8	0.0104458	0.0886927	0.0131943	0.619732
PRE4g9-RAP1-NRg-5	-0.000330673	-0.0492404	0.00101772	0.980992
PRE4g9-RAP1-NRg-2	-0.0403376	-0.561307	-0.0378296	0.658829
PRE4g9-SEC26-NRg-3	-0.0222165	-0.329367	-0.0206276	0.836528
PRE4g9-SPP41-TRg-3	-0.0374438	-0.524267	-0.0402159	0.879628
PRE4g9-TAP42-NRg-1	0.0173303	0.17681	0.0191119	0.830278
PRE4g9-PGA2-TRg-6	0.0714301	0.869257	0.0745518	0.637644
PRE4g9-BRL1-TRg-1	0.00760612	0.0523462	0.00514034	0.935651
PRE4g9-FOL2-TRg-1	-0.087789	-1.16866	-0.0857862	0.403346
PRE4g9-NAB3-NRg-5	0.00768152	0.0533112	0.00881618	0.948389
PRE4g9-SNF4-TRg-4	0.000211298	-0.0423035	-0.00340551	0.967032
PRE4g9-HRR25-TRg-2	0.0560086	0.671871	0.0528408	0.656664
PRE4g9-TRS23-TRg-4	-0.0331459	-0.469257	-0.038536	0.816336
PRE4g9-CTR86-TRg-4	-0.0269244	-0.389625	-0.0258556	0.706736
PRE4g9-RPB5-TRg-5	-0.0308866	-0.44034	-0.0363728	0.556088
PRE4g9-SPN1-NRg-2	-0.0436392	-0.603565	-0.051364	0.756361
PRE4g9-SPN1-NRg-1	0.0760798	0.928771	0.0682009	0.774267
PRE4g9-SEC61-NRg-1	-0.0359836	-0.505578	-0.0343707	0.799887
PRE4g9-SEC61-NRg-7	0.0477277	0.56588	0.0491126	0.442689
PRE4g9-TUS1-TRg-3	-0.013601	-0.219093	-0.0162107	0.670535
PRE4g9-OLE1-NRg-2	-0.114305	-1.50805	-0.113724	0.620741
PRE4g9-AFG2-TRg-1	0.077286	0.944209	0.0755032	0.325652
PRE4g9-TOA2-NRg-1	0.0219456	0.235884	0.019486	0.666457
PRE4g9-USO1-TRg-1	0.0561562	0.67376	0.053076	0.686961
PRE4g9-UTP22-NRg-2	0.00579331	0.0291432	0.00875037	0.894927
PRE4g9-RIB1-TRg-3	-0.0352729	-0.496481	-0.0329522	0.553432
PRE4g9-RIB1-TRg-7	0.0961311	1.18542	0.0957964	0.189842
PRE4g9-RIB1-TRg-4	0.0483619	0.573998	0.0493255	0.570731
PRE4g9-COG1-TRg-1	-0.099031	-1.31255	-0.105999	0.362086
PRE4g9-RPL32-NRg-2	0.0543201	0.650259	0.0530269	0.771175
PRE4g9-GLC7-NRg-3	0.0712593	0.867071	0.0674707	0.770514
PRE4g9-GLC7-NRg-4	-0.0411535	-0.571751	-0.0460893	0.554827
PRE4g9-HSF1-TRg-2	0.0363894	0.420757	0.0366651	0.647379
PRE4g9-DAM1-NRg-5	-0.0556225	-0.756945	-0.0542143	0.532382
PRE4g9-SEC18-TRg-4	0.0812773	0.995297	0.0804185	0.729745
PRE4g9-SEC18-TRg-5	-0.0550836	-0.750048	-0.0554749	0.762094
PRE4g9-PAB1-NRg-3	-0.0263495	-0.382267	-0.0303754	0.695423
PRE4g9-POP8-TRg-2	0.0417504	0.489374	0.0410921	0.76058
PRE4g9-PAB1-NRg-4	-0.0612292	-0.828708	-0.0643229	0.740539
PRE4g9-BIG1-TRg-4	-0.011986	-0.198423	-0.0140799	0.95132
PRE4g9-BIG1-TRg-5	-0.000293889	-0.0487696	-0.000881774	0.998952
PRE4g9-BIG1-TRg-6	-0.0587697	-0.797227	-0.0580257	0.518943
PRE4g9-RPO41-NRg-1	0.0513072	0.611696	0.0505932	0.687593
PRE4g9-RVB2-NRg-2	0.0559599	0.671248	0.0541437	0.616933
PRE4g9-PET117-NRg-8	-0.0277425	-0.400097	-0.0316908	0.796729
PRE4g9-VPS45-NRg-9	-0.00812886	-0.149053	-0.0111036	0.874925
PRE4g9-YCG1-NRg-1	0.0640848	0.775241	0.0647289	0.371628
PRE4g9-NOC4-NRg-1	-0.0176932	-0.271471	-0.0159331	0.867235
PRE4g9-NMD3-NRg-2	-0.0219163	-0.325525	-0.0221832	0.820105
PRE4g9-DRS1-TRg-2	0.027326	0.30475	0.0290057	0.792091
PRE4g9-HTB1-NRg-2	0.0224225	0.241988	0.0212732	0.818014
PRE4g9-IPI1-TRg-2	-0.0274432	-0.396265	-0.0267946	0.811649
PRE4g9-SEC18-NRg-1	0.0619999	0.748557	0.0599074	0.58879
PRE4g9-SEC18-NRg-2	-0.00127062	-0.0612712	-0.00412108	0.98365
PRE4g9-JIP5-NRg-2	0.0815801	0.999172	0.0851974	0.636841
PRE4g9-YPT1-TRg-3	-0.126146	-1.65961	-0.13247	0.538789
PRE4g9-YPT1-TRg-2	-0.123303	-1.62322	-0.1319	0.45459
PRE4g9-CLF1-NRg-2	0.0681643	0.827457	0.0697781	0.180326
PRE4g9-SNF2-NRg-7	0.0182998	0.189219	0.0163884	0.858948
PRE4g9-SNF2-NRg-4	0.00422404	0.00905738	0.00707096	0.299445
PRE4g9-RPL25-NRg-1	-0.0656474	-0.885258	-0.0689214	0.459767
PRE4g9-NOP56-TRg-1	-0.0298808	-0.427466	-0.0276134	0.839264
PRE4g9-NOP56-TRg-2	-0.0319309	-0.453705	-0.0294361	0.863031
PRE4g9-TRS31-TRg-1	-0.136921	-1.79753	-0.142629	0.286568
PRE4g9-DBF4-TRg-2	0.0255732	0.282315	0.0246989	0.799941
PRE4g9-DBF4-TRg-1	-0.00564845	-0.117305	-0.00502275	0.944375
PRE4g9-RPC19-TRg-4	-0.0434687	-0.601384	-0.0427494	0.656664
PRE4g9-RPC19-TRg-6	-0.0237676	-0.34922	-0.022938	0.835508
PRE4g9-RPC19-TRg-3	-0.0723617	-0.971198	-0.0718914	0.678633
PRE4g9-ROK1-NRg-1	0.0322086	0.367244	0.0326325	0.615495
PRE4g9-CDC33-TRg-4	0.0459416	0.543019	0.0517567	0.592376
PRE4g9-DHR2-TRg-3	-0.125113	-1.64639	-0.127941	0.29173
PRE4g9-RRP42-NRg-5	-0.00133521	-0.062098	0.00101155	0.978578
PRE4g9-CLF1-TRg-1	0.0765796	0.935168	0.0769213	0.536463
PRE4g9-ERG11-NA-16	0.0153316	0.151228	0.0147164	0.538866
PRE4g9-VAS1-NRg-4	0.0868171	1.0662	0.0870133	0.474355
PRE4g9-PIK1-NRg-2	0.00486857	0.017307	0.00548567	0.971575
PRE4g9-SAR1-NRg-7	0.0169925	0.172486	0.0140911	0.872642
PRE4g9-SAR1-NRg-4	0.0185473	0.192387	0.0168266	0.895011
PRE4g9-RPS3-TRg-1	-0.028418	-0.408742	-0.0288836	0.703574
PRE4g9-YTM1-TRg-2	0.00322417	-0.00374045	0.00401534	0.971664
PRE4g9-SUI3-NRg-5	0.0701912	0.853401	0.0696069	0.658365
PRE4g9-SUI3-NRg-2	-0.0482092	-0.662059	-0.0458847	0.736604
PRE4g9-RRP7-TRg-4	0.0082728	0.0608792	0.0106782	0.937271
PRE4g9-RRP7-TRg-6	0.0448355	0.528862	0.0462337	0.647763
PRE4g9-NIP7-TRg-2	-0.00175202	-0.0674328	-0.000553807	0.997684
PRE4g9-MDM35-TRg-1	0.0286947	0.322269	0.0270263	0.889967
PRE4g9-ALA1-NRg-1	0.00892269	0.0691975	0.0104178	0.948451
PRE4g9-DOA4-NRg-2	-0.0156692	-0.245565	-0.0175966	0.677859
PRE4g9-RPS13-NRg-1	-0.00767364	-0.143226	-0.00923591	0.932914
PRE4g9-YSF3-TRg-2	0.0382913	0.445099	0.0402069	0.624165
PRE4g9-RPS2-NRg-11	-0.16061	-2.10072	-0.162177	0.333176
PRE4g9-SSL1-TRg-10	-0.00413899	-0.0979848	-0.00236319	0.980323
PRE4g9-NIP7-TRg-1	0.0435613	0.512552	0.045346	0.782603
PRE4g9-LST8-NRg-1	0.120057	1.49166	0.115117	0.671296
PRE4g9-TAF4-TRg-3	-0.0707013	-0.949946	-0.0764962	0.700297
PRE4g9-HAS1-TRg-2	-0.055541	-0.755902	-0.0553991	0.18735
PRE4g9-GLC7-TRg-2	NA	NA	NA	NA
PRE4g9-CDC45-NRg-1	0.113243	1.40444	0.114525	0.437832
PRE4g9-SEC22-NRg-8	-0.0161705	-0.251981	-0.0191089	0.911608
PRE4g9-YOS1-TRg-2	0.0129652	0.12094	0.0156019	0.917757
PRE4g9-RBA50-TRg-3	0.0067687	0.0416275	0.00759946	0.958047
PRE4g9-SPP41-NRg-2	-0.0135785	-0.218805	-0.0139157	0.7687
PRE4g9-PRP46-TRg-2	0.0361502	0.417694	0.0379021	0.727732
PRE4g9-PGA2-NRg-1	0.0928926	1.14397	0.0948877	0.613531
PRE4g9-CBF5-TRg-3	-0.0260988	-0.379058	-0.0239219	0.810388
PRE4g9-TCP1-NRg-3	-0.0182814	-0.279	-0.0187287	0.852638
PRE4g9-TCP1-NRg-2	-0.0321671	-0.45673	-0.0325181	0.741903
PRE4g9-ERG26-NRg-2	-0.0656854	-0.885744	-0.0663043	0.52243
PRE4g9-ERG26-NRg-4	-0.10919	-1.44258	-0.109075	0.458794
PRE4g9-MES1-TRg-5	0.0796277	0.974182	0.0798068	0.533188
PRE4g9-HTS1-TRg-2	-0.0340324	-0.480604	-0.0323787	0.261854
PRE4g9-SSS1-TRg-3	0.0252703	0.278438	0.0228785	0.78338
PRE4g9-SSS1-TRg-2	0.0490683	0.583039	0.0480543	0.800182
PRE4g9-SYS1-TRg-7	-0.126887	-1.66909	-0.131648	0.243208
PRE4g9-SYS1-TRg-2	0.0584439	0.703042	0.0525048	0.499767
PRE4g9-SYS1-TRg-1	-0.0125541	-0.205694	-0.0160889	0.931154
PRE4g9-BFR2-TRg-1	0.0207615	0.220727	0.0223842	0.642748
PRE4g9-EOS1-TRg-3	-0.0283338	-0.407665	-0.0299013	0.736946
PRE4g9-TAF4-NRg-1	0.0858883	1.05431	0.0827446	0.65367
PRE4g9-ARL3-NRg-8	-0.00867653	-0.156063	-0.00503426	0.909068
PRE4g9-RPN5-NRg-1	0.0761589	0.929784	0.0781079	0.190728
PRE4g9-TIM9-NRg-2	-0.0185183	-0.282032	-0.017371	0.872105
PRE4g9-NUP57-NRg-3	0.113798	1.41154	0.110112	0.381835
PRE4g9-VPS4-TRg-1	NA	NA	NA	NA
PRE4g9-CDC3-TRg-4	-0.00317091	-0.0855939	-0.00566944	0.925218
PRE4g9-BBP1-NRg-1	0.00725662	0.0478728	0.00720933	0.557028
PRE4g9-BBP1-NRg-2	0.0100291	0.0833585	0.0103352	0.877974
PRE4g9-USE1-NRg-3	0.0138604	0.132398	0.0166568	0.693609
PRE4g9-CCT7-TRg-1	-0.0511002	-0.699062	-0.0486711	0.743521
PRE4g9-SAH1-TRg-3	-0.0629325	-0.850509	-0.0629383	0.253056
PRE4g9-CHS2-TRg-1	0.0521881	0.622971	0.0521204	0.568735
PRE4g9-DPM1-TRg-2	-0.0290477	-0.416802	-0.0268531	0.62369
PRE4g9-BBP1-TRg-1	0.0284833	0.319562	0.0285187	0.787535
PRE4g9-NRD1-TRg-4	0.0523888	0.62554	0.0527597	0.538727
PRE4g9-RPB3-NRg-1	0.0177694	0.18243	0.0138344	0.952255
PRE4g9-PHO85-NRg-6	-0.0279049	-0.402175	-0.0300027	0.868483
PRE4g9-SNF6-TRg-6	-0.0706355	-0.949104	-0.0719951	0.413299
PRE4g9-PRP38-NRg-2	0.0915585	1.12689	0.0893876	0.361881
PRE4g9-OAR1-NRg-3	-0.00213624	-0.0723507	-0.00339725	0.986544
PRE4g9-ROX3-NRg-1	-0.0191434	-0.290033	-0.0160989	0.848809
PRE4g9-YPP1-TRg-6	-0.0344216	-0.485586	-0.0349882	0.681668
PRE4g9-CBF2-NRg-8	0.0475916	0.564138	0.0491237	0.726091
PRE4g9-SPT6-TRg-5	0.0136803	0.130092	0.0105228	0.920338
PRE4g9-SEC10-NRg-1	0.179105	2.24743	0.179776	0.54358
PRE4g9-NSL1-NRg-3	0.0566857	0.680537	0.054084	0.481557
PRE4g9-NRD1-NRg-8	-0.0036254	-0.0914112	-0.00288243	0.989474
PRE4g9-RPB3-TRg-1	0.0114873	0.102023	0.0101013	0.873573
PRE4g9-NRD1-NRg-4	-0.00191776	-0.0695542	-0.00066738	0.998197
PRE4g9-RVB1-TRg-2	0.0955376	1.17782	0.0931261	0.330161
PRE4g9-TIF5-NRg-8	0.0659534	0.799158	0.0662098	0.36476
PRE4g9-EOS1-NRg-1	-0.00584382	-0.119806	-0.00829342	0.951872
PRE4g9-ERG25-NA-26	-0.132803	-1.74481	-0.132108	0.324791
PRE4g9-MSL5-NRg-4	-0.0254951	-0.371331	-0.0228965	0.695893
PRE4g9-SEC24-TRg-2	0.00169927	-0.0232582	-0.00223115	0.992747
PRE4g9-RPL30-NRg-5	-0.17635	-2.30219	-0.179815	0.143652
PRE4g9-SNU71-NRg-3	0.0207025	0.219972	0.0227441	0.533695
PRE4g9-CDC33-NRg-1	0.00815985	0.0594336	0.00848734	0.933407
PRE4g9-RPN6-TRg-4	0.0492961	0.585954	0.0506361	0.725296
PRE4g9-NAB2-TRg-4	0.0730204	0.889613	0.0734295	0.409798
PRE4g9-NAB2-TRg-6	0.0480734	0.570304	0.048833	0.650203
PRE4g9-YTM1-NRg-1	-0.0158866	-0.248348	-0.0145932	0.933792
PRE4g9-OLE1-TRg-8	-0.0236988	-0.348339	-0.0243644	0.739319
PRE4g9-OLE1-TRg-1	-0.00724672	-0.137762	-0.00627341	0.978556
PRE4g9-UTP7-TRg-4	-0.0421503	-0.584509	-0.0417697	0.841301
PRE4g9-ACT1-NRg-6	0.0359403	0.415008	0.035114	0.497434
PRE4g9-RPL18A-NRg-3	-0.0318779	-0.453027	-0.0337064	0.696199
PRE4g9-BRX1-NRg-1	-0.116499	-1.53613	-0.115335	0.193001
PRE4g9-NAF1-TRg-8	-0.0338461	-0.478219	-0.0321732	0.816087
PRE4g9-NAF1-TRg-6	-0.0317218	-0.45103	-0.0295833	0.818477
PRE4g9-NAF1-TRg-4	0.0159123	0.15866	0.0174984	0.630846
PRE4g9-CDC8-TRg-2	0.0010137	-0.0320332	0.00289764	0.982347
PRE4g9-NSE4-TRg-1	0.0487356	0.578781	0.0478482	0.675208
PRE4g9-PAB1-NRg-2	0.126322	1.57185	0.120736	0.279522
PRE4g9-PRP43-TRg-4	0.0569831	0.684344	0.0560135	0.307922
PRE4g9-SEC2-NRg-3	0.032872	0.375735	0.0319922	0.582462
PRE4g9-SEC2-NRg-6	0.0109656	0.095345	0.0113425	0.895267
PRE4g9-MPP10-NRg-5	-0.0499731	-0.684636	-0.0483025	0.667256
PRE4g9-YDR355C-TRg-2	0.00155712	-0.0250777	0.00241296	0.970305
PRE4g9-YLR339C-TRg-9	-0.0401055	-0.558336	-0.0414525	0.786303
PRE4g9-SNM1-TRg-2	0.069966	0.850517	0.0713121	0.307301
PRE4g9-ALR1-NRg-4	-0.0269217	-0.389591	-0.0269099	0.789452
PRE4g9-ALR1-NRg-1	-0.0525887	-0.718114	-0.0550882	0.846536
PRE4g9-ALR1-NRg-3	0.0273026	0.30445	0.027812	0.834252
PRE4g9-RPL10-TRg-1	-0.0446006	-0.61587	-0.043491	0.618624
PRE4g9-RPL28-TRg-2	0.0164717	0.16582	0.0153284	0.934714
PRE4g9-UTP25-TRg-1	-0.00454854	-0.103227	-0.00348114	0.969668
PRE4g9-POB3-TRg-1	-0.0242201	-0.355012	-0.024005	0.793912
PRE4g9-POB3-TRg-3	0.0162536	0.163029	0.0127098	0.899081
PRE4g9-POB3-TRg-2	-0.0209324	-0.312932	-0.02042	0.922284
PRE4g9-MED11-TRg-1	-0.00323765	-0.0864481	-0.00376845	0.980672
PRE4g9-ISA1-TRg-15	-0.0232275	-0.342308	-0.0301512	0.917943
PRE4g9-RRP1-NRg-1	0.0103702	0.087725	0.00953604	0.695762
PRE4g9-MES1-NRg-1	-0.0557167	-0.75815	-0.0555234	0.716526
PRE4g9-SEC13-NRg-5	0.0167441	0.169307	0.0115286	0.923955
PRE4g9-MCM2-NRg-2	0.00948377	0.076379	0.0111343	0.916433
PRE4g9-ALA1-TRg-4	0.0638998	0.772874	0.0612632	0.865961
PRE4g9-MTG2-TRg-5	0.0318056	0.362086	0.0309764	0.40054
PRE4g9-TIF35-NRg-3	0.077707	0.949599	0.0794688	0.416696
PRE4g9-NSE1-TRg-3	-0.0355163	-0.499597	-0.0341566	0.720164
PRE4g9-NSE1-TRg-4	-0.013501	-0.217814	-0.012728	0.946875
PRE4g9-MOB2-NRg-6	-0.0555556	-0.756089	-0.0572911	0.794781
PRE4g9-VRG4-NRg-3	0.0231856	0.251754	0.0187202	0.836565
PRE4g9-PRP9-TRg-3	0.0419438	0.491849	0.0425547	0.234508
PRE4g9-HYM1-TRg-5	0.0849228	1.04196	0.0830765	0.61554
PRE4g9-POP1-TRg-5	0.00419883	0.00873475	0.00514164	0.975565
PRE4g9-POP1-TRg-9	0.0377582	0.438276	0.0383778	0.804148
PRE4g9-RPL17A-TRg-1	-0.0245489	-0.35922	-0.0241685	0.486056
PRE4g9-SLD2-TRg-1	-0.0229784	-0.339119	-0.0216259	0.629903
PRE4g9-CDC48-NRg-7	-0.00559602	-0.116634	-0.009607	0.910758
PRE4g9-FHL1-NRg-2	-0.100694	-1.33383	-0.100535	0.211242
PRE4g9-BET3-NRg-7	0.0174386	0.178197	0.0171496	0.928228
PRE4g9-MAK21-TRg-1	0.00467645	0.014848	0.00450137	0.975178
PRE4g9-BRN1-TRg-4	-0.0155992	-0.244669	-0.0175394	0.783546
PRE4g9-FBA1-NRg-3	-0.0102643	-0.176386	-0.010155	0.926582
PRE4g9-CDC42-TRg-6	0.096914	1.19544	0.0945997	0.682105
PRE4g9-CDC42-TRg-7	0.0107116	0.092094	0.00785921	0.953585
PRE4g9-COG4-NRg-1	-0.0634852	-0.857584	-0.0665069	0.406798
PRE4g9-ATP3-NRg-3	-0.0410603	-0.570557	-0.0397737	0.294822
PRE4g9-ATP3-NRg-2	0.0107086	0.0920565	0.011945	0.929336
PRE4g9-SMP3-TRg-5	-0.0507342	-0.694378	-0.0488815	0.311347
PRE4g9-CFT2-NRg-2	0.0343524	0.394684	0.0336044	0.640165
PRE4g9-FAS2-TRg-5	0.0807228	0.988199	0.0832282	0.5438
PRE4g9-DBP2-NRg-3	-0.0346229	-0.488162	-0.0320859	0.611261
PRE4g9-DBP2-NRg-2	0.127471	1.58656	0.129355	0.30645
PRE4g9-MPS2-NRg-4	-0.0195396	-0.295105	-0.019145	0.816879
PRE4g9-ARC35-TRg-2	-0.0482731	-0.662877	-0.0490091	0.470763
PRE4g9-ARC35-TRg-5	0.0395802	0.461596	0.0314044	0.8555
PRE4g9-MRD1-TRg-1	0.0388303	0.451998	0.0395824	0.382576
PRE4g9-RLP7-TRg-1	0.0314624	0.357693	0.0315731	0.270538
PRE4g9-SPC34-TRg-1	-0.103247	-1.36651	-0.102309	0.575612
PRE4g9-CDC45-TRg-2	-0.0489114	-0.671047	-0.047293	0.666254
PRE4g9-GCD6-TRg-3	0.0220062	0.236659	0.0229753	0.904193
PRE4g9-GCD6-TRg-4	0.00935629	0.0747474	0.0108027	0.949726
PRE4g9-YPT6-NRg-2	NA	NA	NA	NA
PRE4g9-RPS13-TRg-2	-0.0433498	-0.599862	-0.0433351	0.317932
PRE4g9-IPI3-TRg-3	-0.0320044	-0.454647	-0.0301319	0.419066
PRE4g9-TIF5-NRg-9	0.0873102	1.07251	0.0867853	0.404619
PRE4g9-TIF5-NRg-7	-0.0293989	-0.421298	-0.0285957	0.806283
PRE4g9-TIF5-NRg-6	-0.0196204	-0.296138	-0.0194594	0.714085
PRE4g9-NAB3-TRg-3	-0.0224563	-0.332436	-0.0246249	0.869492
PRE4g9-GCD2-TRg-1	0.0840903	1.0313	0.0857871	0.627534
PRE4g9-UBA1-TRg-2	0.0152486	0.150166	0.015294	0.636021
PRE4g9-SLD3-TRg-6	-0.0604574	-0.81883	-0.0613127	0.716495
PRE4g9-LCB1-TRg-5	0.0325499	0.371612	0.0352923	0.332295
PRE4g9-TOA2-TRg-6	-0.0725454	-0.973549	-0.0756826	0.326028
PRE4g9-TOA2-TRg-1	0.0317741	0.361683	0.030643	0.748163
PRE4g9-TOA2-TRg-3	-0.0257892	-0.375096	-0.0276659	0.929295
PRE4g9-LSM2-TRg-1	-0.0525693	-0.717866	-0.0468322	0.637495
PRE4g9-YML6-TRg-13	0.0337376	0.386815	0.0339439	0.718827
PRE4g9-YML6-TRg-12	0.0203747	0.215777	0.0230022	0.825879
PRE4g9-UTP15-NRg-1	0.0383852	0.446301	0.0382136	0.622707
PRE4g9-TIF6-NRg-8	0.0311573	0.353789	0.0289964	0.74557
PRE4g9-SUP35-NRg-1	0.0322359	0.367593	0.0293932	0.650484
PRE4g9-MPP10-NRg-1	-0.0779617	-1.04287	-0.0769966	0.610424
PRE4g9-SWI3-TRg-7	-0.00702968	-0.134984	-0.00773705	0.972352
PRE4g9-SSN3-NRg-2	0.00280874	-0.00905767	0.00849707	0.806283
PRE4g9-SEC13-NRg-7	-0.0304093	-0.43423	-0.0319992	0.751507
PRE4g9-RPS15-NRg-3	-0.0537682	-0.733211	-0.0546306	0.844899
PRE4g9-RPL3-TRg-2	-0.0623279	-0.842771	-0.0641375	0.557444
PRE4g9-FBA1-NRg-2	0.0324503	0.370338	0.0319637	0.403614
PRE4g9-FBA1-NRg-1	-0.000710842	-0.0541064	-0.000344049	0.99582
PRE4g9-FBA1-NRg-5	0.034557	0.397303	0.0354452	0.910758
PRE4g9-DAM1-TRg-2	-0.0727631	-0.976336	-0.0761758	0.692026
PRE4g9-NHP2-TRg-2	0.00258226	-0.0119565	0.00460037	0.979222
PRE4g9-HCA4-NRg-6	-0.0130955	-0.212624	-0.0115976	0.895566
PRE4g9-PRE3-TRg-4	-0.0541257	-0.737787	-0.0594741	0.784531
PRE4g9-DBP5-NRg-4	0.0481615	0.571432	0.0492871	0.568223
PRE4g9-SPT6-NRg-4	0.0794463	0.97186	0.0810081	0.300586
PRE4g9-SPT6-NRg-2	0.0769445	0.939838	0.0791558	0.613823
PRE4g9-RPL18A-TRg-4	0.0676678	0.821102	0.0680927	0.351229
PRE4g9-KSH1-TRg-1	0.108578	1.34473	0.110002	0.614693
PRE4g9-KSH1-TRg-3	0.0392783	0.457733	0.0397548	0.587819
PRE4g9-IPI3-NRg-1	-0.0100486	-0.173624	-0.00918042	0.931268
PRE4g9-PGA2-TRg-8	0.0527803	0.63055	0.0557594	0.431857
PRE4g9-RPL18A-TRg-2	-0.0135502	-0.218443	-0.0139236	0.959995
PRE4g9-RPL33A-NRg-6	-0.0323012	-0.458445	-0.0335099	0.797446
PRE4g9-TAF12-NRg-2	-0.0104498	-0.178759	-0.011578	0.926664
PRE4g9-USE1-TRg-5	0.0272619	0.30393	0.0302494	0.624706
PRE4g9-YNL114C-TRg-1	0.0213121	0.227775	0.0236927	0.873648
PRE4g9-SMC5-TRg-7	-0.0338659	-0.478473	-0.0332798	0.666635
PRE4g9-SMC5-TRg-6	0.00208679	-0.0182982	0.00347362	0.937271
PRE4g9-RSC58-TRg-1	0.00981881	0.0806673	0.0114931	0.503119
PRE4g9-CTF13-TRg-2	-0.0420193	-0.582832	-0.0421508	0.50171
PRE4g9-NAB2-NRg-2	0.0917684	1.12958	0.0929291	0.555393
PRE4g9-MCM7-TRg-4	-0.0150343	-0.237438	-0.0149558	0.867607
PRE4g9-BCP1-NRg-5	-0.0353717	-0.497746	-0.043082	0.846953
PRE4g9-STU2-TRg-3	0.0500982	0.596221	0.0480844	0.417127
PRE4g9-SEC21-NRg-6	0.079186	0.968529	0.0784048	0.254198
PRE4g9-SEC21-NRg-3	-0.0159068	-0.248606	-0.0192409	0.897647
PRE4g9-RPL1B-TRg-3	-0.000867505	-0.0561116	-0.00209693	0.991735
PRE4g9-SEC20-NRg-2	0.0330555	0.378083	0.0358877	0.516342
PRE4g9-VMA3-NRg-2	0.00453163	0.0129944	0.00137135	0.995931
PRE4g9-SEC23-NRg-5	-0.0377172	-0.527768	-0.0386228	0.739976
PRE4g9-CDC28-TRg-4	-0.0380396	-0.531893	-0.0380795	0.867235
PRE4g9-RPN12-NRg-11	-0.0450317	-0.621389	-0.043514	0.657419
PRE4g9-PUP3-TRg-3	0.0357621	0.412727	0.0380745	0.792731
PRE4g9-SEC31-TRg-2	-0.066343	-0.894161	-0.0653623	0.76058
PRE4g9-SED5-TRg-6	-0.0178557	-0.273551	-0.0173542	0.892145
PRE4g9-SED5-TRg-5	0.0661633	0.801846	0.0670831	0.678928
[truncated: 13,995 more rows]

## Sheet: scura
strain	gi_score_method1	zscore_method1	gi_score_method2	qval_method2
[truncated: 15,200 more rows]
