# Supplementary material for: Improved discovery of genetic interactions using CRISPRiSeq across multiple environments
Source: HighWire-hosted journal article supplement (doi:10.1101/gr.246603.118), 2019-02-19
Supplement: Supplemental_CRISPRiSeq-master.zip [file visual_workflow.pdf › CRISPRiSeq-master/visual_workflow.pdf]

# Workflow for Double CRISPRi sequencing data analysis

## fastq files

Seqlib11\_R1.fastq  
Seqlib11\_R2.fastq  
Seqlib12\_R1.fastq  
Seqlib12\_R2.fastq  
Seqlib13\_R1.fastq  
Seqlib13\_R2.fastq

## Process raw sequencing data

**Code** (for each sequencing lane  
run following scripts sequentially):  
pull\_tags\_double\_crispri\_v2\_seqlibXX.py  
parse\_discarded\_seqlibXX.py

## Count data

Two files generated per lane from python scripts:  
all\_counts.txt  
recovered\_counts.txt

## Normalize count data to remove PCR chimeras

**Code** (separate R  
markdown with QC on  
each lanes data):  
seqlibXX.Rmd

## Fitness and GI Data:

Two files per condition, one with all  
information and one abbreviated:

ypd24\_data.txt  
ypd24\_short.txt  
ypd48\_data.txt  
ypd48\_short.txt  
ypeg\_data.txt  
ypeg\_short.txt  
ypd37\_data.txt  
ypd37\_short.txt  
ura\_data.txt  
ura\_short.txt

## Compute fitness and GI score estimates

**Code** (data from all lanes  
combined and analyzed in one  
R markdown file):  
fit\_gi\_v4.Rmd

## Count data (chimeras removed)

One file per lane:  
seqlibXX\_chimera\_normalized\_counts.Rdata

Also saved raw counts to RData objects:  
seqlibXX\_raw\_counts.RData

## Visualize data

**Code:**  
One R markdown file per figure  
and an additional file for all  
supplemental figures

## Manuscript Figures
